# Supplementary material for: Profiling cell envelope-antibiotic interactions reveals vulnerabilities to β-lactams in a multidrug-resistant bacterium
Source: Research Square preprint supplement (doi:10.21203/rs.3.rs-2583913/v1), 2023-02-16
Supplement: Supplementary file 1 [file db165a40bbc7956dd107462e.xlsx]

## Sheet: Sheet1
		Supplementary Data 1			.
		Spreadsheet containing all gene fitness scores for every condition tested in this study.
		The output is modified slightly from that obtained using the Dutton lab's RB-TnSeq comparison scripts (https://github.com/DuttonLab/RB-TnSeq-Microbial-interactions)
		For each gene in each condition, the following information is given:
		locus tag, chromosome number and position on it
		annotations from the K56-2 closed genome gb file and by homology from eggNOG-mapper v2. Gene name is also taken from eggNOG-mapper v2
		fitness scores and statistics for 3 biological replicates comparing DMSO control to experimental condition
		pvalue (no multiple testing correction) and adjpvalue (adjusted for multiple testing)
		category as defined by P-value: Not_sig (p >0.05), Sig ( p<0.05), not_tested (variances were different and not normally distributed, so t-test was not performed)
		delta is defined as the difference in gene score DMSO minus the experimental condition
		The data is broken into 2 sheets, based on which sets of conditions were performed together. Each set of conditions was compared to its own DMSO and Time0 control.
		Sheet 1:
		Amp	Baci	Cefot	CHIR	Cyclo	Ery	Fos	Fr9	Hex	Novo	PF04	PmB	Rif	Taz
		Sheet 2:
		AC	Avi8	AviH	Az	CazH	CazL	Cefi	Mero

## Sheet: Sheet1_big
locusId	sysName	scaffoldId	begin	end	name	desc	eggNOG	gene	Fit_C1	Var_C1	SD_C1	Cond1	Fit_C2	Var_C2	SD_C2	Cond2	Fcalc	Tcalc	pvalue	adjpvalue_fdr	Category		Delta
K562_RS00005	K562_RS00005	CP053300	431	1645	No_name	cation:proton antiporter	Pfam Sodium hydrogen exchanger	0	0.866605	0.999634	0.362768	DMSO	0.412757	1.61277	0.117055	Amp	9.60459	2.06222	0.10818	0.683949	Not_Sig		-0.453849
K562_RS00010	K562_RS00010	CP053300	1660	2775	No_name	glutamate--cysteine ligase	ATP-dependent carboxylate-amine ligase which exhibits weak glutamate--cysteine ligase activity	ybdK	0.139022	1.51856	0.411434	DMSO	0.600891	1.03525	0.366085	Amp	1.26309	-1.4526	0.219986	0.789927	Not_Sig		0.461869
K562_RS00015	K562_RS00015	CP053300	3283	3921	No_name	winged helix-turn-helix transcriptional regulator	Regulatory protein MarR	0	1.15186	0.172909	0.36946	DMSO	0.932515	0.123944	0.187203	Amp	3.89501	0.91727	0.410903	0.915067	Not_Sig		-0.219344
K562_RS00020	K562_RS00020	CP053300	3950	4660	No_name	glutamine amidotransferase	Glutamine amido-transferase	0	-0.888345	2.48838	0.0625332	DMSO	0.665986	1.09586	0.858564	Amp	188.506	NA	NA	NA	Not_tested		1.55433
K562_RS00025	K562_RS00025	CP053300	4871	5983	No_name	NADH:flavin oxidoreductase/NADH oxidase	NADH flavin oxidoreductase NADH oxidase	0	-0.191836	2.17003	0.162575	DMSO	-0.561124	2.04594	0.442024	Amp	7.39238	1.35809	0.245988	0.816015	Not_Sig		-0.369288
K562_RS00030	K562_RS00030	CP053300	6161	6691	No_name	SET domain-containing protein-lysine N-methyltransferase	Nuclear protein SET	0	-0.383174	1.7346	0.258757	DMSO	-0.451263	1.53893	0.142053	Amp	3.31805	0.399527	0.709919	0.965336	Not_Sig		-0.0680895
K562_RS00035	K562_RS00035	CP053300	6845	8329	No_name	sensor histidine kinase	PhoQ Sensor	0	0.0853253	1.5928	0.299609	DMSO	0.0892949	1.20631	0.359086	Amp	1.43644	-0.0147016	0.988974	0.997922	Not_Sig		0.00396952
K562_RS00040	K562_RS00040	CP053300	8450	9142	No_name	response regulator transcription factor	response regulator	0	0.310208	0.657127	0.222052	DMSO	0.486552	0.626768	0.0915568	Amp	5.88207	-1.27166	0.272402	0.83512	Not_Sig		0.176344
K562_RS00045	K562_RS00045	CP053300	9265	9495	No_name	DUF3717 domain-containing protein	Protein of unknown function (DUF3717)	0	0.842691	0.168703	0.365245	DMSO	0.937423	0.430501	0.21004	Amp	3.02388	-0.389432	0.716801	0.965921	Not_Sig		0.0947319
K562_RS00050	K562_RS00050	CP053300	9588	9896	No_name	4a-hydroxytetrahydrobiopterin dehydratase	pterin-4-alpha-carbinolamine dehydratase	phhB	0.0684606	1.6454	1.11593	DMSO	0.736197	0.44173	0.387969	Amp	8.2733	-0.97893	0.383043	0.895381	Not_Sig		0.667736
K562_RS00055	K562_RS00055	CP053300	10057	10983	No_name	phenylalanine 4-monooxygenase	#N/A	#N/A	0.0943389	2.18007	0.530858	DMSO	0.0472588	1.80463	0.121498	Amp	19.0904	0.149738	0.888218	0.984305	Not_Sig		-0.0470801
K562_RS00060	K562_RS00060	CP053300	11090	11575	No_name	Lrp/AsnC family transcriptional regulator	AsnC family transcriptional regulator	0	0.808408	0.423913	0.259273	DMSO	0.639554	0.468381	0.747501	Amp	8.31205	0.36965	0.730381	0.96687	Not_Sig		-0.168854
K562_RS00065	K562_RS00065	CP053300	11647	12180	No_name	class IV adenylate cyclase	Adenylate cyclase	0	-0.304705	2.07503	0.87405	DMSO	-0.0857716	2.01037	0.151744	Amp	33.1781	-0.427453	0.691056	0.963653	Not_Sig		0.218934
K562_RS00070	K562_RS00070	CP053300	12385	13284	No_name	LysR family transcriptional regulator	transcriptional Regulator, LysR family	0	-0.363046	1.87683	0.12851	DMSO	-0.565622	1.92568	0.231442	Amp	3.24345	1.32541	0.255668	0.827997	Not_Sig		-0.202576
K562_RS00075	K562_RS00075	CP053300	13473	15158	No_name	choline dehydrogenase	(GMC) oxidoreductase	betA	-0.340399	1.9835	0.115247	DMSO	-0.317361	1.67322	0.215172	Amp	3.4859	-0.163476	0.878071	0.982574	Not_Sig		0.0230381
K562_RS00080	K562_RS00080	CP053300	15597	16376	No_name	ABC transporter ATP-binding protein	abc transporter	0	-0.55844	1.83193	1.02487	DMSO	-0.429465	2.00424	0.217137	Amp	22.2775	-0.213239	0.841568	0.98107	Not_Sig		0.128975
K562_RS00085	K562_RS00085	CP053300	16373	17128	No_name	ABC transporter ATP-binding protein	Amino acid amide ABC transporter ATP-binding protein 2, HAAT family	0	0.388181	1.44144	0.177366	DMSO	0.120443	1.57311	0.497816	Amp	7.87761	0.877507	0.429756	0.915703	Not_Sig		-0.267738
K562_RS00090	K562_RS00090	CP053300	17206	18405	No_name	ABC transporter substrate-binding protein	abc transporter	0	0.114685	1.4314	0.145714	DMSO	0.142668	1.41682	0.111769	Amp	1.69965	-0.263927	0.804876	0.975481	Not_Sig		0.0279833
K562_RS00095	K562_RS00095	CP053300	18538	19422	No_name	branched-chain amino acid ABC transporter permease	Belongs to the binding-protein-dependent transport system permease family	0	-0.425842	1.8208	0.154777	DMSO	-0.534924	1.96211	0.383147	Amp	6.12801	0.457217	0.671246	0.963146	Not_Sig		-0.109082
K562_RS00100	K562_RS00100	CP053300	19422	20399	No_name	branched-chain amino acid ABC transporter permease	Belongs to the binding-protein-dependent transport system permease family	0	-0.443415	1.74579	0.44835	DMSO	-0.166818	1.64594	0.283242	Amp	2.50565	-0.903371	0.417414	0.915703	Not_Sig		0.276597
K562_RS00105	K562_RS00105	CP053300	21481	22638	No_name	ABC transporter substrate-binding protein	amino acid	0	-0.519124	2.03265	0.412346	DMSO	-0.528606	2.26006	0.355583	Amp	1.34475	0.0301637	0.977381	0.997585	Not_Sig		-0.0094823
K562_RS00110	K562_RS00110	CP053300	22845	23900	No_name	branched-chain amino acid ABC transporter permease	Belongs to the binding-protein-dependent transport system permease family	0	0.0446298	1.7768	0.0449885	DMSO	-0.604506	2.1199	0.126513	Amp	7.90802	8.37344	0.00111258	0.139995	Sig		-0.649135
K562_RS00115	K562_RS00115	CP053300	23905	25689	No_name	branched-chain amino acid ABC transporter ATP-binding protein/permease	#N/A	#N/A	-0.0721451	1.60629	0.127863	DMSO	-0.331228	1.87037	0.381941	Amp	8.92283	1.11413	0.32765	0.87247	Not_Sig		-0.259083
K562_RS00120	K562_RS00120	CP053300	25689	26444	No_name	ABC transporter ATP-binding protein	abc transporter	0	-0.046318	1.46717	0.445562	DMSO	0.112984	0.950364	0.306123	Amp	2.11848	-0.510404	0.636645	0.959237	Not_Sig		0.159302
K562_RS00125	K562_RS00125	CP053300	26985	28955	No_name	tRNA uridine-5-carboxymethylaminomethyl(34) synthesis enzyme MnmG	NAD-binding protein involved in the addition of a carboxymethylaminomethyl (cmnm) group at the wobble position (U34) of certain tRNAs, forming tRNA-cmnm(5)s(2)U34	gidA	0.341744	0.62988	0.482027	DMSO	-0.199307	0.396851	0.790794	Amp	2.69144	1.01188	0.36883	0.891107	Not_Sig		-0.541051
K562_RS00130	K562_RS00130	CP053300	28952	29638	No_name	16S rRNA (guanine(527)-N(7))-methyltransferase RsmG	Specifically methylates the N7 position of guanine in position 527 of 16S rRNA	rsmG	0.284721	0.61913	0.381389	DMSO	-0.715889	0.329239	0.353829	Amp	1.16184	3.33135	0.0290691	0.492199	Sig		-1.00061
K562_RS00135	K562_RS00135	CP053300	29690	30469	No_name	ParA family protein	PFAM Cobyrinic acid a,c-diamide synthase	parA2	-2.5111	0.943217	0.127926	DMSO	-1.6249	1.53003	0.323857	Amp	6.40899	-4.40811	0.0116177	0.384363	Sig		0.886198
K562_RS00145	K562_RS00145	CP053300	31405	32535	No_name	anion permease	Citrate transporter	0	-0.380247	1.75811	0.388828	DMSO	-0.742514	2.43116	0.648083	Amp	2.77809	0.830225	0.453089	0.921271	Not_Sig		-0.362267
K562_RS00150	K562_RS00150	CP053300	33104	33628	No_name	ATP synthase subunit I	atp synthase	atpI	-0.935549	1.75811	2.44602	DMSO	-1.9184	2.43116	2.32558	Amp	1.10626	0.504385	0.640507	0.960003	Not_Sig		-0.982854
K562_RS00190	K562_RS00190	CP053300	40189	40614	No_name	F0F1 ATP synthase subunit epsilon	Produces ATP from ADP in the presence of a proton gradient across the membrane	atpC	-0.121813	1.75811	0.439085	DMSO	0.366027	2.43116	0.431689	Amp	1.03456	-1.37225	0.241908	0.814573	Not_Sig		0.48784
K562_RS00195	K562_RS00195	CP053300	40897	42624	No_name	AMP-binding protein	PFAM AMP-dependent synthetase and ligase	0	-0.382499	1.81056	0.303256	DMSO	-0.539899	1.81444	0.335347	Amp	1.22284	0.602979	0.579042	0.948571	Not_Sig		-0.1574
K562_RS00205	K562_RS00205	CP053300	43360	44172	No_name	transporter substrate-binding domain-containing protein	Belongs to the bacterial solute-binding protein 3 family	pheC	-0.372257	1.98998	0.366826	DMSO	-0.0686971	1.48878	0.270401	Amp	1.84037	-1.15374	0.31285	0.86256	Not_Sig		0.30356
K562_RS00220	K562_RS00220	CP053300	48507	52439	No_name	trifunctional transcriptional regulator/proline dehydrogenase/L-glutamate gamma-semialdehyde dehydrogenase	Oxidizes proline to glutamate for use as a carbon and nitrogen source	putA	0.174822	1.50421	0.307617	DMSO	0.0682544	1.40156	0.0562657	Amp	29.8905	0.590241	0.586761	0.948571	Not_Sig		-0.106568
K562_RS00225	K562_RS00225	CP053300	52524	53663	No_name	branched-chain amino acid ABC transporter substrate-binding protein	amino acid	0	-0.805147	1.77899	0.0969755	DMSO	-0.0392685	1.45849	0.310641	Amp	10.2611	-4.07632	0.0151441	0.410836	Sig		0.765878
K562_RS00235	K562_RS00235	CP053300	55230	56738	No_name	AMP-binding protein	amp-dependent synthetase and ligase	0	-0.503066	1.52551	0.626127	DMSO	-0.373042	2.20812	0.424273	Amp	2.17788	-0.297764	0.780708	0.972764	Not_Sig		0.130025
K562_RS00240	K562_RS00240	CP053300	56790	58442	No_name	acyl-CoA dehydrogenase family protein	acyl-CoA dehydrogenase	0	0.289528	1.15321	0.369822	DMSO	0.308908	1.26482	0.232897	Amp	2.5215	-0.0768046	0.942467	0.994456	Not_Sig		0.01938
K562_RS00245	K562_RS00245	CP053300	58563	59231	No_name	TetR/AcrR family transcriptional regulator	PFAM regulatory protein TetR	0	1.13034	1.15321	0.373686	DMSO	0.633887	1.26482	0.410102	Amp	1.2044	1.54984	0.196111	0.767647	Not_Sig		-0.496453
K562_RS00250	K562_RS00250	CP053300	59443	60597	No_name	pyridoxal phosphate-dependent aminotransferase	PFAM aminotransferase class I and II	0	0.756063	1.00731	0.601241	DMSO	0.848955	0.703531	0.23929	Amp	6.31316	-0.248633	0.815888	0.976845	Not_Sig		0.0928915
K562_RS00260	K562_RS00260	CP053300	62072	62860	No_name	ABC transporter substrate-binding protein	Belongs to the bacterial solute-binding protein 3 family	0	-0.328926	1.71745	0.242654	DMSO	0.774775	0.590825	0.67278	Amp	7.68729	-2.6729	0.0556376	0.603319	Not_Sig		1.1037
K562_RS00265	K562_RS00265	CP053300	62876	64306	No_name	FAD-binding oxidoreductase	PFAM FAD linked oxidase domain protein	0	0.654605	0.468633	0.412774	DMSO	0.684299	0.287191	0.123642	Amp	11.1453	-0.119359	0.910746	0.988311	Not_Sig		0.0296937
K562_RS00270	K562_RS00270	CP053300	64352	64924	No_name	PadR family transcriptional regulator	Transcriptional regulator PadR-like family	0	-0.0739639	1.59349	0.538466	DMSO	-0.0624939	1.2691	0.059256	Amp	82.5755	NA	NA	NA	Not_tested		0.0114699
K562_RS00275	K562_RS00275	CP053300	64993	65424	No_name	Cd(II)/Pb(II)-responsive transcriptional regulator	Cd(Ii) pb(Ii)-responsive transcriptional regulator	0	0.290516	1.12955	0.581843	DMSO	0.154942	1.32313	0.320914	Amp	3.28726	0.353392	0.741633	0.967973	Not_Sig		-0.135573
K562_RS00280	K562_RS00280	CP053300	65506	68046	No_name	heavy metal translocating P-type ATPase	Heavy metal translocating P-type atpase	cadA	0.0301888	1.53749	0.234932	DMSO	-0.414201	1.72061	0.185634	Amp	1.60166	2.57065	0.0619364	0.614703	Not_Sig		-0.44439
K562_RS00285	K562_RS00285	CP053300	68057	68434	No_name	zinc ribbon domain-containing protein	Zinc finger domain	0	0.937899	1.53749	0.499632	DMSO	1.27812	1.72061	0.0517007	Amp	93.3915	NA	NA	NA	Not_tested		0.340219
K562_RS00290	K562_RS00290	CP053300	68593	69474	No_name	AraC family transcriptional regulator	AraC family transcriptional regulator	0	0.00568871	1.81879	0.233836	DMSO	0.391257	1.2648	0.428471	Amp	3.35754	-1.36814	0.243085	0.815347	Not_Sig		0.385569
K562_RS00295	K562_RS00295	CP053300	69750	71213	No_name	mechanosensitive ion channel	Conserved TM helix	0	-0.131391	1.56488	0.716486	DMSO	-0.278824	1.99501	0.463187	Amp	2.39278	0.29931	0.779611	0.972764	Not_Sig		-0.147433
K562_RS00300	K562_RS00300	CP053300	71403	72815	No_name	ethanolamine permease	ethanolamine	eat	0.0798917	2.03915	0.479884	DMSO	0.277723	1.31959	0.410605	Amp	1.36592	-0.542539	0.616261	0.955832	Not_Sig		0.197831
K562_RS00305	K562_RS00305	CP053300	72955	74352	No_name	ethanolamine ammonia-lyase subunit EutB	Ethanolamine ammonia lyase large subunit	eutB	0.375579	1.33718	0.173371	DMSO	0.551259	1.35462	0.414318	Amp	5.71103	-0.677503	0.53525	0.94116	Not_Sig		0.17568
K562_RS00310	K562_RS00310	CP053300	74349	75146	No_name	ethanolamine ammonia-lyase subunit EutC	Belongs to the EutC family	eutC	0.194296	1.26209	0.278641	DMSO	0.318013	1.2829	0.211341	Amp	1.73829	-0.612726	0.57318	0.948571	Not_Sig		0.123717
K562_RS00315	K562_RS00315	CP053300	75139	76023	No_name	LysR family transcriptional regulator	LysR substrate binding domain	0	-0.814877	2.0454	0.323766	DMSO	-0.800211	2.02835	0.204765	Amp	2.50005	-0.0663105	0.950313	0.995107	Not_Sig		0.0146661
K562_RS00320	K562_RS00320	CP053300	76179	77801	No_name	MFS transporter	Major Facilitator Superfamily	0	-0.16693	2.5883	0.285558	DMSO	-0.203886	3.36008	0.36776	Amp	1.6586	0.137478	0.897295	0.984911	Not_Sig		-0.0369568
K562_RS00325	K562_RS00325	CP053300	77944	78372	No_name	pyridoxamine 5'-phosphate oxidase family protein	Pyridoxamine 5'-phosphate oxidase	0	-0.144349	2.58327	0.514086	DMSO	-0.426987	2.24241	0.165427	Amp	9.65741	0.906485	0.415948	0.915703	Not_Sig		-0.282638
K562_RS00330	K562_RS00330	CP053300	78694	80220	No_name	aldehyde dehydrogenase	belongs to the aldehyde dehydrogenase family	acoD	0.535762	0.666822	0.713788	DMSO	0.726875	0.589217	0.307027	Amp	5.40486	-0.426009	0.692025	0.963653	Not_Sig		0.191113
K562_RS00335	K562_RS00335	CP053300	80397	80945	No_name	hypothetical protein	pyridoxamine 5-phosphate	0	0.604885	1.33243	0.367816	DMSO	0.328798	1.29411	0.392493	Amp	1.13868	0.889004	0.424233	0.915703	Not_Sig		-0.276087
K562_RS00340	K562_RS00340	CP053300	81151	82167	No_name	helix-turn-helix domain-containing protein	PFAM helix-turn-helix- domain containing protein AraC type	0	0.3498	1.35936	0.18794	DMSO	0.347006	0.920685	0.283612	Amp	2.27725	0.0142256	0.989331	0.997945	Not_Sig		-0.00279437
K562_RS00345	K562_RS00345	CP053300	82262	83359	No_name	hypothetical protein	0	0	0.0867627	1.85011	0.819655	DMSO	0.222118	1.2606	0.401474	Amp	4.1682	-0.256867	0.809953	0.976318	Not_Sig		0.135355
K562_RS00350	K562_RS00350	CP053300	83356	85059	No_name	thiamine pyrophosphate-binding protein	Belongs to the TPP enzyme family	ilvG	-0.0604149	1.73467	0.226757	DMSO	0.0408814	1.52233	0.432529	Amp	3.6384	-0.359261	0.737562	0.967973	Not_Sig		0.101296
K562_RS00355	K562_RS00355	CP053300	85338	85799	No_name	hypothetical protein	0	0	1.10643	0.00213124	0.158271	DMSO	1.40285	0.000357847	0.0281282	Amp	31.6608	-3.19381	0.0330957	0.508385	Sig		0.296417
K562_RS00360	K562_RS00360	CP053300	85796	86080	No_name	type II toxin-antitoxin system mRNA interferase toxin	TIGRFAM addiction module toxin, RelE StbE family	0	1.437	0.00213124	2.17621	DMSO	-0.461148	0.000357847	1.41719	Amp	2.358	1.26596	0.274237	0.836	Not_Sig		-1.89814
K562_RS00365	K562_RS00365	CP053300	86238	87626	No_name	L-serine ammonia-lyase	L-Serine dehydratase	sdaA	-0.176245	1.45291	0.0740301	DMSO	-0.270454	1.37822	0.275895	Amp	13.889	0.571228	0.598409	0.951597	Not_Sig		-0.0942086
K562_RS00370	K562_RS00370	CP053300	87657	88799	No_name	alginate lyase family protein	Alginate lyase	0	0.499017	1.20261	0.28357	DMSO	0.180698	1.39362	0.282968	Amp	1.00426	1.37629	0.240756	0.814573	Not_Sig		-0.318319
K562_RS00375	K562_RS00375	CP053300	88951	91878	No_name	aminomethyl-transferring glycine dehydrogenase	The glycine cleavage system catalyzes the degradation of glycine. The P protein binds the alpha-amino group of glycine through its pyridoxal phosphate cofactor	gcvP	0.103311	1.33515	0.285975	DMSO	-0.0460609	1.59542	0.466762	Amp	2.664	0.472632	0.66111	0.960654	Not_Sig		-0.149372
K562_RS00380	K562_RS00380	CP053300	91937	92317	No_name	glycine cleavage system protein GcvH	The glycine cleavage system catalyzes the degradation of glycine. The H protein shuttles the methylamine group of glycine from the P protein to the T protein	gcvH	0.170278	2.32049	0.174191	DMSO	-0.645305	2.17523	0.209751	Amp	1.44997	5.18112	0.00660121	0.298012	Sig		-0.815583
K562_RS00385	K562_RS00385	CP053300	92444	93562	No_name	glycine cleavage system aminomethyltransferase GcvT	The glycine cleavage system catalyzes the degradation of glycine	gcvT	-0.0477289	1.4305	0.201021	DMSO	0.192879	1.80796	0.268905	Amp	1.78944	-1.24129	0.28232	0.842647	Not_Sig		0.240608
K562_RS00390	K562_RS00390	CP053300	94030	94392	No_name	hypothetical protein	0	0	-0.340196	2.02399	0.85748	DMSO	-0.168035	2.31895	0.637022	Amp	1.81192	-0.279151	0.793968	0.974972	Not_Sig		0.172161
K562_RS00395	K562_RS00395	CP053300	94596	95648	No_name	oxidoreductase	Oxidoreductase domain protein	0	0.0933726	1.58902	0.234475	DMSO	-0.115031	1.72197	0.284183	Amp	1.46893	0.979745	0.382685	0.894899	Not_Sig		-0.208403
K562_RS00400	K562_RS00400	CP053300	95950	96657	No_name	SGNH/GDSL hydrolase family protein	GDSL-like Lipase/Acylhydrolase family	0	0.463618	0.778268	2.26087	DMSO	-3.09474	0.371906	1.26026	Amp	3.21836	2.38111	0.0758974	0.657828	Not_Sig		-3.55836
K562_RS00405	K562_RS00405	CP053300	96968	99055	No_name	UvrD-helicase domain-containing protein	it can initiate unwinding at a nick in the DNA. It binds to the single-stranded DNA and acts in a progressive fashion along the DNA in the 3' to 5' direction	rep	0.42092	0.378742	0.317641	DMSO	0.360923	0.174813	0.259074	Amp	1.50323	0.253524	0.812361	0.976318	Not_Sig		-0.0599973
K562_RS00410	K562_RS00410	CP053300	99162	100049	No_name	cytochrome c5 family protein	PFAM cytochrome c, class I	0	0.155896	1.4256	0.542626	DMSO	0.653626	0.655859	0.266942	Amp	4.13207	-1.42558	0.227128	0.798929	Not_Sig		0.497729
K562_RS00420	K562_RS00420	CP053300	100431	101507	No_name	site-specific integrase	Belongs to the 'phage' integrase family	0	-0.0703619	1.38586	0.290834	DMSO	0.00758242	1.41811	0.193992	Amp	2.24762	-0.386171	0.719031	0.965921	Not_Sig		0.0779443
K562_RS00425	K562_RS00425	CP053300	101510	101782	No_name	hypothetical protein	#N/A	#N/A	-1.3782	1.78005	0.512479	DMSO	-0.383945	2.71684	0.0404145	Amp	160.797	NA	NA	NA	Not_tested		0.994257
K562_RS00430	K562_RS00430	CP053300	102202	104994	No_name	toprim domain-containing protein	Toprim domain	0	-0.0661299	1.3623	0.188707	DMSO	0.23145	1.18218	0.360145	Amp	3.64235	-1.26768	0.273684	0.836	Not_Sig		0.29758
K562_RS00445	K562_RS00445	CP053300	105815	106030	No_name	hypothetical protein	0	0	0.795394	0.211755	0.309122	DMSO	0.643495	1.121	0.513501	Amp	2.75945	0.438959	0.683361	0.963653	Not_Sig		-0.151899
K562_RS00460	K562_RS00460	CP053300	108844	109140	No_name	hypothetical protein	#N/A	#N/A	-1.04962	2.28762	1.56487	DMSO	-0.566229	2.62486	1.04478	Amp	2.24338	-0.444969	0.67936	0.963653	Not_Sig		0.483386
K562_RS00465	K562_RS00465	CP053300	109328	110398	No_name	phage late control D family protein	Phage late control gene D protein (GPD)	0	-0.183281	1.61344	0.334067	DMSO	-0.4403	1.77561	0.281694	Amp	1.4064	1.01874	0.36593	0.889894	Not_Sig		-0.257019
K562_RS00470	K562_RS00470	CP053300	110395	110826	No_name	phage tail protein	tail protein	0	-0.488182	2.3988	0.667825	DMSO	-1.99978	2.95058	1.33395	Amp	3.98982	1.75506	0.154104	0.734382	Not_Sig		-1.51159
K562_RS00475	K562_RS00475	CP053300	110849	113419	No_name	hypothetical protein	peptidase	0	0.157357	1.31306	0.283779	DMSO	0.0867947	1.48991	0.317627	Amp	1.25278	0.286941	0.788408	0.97348	Not_Sig		-0.0705621
K562_RS00480	K562_RS00480	CP053300	113435	113548	No_name	GpE family phage tail protein	Phage P2 GpE	0	-0.288314	1.67695	0.239388	DMSO	-0.154795	1.58761	0.651234	Amp	7.40066	-0.333308	0.755641	0.971069	Not_Sig		0.133519
K562_RS00485	K562_RS00485	CP053300	113557	113892	No_name	phage tail assembly protein	#N/A	#N/A	-0.287171	1.41018	0.559114	DMSO	-0.796107	1.71115	0.470598	Amp	1.41156	1.20621	0.294199	0.846189	Not_Sig		-0.508935
K562_RS00490	K562_RS00490	CP053300	114005	114514	No_name	phage major tail tube protein	major tail tube protein	0	-0.623629	2.19487	0.734752	DMSO	-0.39979	2.61599	0.785167	Amp	1.14194	-0.360538	0.736678	0.967973	Not_Sig		0.223839
K562_RS00495	K562_RS00495	CP053300	114543	115715	No_name	phage tail sheath protein	tail sheath protein	0	0.652933	0.650657	0.285794	DMSO	0.367806	1.06827	0.353658	Amp	1.5313	1.08611	0.338504	0.882201	Not_Sig		-0.285127
K562_RS00500	K562_RS00500	CP053300	115770	116495	No_name	tail fiber assembly protein	tail fiber assembly-like protein	0	-0.728952	2.38633	0.329947	DMSO	-0.728196	2.42504	0.342838	Amp	1.07967	-0.00275213	0.997936	0.999673	Not_Sig		0.000756049
K562_RS00505	K562_RS00505	CP053300	116511	119162	No_name	tail fiber protein	tail collar domain protein	0	0.109396	1.55813	0.27157	DMSO	0.0193649	1.46483	0.0938276	Amp	8.37727	0.542729	0.616142	0.955832	Not_Sig		-0.0900308
K562_RS00510	K562_RS00510	CP053300	119169	119711	No_name	phage tail protein I	Phage tail protein (Tail_P2_I)	0	-0.453724	2.00212	0.385204	DMSO	-0.221487	1.18236	0.401822	Amp	1.08814	-0.722641	0.509893	0.937074	Not_Sig		0.232238
K562_RS00515	K562_RS00515	CP053300	119704	120618	No_name	baseplate J/gp47 family protein	Baseplate assembly protein	0	0.376631	1.11924	0.398333	DMSO	0.56021	1.11779	0.526917	Amp	1.74981	-0.481379	0.655397	0.960654	Not_Sig		0.18358
K562_RS00520	K562_RS00520	CP053300	120615	120977	No_name	GPW/gp25 family protein	Gene 25-like lysozyme	0	-0.466567	2.58228	0.127538	DMSO	-0.123624	1.75936	0.434452	Amp	11.6039	-1.31187	0.259789	0.829138	Not_Sig		0.342942
K562_RS00525	K562_RS00525	CP053300	120974	121660	No_name	phage baseplate assembly protein V	Baseplate assembly	0	1.03872	0.0584986	0.193703	DMSO	1.41959	0.213571	0.215048	Amp	1.23254	-2.27931	0.0848515	0.669601	Not_Sig		0.380871
K562_RS00530	K562_RS00530	CP053300	122169	122618	No_name	phage tail protein	Bacteriophage P2 Tail completion protein	0	-0.11973	1.21709	0.371585	DMSO	-0.595252	1.06728	0.227921	Amp	2.65796	1.88941	0.13184	0.703306	Not_Sig		-0.475522
K562_RS00535	K562_RS00535	CP053300	122735	123175	No_name	protein lysB	regulatory protein	0	-0.384631	4.33193	0.0498328	DMSO	0.657743	0.953061	0.729821	Amp	214.487	NA	NA	NA	Not_tested		1.04237
K562_RS00540	K562_RS00540	CP053300	123172	124029	No_name	DUF3380 domain-containing protein	#N/A	#N/A	0.420187	1.50097	0.113014	DMSO	0.705908	1.17405	0.459792	Amp	16.5523	-1.04521	0.354928	0.886667	Not_Sig		0.285721
K562_RS00545	K562_RS00545	CP053300	124026	124292	No_name	phage holin family protein	Putative 3TM holin, Phage_holin_3	0	1.0374	0.00952408	0.0605071	DMSO	1.35572	0.196893	0.574338	Amp	90.0994	NA	NA	NA	Not_tested		0.318322
K562_RS00550	K562_RS00550	CP053300	124294	124638	No_name	membrane protein	Putative phage holin	0	0.923303	0.26833	0.626796	DMSO	1.21529	0.0275585	0.77783	Amp	1.53999	-0.506274	0.639294	0.960003	Not_Sig		0.291989
K562_RS00560	K562_RS00560	CP053300	125423	127042	No_name	TIGR04222 domain-containing membrane protein	phenylacetate-CoA ligase activity	0	0.151968	1.40591	0.494121	DMSO	-0.333606	1.77848	0.524046	Amp	1.12479	1.16768	0.307791	0.855794	Not_Sig		-0.485574
K562_RS00565	K562_RS00565	CP053300	127282	129225	No_name	glycosyltransferase family protein	repeat-containing protein	0	0.301788	1.24743	0.258077	DMSO	0.578845	0.712716	0.221239	Amp	1.36073	-1.41171	0.230883	0.804332	Not_Sig		0.277057
K562_RS00570	K562_RS00570	CP053300	129380	130522	No_name	DegT/DnrJ/EryC1/StrS family aminotransferase	Belongs to the DegT DnrJ EryC1 family	0	-0.190875	1.43412	0.216982	DMSO	-0.398537	1.82529	0.492062	Amp	5.14271	0.668825	0.540227	0.942121	Not_Sig		-0.207661
K562_RS00575	K562_RS00575	CP053300	130552	132894	No_name	tetratricopeptide repeat protein	Tetratricopeptide TPR_2 repeat protein	0	-0.16237	1.68791	0.177893	DMSO	0.409055	1.19992	0.514462	Amp	8.36348	-1.8182	0.143176	0.722568	Not_Sig		0.571425
K562_RS00580	K562_RS00580	CP053300	133151	133348	No_name	hypothetical protein	Flagellar protein FliT	0	0.979452	0.285181	0.470534	DMSO	1.02883	0.055312	0.17318	Amp	7.38224	-0.170578	0.872836	0.981699	Not_Sig		0.0493788
K562_RS00585	K562_RS00585	CP053300	133374	134882	No_name	flagellar filament capping protein FliD	Required for morphogenesis and for the elongation of the flagellar filament by facilitating polymerization of the flagellin monomers at the tip of growing filament. Forms a capping structure, which prevents flagellin subunits (transported through the central channel of the flagellum) from leaking out without polymerization at the distal end	fliD	-0.0387577	1.46786	0.251208	DMSO	-0.456298	1.69681	0.246261	Amp	1.04058	2.05583	0.108967	0.683949	Not_Sig		-0.417541
K562_RS00590	K562_RS00590	CP053300	135015	136169	No_name	flagellin	Flagellin is the subunit protein which polymerizes to form the filaments of bacterial flagella	fliC	0.0833173	1.2721	0.328099	DMSO	0.377266	1.15127	0.448795	Amp	1.87105	-0.915814	0.411581	0.915072	Not_Sig		0.293949
K562_RS00600	K562_RS00600	CP053300	137079	139202	No_name	TonB-dependent receptor	siderophore receptor	0	0.465844	1.13178	0.244049	DMSO	0.383871	1.01698	0.370905	Amp	2.30978	0.319783	0.765139	0.972764	Not_Sig		-0.0819733
K562_RS00605	K562_RS00605	CP053300	139432	140667	No_name	PepSY domain-containing protein	PFAM PepSY-associated TM helix domain protein	0	0.559183	1.18073	0.506825	DMSO	0.979059	0.883116	0.483443	Amp	1.09907	-1.0383	0.357771	0.886667	Not_Sig		0.419876
K562_RS00610	K562_RS00610	CP053300	140752	141354	No_name	DNA-3-methyladenine glycosylase I	Pfam Methyladenine glycosylase	tag	-0.255464	1.77894	0.391731	DMSO	-0.313502	2.22273	0.33107	Amp	1.40003	0.195997	0.854167	0.981647	Not_Sig		-0.0580384
K562_RS00615	K562_RS00615	CP053300	141496	142377	No_name	ATPase	PFAM ATPase, BadF BadG BcrA BcrD type	0	-0.378929	2.01866	0.547903	DMSO	-0.138827	1.8145	1.31245	Amp	5.73801	-0.292407	0.784516	0.972764	Not_Sig		0.240102
K562_RS00620	K562_RS00620	CP053300	142517	143341	No_name	Cof-type HAD-IIB family hydrolase	Haloacid dehalogenase domain protein hydrolase, type 3	0	0.859545	0.842016	0.149735	DMSO	0.795883	1.23361	0.220708	Amp	2.17267	0.413436	0.700491	0.963803	Not_Sig		-0.0636622
K562_RS00625	K562_RS00625	CP053300	143481	144224	No_name	aquaporin Z	Channel that permits osmotically driven movement of water in both directions. It is involved in the osmoregulation and in the maintenance of cell turgor during volume expansion in rapidly growing cells. It mediates rapid entry or exit of water in response to abrupt changes in osmolarity	aqpZ	0.372648	1.45942	0.290485	DMSO	0.493551	1.32604	0.144773	Amp	4.02597	-0.645209	0.553935	0.944085	Not_Sig		0.120903
K562_RS00630	K562_RS00630	CP053300	144524	144820	No_name	H-NS histone family protein	PFAM histone family protein nucleoid-structuring protein H-NS	0	0.263078	1.36218	0.164812	DMSO	-0.113613	1.73863	0.163253	Amp	1.01918	2.81252	0.0481934	0.579426	Sig		-0.376691
K562_RS00635	K562_RS00635	CP053300	144924	145988	No_name	glycosyltransferase family 4 protein	PFAM glycosyl transferase group 1	0	0.450899	1.42555	0.413184	DMSO	0.652954	0.919319	0.0868146	Amp	22.6518	-0.828906	0.453755	0.921271	Not_Sig		0.202055
K562_RS00640	K562_RS00640	CP053300	146304	146654	No_name	hypothetical protein	#N/A	#N/A	1.09711	0.291793	0.0694994	DMSO	1.01168	0.967927	0.586398	Amp	71.1907	NA	NA	NA	Not_tested		-0.085424
K562_RS00645	K562_RS00645	CP053300	146620	146973	No_name	flagellar transcriptional regulator FlhD	#N/A	#N/A	-0.345798	2.20707	0.138747	DMSO	0.0625813	1.84558	0.326683	Amp	5.54382	-1.99291	0.117061	0.692994	Not_Sig		0.40838
K562_RS00650	K562_RS00650	CP053300	147066	147620	No_name	flagellar transcriptional regulator FlhC	Functions in complex with FlhD as a master transcriptional regulator that regulates transcription of several flagellar and non-flagellar operons by binding to their promoter region. Activates expression of class 2 flagellar genes, including fliA, which is a flagellum-specific sigma factor that turns on the class 3 genes. Also regulates genes whose products function in a variety of physiological p…	flhC	0.180622	1.79816	0.272982	DMSO	0.410022	1.59273	0.233441	Amp	1.36746	-1.1062	0.330689	0.875135	Not_Sig		0.229399
K562_RS00655	K562_RS00655	CP053300	147801	148661	No_name	flagellar motor stator protein MotA	With MotB forms the ion channels that couple flagellar rotation to proton sodium motive force across the membrane and forms the stator elements of the rotary flagellar machine	motA	-0.0117377	1.82457	0.481967	DMSO	0.429387	1.73372	0.103762	Amp	21.5754	-1.54977	0.196129	0.767647	Not_Sig		0.441124
K562_RS00660	K562_RS00660	CP053300	148675	149694	No_name	flagellar motor protein MotB	PFAM OmpA MotB domain protein	motB	-0.046775	1.29128	0.320969	DMSO	-0.10861	1.26646	0.557936	Amp	3.02165	0.166392	0.87592	0.982569	Not_Sig		-0.0618354
K562_RS00665	K562_RS00665	CP053300	149719	150096	No_name	response regulator	Pfam Response regulator receiver	cheY1	0.841418	0.5923	0.227654	DMSO	1.12344	1.32604	0.540719	Amp	5.64145	-0.832595	0.451896	0.921271	Not_Sig		0.282021
K562_RS00670	K562_RS00670	CP053300	150130	152397	No_name	chemotaxis protein CheA	Signal transducing histidine kinase homodimeric	cheA	1.44901	0.262155	0.239757	DMSO	1.32392	0.15829	0.121537	Amp	3.8916	0.805994	0.465433	0.925861	Not_Sig		-0.125085
K562_RS00675	K562_RS00675	CP053300	152445	152960	No_name	chemotaxis protein CheW	chemotaxis protein	cheW	1.07606	0.366162	0.256974	DMSO	1.54401	0.395287	0.608937	Amp	5.61521	-1.22631	0.287336	0.844936	Not_Sig		0.467951
K562_RS00680	K562_RS00680	CP053300	152998	154956	No_name	Tar ligand binding domain-containing protein	histidine kinase HAMP region domain protein	0	1.07276	0.7809	0.517073	DMSO	1.16886	0.982577	0.218789	Amp	5.58536	-0.296465	0.781631	0.972764	Not_Sig		0.096101
K562_RS00685	K562_RS00685	CP053300	154960	155952	No_name	chemotaxis protein CheR	Methylation of the membrane-bound methyl-accepting chemotaxis proteins (MCP) to form gamma-glutamyl methyl ester residues in MCP	cheR	0.116559	1.49356	0.172787	DMSO	0.520035	1.51928	0.102514	Amp	2.84089	-3.4784	0.0253888	0.483953	Sig		0.403476
K562_RS00690	K562_RS00690	CP053300	155949	156707	No_name	chemoreceptor glutamine deamidase CheD	Probably deamidates glutamine residues to glutamate on methyl-accepting chemotaxis receptors (MCPs), playing an important role in chemotaxis	cheD	1.48765	0.082115	0.151189	DMSO	1.60313	0.184851	0.298451	Amp	3.89679	-0.597849	0.582143	0.948571	Not_Sig		0.11548
K562_RS00695	K562_RS00695	CP053300	156704	157795	No_name	chemotaxis response regulator protein-glutamate methylesterase	catalyzes the demethylation of specific methylglutamate residues introduced into the chemoreceptors (methyl-accepting chemotaxis proteins) by CheR	cheB	-0.587929	1.72804	0.364873	DMSO	-0.041721	1.79779	0.287544	Amp	1.61018	-2.03647	0.111389	0.687936	Not_Sig		0.546208
K562_RS00700	K562_RS00700	CP053300	157863	158258	No_name	chemotaxis response regulator CheY	Chemotaxis regulator that, when phosphorylated, interacts with the flagellar motor causing the flagella to spin clockwise which causes the cell to tumble	cheY	-0.419284	1.3151	0.335401	DMSO	-0.219075	1.28346	0.146216	Amp	5.26187	-0.947759	0.396919	0.907025	Not_Sig		0.200209
K562_RS00705	K562_RS00705	CP053300	158261	158992	No_name	protein phosphatase CheZ	Plays an important role in bacterial chemotaxis signal transduction pathway by accelerating the dephosphorylation of phosphorylated CheY (CheY-P)	cheZ	0.316224	1.00418	0.590908	DMSO	0.0300377	1.6208	0.665211	Amp	1.2673	0.557104	0.607157	0.955832	Not_Sig		-0.286187
K562_RS00710	K562_RS00710	CP053300	159252	159755	No_name	DUF2844 domain-containing protein	Protein of unknown function (DUF2844)	0	1.53061	0.41997	0.229837	DMSO	1.18981	0.231315	0.182486	Amp	1.58629	2.01138	0.114618	0.690651	Not_Sig		-0.340801
K562_RS00715	K562_RS00715	CP053300	159772	161010	No_name	DUF3443 family protein	#N/A	#N/A	-0.310003	1.27444	0.202215	DMSO	-0.0875361	1.23876	0.563312	Amp	7.76021	-0.643807	0.554757	0.944872	Not_Sig		0.222467
K562_RS00720	K562_RS00720	CP053300	161174	161671	No_name	VOC family protein	3-demethylubiquinone-9 3-methyltransferase	0	-2.09954	1.74485	0.64393	DMSO	-1.57238	2.15157	1.20776	Amp	3.51792	-0.667103	0.541218	0.942121	Not_Sig		0.527158
K562_RS00725	K562_RS00725	CP053300	162100	163299	No_name	flagellar type III secretion system protein FlhB	Required for formation of the rod structure in the basal body of the flagellar apparatus. Together with FliI and FliH, may constitute the export apparatus of flagellin	flhB	-0.10201	1.51869	0.314285	DMSO	0.222038	1.83584	0.430778	Amp	1.87871	-1.05256	0.351924	0.886667	Not_Sig		0.324048
K562_RS00730	K562_RS00730	CP053300	163296	165398	No_name	flagellar biosynthesis protein FlhA	Required for formation of the rod structure of the flagellar apparatus. Together with FliI and FliH, may constitute the export apparatus of flagellin	flhA	-0.067498	1.75862	0.248834	DMSO	0.423393	1.77933	0.288612	Amp	1.34527	-2.2312	0.0894912	0.669601	Not_Sig		0.490891
K562_RS00735	K562_RS00735	CP053300	165395	167194	No_name	flagellar biosynthesis protein FlhF	PFAM GTP-binding signal recognition particle SRP54 G- domain	flhF	0.58228	1.6563	0.0701684	DMSO	0.867762	0.602897	0.363822	Amp	26.8841	-1.33451	0.252937	0.827362	Not_Sig		0.285483
K562_RS00740	K562_RS00740	CP053300	167187	168005	No_name	flagellar biosynthesis protein FlhG	Belongs to the ParA family	flhG	0.570071	0.712601	0.116543	DMSO	0.169588	1.0647	0.347321	Amp	8.88161	1.89341	0.131233	0.703306	Not_Sig		-0.400483
K562_RS00745	K562_RS00745	CP053300	168028	168762	No_name	RNA polymerase sigma factor FliA	Sigma factors are initiation factors that promote the attachment of RNA polymerase to specific initiation sites and are then released. This sigma factor controls the expression of flagella-related genes	fliA	0.4456	1.23352	0.337496	DMSO	0.726148	1.16668	0.14454	Amp	5.45207	-1.32352	0.256241	0.827997	Not_Sig		0.280548
K562_RS00750	K562_RS00750	CP053300	169014	170432	No_name	adenosylhomocysteinase	May play a key role in the regulation of the intracellular concentration of adenosylhomocysteine	ahcY	-1.69213	2.14294	0.533812	DMSO	-1.82662	1.61425	0.656658	Amp	1.51322	0.275274	0.796741	0.974972	Not_Sig		-0.134495
K562_RS00755	K562_RS00755	CP053300	170541	170894	No_name	phage holin family protein	PFAM membrane protein of	0	0.0392947	1.06239	0.39949	DMSO	-0.186366	1.3901	0.381293	Amp	1.09773	0.707755	0.518156	0.939537	Not_Sig		-0.225661
K562_RS00760	K562_RS00760	CP053300	170925	171755	No_name	methylenetetrahydrofolate reductase [NAD(P)H]	Methylenetetrahydrofolate reductase	metF	1.06044	0.48998	0.652807	DMSO	-0.0948246	2.21122	0.714712	Amp	1.19865	2.06719	0.107572	0.683949	Not_Sig		-1.15527
K562_RS00765	K562_RS00765	CP053300	171858	173336	No_name	6-aminohexanoate-cyclic-dimer hydrolase	#N/A	#N/A	0.466788	1.04632	0.319945	DMSO	0.345237	1.13626	0.341351	Amp	1.13829	0.450001	0.67602	0.963653	Not_Sig		-0.121552
K562_RS00770	K562_RS00770	CP053300	173417	174109	No_name	dienelactone hydrolase family protein	Carboxymethylenebutenolidase	0	0.405292	0.906273	0.371223	DMSO	-0.071035	1.62682	0.152883	Amp	5.89591	2.05499	0.10907	0.683949	Not_Sig		-0.476327
K562_RS00775	K562_RS00775	CP053300	174334	175416	No_name	nitronate monooxygenase	PFAM 2-nitropropane dioxygenase NPD	0	-0.296787	1.4827	0.595999	DMSO	0.639096	0.131949	0.606214	Amp	1.03457	-1.90678	0.129225	0.703306	Not_Sig		0.935882
K562_RS00780	K562_RS00780	CP053300	175855	176997	No_name	branched-chain amino acid ABC transporter substrate-binding protein	amino acid	0	-0.297903	1.97127	0.301397	DMSO	-0.355467	1.98278	0.197941	Amp	2.3185	0.276508	0.795857	0.974972	Not_Sig		-0.0575643
K562_RS00785	K562_RS00785	CP053300	177087	178304	No_name	MFS transporter	PFAM major facilitator superfamily MFS_1	0	0.992528	0.640957	0.156398	DMSO	0.648991	1.14384	0.320057	Amp	4.18787	1.67036	0.17017	0.750196	Not_Sig		-0.343537
K562_RS00790	K562_RS00790	CP053300	178537	179196	No_name	pyridoxamine 5'-phosphate oxidase family protein	Pfam Pyridoxamine 5'-phosphate	0	-0.132123	1.54626	0.0764972	DMSO	-0.30462	1.89644	0.10513	Amp	1.8887	2.29796	0.0831251	0.663216	Not_Sig		-0.172496
K562_RS00795	K562_RS00795	CP053300	179553	179846	No_name	H-NS histone family protein	Histone family protein nucleoid-structuring protein H-NS	0	-1.44413	2.66782	0.380119	DMSO	-0.776977	2.09704	0.661228	Amp	3.02596	-1.51507	0.20433	0.7772	Not_Sig		0.667154
K562_RS00800	K562_RS00800	CP053300	180103	181260	No_name	cation transporter	Belongs to the cation diffusion facilitator (CDF) transporter (TC 2.A.4) family	0	0.477895	1.87475	0.0824676	DMSO	0.68321	1.43553	0.229351	Amp	7.73452	-1.45908	0.218307	0.788611	Not_Sig		0.205315
K562_RS00805	K562_RS00805	CP053300	181312	181782	No_name	Lrp/AsnC ligand binding domain-containing protein	#N/A	#N/A	0.0193172	0.988227	0.211813	DMSO	0.680037	0.828963	0.567445	Amp	7.177	-1.88942	0.131839	0.703306	Not_Sig		0.660719
K562_RS00810	K562_RS00810	CP053300	181862	182521	No_name	exonuclease	DNA polymerase III is a complex, multichain enzyme responsible for most of the replicative synthesis in bacteria. The epsilon subunit contain the editing function and is a proofreading 3'-5' exonuclease	0	0.406958	1.14308	0.175255	DMSO	0.146228	1.20246	0.168244	Amp	1.08508	1.85888	0.136577	0.710837	Not_Sig		-0.26073
K562_RS00815	K562_RS00815	CP053300	182518	183162	No_name	MBL fold metallo-hydrolase	PFAM beta-lactamase domain protein	0	0.547503	1.14291	0.0931467	DMSO	0.288361	1.09746	0.213111	Amp	5.2345	1.92988	0.125833	0.701791	Not_Sig		-0.259142
K562_RS00820	K562_RS00820	CP053300	183818	184429	No_name	septal ring lytic transglycosylase RlpA family protein	Lytic transglycosylase with a strong preference for naked glycan strands that lack stem peptides	rlpA	0.799543	0.696787	0.190423	DMSO	0.675373	1.30319	0.326419	Amp	2.93842	0.569113	0.599714	0.95188	Not_Sig		-0.12417
K562_RS00825	K562_RS00825	CP053300	184508	185395	No_name	16S rRNA (cytidine(1402)-2'-O)-methyltransferase	Catalyzes the 2'-O-methylation of the ribose of cytidine 1402 (C1402) in 16S rRNA	rsmI	-1.16643	2.05373	0.402488	DMSO	-0.561094	1.86755	0.195937	Amp	4.21964	-2.34219	0.0791883	0.657828	Not_Sig		0.605338
K562_RS00830	K562_RS00830	CP053300	185442	185870	No_name	YraN family protein	#N/A	#N/A	-0.605278	2.22776	0.341709	DMSO	-0.305959	1.81508	0.84828	Amp	6.16263	-0.566895	0.601084	0.952014	Not_Sig		0.299319
K562_RS00835	K562_RS00835	CP053300	185997	186581	No_name	SIS domain-containing protein	Catalyzes the isomerization of sedoheptulose 7-phosphate in D-glycero-D-manno-heptose 7-phosphate	gmhA	0.838418	0.156835	0.321066	DMSO	0.577567	0.287678	0.614733	Amp	3.66593	0.651464	0.550281	0.943245	Not_Sig		-0.260851
K562_RS00840	K562_RS00840	CP053300	186599	187399	No_name	BON domain-containing protein	PFAM transport-associated	0	0.124608	1.23237	0.248927	DMSO	0.38654	0.911365	0.307383	Amp	1.52481	-1.147	0.315326	0.863424	Not_Sig		0.261932
K562_RS00845	K562_RS00845	CP053300	187396	187758	No_name	c-type cytochrome	cytochrome C	0	-1.0121	1.39379	1.02054	DMSO	-1.15153	1.72283	0.738799	Amp	1.90812	0.191685	0.857326	0.981647	Not_Sig		-0.139432
K562_RS00850	K562_RS00850	CP053300	187825	187900	No_name	tRNA-Ala	#N/A	#N/A	1.58267	0.0513796	0.432986	DMSO	1.17836	0.0101939	0.148121	Amp	8.54504	1.53026	0.200698	0.773171	Not_Sig		-0.404306
K562_RS00855	K562_RS00855	CP053300	188790	189767	No_name	replication initiator protein A	Replication initiator protein A	0	0.0955652	1.70111	0.0490255	DMSO	0.157616	1.6849	0.0643337	Amp	1.722	-1.32876	0.254661	0.827997	Not_Sig		0.0620512
K562_RS00860	K562_RS00860	CP053300	190082	190435	No_name	hypothetical protein	#N/A	#N/A	-0.113393	1.74854	0.27313	DMSO	0.078924	1.74343	0.144144	Amp	3.5904	-1.07859	0.341472	0.883794	Not_Sig		0.192317
K562_RS00865	K562_RS00865	CP053300	190553	191245	No_name	hypothetical protein	0	0	-0.194679	1.45612	0.173389	DMSO	0.147406	1.47601	0.251726	Amp	2.10773	-1.93844	0.1246	0.701791	Not_Sig		0.342086
K562_RS00870	K562_RS00870	CP053300	191366	191617	No_name	hypothetical protein	0	0	-0.0679407	1.64646	0.441118	DMSO	-0.033089	1.34335	0.135962	Amp	10.5262	-0.130774	0.902267	0.984911	Not_Sig		0.0348517
K562_RS00875	K562_RS00875	CP053300	191595	191987	No_name	TraK family protein	#N/A	#N/A	0.0904338	1.1202	0.162658	DMSO	0.154519	1.22592	0.17485	Amp	1.15552	-0.464801	0.666248	0.96079	Not_Sig		0.0640853
K562_RS00880	K562_RS00880	CP053300	192330	192692	No_name	conjugal transfer transcriptional regulator TraJ	0	0	-0.247102	1.60611	0.138152	DMSO	-0.3532	1.75792	0.044465	Amp	9.65337	1.26621	0.274157	0.836	Not_Sig		-0.106098
K562_RS00885	K562_RS00885	CP053300	192819	193592	No_name	P-type conjugative transfer protein TrbJ	TRANSFER protein	0	-0.00754241	1.42888	0.121857	DMSO	0.0120251	1.57215	0.132007	Amp	1.17353	-0.188653	0.85955	0.981647	Not_Sig		0.0195675
K562_RS00890	K562_RS00890	CP053300	193602	193793	No_name	hypothetical protein	#N/A	#N/A	-0.211327	1.81116	0.183648	DMSO	-0.112955	1.29145	0.0771556	Amp	5.66551	-0.855362	0.440561	0.918354	Not_Sig		0.0983724
K562_RS00895	K562_RS00895	CP053300	193813	195240	No_name	P-type conjugative transfer protein TrbL	TrbL/VirB6 plasmid conjugal transfer protein	0	-0.0836209	1.62469	0.0890092	DMSO	-0.0882098	1.64464	0.102294	Amp	1.32077	0.0586166	0.956069	0.995162	Not_Sig		-0.00458892
K562_RS00900	K562_RS00900	CP053300	195305	195595	No_name	type I toxin-antitoxin system ptaRNA1 family toxin	#N/A	#N/A	0.239945	1.09969	0.0999856	DMSO	0.31626	1.1172	0.162556	Amp	2.64321	-0.692609	0.526664	0.940833	Not_Sig		0.0763145
K562_RS00905	K562_RS00905	CP053300	195586	195945	No_name	HigA family addiction module antidote protein	#N/A	#N/A	-0.120415	1.49606	0.177855	DMSO	-0.165243	1.62589	0.0678826	Amp	6.86464	0.407857	0.704265	0.965336	Not_Sig		-0.0448275
K562_RS00910	K562_RS00910	CP053300	196041	196244	No_name	pirin	#N/A	#N/A	0.0135147	1.31368	0.239854	DMSO	-0.140417	1.33051	0.0622425	Amp	14.8498	1.07595	0.34252	0.884321	Not_Sig		-0.153932
K562_RS00915	K562_RS00915	CP053300	196548	197360	No_name	DNA adenine methylase	#N/A	#N/A	-2.38519	1.63788	0.173004	DMSO	-2.3926	1.73144	0.111792	Amp	2.39494	0.0623089	0.953306	0.995107	Not_Sig		-0.00740995
K562_RS00920	K562_RS00920	CP053300	197343	199889	No_name	nucleoside triphosphate pyrophosphohydrolase	#N/A	#N/A	-0.0541788	1.64123	0.167423	DMSO	-0.0114577	1.68045	0.126922	Amp	1.74002	-0.352199	0.742462	0.967973	Not_Sig		0.0427211
K562_RS00925	K562_RS00925	CP053300	199979	200689	No_name	hypothetical protein	#N/A	#N/A	-0.0196152	1.57511	0.108702	DMSO	0.0197269	1.53268	0.166767	Amp	2.35369	-0.342311	0.749347	0.967973	Not_Sig		0.0393421
K562_RS00930	K562_RS00930	CP053300	200682	201167	No_name	hypothetical protein	#N/A	#N/A	-0.55246	1.85348	0.108425	DMSO	-0.458601	1.92337	0.180243	Amp	2.76352	-0.772884	0.482724	0.930054	Not_Sig		0.0938595
K562_RS00935	K562_RS00935	CP053300	201654	202781	No_name	site-specific integrase	Belongs to the 'phage' integrase family	0	-0.0914079	1.51068	0.175195	DMSO	0.00106239	1.39793	0.0982272	Amp	3.18113	-0.797415	0.469867	0.926573	Not_Sig		0.0924703
K562_RS00940	K562_RS00940	CP053300	203010	204407	No_name	glucarate dehydratase	mandelate racemase muconate lactonizing	0	0.0505146	1.72514	0.260304	DMSO	0.327012	1.43588	0.18786	Amp	1.91996	-1.49186	0.21001	0.777461	Not_Sig		0.276498
K562_RS00945	K562_RS00945	CP053300	204470	205810	No_name	MFS transporter	Major facilitator superfamily MFS_1	0	0.578138	1.24437	0.235139	DMSO	0.223994	1.38726	0.167358	Amp	1.97404	2.12531	0.100738	0.680788	Not_Sig		-0.354145
K562_RS00950	K562_RS00950	CP053300	206025	206999	No_name	LysR family transcriptional regulator	LysR substrate binding domain	0	0.95911	0.887703	0.453093	DMSO	0.937953	0.417713	0.280132	Amp	2.61608	0.0687913	0.948457	0.995107	Not_Sig		-0.021157
K562_RS00955	K562_RS00955	CP053300	207040	207771	No_name	glutathione S-transferase	Glutathione S-transferase, C-terminal domain	0	0.387597	1.3669	0.376599	DMSO	0.276172	1.42932	0.540996	Amp	2.06362	0.292784	0.784248	0.972764	Not_Sig		-0.111425
K562_RS00960	K562_RS00960	CP053300	207898	208530	No_name	DUF2239 family protein	Uncharacterized protein conserved in bacteria (DUF2239)	0	0.354906	1.29226	0.166377	DMSO	-0.15469	1.56105	0.465404	Amp	7.82475	1.78583	0.14867	0.725963	Not_Sig		-0.509596
K562_RS00965	K562_RS00965	CP053300	208546	209883	No_name	carotenoid oxygenase family protein	dioxygenase	0	-0.428714	2.1187	0.0814708	DMSO	-0.264061	2.07742	0.340645	Amp	17.4823	-0.814235	0.461206	0.924318	Not_Sig		0.164653
K562_RS00970	K562_RS00970	CP053300	209897	211063	No_name	ABC transporter permease	MacB-like periplasmic core domain	0	0.0913366	1.54678	0.200156	DMSO	0.122558	1.3636	0.23871	Amp	1.42235	-0.173589	0.870619	0.981699	Not_Sig		0.0312212
K562_RS00975	K562_RS00975	CP053300	211072	212226	No_name	ABC transporter permease	MacB-like periplasmic core domain	0	-0.661262	1.64982	0.356607	DMSO	-0.62285	1.77042	0.555022	Amp	2.42236	-0.100847	0.924524	0.989739	Not_Sig		0.0384111
K562_RS00980	K562_RS00980	CP053300	212248	212946	No_name	ABC transporter ATP-binding protein	abc transporter	0	0.0745695	1.36072	0.260275	DMSO	0.439153	1.63923	0.409081	Amp	2.47032	-1.30239	0.262711	0.830726	Not_Sig		0.364583
K562_RS00985	K562_RS00985	CP053300	212952	214157	No_name	efflux RND transporter periplasmic adaptor subunit	Belongs to the membrane fusion protein (MFP) (TC 8.A.1) family	0	0.0259588	1.68171	0.254576	DMSO	-0.333436	1.78646	0.193321	Amp	1.7341	1.94736	0.12333	0.701324	Not_Sig		-0.359395
K562_RS00990	K562_RS00990	CP053300	214516	214749	No_name	hypothetical protein	#N/A	#N/A	-0.567845	2.09792	0.220939	DMSO	-0.650027	2.51397	0.352157	Amp	2.54057	0.342397	0.749287	0.967973	Not_Sig		-0.082182
K562_RS00995	K562_RS00995	CP053300	214830	215600	No_name	Mut7-C ubiquitin/RNAse domain-containing protein	Mut7-C RNAse domain	0	1.2536	0.0615714	0.17003	DMSO	1.2872	0.0780891	0.162889	Amp	1.0896	-0.247183	0.816936	0.976858	Not_Sig		0.0336033
K562_RS01000	K562_RS01000	CP053300	215697	216566	No_name	NAD(P)-dependent oxidoreductase	6-phosphogluconate dehydrogenase, NAD-binding	0	1.27636	0.3534	0.447997	DMSO	0.872988	0.417904	0.525974	Amp	1.37841	1.01123	0.369107	0.891107	Not_Sig		-0.403374
K562_RS01005	K562_RS01005	CP053300	216640	217275	No_name	LysE family translocator	PFAM Lysine exporter protein (LYSE YGGA)	0	0.236998	1.44428	0.07249	DMSO	-0.159582	1.8081	0.322394	Amp	19.7796	2.07872	0.106177	0.683949	Not_Sig		-0.39658
K562_RS01010	K562_RS01010	CP053300	217367	218650	No_name	MFS transporter	Major facilitator Superfamily	0	0.627142	1.23196	0.0727239	DMSO	0.786994	0.807494	0.201156	Amp	7.65089	-1.29441	0.265196	0.832015	Not_Sig		0.159852
K562_RS01015	K562_RS01015	CP053300	218748	219677	No_name	LysR family transcriptional regulator	regulatory protein LysR	0	-0.133384	1.33507	0.171406	DMSO	-0.364364	1.78654	0.209893	Amp	1.49949	1.47633	0.213901	0.784561	Not_Sig		-0.230979
K562_RS01020	K562_RS01020	CP053300	219862	220695	No_name	OmpW family protein	PFAM OmpW family protein	0	0.322703	1.5654	0.298729	DMSO	0.314577	1.58389	0.295994	Amp	1.01856	0.033468	0.974905	0.997585	Not_Sig		-0.00812595
K562_RS01025	K562_RS01025	CP053300	220714	221955	No_name	DUF2957 domain-containing protein	Protein of unknown function (DUF2957)	0	-0.207259	2.02022	0.360397	DMSO	-0.197844	1.57055	0.310137	Amp	1.35038	-0.0342973	0.974283	0.997585	Not_Sig		0.00941504
K562_RS01030	K562_RS01030	CP053300	222104	223336	No_name	DUF2957 domain-containing protein	Protein of unknown function (DUF2957)	0	0.508577	1.15154	0.168899	DMSO	0.409324	1.17948	0.237943	Amp	1.98467	0.589156	0.587422	0.948571	Not_Sig		-0.0992536
K562_RS01035	K562_RS01035	CP053300	223970	224920	No_name	N-acetyl-gamma-glutamyl-phosphate reductase	Catalyzes the NADPH-dependent reduction of N-acetyl-5- glutamyl phosphate to yield N-acetyl-L-glutamate 5-semialdehyde	argC	0.0919441	1.34067	0.34463	DMSO	0.473728	1.02824	0.470512	Amp	1.86395	-1.13382	0.320217	0.865299	Not_Sig		0.381784
K562_RS01040	K562_RS01040	CP053300	225112	225684	No_name	flavodoxin family protein	flavodoxin nitric oxide synthase	0	-1.3242	2.84685	0.363585	DMSO	-0.776994	2.07594	0.159623	Amp	5.18826	-2.38689	0.0754222	0.657828	Not_Sig		0.547207
K562_RS01045	K562_RS01045	CP053300	225899	226495	No_name	YbhB/YbcL family Raf kinase inhibitor-like protein	Phosphatidylethanolamine-binding protein	0	0.422429	0.927878	0.217963	DMSO	0.505905	1.46808	0.395085	Amp	3.28561	-0.320431	0.764683	0.972764	Not_Sig		0.0834763
K562_RS01050	K562_RS01050	CP053300	226736	227422	No_name	orotate phosphoribosyltransferase	Catalyzes the transfer of a ribosyl phosphate group from 5-phosphoribose 1-diphosphate to orotate, leading to the formation of orotidine monophosphate (OMP)	pyrE	-1.21776	1.19684	0.430507	DMSO	-1.14794	1.23293	0.167194	Amp	6.63005	-0.261848	0.80637	0.975481	Not_Sig		0.069819
K562_RS01055	K562_RS01055	CP053300	227883	230153	No_name	NADP-dependent malic enzyme	Belongs to the malic enzymes family	maeB	0.118403	1.81633	0.155023	DMSO	0.262502	1.61622	0.0482697	Amp	10.3144	-1.5372	0.199059	0.77044	Not_Sig		0.144099
K562_RS01060	K562_RS01060	CP053300	230302	233892	No_name	indolepyruvate ferredoxin oxidoreductase family protein	oxidoreductase	porG	0.246857	1.3784	0.0167914	DMSO	0.209902	1.49142	0.135296	Amp	64.9219	NA	NA	NA	Not_tested		-0.0369552
K562_RS01065	K562_RS01065	CP053300	234222	234416	No_name	hypothetical protein	0	0	0.216598	0.123868	0.479814	DMSO	0.511389	4.16e-05	0.00786827	Amp	3718.66	NA	NA	NA	Not_tested		0.294791
K562_RS01070	K562_RS01070	CP053300	234550	235647	No_name	4-hydroxyphenylpyruvate dioxygenase	4-Hydroxyphenylpyruvate dioxygenase	hppD	-0.210388	1.96795	0.364745	DMSO	-0.18533	1.68081	0.371053	Amp	1.03488	-0.0834137	0.93753	0.992936	Not_Sig		0.0250574
K562_RS01075	K562_RS01075	CP053300	235862	236386	No_name	Lrp/AsnC family transcriptional regulator	PFAM regulatory protein AsnC Lrp family	0	0.394102	0.983098	0.260533	DMSO	0.135086	1.52407	0.229524	Amp	1.28846	1.29208	0.265925	0.832015	Not_Sig		-0.259016
K562_RS01080	K562_RS01080	CP053300	236453	237100	No_name	GNAT family N-acetyltransferase	PFAM GCN5-related N-acetyltransferase	0	0.233894	0.860697	0.203785	DMSO	0.369354	1.23732	0.199087	Amp	1.04774	-0.823546	0.456466	0.922405	Not_Sig		0.135459
K562_RS01085	K562_RS01085	CP053300	237335	237940	No_name	TetR family transcriptional regulator	PFAM regulatory protein TetR	0	-0.149256	1.89529	0.391654	DMSO	-0.0588802	1.74577	0.372226	Amp	1.10711	-0.289709	0.786436	0.97348	Not_Sig		0.0903759
K562_RS01090	K562_RS01090	CP053300	237954	238775	No_name	DUF1835 domain-containing protein	Protein of unknown function	0	-0.233846	1.55091	0.404521	DMSO	-0.465853	1.65766	0.408581	Amp	1.02018	0.69892	0.523107	0.940778	Not_Sig		-0.232008
K562_RS01095	K562_RS01095	CP053300	238903	239991	No_name	phenylacetate-CoA oxygenase/reductase subunit PaaK	TIGRFAM phenylacetate-CoA oxygenase reductase, PaaK subunit	paaE	0.113976	1.74989	0.0950754	DMSO	0.304975	1.29154	0.0909766	Amp	1.09213	-2.51402	0.065775	0.626398	Not_Sig		0.190999
K562_RS01100	K562_RS01100	CP053300	239994	240548	No_name	phenylacetate-CoA oxygenase subunit PaaJ	PA_CoA_Oxy4 phenylacetate-CoA oxygenase, PaaJ subunit	paaJ	0.567756	1.99651	1.26234	DMSO	0.984612	0.351351	0.871688	Amp	2.09714	-0.470658	0.662403	0.960654	Not_Sig		0.416856
K562_RS01105	K562_RS01105	CP053300	240574	241377	No_name	phenylacetate-CoA oxygenase subunit PaaC	phenylacetic acid	paaC	-0.426483	1.9093	0.0873474	DMSO	-0.436754	2.08475	0.852523	Amp	95.2603	NA	NA	NA	Not_tested		-0.0102707
K562_RS01110	K562_RS01110	CP053300	241388	241672	No_name	1	Phenylacetic acid degradation	paaB	0.0556562	1.21026	0.319774	DMSO	-0.138721	1.34528	0.216072	Amp	2.19024	0.872364	0.432246	0.915703	Not_Sig		-0.194377
K562_RS01115	K562_RS01115	CP053300	241708	242706	No_name	1	PFAM phenylacetic acid catabolic family protein	paaA	0.0782311	1.68559	0.219203	DMSO	0.0426652	1.38641	0.151339	Amp	2.09793	0.231264	0.828458	0.977153	Not_Sig		-0.0355659
K562_RS01120	K562_RS01120	CP053300	242907	244172	No_name	SGNH/GDSL hydrolase family protein	G-D-S-L family	0	0.0584613	1.48669	0.0848249	DMSO	0.0426713	1.2844	0.382776	Amp	20.3631	0.0697571	0.947735	0.995107	Not_Sig		-0.01579
K562_RS01140	K562_RS01140	CP053300	246798	249691	No_name	23S ribosomal RNA	#N/A	#N/A	-2.68622	1.48669	1.94826	DMSO	-4.37414	1.2844	0.442594	Amp	19.3769	1.46332	0.217216	0.788611	Not_Sig		-1.68792
K562_RS01150	K562_RS01150	CP053300	251561	251815	No_name	hypothetical protein	#N/A	#N/A	0.251596	1.4988	0.245294	DMSO	0.354865	1.37627	0.416188	Amp	2.87875	-0.370255	0.729964	0.96687	Not_Sig		0.10327
K562_RS01195	K562_RS01195	CP053300	255368	256066	No_name	50S ribosomal protein L1	Binds directly to 23S rRNA. The L1 stalk is quite mobile in the ribosome, and is involved in E site tRNA release	rplA	0.631679	1.4988	0.877694	DMSO	0.775261	1.37627	0.93492	Amp	1.13465	-0.193933	0.855679	0.981647	Not_Sig		0.143581
K562_RS01220	K562_RS01220	CP053300	266342	268189	No_name	DNA helicase RecQ	ATP-dependent DNA helicase RecQ	recQ	-0.305289	1.59487	0.00759601	DMSO	-0.570825	1.76641	0.368443	Amp	2352.71	NA	NA	NA	Not_tested		-0.265536
K562_RS01240	K562_RS01240	CP053300	271708	272898	No_name	elongation factor Tu	#N/A	#N/A	0.831998	0.00667797	0.0931536	DMSO	1.07137	0.0716914	0.523267	Amp	31.5534	-0.780074	0.478927	0.930054	Not_Sig		0.239372
K562_RS01340	K562_RS01340	CP053300	282170	282352	No_name	50S ribosomal protein L30	Ribosomal protein L30	rpmD	-0.277007	0.00667797	0.300415	DMSO	-3.60977	0.0716914	3.5855	Amp	142.448	NA	NA	NA	Not_tested		-3.33277
K562_RS01360	K562_RS01360	CP053300	284452	284568	No_name	50S ribosomal protein L36	Belongs to the bacterial ribosomal protein bL36 family	rpmJ	-2.56735	0.00667797	2.88031	DMSO	-3.94466	0.0716914	0.689299	Amp	17.4608	0.805491	0.465692	0.92606	Not_Sig		-1.37731
K562_RS01390	K562_RS01390	CP053300	288020	288346	No_name	divalent-cation tolerance protein CutA	PFAM CutA1 divalent ion tolerance protein	cutA	-0.259576	1.43018	0.164167	DMSO	-0.765866	1.73559	0.24729	Amp	2.26905	2.95436	0.0417878	0.551636	Sig		-0.506289
K562_RS01395	K562_RS01395	CP053300	288339	290183	No_name	protein-disulfide reductase DsbD	Required to facilitate the formation of correct disulfide bonds in some periplasmic proteins and for the assembly of the periplasmic c-type cytochromes. Acts by transferring electrons from cytoplasmic thioredoxin to the periplasm. This transfer involves a cascade of disulfide bond formation and reduction steps	dsbD	-2.15401	1.43198	0.314483	DMSO	-2.55328	1.55523	0.405761	Amp	1.66473	1.34709	0.249205	0.821976	Not_Sig		-0.399265
K562_RS01410	K562_RS01410	CP053300	292438	293091	No_name	cytochrome c4	PFAM cytochrome c, class I	cycA	-0.875465	2.0736	0.486814	DMSO	-1.0213	2.10776	0.321573	Amp	2.29176	0.432945	0.687377	0.963653	Not_Sig		-0.145836
K562_RS01415	K562_RS01415	CP053300	293292	295505	No_name	cytochrome c biogenesis protein ResB	cytochrome c biogenesis protein	resB	-2.9903	1.38654	0.392476	DMSO	-2.96368	1.39254	0.254255	Amp	2.38281	-0.0986086	0.926193	0.989739	Not_Sig		0.0266233
K562_RS01420	K562_RS01420	CP053300	295510	296700	No_name	c-type cytochrome biogenesis protein CcsB	Pfam Cytochrome C assembly protein	ccsB	-2.44124	1.74048	0.375686	DMSO	-2.45944	1.95588	0.260114	Amp	2.08604	0.0689647	0.948328	0.995107	Not_Sig		-0.0181941
K562_RS01425	K562_RS01425	CP053300	296859	297854	No_name	protein-methionine-sulfoxide reductase catalyticsubunit MsrP	Part of the MsrPQ system that repairs oxidized periplasmic proteins containing methionine sulfoxide residues (Met-O), using respiratory chain electrons. Thus protects these proteins from oxidative-stress damage caused by reactive species of oxygen and chlorine generated by the host defense mechanisms. MsrPQ is essential for the maintenance of envelope integrity under bleach stress, rescuing a wid…	msrP	0.301555	1.35902	0.284453	DMSO	0.177392	1.29811	0.191677	Amp	2.20231	0.626978	0.564682	0.948418	Not_Sig		-0.124164
K562_RS01430	K562_RS01430	CP053300	297875	298561	No_name	protein-methionine-sulfoxide reductase heme-binding subunit MsrQ	Part of the MsrPQ system that repairs oxidized periplasmic proteins containing methionine sulfoxide residues (Met-O), using respiratory chain electrons. Thus protects these proteins from oxidative-stress damage caused by reactive species of oxygen and chlorine generated by the host defense mechanisms. MsrPQ is essential for the maintenance of envelope integrity under bleach stress, rescuing a wid…	msrQ	-0.146563	1.47871	0.0911728	DMSO	-0.170229	1.77923	0.430661	Amp	22.3121	0.0931188	0.930287	0.990064	Not_Sig		-0.0236664
K562_RS01435	K562_RS01435	CP053300	298644	298919	No_name	lipoprotein	0	0	1.12208	1.47871	0.417449	DMSO	0.903758	1.77923	0.520338	Amp	1.55369	0.566844	0.601115	0.952014	Not_Sig		-0.218319
K562_RS01440	K562_RS01440	CP053300	298956	299282	No_name	iron donor protein CyaY	Belongs to the frataxin family	cyaY	-1.39712	1.92684	1.53916	DMSO	-1.54438	2.12925	0.761256	Amp	4.08794	0.148541	0.889104	0.984305	Not_Sig		-0.147261
K562_RS01445	K562_RS01445	CP053300	299361	301754	No_name	penicillin-binding protein 1A	penicillin-binding protein 1A	mrcA	-0.0502832	1.69957	0.0997879	DMSO	-0.115902	1.73703	0.0835604	Amp	1.42611	0.873235	0.431824	0.915703	Not_Sig		-0.0656186
K562_RS01450	K562_RS01450	CP053300	301975	302898	No_name	competence protein ComA	Pilus assembly protein	0	0.135083	1.70949	0.320999	DMSO	-0.129492	2.06585	0.126217	Amp	6.46808	1.32858	0.254713	0.827997	Not_Sig		-0.264575
K562_RS01455	K562_RS01455	CP053300	302895	303539	No_name	hypothetical protein	PFAM Fimbrial assembly family protein	0	0.249441	1.35853	0.708857	DMSO	-0.378367	2.17721	0.403219	Amp	3.09055	1.33338	0.253273	0.827997	Not_Sig		-0.627807
K562_RS01460	K562_RS01460	CP053300	303536	304402	No_name	hypothetical protein	carbon utilization	0	0.292396	1.24923	0.3486	DMSO	0.168362	1.43772	0.628794	Amp	3.25359	0.298811	0.779965	0.972764	Not_Sig		-0.124034
K562_RS01465	K562_RS01465	CP053300	304399	306024	No_name	type IV pilus secretin PilQ	type IV pilus secretin PilQ	pilQ	-0.0180465	1.57506	0.0898607	DMSO	0.0546747	1.80712	0.23741	Amp	6.98003	-0.496192	0.645787	0.960643	Not_Sig		0.0727212
K562_RS01470	K562_RS01470	CP053300	306065	306619	No_name	shikimate kinase	Catalyzes the specific phosphorylation of the 3-hydroxyl group of shikimic acid using ATP as a cosubstrate	aroK	-3.15616	1.28131	1.43252	DMSO	-2.72713	0.947827	0.880512	Amp	2.64685	-0.441937	0.681377	0.963653	Not_Sig		0.429036
K562_RS01480	K562_RS01480	CP053300	307737	308945	No_name	deoxyguanosinetriphosphate triphosphohydrolase	Belongs to the dGTPase family. Type 2 subfamily	dgt	0.198463	1.37481	0.0352242	DMSO	0.160249	1.31637	0.230174	Amp	42.7004	NA	NA	NA	Not_tested		-0.0382138
K562_RS01485	K562_RS01485	CP053300	309034	310368	No_name	sn-glycerol-3-phosphate ABC transporter substrate-binding protein UgpB	PFAM extracellular solute-binding protein family 1	ugpB	-0.0298316	1.67273	0.027074	DMSO	0.248036	1.59319	0.328199	Amp	146.95	NA	NA	NA	Not_tested		0.277867
K562_RS01490	K562_RS01490	CP053300	310465	311349	No_name	sn-glycerol-3-phosphate ABC transporter permeaseUgpA	PFAM binding-protein-dependent transport systems inner membrane component	ugpA	-0.316301	2.0425	0.0286285	DMSO	-0.329328	2.01283	0.152823	Amp	28.4958	0.14512	0.891635	0.984593	Not_Sig		-0.0130271
K562_RS01495	K562_RS01495	CP053300	311346	312191	No_name	sn-glycerol-3-phosphate ABC transporter permeaseUgpE	probably responsible for the translocation of the substrate across the membrane	ugpE	0.0989948	1.22794	0.25003	DMSO	-0.115392	1.74654	0.050177	Amp	24.8298	1.45611	0.219076	0.788611	Not_Sig		-0.214387
K562_RS01500	K562_RS01500	CP053300	312223	313308	No_name	sn-glycerol-3-phosphate import ATP-binding protein UgpC	Part of the ABC transporter complex UgpABCE involved in sn-glycerol-3-phosphate import. Responsible for energy coupling to the transport system	ugpC	0.00369235	2.02695	0.467406	DMSO	-0.16001	1.96767	0.163421	Amp	8.1804	0.572635	0.597542	0.951242	Not_Sig		-0.163702
K562_RS01505	K562_RS01505	CP053300	313335	314105	No_name	glycerophosphodiester phosphodiesterase	glycerophosphoryl diester phosphodiesterase	ugpQ	-0.486777	1.6894	0.488649	DMSO	-0.20521	1.23445	0.53927	Amp	1.21792	-0.670153	0.539463	0.942121	Not_Sig		0.281568
K562_RS01510	K562_RS01510	CP053300	314288	315019	No_name	OmpW family protein	OmpW family	ompW1	-0.552529	1.61687	0.305787	DMSO	-0.159463	1.23533	0.340092	Amp	1.23696	-1.4886	0.21082	0.778271	Not_Sig		0.393066
K562_RS01515	K562_RS01515	CP053300	315213	315926	No_name	transposase	transposase	0	0.0228995	1.9857	0.360734	DMSO	-0.402135	2.02121	0.0582311	Amp	38.3763	2.01471	0.114184	0.690476	Not_Sig		-0.425035
K562_RS01520	K562_RS01520	CP053300	316215	320918	No_name	glutamate synthase subunit alpha	glutamate synthase	gltB	-0.104258	1.66899	0.078938	DMSO	-0.143097	1.5712	0.0514105	Amp	2.3576	0.714114	0.514615	0.938769	Not_Sig		-0.0388394
K562_RS01525	K562_RS01525	CP053300	321004	322470	No_name	glutamate synthase subunit beta	glutamate synthase	gltD	-0.284417	1.66839	0.193276	DMSO	-0.0236262	1.52293	0.514224	Amp	7.0786	-0.822254	0.457121	0.922405	Not_Sig		0.26079
K562_RS01530	K562_RS01530	CP053300	322846	324339	No_name	alanine:cation symporter family protein	#N/A	#N/A	-0.118324	2.0296	0.17617	DMSO	-0.300558	2.15977	0.198502	Amp	1.26959	1.18928	0.300101	0.849251	Not_Sig		-0.182234
K562_RS01540	K562_RS01540	CP053300	324935	326218	No_name	D-amino acid dehydrogenase	Dehydrogenase	0	0.446801	1.47165	0.154576	DMSO	0.0432014	1.55461	0.148518	Amp	1.08325	3.26109	0.0310487	0.499524	Sig		-0.4036
K562_RS01545	K562_RS01545	CP053300	326244	327506	No_name	MFS transporter	Major facilitator Superfamily	0	0.327971	1.49948	0.152564	DMSO	0.401716	1.53723	0.256838	Amp	2.83409	-0.427575	0.690974	0.963653	Not_Sig		0.0737455
K562_RS01550	K562_RS01550	CP053300	327635	328411	No_name	SDR family oxidoreductase	Short-chain dehydrogenase reductase sdr	0	-0.509121	1.85555	1.88705	DMSO	0.813069	0.635031	2.04226	Amp	1.17126	-0.823597	0.45644	0.922405	Not_Sig		1.32219
K562_RS01555	K562_RS01555	CP053300	328408	330177	No_name	ABC transporter ATP-binding protein/permease	abc transporter	0	-0.290829	1.724	0.405798	DMSO	-0.1978	1.89077	0.432009	Amp	1.13336	-0.271856	0.799188	0.974972	Not_Sig		0.0930291
K562_RS01560	K562_RS01560	CP053300	330797	331933	No_name	FAD-dependent oxidoreductase	PFAM FAD dependent oxidoreductase	thiO	0.159779	1.88373	0.305391	DMSO	0.580907	1.44126	0.258277	Amp	1.39811	-1.8237	0.142264	0.72256	Not_Sig		0.421128
K562_RS01565	K562_RS01565	CP053300	331966	332163	No_name	sulfur carrier protein ThiS	thiamine biosynthesis protein ThiS	thiS	0.925383	0.682158	0.611897	DMSO	0.417911	0.457808	0.421	Amp	2.11248	1.18341	0.302171	0.851367	Not_Sig		-0.507471
K562_RS01570	K562_RS01570	CP053300	332202	333017	No_name	thiazole synthase	Catalyzes the rearrangement of 1-deoxy-D-xylulose 5- phosphate (DXP) to produce the thiazole phosphate moiety of thiamine. Sulfur is provided by the thiocarboxylate moiety of the carrier protein ThiS. In vitro, sulfur can be provided by H(2)S	thiG	0.268877	1.28932	0.158187	DMSO	0.299342	1.22435	0.308948	Amp	3.81441	-0.152024	0.886527	0.984217	Not_Sig		0.0304646
K562_RS01575	K562_RS01575	CP053300	333014	334138	No_name	thiamine phosphate synthase	#N/A	#N/A	-0.159846	1.99986	0.149265	DMSO	-0.338971	2.03672	0.387948	Amp	6.7551	0.746389	0.496911	0.931157	Not_Sig		-0.179125
K562_RS01580	K562_RS01580	CP053300	334223	335044	No_name	ABC transporter ATP-binding protein	abc transporter	mlaF	0.97748	0.750534	0.277144	DMSO	-1.50905	0.320994	0.227847	Amp	1.47953	-12.6779	0.000222926	0.0906465	Sig		-2.48653
K562_RS01585	K562_RS01585	CP053300	335041	335808	No_name	lipid asymmetry maintenance ABC transporter permease subunit MlaE	ABC transporter permease	mlaE	0.709158	0.656724	0.268559	DMSO	-1.612	0.410937	0.20465	Amp	1.72209	-12.8641	0.000210543	0.0906465	Sig		-2.32116
K562_RS01590	K562_RS01590	CP053300	335833	336393	No_name	outer membrane lipid asymmetry maintenance protein MlaD	PFAM Mammalian cell entry related domain protein	mlaD	0.380197	0.810458	0.369574	DMSO	-1.45257	0.954502	0.145679	Amp	6.43592	-8.61618	0.000997391	0.134058	Sig		-1.83276
K562_RS01595	K562_RS01595	CP053300	336425	337387	No_name	VacJ family lipoprotein	PFAM VacJ family lipoprotein	vacJ	0.659325	1.20772	0.451227	DMSO	-1.42955	1.61747	0.233669	Amp	3.72897	-6.21382	0.00341365	0.249744	Sig		-2.08888
K562_RS01600	K562_RS01600	CP053300	337499	338128	No_name	ABC transporter substrate-binding protein	PFAM toluene tolerance family protein	mlaC	-2.00108	0.634652	0.221181	DMSO	-0.922137	0.611997	0.0134533	Amp	270.292	NA	NA	NA	Not_tested		1.07894
K562_RS01605	K562_RS01605	CP053300	338125	338400	No_name	STAS domain-containing protein	STAS domain	mlaB	-1.96796	1.62642	0.226672	DMSO	-0.922137	1.99417	0.356953	Amp	2.47986	-5.51279	0.00528363	0.271717	Sig		1.04583
K562_RS01610	K562_RS01610	CP053300	338593	339519	No_name	ABC transporter ATP-binding protein	ABC transporter	0	0.431654	0.784733	0.129072	DMSO	0.455174	0.89334	0.192418	Amp	2.22241	-0.175823	0.868975	0.981699	Not_Sig		0.0235201
K562_RS01615	K562_RS01615	CP053300	339576	340337	No_name	ABC transporter permease	Transport permease protein	0	0.334562	1.15191	0.0422596	DMSO	0.000596953	1.09535	0.180316	Amp	18.2062	3.12331	0.0354131	0.523355	Sig		-0.333965
K562_RS01620	K562_RS01620	CP053300	340391	340630	No_name	BolA family transcriptional regulator	Belongs to the BolA IbaG family	0	-0.899325	1.05655	0.807718	DMSO	-2.49347	2.05292	0.418448	Amp	3.72594	3.03531	0.0385792	0.540657	Sig		-1.59415
K562_RS01625	K562_RS01625	CP053300	340645	341994	No_name	UDP-N-acetylglucosamine 1-carboxyvinyltransferase	Cell wall formation. Adds enolpyruvyl to UDP-N- acetylglucosamine	murA	-0.215681	1.83204	0.159449	DMSO	-0.1148	2.03876	0.405859	Amp	6.47897	-0.400705	0.709118	0.965336	Not_Sig		0.100881
K562_RS01630	K562_RS01630	CP053300	341991	342644	No_name	ATP phosphoribosyltransferase	Catalyzes the condensation of ATP and 5-phosphoribose 1- diphosphate to form N'-(5'-phosphoribosyl)-ATP (PR-ATP). Has a crucial role in the pathway because the rate of histidine biosynthesis seems to be controlled primarily by regulation of HisG enzymatic activity	hisG	-0.547618	2.02153	0.244234	DMSO	-0.633208	1.98372	0.126443	Amp	3.73097	0.539027	0.618469	0.955832	Not_Sig		-0.0855896
K562_RS01635	K562_RS01635	CP053300	342669	343985	No_name	histidinol dehydrogenase	Catalyzes the sequential NAD-dependent oxidations of L- histidinol to L-histidinaldehyde and then to L-histidine	hisD	0.840801	0.739872	0.78543	DMSO	0.213283	0.702033	0.354461	Amp	4.90996	1.26132	0.27574	0.836015	Not_Sig		-0.627518
K562_RS01640	K562_RS01640	CP053300	344084	345157	No_name	histidinol-phosphate transaminase	Belongs to the class-II pyridoxal-phosphate-dependent aminotransferase family. Histidinol-phosphate aminotransferase subfamily	hisC	0.934829	0.573588	0.152365	DMSO	0.837297	0.59114	0.129431	Amp	1.38578	0.844989	0.445697	0.918639	Not_Sig		-0.0975311
K562_RS01645	K562_RS01645	CP053300	345223	345810	No_name	imidazoleglycerol-phosphate dehydratase HisB	imidazoleglycerol-phosphate dehydratase	hisB	0.200484	1.49644	0.286346	DMSO	0.0811994	1.7587	0.377624	Amp	1.73914	0.435959	0.685363	0.963653	Not_Sig		-0.119284
K562_RS01650	K562_RS01650	CP053300	345872	346492	No_name	YchE family NAAT transporter	UPF0056 inner membrane protein	0	-0.36737	1.40863	0.522259	DMSO	-0.377344	2.19892	0.348409	Amp	2.24695	0.027519	0.979364	0.997585	Not_Sig		-0.00997467
K562_RS01655	K562_RS01655	CP053300	346489	347130	No_name	imidazole glycerol phosphate synthase subunit HisH	IGPS catalyzes the conversion of PRFAR and glutamine to IGP, AICAR and glutamate. The HisH subunit provides the glutamine amidotransferase activity that produces the ammonia necessary to HisF for the synthesis of IGP and AICAR	hisH	0.375897	1.6867	0.14255	DMSO	-0.0588247	1.82151	0.0631006	Amp	5.10348	4.83002	0.00846113	0.328288	Sig		-0.434721
K562_RS01660	K562_RS01660	CP053300	347294	348049	No_name	1-(5-phosphoribosyl)-5-[(5- phosphoribosylamino)methylideneamino]imidazole-4- carboxamide isomerase	1-(5-phosphoribosyl)-5- (5-phosphoribosylamino)methylideneamino imidazole-4-carboxamide isomerase	hisA	0.0663226	1.41944	0.17484	DMSO	0.176213	1.70975	0.463289	Amp	7.02139	-0.384373	0.720262	0.965921	Not_Sig		0.10989
K562_RS01665	K562_RS01665	CP053300	348156	348929	No_name	imidazole glycerol phosphate synthase subunit HisF	IGPS catalyzes the conversion of PRFAR and glutamine to IGP, AICAR and glutamate. The HisF subunit catalyzes the cyclization activity that produces IGP and AICAR from PRFAR using the ammonia provided by the HisH subunit	hisF	-0.0371681	1.02777	0.432425	DMSO	0.420189	0.415419	0.413287	Amp	1.09475	-1.32433	0.255994	0.827997	Not_Sig		0.457357
K562_RS01670	K562_RS01670	CP053300	348929	349345	No_name	phosphoribosyl-AMP cyclohydrolase	Catalyzes the hydrolysis of the adenine ring of phosphoribosyl-AMP	hisI	0.437694	0.838686	0.315826	DMSO	0.233936	1.50386	0.388091	Amp	1.50998	0.70533	0.519512	0.940165	Not_Sig		-0.203758
K562_RS01675	K562_RS01675	CP053300	349342	349707	No_name	phosphoribosyl-ATP diphosphatase	Phosphoribosyl-ATP	hisE	0.995878	0.193241	0.209641	DMSO	0.430428	1.2547	0.187473	Amp	1.25047	3.4824	0.0252967	0.483953	Sig		-0.56545
K562_RS01680	K562_RS01680	CP053300	349778	350170	No_name	membrane protein	membrane	0	-0.609834	1.68367	0.45091	DMSO	-0.652608	1.50631	0.245693	Amp	3.36817	0.144278	0.892258	0.984848	Not_Sig		-0.0427743
K562_RS01685	K562_RS01685	CP053300	350202	350567	No_name	histidine triad nucleotide-binding protein	PFAM histidine triad (HIT) protein	0	1.3411	0.0133535	0.22012	DMSO	1.25255	0.0046646	0.110607	Amp	3.96052	0.62261	0.567277	0.948418	Not_Sig		-0.0885529
K562_RS01690	K562_RS01690	CP053300	350661	350891	No_name	Sec-independent protein translocase subunit TatA	Part of the twin-arginine translocation (Tat) system that transports large folded proteins containing a characteristic twin-arginine motif in their signal peptide across membranes. TatA could form the protein-conducting channel of the Tat system	tatA	-1.61754	0.0133535	2.65929	DMSO	-1.84567	0.0046646	2.93619	Amp	1.21909	0.0997458	0.925345	0.989739	Not_Sig		-0.228133
K562_RS01700	K562_RS01700	CP053300	351499	352287	No_name	twin-arginine translocase subunit TatC	Part of the twin-arginine translocation (Tat) system that transports large folded proteins containing a characteristic twin-arginine motif in their signal peptide across membranes. Together with TatB, TatC is part of a receptor directly interacting with Tat signal peptides	tatC	-3.34658	0.0133535	1.42389	DMSO	-3.58148	0.0046646	1.18532	Amp	1.44306	0.2196	0.836934	0.980102	Not_Sig		-0.234895
K562_RS01705	K562_RS01705	CP053300	352497	353702	No_name	Do family serine endopeptidase	Belongs to the peptidase S1C family	0	0.0246355	1.85586	0.364878	DMSO	-0.137942	1.65447	0.181157	Amp	4.05682	0.691241	0.527438	0.940833	Not_Sig		-0.162578
K562_RS01710	K562_RS01710	CP053300	353724	354470	No_name	Nif3-like dinuclear metal center hexameric protein	NIF3 (NGG1p interacting factor 3)	0	-0.475369	1.96046	0.594792	DMSO	-0.27803	2.07926	0.351889	Amp	2.85705	-0.494584	0.646826	0.960643	Not_Sig		0.197339
K562_RS01715	K562_RS01715	CP053300	354689	355309	No_name	ubiquinol-cytochrome c reductase iron-sulfur subunit	Component of the ubiquinol-cytochrome c reductase complex (complex III or cytochrome b-c1 complex), which is a respiratory chain that generates an electrochemical potential coupled to ATP synthesis	petA	-0.231053	2.15414	0.248576	DMSO	-0.800451	2.42073	0.564622	Amp	5.15936	1.59864	0.185146	0.763568	Not_Sig		-0.569399
K562_RS01720	K562_RS01720	CP053300	355309	356691	No_name	cytochrome bc complex cytochrome b subunit	Component of the ubiquinol-cytochrome c reductase complex (complex III or cytochrome b-c1 complex), which is a respiratory chain that generates an electrochemical potential coupled to ATP synthesis	petB	-0.323546	1.59706	0.144954	DMSO	-0.112294	1.57231	0.217825	Amp	2.25817	-1.39845	0.23453	0.80679	Not_Sig		0.211252
K562_RS01725	K562_RS01725	CP053300	356713	357471	No_name	cytochrome c1	Cytochrome C1	petC	-0.0261191	1.26319	0.691411	DMSO	-0.646931	1.94991	0.103248	Amp	44.8447	NA	NA	NA	Not_tested		-0.620812
K562_RS01735	K562_RS01735	CP053300	358249	358770	No_name	ClpXP protease specificity-enhancing factor	stringent starvation protein b	sspB	0.159812	1.88571	0.51923	DMSO	0.0158524	1.93924	0.114256	Amp	20.6518	0.469	0.66349	0.960654	Not_Sig		-0.143959
K562_RS01745	K562_RS01745	CP053300	359219	359422	No_name	hypothetical protein	#N/A	#N/A	-0.815222	2.05368	0.464428	DMSO	-0.488705	1.6749	0.576302	Amp	1.5398	-0.764097	0.487394	0.930054	Not_Sig		0.326517
K562_RS01750	K562_RS01750	CP053300	359532	360332	No_name	transporter substrate-binding domain-containing protein	belongs to the bacterial solute-binding protein 3 family	0	0.305505	1.27427	0.154185	DMSO	0.0546693	1.40713	0.129769	Amp	1.4117	2.15585	0.0973411	0.678063	Not_Sig		-0.250836
K562_RS01755	K562_RS01755	CP053300	360614	360931	No_name	hypothetical protein	0	0	-1.67584	1.70867	0.473422	DMSO	-1.41889	0.364126	0.445864	Amp	1.12743	-0.684342	0.531351	0.940833	Not_Sig		0.256947
K562_RS01760	K562_RS01760	CP053300	361013	361348	No_name	hypothetical protein	0	0	0.131322	1.93974	0.55397	DMSO	0.433755	1.3604	0.13167	Amp	17.701	-0.91996	0.409653	0.914198	Not_Sig		0.302432
K562_RS01765	K562_RS01765	CP053300	361462	362244	No_name	type IVB secretion system protein IcmH/DotU	Type IV VI secretion system	0	0.409845	1.19436	0.365731	DMSO	0.0601957	1.51284	0.351456	Amp	1.08289	1.19396	0.298459	0.848536	Not_Sig		-0.349649
K562_RS01770	K562_RS01770	CP053300	362241	363587	No_name	type VI secretion system baseplate subunit TssK	type VI secretion protein	0	0.198931	1.38375	0.273448	DMSO	-0.0765126	1.56405	0.0789423	Amp	11.9986	1.67623	0.169	0.750196	Not_Sig		-0.275443
K562_RS01775	K562_RS01775	CP053300	363693	364292	No_name	type VI secretion system lipoprotein TssJ	#N/A	#N/A	0.271729	1.33134	0.0916504	DMSO	0.348708	1.12852	0.134037	Amp	2.13886	-0.82113	0.457692	0.922405	Not_Sig		0.0769789
K562_RS01780	K562_RS01780	CP053300	364679	365305	No_name	hypothetical protein	PFAM Tetratricopeptide TPR_2 repeat protein	0	0.124033	1.38659	0.145518	DMSO	0.130345	1.5404	0.0730316	Amp	3.9702	-0.0671561	0.94968	0.995107	Not_Sig		0.00631281
K562_RS01785	K562_RS01785	CP053300	365352	365867	No_name	type VI secretion system contractile sheath small subunit	type VI secretion protein	0	-0.272747	2.30058	0.327452	DMSO	-0.420696	2.51558	0.589557	Amp	3.24157	0.379981	0.723274	0.965921	Not_Sig		-0.147949
K562_RS01790	K562_RS01790	CP053300	365883	367373	No_name	type VI secretion system contractile sheath large subunit	type VI secretion protein	0	0.0870078	1.77869	0.121045	DMSO	0.0700483	1.77268	0.261319	Amp	4.66062	0.101998	0.923667	0.989595	Not_Sig		-0.0169595
K562_RS01795	K562_RS01795	CP053300	367444	367947	No_name	type VI secretion system tube protein Hcp	type VI secretion system effector, Hcp1 family	0	0.422253	1.63455	0.418111	DMSO	0.388397	1.69121	0.22723	Amp	3.38572	0.123225	0.907872	0.986615	Not_Sig		-0.0338552
K562_RS01800	K562_RS01800	CP053300	368010	368495	No_name	type VI secretion system baseplate subunit TssE	TIGRFAM type VI secretion system lysozyme-related protein	0	0.341534	1.31284	0.271115	DMSO	0.299945	1.60293	0.351851	Amp	1.68427	0.162174	0.879031	0.98272	Not_Sig		-0.0415898
K562_RS01805	K562_RS01805	CP053300	368572	370407	No_name	type VI secretion system baseplate subunit TssF	type VI secretion protein	0	-0.123244	1.70838	0.130603	DMSO	-0.0825889	1.69217	0.143073	Amp	1.20007	-0.363497	0.734631	0.967839	Not_Sig		0.0406549
K562_RS01810	K562_RS01810	CP053300	370371	371471	No_name	type VI secretion system baseplate subunit TssG	Type VI secretion protein	0	0.645879	0.898791	0.160756	DMSO	0.731149	0.828263	0.204599	Amp	1.61984	-0.567607	0.600644	0.952014	Not_Sig		0.0852691
K562_RS01815	K562_RS01815	CP053300	371513	374182	No_name	type VI secretion system ATPase TssH	type VI secretion ATPase, ClpV1 family	clpB2	0.178622	1.57383	0.238029	DMSO	-0.0320239	1.71412	0.0710766	Amp	11.2152	1.46871	0.215835	0.787931	Not_Sig		-0.210646
K562_RS01820	K562_RS01820	CP053300	374227	375348	No_name	type VI secretion system protein TssA	TIGRFAM type VI secretion-associated protein, ImpA family	0	0.493506	1.18694	0.21046	DMSO	0.640008	0.994606	0.0792319	Amp	7.05571	-1.12837	0.322256	0.867305	Not_Sig		0.146502
K562_RS01825	K562_RS01825	CP053300	375442	376392	No_name	OmpA family protein	Belongs to the ompA family	0	0.537407	1.37858	0.423375	DMSO	0.575138	1.11487	0.117811	Amp	12.9144	-0.148709	0.888979	0.984305	Not_Sig		0.0377308
K562_RS01830	K562_RS01830	CP053300	376397	377386	No_name	type VI secretion system-associated protein TagF	type VI secretion-associated protein	0	-0.107509	2.04377	0.153032	DMSO	0.0970845	1.61989	0.299659	Amp	3.83431	-1.05318	0.351672	0.886667	Not_Sig		0.204594
K562_RS01835	K562_RS01835	CP053300	377383	381327	No_name	type VI secretion system membrane subunit TssM	type VI secretion protein	0	0.269136	1.74505	0.179271	DMSO	0.125867	1.93319	0.185018	Amp	1.06514	0.963222	0.389982	0.902001	Not_Sig		-0.143269
K562_RS01840	K562_RS01840	CP053300	381629	382474	No_name	M15 family metallopeptidase	peptidase M15B and M15C DD-carboxypeptidase VanY	0	0.00277562	1.75843	0.141298	DMSO	0.0866534	1.65255	0.122293	Amp	1.33496	-0.77744	0.480316	0.930054	Not_Sig		0.0838778
K562_RS01845	K562_RS01845	CP053300	382596	383588	No_name	hypothetical protein	0	0	1.53953	0.321259	0.499554	DMSO	1.57953	0.215432	0.391476	Amp	1.62838	-0.109169	0.918326	0.988983	Not_Sig		0.0400024
K562_RS01850	K562_RS01850	CP053300	383800	384828	No_name	transporter	PFAM Mg2 transporter protein CorA family protein	0	0.479406	1.11272	0.193234	DMSO	0.452015	0.954918	0.0848312	Amp	5.18869	0.224809	0.833146	0.979372	Not_Sig		-0.027391
K562_RS01860	K562_RS01860	CP053300	385033	386010	No_name	zinc-binding alcohol dehydrogenase family protein	Zinc-binding dehydrogenase	0	0.807358	1.11447	0.867624	DMSO	0.750902	0.7965	0.213132	Amp	16.5717	0.10945	0.918117	0.988983	Not_Sig		-0.056456
K562_RS01865	K562_RS01865	CP053300	386172	387092	No_name	LysR family transcriptional regulator	LysR substrate binding domain	0	-0.389757	2.3023	0.537164	DMSO	0.745165	0.445058	0.429242	Amp	1.56607	-2.85885	0.045983	0.570475	Sig		1.13492
K562_RS01870	K562_RS01870	CP053300	387215	389383	No_name	peptidase M1	PFAM peptidase M1, membrane alanine aminopeptidase	0	0.20563	1.43182	0.136869	DMSO	0.151181	1.5419	0.0829033	Amp	2.72563	0.589364	0.587295	0.948571	Not_Sig		-0.0544496
K562_RS01875	K562_RS01875	CP053300	390026	390520	No_name	LEA type 2 family protein	Water Stress and Hypersensitive response	0	0.809378	0.513345	0.0906092	DMSO	0.858646	0.608791	0.128138	Amp	1.99991	-0.54375	0.615501	0.955832	Not_Sig		0.049268
K562_RS01880	K562_RS01880	CP053300	390675	391007	No_name	YegP family protein	Domain of unknown function (DUF1508)	0	0.142101	1.00626	0.359209	DMSO	-0.427845	1.81187	0.26145	Amp	1.88763	2.22195	0.0904159	0.669601	Not_Sig		-0.569946
K562_RS01885	K562_RS01885	CP053300	391145	392278	No_name	class I SAM-dependent methyltransferase	Pfam Methyltransferase small	hemK1	-0.12647	1.70879	0.286288	DMSO	-0.0204894	1.42454	0.104222	Amp	7.54555	-0.602502	0.57933	0.948571	Not_Sig		0.10598
K562_RS01890	K562_RS01890	CP053300	392368	393258	No_name	SAM-dependent methyltransferase	Methyltransferase domain	0	-0.393695	1.83684	0.250004	DMSO	-0.127786	1.82207	0.478123	Amp	3.65751	-0.853631	0.441414	0.918354	Not_Sig		0.265909
K562_RS01895	K562_RS01895	CP053300	393319	393891	No_name	DUF1415 domain-containing protein	Protein of unknown function (DUF1415)	0	0.21305	1.55659	0.305663	DMSO	-0.192491	1.73214	0.0811764	Amp	14.1784	2.22103	0.090509	0.669601	Not_Sig		-0.405542
K562_RS01900	K562_RS01900	CP053300	393968	394588	No_name	TetR/AcrR family transcriptional regulator	PFAM regulatory protein TetR	0	0.0570722	1.65642	0.324346	DMSO	0.188057	1.62763	0.346159	Amp	1.13903	-0.478262	0.657429	0.960654	Not_Sig		0.130985
K562_RS01905	K562_RS01905	CP053300	394808	396091	No_name	MFS transporter	PFAM major facilitator superfamily MFS_1	0	0.297813	1.34632	0.159504	DMSO	-0.0738659	1.90986	0.34173	Amp	4.59011	1.70705	0.163003	0.743828	Not_Sig		-0.371678
K562_RS01910	K562_RS01910	CP053300	396247	396852	No_name	nitroreductase family protein	Pfam Nitroreductase	0	0.164337	1.477	0.0781325	DMSO	0.276326	1.62691	0.283154	Amp	13.1335	-0.660358	0.545114	0.942909	Not_Sig		0.111989
K562_RS01915	K562_RS01915	CP053300	397042	398292	No_name	Hsp70 family protein	heat shock protein 70	0	0.0119894	1.47658	0.353124	DMSO	-0.0923326	1.3351	0.278871	Amp	1.60341	0.40157	0.70853	0.965336	Not_Sig		-0.104322
K562_RS01920	K562_RS01920	CP053300	398394	398597	No_name	cold-shock protein	Cold shock protein	cspD	-1.28455	1.66568	0.645669	DMSO	-0.855457	2.59001	0.454108	Amp	2.02163	-0.941528	0.399744	0.908565	Not_Sig		0.429094
K562_RS01925	K562_RS01925	CP053300	399018	400616	No_name	APC family permease	amino acid	0	0.139329	1.5625	0.150558	DMSO	0.199347	1.49475	0.259436	Amp	2.96928	-0.346562	0.746384	0.967973	Not_Sig		0.0600178
K562_RS01930	K562_RS01930	CP053300	400728	401519	No_name	dioxygenase	Extradiol ring-cleavage dioxygenase class III protein subunit B	0	-0.268634	1.39197	0.0200111	DMSO	-0.0653713	1.37928	0.267279	Amp	178.398	NA	NA	NA	Not_tested		0.203263
K562_RS01935	K562_RS01935	CP053300	401722	402318	No_name	UbiX family flavin prenyltransferase	Flavin prenyltransferase that catalyzes the synthesis of the prenylated FMN cofactor (prenyl-FMN) for 4-hydroxy-3- polyprenylbenzoic acid decarboxylase UbiD. The prenyltransferase is metal-independent and links a dimethylallyl moiety from dimethylallyl monophosphate (DMAP) to the flavin N5 and C6 atoms of FMN	ubiX	-0.694066	1.30196	0.307206	DMSO	-0.920043	1.37174	0.210922	Amp	2.12136	1.05034	0.352827	0.886667	Not_Sig		-0.225977
K562_RS01940	K562_RS01940	CP053300	402343	402654	No_name	Grx4 family monothiol glutaredoxin	Belongs to the glutaredoxin family. Monothiol subfamily	grxD	-0.643165	1.70327	0.17958	DMSO	-0.886344	1.43971	0.459746	Amp	6.55424	0.853363	0.441547	0.918354	Not_Sig		-0.243179
K562_RS01945	K562_RS01945	CP053300	402722	403564	No_name	peptide chain release factor N(5)-glutamine methyltransferase	Methylates the class 1 translation termination release factors RF1 PrfA and RF2 PrfB on the glutamine residue of the universally conserved GGQ motif	prmC	-1.44794	1.44873	0.253096	DMSO	-0.982537	1.14337	0.13724	Amp	3.40101	-2.79983	0.0488198	0.579759	Sig		0.465403
K562_RS01960	K562_RS01960	CP053300	406072	406836	No_name	response regulator transcription factor	Two component transcriptional regulator, winged helix family	0	-0.18416	2.33576	0.182152	DMSO	0.148582	1.55103	0.415179	Amp	5.19519	-1.27118	0.272556	0.83512	Not_Sig		0.332743
K562_RS01965	K562_RS01965	CP053300	407008	407262	No_name	hypothetical protein	0	0	1.57359	1.20138	1.73145	DMSO	1.01829	0.117428	0.24312	Amp	50.7201	NA	NA	NA	Not_tested		-0.5553
K562_RS01970	K562_RS01970	CP053300	407281	409095	No_name	aminopeptidase P family protein	peptidase M24	pepQ	-0.170357	1.82426	0.0928599	DMSO	-0.328979	1.74828	0.21353	Amp	5.28762	1.17993	0.303409	0.852608	Not_Sig		-0.158623
K562_RS01975	K562_RS01975	CP053300	409193	409744	No_name	cysteine hydrolase	PFAM isochorismatase hydrolase	0	-0.158267	1.5656	0.466369	DMSO	-0.221845	2.04926	0.861956	Amp	3.41594	0.112364	0.915948	0.988771	Not_Sig		-0.0635784
K562_RS01980	K562_RS01980	CP053300	409741	410364	No_name	HAD-IA family hydrolase	IA, variant 3	0	0.404139	1.41482	0.206753	DMSO	0.357403	1.11951	0.367531	Amp	3.15998	0.19196	0.857125	0.981647	Not_Sig		-0.0467356
K562_RS01985	K562_RS01985	CP053300	410505	412172	No_name	energy-dependent translational throttle protein EttA	abc transporter	0	0.00192262	1.89029	0.124107	DMSO	0.180484	1.56523	0.219401	Amp	3.12528	-1.22695	0.28712	0.844936	Not_Sig		0.178561
K562_RS01990	K562_RS01990	CP053300	412341	412649	No_name	DUF3761 domain-containing protein	Protein of unknown function (DUF3761)	0	0.983048	0.16605	0.28883	DMSO	0.444896	0.243046	0.62135	Amp	4.62793	1.36034	0.245335	0.815858	Not_Sig		-0.538152
K562_RS01995	K562_RS01995	CP053300	412739	413656	No_name	transcriptional regulator GcvA	regulatory protein LysR	0	0.525612	1.17235	0.21018	DMSO	0.247438	1.09576	0.373995	Amp	3.16627	1.12309	0.324249	0.86815	Not_Sig		-0.278175
K562_RS02000	K562_RS02000	CP053300	413850	415118	No_name	MFS transporter	Uncharacterised MFS-type transporter YbfB	0	-0.111284	1.86386	0.573307	DMSO	0.885525	0.523308	0.547702	Amp	1.09569	-2.17754	0.0950058	0.674479	Not_Sig		0.996809
K562_RS02005	K562_RS02005	CP053300	415200	415547	No_name	MmcQ/YjbR family DNA-binding protein	YjbR	0	0.931009	1.39229	0.323425	DMSO	0.673038	0.742079	0.789416	Amp	5.95753	0.523758	0.628125	0.957962	Not_Sig		-0.257971
K562_RS02010	K562_RS02010	CP053300	415924	417315	No_name	GABA permease	GabA permease	gabP	0.0208808	1.7778	0.19715	DMSO	-0.00436121	1.75464	0.0589032	Amp	11.2025	0.212481	0.84212	0.981147	Not_Sig		-0.025242
K562_RS02015	K562_RS02015	CP053300	417569	418780	No_name	MBL fold metallo-hydrolase	Metallo-beta-lactamase superfamily	0	-0.0453613	1.67236	0.112848	DMSO	-0.0937091	1.65712	0.06298	Amp	3.21055	0.647985	0.552312	0.943753	Not_Sig		-0.0483478
K562_RS02020	K562_RS02020	CP053300	418854	419948	No_name	redox-regulated ATPase YchF	ATPase that binds to both the 70S ribosome and the 50S ribosomal subunit in a nucleotide-independent manner	ychF	-0.538511	1.23337	0.184603	DMSO	-0.52404	1.50848	0.112821	Amp	2.67731	-0.115852	0.913353	0.988771	Not_Sig		0.014471
K562_RS02030	K562_RS02030	CP053300	421464	422192	No_name	DsbC family protein	Required for disulfide bond formation in some periplasmic proteins. Acts by transferring its disulfide bond to other proteins and is reduced in the process	dsbC	0.318485	1.44664	0.332905	DMSO	0.437994	1.33124	0.200706	Amp	2.7512	-0.532497	0.622588	0.956191	Not_Sig		0.119509
K562_RS02035	K562_RS02035	CP053300	422298	424097	No_name	M61 family metallopeptidase	Peptidase M61	0	-0.280817	1.69045	0.676967	DMSO	-0.205754	1.78741	0.63661	Amp	1.13081	-0.139909	0.895494	0.984911	Not_Sig		0.0750636
K562_RS02040	K562_RS02040	CP053300	424245	424841	No_name	NAD(P)H-dependent oxidoreductase	Catalyzes the reductive cleavage of azo bond in aromatic azo compounds to the corresponding amines. Requires NADH, but not NADPH, as an electron donor for its activity	azoR	-0.439788	2.10194	0.0589336	DMSO	-0.369176	1.69716	0.0943104	Amp	2.5609	-1.09976	0.333178	0.877298	Not_Sig		0.0706121
K562_RS02050	K562_RS02050	CP053300	425898	426524	No_name	CYTH domain-containing protein	Adenylate cyclase	0	1.42688	0.0685103	0.240602	DMSO	-0.678574	4.38684	0.34394	Amp	2.04347	8.68806	0.000966151	0.132879	Sig		-2.10545
K562_RS02055	K562_RS02055	CP053300	426524	427309	No_name	indole-3-glycerol phosphate synthase TrpC	Belongs to the TrpC family	trpC	0.0769498	1.18536	0.397971	DMSO	0.159014	1.48403	0.350746	Amp	1.28741	-0.267948	0.80199	0.97533	Not_Sig		0.0820642
K562_RS02060	K562_RS02060	CP053300	427338	428369	No_name	anthranilate phosphoribosyltransferase	Catalyzes the transfer of the phosphoribosyl group of 5- phosphorylribose-1-pyrophosphate (PRPP) to anthranilate to yield N-(5'-phosphoribosyl)-anthranilate (PRA)	trpD	0.0199828	1.7271	0.0183502	DMSO	-0.0623039	1.62755	0.0978109	Amp	28.4115	1.43216	0.225367	0.798483	Not_Sig		-0.0822868
K562_RS02065	K562_RS02065	CP053300	428383	428982	No_name	aminodeoxychorismate/anthranilate synthase component II	Anthranilate synthase	trpG	-0.0487522	1.73116	0.29988	DMSO	0.200576	1.70857	0.118555	Amp	6.39821	-1.33922	0.251534	0.825054	Not_Sig		0.249329
K562_RS02070	K562_RS02070	CP053300	428996	430489	No_name	anthranilate synthase component I	Part of a heterotetrameric complex that catalyzes the two-step biosynthesis of anthranilate, an intermediate in the biosynthesis of L-tryptophan. In the first step, the glutamine- binding beta subunit (TrpG) of anthranilate synthase (AS) provides the glutamine amidotransferase activity which generates ammonia as a substrate that, along with chorismate, is used in the second step, catalyzed by the…	trpE	0.0237993	1.92978	0.0708008	DMSO	0.0625354	1.60333	0.0705978	Amp	1.00576	-0.671036	0.538956	0.942121	Not_Sig		0.0387361
K562_RS02075	K562_RS02075	CP053300	430847	431611	No_name	phosphoglycolate phosphatase	Phosphoglycolate phosphatase	gph	0.159	1.62588	0.269194	DMSO	-0.125901	1.41028	0.190196	Amp	2.00321	1.49713	0.208706	0.777461	Not_Sig		-0.284902
K562_RS02080	K562_RS02080	CP053300	431616	432302	No_name	ribulose-phosphate 3-epimerase	Belongs to the ribulose-phosphate 3-epimerase family	rpe	-2.06287	1.28511	0.26802	DMSO	-1.0918	1.35361	0.842118	Amp	9.87215	-1.90322	0.129756	0.703306	Not_Sig		0.971077
K562_RS02085	K562_RS02085	CP053300	432481	432855	No_name	Co2+/Mg2+ efflux protein ApaG	PFAM ApaG domain protein	apaG	1.17142	0.947913	0.3929	DMSO	1.1741	0.749528	0.493174	Amp	1.57557	-0.00736812	0.994474	0.999047	Not_Sig		0.00268234
K562_RS02095	K562_RS02095	CP053300	434429	435727	No_name	phenylacetate--CoA ligase	Catalyzes the activation of phenylacetic acid (PA) to phenylacetyl-CoA (PA-CoA)	paaK	0.246816	1.35703	0.323495	DMSO	-0.103058	1.75476	0.442404	Amp	1.87026	1.10572	0.330876	0.875135	Not_Sig		-0.349874
K562_RS02100	K562_RS02100	CP053300	435766	436218	No_name	hydroxyphenylacetyl-CoA thioesterase PaaI	phenylacetic acid degradation protein	paaI	-0.199621	1.55015	0.15566	DMSO	-0.170612	2.28372	0.703924	Amp	20.4503	-0.0696939	0.947782	0.995107	Not_Sig		0.0290086
K562_RS02105	K562_RS02105	CP053300	436220	437011	No_name	2-(1	Belongs to the enoyl-CoA hydratase isomerase family	paaB	0.155036	1.32299	0.57423	DMSO	0.0533606	1.14872	0.224036	Amp	6.56954	0.285709	0.789286	0.97348	Not_Sig		-0.101676
K562_RS02110	K562_RS02110	CP053300	437057	438259	No_name	3-oxoadipyl-CoA thiolase	Belongs to the thiolase family	0	-0.0598877	1.88075	0.151915	DMSO	-0.159984	1.83627	0.272186	Amp	3.21019	0.556195	0.607722	0.955832	Not_Sig		-0.100096
K562_RS02115	K562_RS02115	CP053300	438347	440053	No_name	phenylacetic acid degradation protein PaaN	phenylacetic acid degradation protein paaN	paaN	-0.202848	1.60101	0.462368	DMSO	-0.243496	1.8457	0.192395	Amp	5.77551	0.140584	0.894994	0.984911	Not_Sig		-0.040648
K562_RS02120	K562_RS02120	CP053300	440183	440959	No_name	enoyl-CoA hydratase	Belongs to the enoyl-CoA hydratase isomerase family	paaF	-0.179666	1.65981	0.413146	DMSO	-0.210376	1.62234	0.148879	Amp	7.70094	0.121124	0.909433	0.987601	Not_Sig		-0.0307104
K562_RS02150	K562_RS02150	CP053300	446982	447314	No_name	hypothetical protein	0	0	-0.206272	1.8381	0.199101	DMSO	-0.158569	1.59066	0.229305	Amp	1.32642	-0.272071	0.799034	0.974972	Not_Sig		0.0477022
K562_RS02155	K562_RS02155	CP053300	447676	448575	No_name	GIY-YIG nuclease family protein	0	0	-0.329907	1.73954	0.211418	DMSO	-0.228588	1.72024	0.279721	Amp	1.75052	-0.500496	0.643011	0.9605	Not_Sig		0.101318
K562_RS02160	K562_RS02160	CP053300	448729	450099	No_name	hypothetical protein	#N/A	#N/A	-0.330295	1.79438	0.130596	DMSO	-0.280489	1.95751	0.311272	Amp	5.68098	-0.255557	0.810896	0.976318	Not_Sig		0.0498054
K562_RS02165	K562_RS02165	CP053300	451031	451537	No_name	type I restriction-modification system subunit MN-terminal domain-containing protein	#N/A	#N/A	-0.280117	1.62694	0.160156	DMSO	-0.0141347	1.47949	0.202186	Amp	1.59374	-1.7861	0.148623	0.725963	Not_Sig		0.265982
K562_RS02175	K562_RS02175	CP053300	452771	455107	No_name	type I restriction endonuclease subunit R	#N/A	#N/A	-0.176031	1.63364	0.0899229	DMSO	-0.220394	1.66957	0.0921837	Amp	1.05092	0.596665	0.58286	0.948571	Not_Sig		-0.0443624
K562_RS02215	K562_RS02215	CP053300	464064	464498	No_name	transcriptional regulator	0	0	-0.655013	1.8819	0.631305	DMSO	-0.224581	1.89886	0.441874	Amp	2.04118	-0.967489	0.388087	0.900764	Not_Sig		0.430432
K562_RS02220	K562_RS02220	CP053300	464836	466230	No_name	tRNA uridine-5-carboxymethylaminomethyl(34) synthesis GTPase MnmE	Exhibits a very high intrinsic GTPase hydrolysis rate. Involved in the addition of a carboxymethylaminomethyl (cmnm) group at the wobble position (U34) of certain tRNAs, forming tRNA- cmnm(5)s(2)U34	mnmE	-1.1415	1.74423	0.566916	DMSO	-1.11882	1.89205	0.18113	Amp	9.7962	-0.0660018	0.950544	0.995107	Not_Sig		0.0226788
K562_RS02225	K562_RS02225	CP053300	466648	468006	No_name	GGDEF domain-containing protein	Diguanylate cyclase	0	0.317848	1.45037	0.300668	DMSO	0.181108	1.27304	0.234013	Amp	1.65079	0.621626	0.567863	0.948418	Not_Sig		-0.13674
K562_RS02230	K562_RS02230	CP053300	468116	468364	No_name	DUF2795 domain-containing protein	Protein of unknown function (DUF2795)	0	1.2977	0.177981	0.307634	DMSO	0.910832	0.0404441	0.10986	Amp	7.84133	2.05127	0.109532	0.683949	Not_Sig		-0.386867
K562_RS02235	K562_RS02235	CP053300	468480	468650	No_name	hypothetical protein	0	0	0.771502	0.790207	0.330572	DMSO	0.840989	0.992936	0.651649	Amp	3.88593	-0.164711	0.87716	0.982574	Not_Sig		0.0694869
K562_RS02240	K562_RS02240	CP053300	468802	469359	No_name	spermidine N1-acetyltransferase	PFAM GCN5-related N-acetyltransferase	speG	0.00567662	1.52567	0.201878	DMSO	0.0362112	1.70757	0.221771	Amp	1.20679	-0.176354	0.868585	0.981699	Not_Sig		0.0305346
K562_RS02245	K562_RS02245	CP053300	469847	470194	No_name	hypothetical protein	0	0	-0.521842	1.97398	0.507725	DMSO	-0.38531	2.26718	0.759925	Amp	2.24018	-0.258751	0.808597	0.975516	Not_Sig		0.136532
K562_RS02250	K562_RS02250	CP053300	470383	470937	No_name	YaeQ family protein	PFAM YaeQ family protein	yaeQ	0.18526	2.06358	0.265352	DMSO	0.242308	1.95769	0.32154	Amp	1.46834	-0.237015	0.824289	0.977153	Not_Sig		0.0570479
K562_RS02255	K562_RS02255	CP053300	470959	471372	No_name	VOC family protein	PFAM Glyoxalase bleomycin resistance protein dioxygenase	0	1.16177	0.35939	0.268503	DMSO	1.5551	0.0214492	0.15468	Amp	3.01324	-2.19855	0.0928026	0.672835	Not_Sig		0.393329
K562_RS02260	K562_RS02260	CP053300	471804	472895	No_name	bifunctional DNA-binding transcriptional regulator/O6-methylguanine-DNA methyltransferase Ada	Involved in the cellular defense against the biological effects of O6-methylguanine (O6-MeG) and O4-methylthymine (O4-MeT) in DNA. Repairs the methylated nucleobase in DNA by stoichiometrically transferring the methyl group to a cysteine residue in the enzyme. This is a suicide reaction the enzyme is irreversibly inactivated	ada	0.574725	1.05677	0.365634	DMSO	0.66344	1.01976	0.552118	Amp	2.28019	-0.23204	0.827895	0.977153	Not_Sig		0.0887153
K562_RS02265	K562_RS02265	CP053300	472892	473851	No_name	3-methyladenine DNA glycosylase 2	AlkA domain protein	0	0.320548	1.74578	0.776441	DMSO	-0.67836	3.71884	0.316241	Amp	6.02809	2.06371	0.107997	0.683949	Not_Sig		-0.998908
K562_RS02270	K562_RS02270	CP053300	474317	475930	No_name	glutamate--cysteine ligase	Belongs to the glutamate--cysteine ligase type 1 family. Type 1 subfamily	gshA	-0.63354	2.05474	0.587731	DMSO	-0.809122	2.30492	0.547888	Amp	1.15073	0.378492	0.724296	0.965921	Not_Sig		-0.175582
K562_RS02275	K562_RS02275	CP053300	476018	476335	No_name	DUF4148 domain-containing protein	Domain of unknown function (DUF4148)	0	1.72233	0.0374993	0.105708	DMSO	1.43004	0.0442707	0.267533	Amp	6.40537	1.75994	0.153227	0.734382	Not_Sig		-0.292292
K562_RS02280	K562_RS02280	CP053300	476758	478398	No_name	L-lactate permease	permease	0	0.167219	1.54872	0.18153	DMSO	0.425182	1.42689	0.175239	Amp	1.07309	-1.77084	0.151292	0.730997	Not_Sig		0.257963
K562_RS02285	K562_RS02285	CP053300	478495	479430	No_name	LysR family transcriptional regulator	Transcriptional regulator	0	-0.210795	1.85819	0.0975222	DMSO	-0.261627	1.59044	0.169431	Amp	3.01843	0.450372	0.675774	0.963653	Not_Sig		-0.0508326
K562_RS02290	K562_RS02290	CP053300	479660	481831	No_name	phospholipase C	phospholipase C	0	0.274722	1.3357	0.189597	DMSO	0.191551	1.37229	0.141972	Amp	1.78344	0.608187	0.575905	0.948571	Not_Sig		-0.0831705
K562_RS02295	K562_RS02295	CP053300	482027	482752	No_name	phosphonate utilization associated transcriptional regulator	Phosphonate utilization associated transcriptional regulator	0	0.268913	0.744406	0.629559	DMSO	0.617053	0.53703	0.289576	Amp	4.72659	-0.870169	0.433312	0.915872	Not_Sig		0.34814
K562_RS02300	K562_RS02300	CP053300	482852	484240	No_name	FAD-dependent oxidoreductase	FAD dependent oxidoreductase	0	0.478301	1.38886	0.465617	DMSO	0.544861	1.2772	0.173088	Amp	7.23637	-0.232081	0.827865	0.977153	Not_Sig		0.0665604
K562_RS02305	K562_RS02305	CP053300	484336	485466	No_name	2-aminoethylphosphonate--pyruvate transaminase	Belongs to the class-V pyridoxal-phosphate-dependent aminotransferase family. PhnW subfamily	0	0.530877	1.49311	0.2389	DMSO	0.845597	0.631264	0.296677	Amp	1.54218	-1.43108	0.225654	0.798633	Not_Sig		0.31472
K562_RS02310	K562_RS02310	CP053300	485514	487241	No_name	putative 2-aminoethylphosphonate ABC transporterpermease subunit	permease	0	0.341443	1.47899	0.78191	DMSO	-0.0538087	1.55316	0.630388	Amp	1.5385	0.681613	0.532904	0.940833	Not_Sig		-0.395252
K562_RS02315	K562_RS02315	CP053300	487238	488320	No_name	putative 2-aminoethylphosphonate ABC transporterATP-binding protein	Belongs to the ABC transporter superfamily	0	0.251092	2.22788	0.400414	DMSO	0.672371	1.68101	0.188954	Amp	4.49062	-1.64802	0.174693	0.756893	Not_Sig		0.421279
K562_RS02320	K562_RS02320	CP053300	488418	489473	No_name	putative 2-aminoethylphosphonate ABC transportersubstrate-binding protein	transporter	0	0.281987	1.43913	0.323779	DMSO	0.0996174	1.59466	0.311767	Amp	1.07854	0.702754	0.520955	0.940165	Not_Sig		-0.182369
K562_RS02325	K562_RS02325	CP053300	489683	490921	No_name	phosphonoacetate hydrolase	phosphonoacetate hydrolase	0	0.0798579	1.38754	0.259843	DMSO	0.575602	0.936049	0.141269	Amp	3.38319	-2.90319	0.043977	0.561021	Sig		0.495744
K562_RS02335	K562_RS02335	CP053300	492585	493367	No_name	amino acid ABC transporter substrate-binding protein	Bacterial periplasmic substrate-binding proteins	0	-0.278033	2.01132	0.498664	DMSO	-0.48324	1.74861	0.899228	Amp	3.2518	0.345667	0.747007	0.967973	Not_Sig		-0.205207
K562_RS02340	K562_RS02340	CP053300	493382	494062	No_name	amino acid ABC transporter permease	TIGRFAM polar amino acid ABC transporter, inner membrane subunit	0	-0.819115	1.57363	0.809708	DMSO	0.234063	0.237239	0.0735889	Amp	121.069	NA	NA	NA	Not_tested		1.05318
K562_RS02345	K562_RS02345	CP053300	494059	494817	No_name	amino acid ABC transporter ATP-binding protein	ABC transporter	0	1.19247	1.03079	0.831266	DMSO	0.357692	1.07851	0.322752	Amp	6.63349	1.62143	0.180242	0.763216	Not_Sig		-0.834775
K562_RS02350	K562_RS02350	CP053300	494842	495657	No_name	alpha/beta fold hydrolase	Serine aminopeptidase, S33	0	-0.120457	1.97324	0.128153	DMSO	-0.279271	1.66264	0.193615	Amp	2.28258	1.18471	0.301712	0.851199	Not_Sig		-0.158813
K562_RS02355	K562_RS02355	CP053300	495740	496354	No_name	CGNR zinc finger domain-containing protein	CGNR zinc finger	0	1.72207	0.00114954	0.124115	DMSO	0.927216	0.391983	0.366919	Amp	8.73956	3.55428	0.0237074	0.476428	Sig		-0.794851
K562_RS02360	K562_RS02360	CP053300	496391	497437	No_name	DUF3592 domain-containing protein	Protein of unknown function (DUF3592)	0	0.311903	1.66683	0.403486	DMSO	-0.348229	2.1905	0.371658	Amp	1.17861	2.08429	0.105509	0.683949	Not_Sig		-0.660132
K562_RS02365	K562_RS02365	CP053300	497629	497704	No_name	tRNA-Lys	#N/A	#N/A	0.717928	1.66683	0.883618	DMSO	0.927927	2.1905	0.191714	Amp	21.2432	-0.402276	0.708051	0.965336	Not_Sig		0.209999
K562_RS02370	K562_RS02370	CP053300	497895	498299	No_name	PaaI family thioesterase	PFAM thioesterase superfamily protein	0	-0.20247	0.513654	0.630909	DMSO	0.540915	0.909653	0.431553	Amp	2.1373	-1.68447	0.167376	0.74872	Not_Sig		0.743385
K562_RS02375	K562_RS02375	CP053300	498308	499174	No_name	patatin-like phospholipase family protein	PFAM Patatin	0	1.056	0.410686	0.37076	DMSO	0.512116	0.940182	0.26488	Amp	1.95924	2.06741	0.107545	0.683949	Not_Sig		-0.543883
K562_RS02380	K562_RS02380	CP053300	499223	500236	No_name	D-2-hydroxyacid dehydrogenase family protein	D-isomer specific 2-hydroxyacid dehydrogenase	serA	-0.21218	1.62734	0.200986	DMSO	-0.37528	1.84841	0.214137	Amp	1.13515	0.961909	0.390567	0.902492	Not_Sig		-0.1631
K562_RS02385	K562_RS02385	CP053300	500664	501713	No_name	LysR family transcriptional regulator	Transcriptional regulator, LysR family	0	-1.08684	1.68061	0.388218	DMSO	0.142386	1.48127	0.466626	Amp	1.44473	-3.50754	0.0247269	0.483563	Sig		1.22923
K562_RS02390	K562_RS02390	CP053300	501845	504442	No_name	DNA topoisomerase III	dna topoisomerase III	topB	-1.47571	1.07351	0.916918	DMSO	-0.87221	0.130975	0.427196	Amp	4.60688	-1.03335	0.359819	0.886667	Not_Sig		0.603499
K562_RS02400	K562_RS02400	CP053300	505052	506365	No_name	DNA-protecting protein DprA	DNA protecting protein DprA	dprA	-0.295938	1.6734	0.252834	DMSO	-0.561539	2.03273	0.427526	Amp	2.85927	0.926196	0.406767	0.914002	Not_Sig		-0.265601
K562_RS02405	K562_RS02405	CP053300	506551	507054	No_name	peptide deformylase	Removes the formyl group from the N-terminal Met of newly synthesized proteins. Requires at least a dipeptide for an efficient rate of reaction. N-terminal L-methionine is a prerequisite for activity but the enzyme has broad specificity at other positions	def	-1.50834	2.13043	0.57067	DMSO	-2.29548	1.48265	0.169069	Amp	11.3931	2.29064	0.0837976	0.665206	Not_Sig		-0.787139
K562_RS02415	K562_RS02415	CP053300	508202	508843	No_name	LysE family translocator	PFAM Lysine exporter protein (LYSE YGGA)	0	-0.017543	1.56368	0.0393829	DMSO	-0.29875	1.56032	0.139838	Amp	12.6076	3.35265	0.0284987	0.492199	Sig		-0.281207
K562_RS02420	K562_RS02420	CP053300	508943	509800	No_name	zinc metalloprotease HtpX	Belongs to the peptidase M48B family	htpX	-3.97598	1.56368	0.517379	DMSO	-4.22526	1.56032	0.393567	Amp	1.72815	0.664182	0.542903	0.942121	Not_Sig		-0.249275
K562_RS02425	K562_RS02425	CP053300	510021	511412	No_name	16S rRNA (cytosine(967)-C(5))-methyltransferase RsmB	Specifically methylates the cytosine at position 967 (m5C967) of 16S rRNA	sun	-1.38375	2.68433	0.536926	DMSO	-0.319797	2.38411	0.393483	Amp	1.86199	-2.76837	0.0504151	0.583474	Not_Sig		1.06396
K562_RS02430	K562_RS02430	CP053300	511409	511999	No_name	DUF4390 domain-containing protein	signal peptide protein	0	-2.088	2.2799	0.783677	DMSO	0.0340263	2.18836	0.38709	Amp	4.09874	-4.20503	0.0136406	0.399708	Sig		2.12203
K562_RS02435	K562_RS02435	CP053300	511989	514403	No_name	PAS domain-containing sensor histidine kinase	Histidine kinase	0	-1.6885	2.81965	0.410554	DMSO	-0.0751698	1.80789	0.120065	Amp	11.6924	-6.53272	0.00283664	0.2238	Sig		1.61333
K562_RS02450	K562_RS02450	CP053300	515593	516327	No_name	7-cyano-7-deazaguanine synthase QueC	Catalyzes the ATP-dependent conversion of 7-carboxy-7- deazaguanine (CDG) to 7-cyano-7-deazaguanine (preQ(0))	queC	-0.539206	1.85561	0.408699	DMSO	-0.813134	1.80725	0.485231	Amp	1.40958	0.747864	0.496113	0.930894	Not_Sig		-0.273928
K562_RS02455	K562_RS02455	CP053300	516403	517035	No_name	7-carboxy-7-deazaguanine synthase	Catalyzes the complex heterocyclic radical-mediated conversion of 6-carboxy-5,6,7,8-tetrahydropterin (CPH4) to 7- carboxy-7-deazaguanine (CDG), a step common to the biosynthetic pathways of all 7-deazapurine-containing compounds	queE	-0.966589	1.83296	0.205733	DMSO	-1.25261	2.10873	0.149341	Amp	1.89779	1.94867	0.123144	0.701005	Not_Sig		-0.286017
K562_RS02460	K562_RS02460	CP053300	517054	517506	No_name	6-carboxytetrahydropterin synthase QueD	synthase	queD	-0.526818	1.58591	0.520227	DMSO	-0.348116	1.48806	0.111098	Amp	21.9265	-0.581853	0.591882	0.948699	Not_Sig		0.178702
K562_RS02465	K562_RS02465	CP053300	517833	518618	No_name	HpcH/HpaI aldolase/citrate lyase family protein	Belongs to the HpcH HpaI aldolase family	garL	-1.47487	3.03015	0.501291	DMSO	-0.164818	1.58258	1.00322	Amp	4.00506	-2.02327	0.113076	0.689076	Not_Sig		1.31005
K562_RS02470	K562_RS02470	CP053300	518615	519367	No_name	sel1 repeat family protein	PFAM Sel1 domain protein repeat-containing protein	0	0.5917	0.775279	0.212368	DMSO	0.230584	1.36684	0.518732	Amp	5.96638	1.11587	0.326986	0.871472	Not_Sig		-0.361115
K562_RS02480	K562_RS02480	CP053300	520606	522876	No_name	penicillin-binding protein 2	Catalyzes cross-linking of the peptidoglycan cell wall	mrdA	2.97434	0.775279	3.32504	DMSO	3.29904	1.36684	2.92702	Amp	1.29045	-0.12696	0.905098	0.985229	Not_Sig		0.324708
K562_RS02490	K562_RS02490	CP053300	523487	524551	No_name	rod shape-determining protein MreC	shape-determining protein MreC	mreC	2.16076	0.775279	0.294657	DMSO	2.00038	1.36684	0.653781	Amp	4.923	0.387357	0.71822	0.965921	Not_Sig		-0.160376
K562_RS02500	K562_RS02500	CP053300	526101	526400	No_name	Asp-tRNA(Asn)/Glu-tRNA(Gln) amidotransferase subunit GatC	Allows the formation of correctly charged Asn-tRNA(Asn) or Gln-tRNA(Gln) through the transamidation of misacylated Asp- tRNA(Asn) or Glu-tRNA(Gln) in organisms which lack either or both of asparaginyl-tRNA or glutaminyl-tRNA synthetases. The reaction takes place in the presence of glutamine and ATP through an activated phospho-Asp-tRNA(Asn) or phospho-Glu-tRNA(Gln)	gatC	-0.318086	0.775279	0.288551	DMSO	-2.09135	1.36684	0.346913	Amp	1.44542	6.80666	0.00243428	0.211605	Sig		-1.77326
K562_RS02515	K562_RS02515	CP053300	529559	530398	No_name	polyphosphate kinase 2 family protein	Polyphosphate kinase 2 (PPK2)	0	-0.0161085	1.03496	0.662427	DMSO	-0.0875142	1.25503	0.229115	Amp	8.35927	0.176449	0.868515	0.981699	Not_Sig		-0.0714058
K562_RS02520	K562_RS02520	CP053300	530439	531212	No_name	exodeoxyribonuclease III	Exodeoxyribonuclease III	0	-0.517895	2.11212	0.764429	DMSO	-0.293722	2.13662	0.581669	Amp	1.72712	-0.404218	0.706732	0.965336	Not_Sig		0.224173
K562_RS02525	K562_RS02525	CP053300	531320	532372	No_name	NAD(P)-dependent alcohol dehydrogenase	PFAM Alcohol dehydrogenase zinc-binding domain protein	0	0.182048	1.11379	0.383679	DMSO	-0.176767	1.48856	0.24581	Amp	2.43633	1.3639	0.244305	0.815392	Not_Sig		-0.358815
K562_RS02530	K562_RS02530	CP053300	532599	533543	No_name	AraC family transcriptional regulator	AraC-type transcriptional regulator domain protein	0	-0.138419	1.70522	0.0756171	DMSO	-0.445477	1.71723	0.175985	Amp	5.4164	2.77661	0.0499916	0.581021	Sig		-0.307058
K562_RS02535	K562_RS02535	CP053300	533566	534606	No_name	M48 family metallopeptidase	Peptidase M48	0	-0.285743	1.23954	0.639809	DMSO	0.0532975	0.986513	0.611376	Amp	1.09518	-0.663581	0.54325	0.942121	Not_Sig		0.339041
K562_RS02540	K562_RS02540	CP053300	534596	536017	No_name	AmpG family muropeptide MFS transporter	Major facilitator Superfamily	ampG	-0.777116	1.83693	0.73701	DMSO	-2.79713	1.371	0.210311	Amp	12.2807	4.56502	0.0102996	0.366937	Sig		-2.02001
K562_RS02545	K562_RS02545	CP053300	536134	536742	No_name	methionine biosynthesis protein MetW	Methionine biosynthesis protein MetW	metW	-0.26917	1.45033	0.531978	DMSO	-0.479139	1.85291	0.360803	Amp	2.17394	0.565779	0.601774	0.952099	Not_Sig		-0.209969
K562_RS02550	K562_RS02550	CP053300	536739	537884	No_name	homoserine O-acetyltransferase	Transfers a succinyl group from succinyl-CoA to L- homoserine, forming succinyl-L-homoserine	metXS	0.351785	1.42874	0.157753	DMSO	0.328131	1.42276	0.222819	Amp	1.99505	0.150068	0.887974	0.984305	Not_Sig		-0.023654
K562_RS02555	K562_RS02555	CP053300	538151	538816	No_name	nucleoid occlusion factor SlmA	PFAM regulatory protein TetR	ttk	0.127309	1.00604	0.525852	DMSO	0.597733	1.48208	0.473002	Amp	1.23595	-1.15201	0.313485	0.863104	Not_Sig		0.470424
K562_RS02560	K562_RS02560	CP053300	538783	539574	No_name	pyrimidine 5'-nucleotidase	had-superfamily hydrolase subfamily ia, variant 3	0	0.0230695	1.71328	0.395305	DMSO	-0.273547	1.46072	0.224021	Amp	3.11378	1.1307	0.321384	0.865861	Not_Sig		-0.296616
K562_RS02565	K562_RS02565	CP053300	539571	540470	No_name	acetylglutamate kinase	Belongs to the acetylglutamate kinase family. ArgB subfamily	argB	-0.258922	1.96911	0.351156	DMSO	-0.339206	1.70475	0.704296	Amp	4.02263	0.176695	0.868334	0.981699	Not_Sig		-0.0802839
K562_RS02570	K562_RS02570	CP053300	540765	540989	No_name	cysteine-rich CWC family protein	Cysteine-rich CWC	0	-2.63992	1.96911	0.688456	DMSO	-1.64048	1.70475	0.23148	Amp	8.8456	-2.38333	0.0757149	0.657828	Not_Sig		0.99944
K562_RS02575	K562_RS02575	CP053300	541081	542511	No_name	HAMP domain-containing histidine kinase	histidine kinase A domain protein	0	0.985614	0.706847	0.261919	DMSO	0.929835	0.86458	0.0401711	Amp	42.5115	NA	NA	NA	Not_tested		-0.0557798
K562_RS02580	K562_RS02580	CP053300	542525	543067	No_name	response regulator transcription factor	response regulator	0	0.741555	1.68963	0.481274	DMSO	1.28066	0.367006	0.428436	Amp	1.26187	-1.44914	0.220887	0.790752	Not_Sig		0.539101
K562_RS02585	K562_RS02585	CP053300	543135	544478	No_name	ATP-dependent protease ATPase subunit HslU	this subunit has chaperone activity. The binding of ATP and its subsequent hydrolysis by HslU are essential for unfolding of protein substrates subsequently hydrolyzed by HslV. HslU recognizes the N-terminal part of its protein substrates and unfolds these before they are guided to HslV for hydrolysis	hslU	-0.472086	1.92413	0.254314	DMSO	-0.520264	1.64883	0.493572	Amp	3.7667	0.150292	0.887808	0.984305	Not_Sig		-0.0481786
K562_RS02590	K562_RS02590	CP053300	544488	545024	No_name	ATP-dependent protease subunit HslV	Protease subunit of a proteasome-like degradation complex believed to be a general protein degrading machinery	hslV	0.16932	0.928668	0.166779	DMSO	0.690377	0.273578	0.526877	Amp	9.98012	-1.63306	0.177795	0.760447	Not_Sig		0.521057
K562_RS02600	K562_RS02600	CP053300	546172	547347	No_name	GTP-binding protein	#N/A	#N/A	-0.0373932	1.69907	0.187674	DMSO	0.17063	1.60491	0.0978017	Amp	3.68227	-1.70254	0.163866	0.745465	Not_Sig		0.208023
K562_RS02605	K562_RS02605	CP053300	547444	548658	No_name	class I SAM-dependent rRNA methyltransferase	catalyzes the methylation of cytosine at position 1962 of the 23S rRNA	0	0.0443015	1.44189	0.320443	DMSO	0.334391	1.29718	0.614097	Amp	3.67258	-0.725376	0.508385	0.936979	Not_Sig		0.290089
K562_RS02610	K562_RS02610	CP053300	548735	549655	No_name	tyrosine recombinase XerC	Belongs to the 'phage' integrase family. XerC subfamily	xerC	-2.24214	2.0308	0.830192	DMSO	-2.9003	1.50746	1.00936	Amp	1.4782	0.872269	0.432293	0.915703	Not_Sig		-0.658167
K562_RS02615	K562_RS02615	CP053300	549669	550394	No_name	DUF484 family protein	Protein of unknown function, DUF484	0	1.72409	2.0308	0.154475	DMSO	1.23988	1.50746	0.442919	Amp	8.22115	1.78792	0.148309	0.725963	Not_Sig		-0.484216
K562_RS02630	K562_RS02630	CP053300	552808	553995	No_name	methionine adenosyltransferase	Catalyzes the formation of S-adenosylmethionine (AdoMet) from methionine and ATP. The overall synthetic reaction is composed of two sequential steps, AdoMet formation and the subsequent tripolyphosphate hydrolysis which occurs prior to release of AdoMet from the enzyme	metK	1.14694	2.0308	0.459123	DMSO	0.8839	1.50746	0.517668	Amp	1.27129	0.658443	0.546224	0.943245	Not_Sig		-0.263041
K562_RS02635	K562_RS02635	CP053300	554107	554448	No_name	hypothetical protein	0	0	1.21505	0.17309	0.322175	DMSO	0.903596	0.125251	0.119434	Amp	7.27659	1.57002	0.191498	0.76625	Not_Sig		-0.311457
K562_RS02640	K562_RS02640	CP053300	554801	555574	No_name	phytanoyl-CoA dioxygenase family protein	Phytanoyl-CoA dioxygenase	0	-0.162536	1.55225	0.426888	DMSO	-0.593079	2.07081	0.282523	Amp	2.28307	1.45674	0.218911	0.788611	Not_Sig		-0.430543
K562_RS02645	K562_RS02645	CP053300	555735	555941	No_name	DUF3185 family protein	Protein of unknown function (DUF3185)	0	-1.58929	2.67472	0.994106	DMSO	-1.32798	2.77779	0.764358	Amp	1.6915	-0.360926	0.736409	0.967973	Not_Sig		0.261307
K562_RS02650	K562_RS02650	CP053300	556135	557178	No_name	L-glyceraldehyde 3-phosphate reductase	aldo keto reductase	0	0.0665821	1.46617	0.423005	DMSO	0.0161137	1.63043	0.157078	Amp	7.25204	0.193724	0.855832	0.981647	Not_Sig		-0.0504684
K562_RS02655	K562_RS02655	CP053300	557285	557470	No_name	hypothetical protein	0	0	0.688731	0.92906	0.561103	DMSO	0.766606	0.851746	0.699482	Amp	1.55406	-0.150419	0.887714	0.984305	Not_Sig		0.0778753
K562_RS02660	K562_RS02660	CP053300	557824	558711	No_name	DMT family transporter	EamA-like transporter family	0	0.0192302	1.42075	0.426555	DMSO	0.673761	0.592335	0.610381	Amp	2.04763	-1.52242	0.202564	0.775948	Not_Sig		0.654531
K562_RS02665	K562_RS02665	CP053300	559520	559732	No_name	hypothetical protein	0	0	0.819848	0.19868	0.158549	DMSO	1.19927	0.104871	0.289675	Amp	3.33805	-1.99006	0.117443	0.693862	Not_Sig		0.379417
K562_RS02670	K562_RS02670	CP053300	559789	560811	No_name	serine/threonine protein kinase	#N/A	#N/A	-0.240647	1.64437	0.0178659	DMSO	0.419301	0.452316	0.524735	Amp	862.637	NA	NA	NA	Not_tested		0.659948
K562_RS02675	K562_RS02675	CP053300	560878	562320	No_name	coniferyl aldehyde dehydrogenase	belongs to the aldehyde dehydrogenase family	calB	0.565135	0.899656	0.345807	DMSO	0.0224597	1.54893	0.708126	Amp	4.19327	1.19274	0.298886	0.84859	Not_Sig		-0.542675
K562_RS02680	K562_RS02680	CP053300	562317	562823	No_name	hypothetical protein	#N/A	#N/A	1.3224	0.0143643	0.147776	DMSO	1.24471	0.325743	0.699899	Amp	22.4319	0.188124	0.859938	0.981647	Not_Sig		-0.0776942
K562_RS02685	K562_RS02685	CP053300	563047	564687	No_name	GMC family oxidoreductase N-terminal domain-containing protein	Belongs to the GMC oxidoreductase family	0	1.32798	0.0337872	0.0966092	DMSO	0.784321	0.489244	0.292576	Amp	9.17151	3.05616	0.0378001	0.532503	Sig		-0.543659
K562_RS02690	K562_RS02690	CP053300	564717	566075	No_name	flagellar hook-length control protein FliK	Flagellar hook-length control protein	fliK	0.871311	0.304187	0.209935	DMSO	0.824173	0.538814	0.505047	Amp	5.78753	0.149275	0.88856	0.984305	Not_Sig		-0.0471377
K562_RS02695	K562_RS02695	CP053300	566107	566565	No_name	flagellar export protein FliJ	Flagellar export protein FliJ	fliJ	1.46521	0.106936	0.578854	DMSO	1.14083	0.138443	0.0977476	Amp	35.0691	0.957066	0.392732	0.90491	Not_Sig		-0.324381
K562_RS02700	K562_RS02700	CP053300	566571	568115	No_name	flagellar protein export ATPase FliI	PFAM H transporting two-sector ATPase alpha beta subunit central region	fliI	0.205482	1.19986	0.441181	DMSO	0.176419	1.57625	0.357254	Amp	1.52503	0.0886713	0.933605	0.991734	Not_Sig		-0.0290625
K562_RS02705	K562_RS02705	CP053300	568109	568792	No_name	flagellar assembly protein FliH	Flagellar assembly protein flih	fliH	1.52276	0.101985	0.175009	DMSO	2.00604	0.130629	0.918188	Amp	27.526	-0.895524	0.421127	0.915703	Not_Sig		0.483278
K562_RS02710	K562_RS02710	CP053300	568785	569780	No_name	flagellar motor switch protein FliG	flagellar motor switch protein flig	fliG	0.01327	2.01624	0.341273	DMSO	0.0352208	2.20876	0.45737	Amp	1.7961	-0.0666241	0.950078	0.995107	Not_Sig		0.0219507
K562_RS02715	K562_RS02715	CP053300	569770	571533	No_name	flagellar M-ring protein FliF	The M ring may be actively involved in energy transduction	fliF	0.802625	1.30107	0.29957	DMSO	1.39663	0.886698	0.563398	Amp	3.537	-1.61239	0.182172	0.763216	Not_Sig		0.594007
K562_RS02720	K562_RS02720	CP053300	571782	572126	No_name	flagellar hook-basal body complex protein FliE	Flagellar hook-basal body complex protein FliE	fliE	0.945797	0.243733	0.333727	DMSO	-0.187251	1.8625	0.264834	Amp	1.58794	4.60636	0.00998297	0.359996	Sig		-1.13305
K562_RS02725	K562_RS02725	CP053300	572366	572800	No_name	flagellar export chaperone FliS	flagellar protein FliS	fliS	0.738457	1.366	0.603217	DMSO	0.331893	1.12994	1.19192	Amp	3.90432	0.527141	0.625978	0.957139	Not_Sig		-0.406564
K562_RS02730	K562_RS02730	CP053300	572797	573129	No_name	flagellar protein FliT	flagellar	fliT	1.19161	0.600891	0.704091	DMSO	0.448488	0.952156	0.711311	Amp	1.02061	1.28602	0.26783	0.834535	Not_Sig		-0.743119
K562_RS02735	K562_RS02735	CP053300	573262	574614	No_name	flagellar hook-length control protein FliK	Flagellar hook-length control protein FliK	0	1.63755	0.160999	0.63819	DMSO	0.838532	0.646159	1.04082	Amp	2.65984	1.13353	0.320323	0.865299	Not_Sig		-0.799014
K562_RS02740	K562_RS02740	CP053300	574611	574928	No_name	EscU/YscU/HrcU family type III secretion system export apparatus switch protein	FlhB HrpN YscU SpaS Family	0	0.466627	2.7012	0.530234	DMSO	0.607192	2.89293	0.849383	Amp	2.56609	-0.243149	0.81985	0.977153	Not_Sig		0.140565
K562_RS02745	K562_RS02745	CP053300	575198	575932	No_name	PepSY-associated TM helix domain-containing protein	PFAM PepSY-associated TM helix domain protein	0	-0.0530286	1.53525	0.0490351	DMSO	0.105797	2.39866	0.310808	Amp	40.1762	NA	NA	NA	Not_tested		0.158826
K562_RS02750	K562_RS02750	CP053300	575990	577015	No_name	XdhC family protein	XdhC and CoxI family	coxI	0.57499	0.654851	0.136791	DMSO	0.590673	0.687218	0.14196	Amp	1.077	-0.137782	0.89707	0.984911	Not_Sig		0.0156823
K562_RS02755	K562_RS02755	CP053300	577267	578673	No_name	amino acid permease	amino acid	0	0.294577	1.44515	0.435738	DMSO	0.365592	1.36571	0.434761	Amp	1.0045	-0.199826	0.851364	0.981647	Not_Sig		0.0710143
K562_RS02760	K562_RS02760	CP053300	578889	579545	No_name	response regulator transcription factor	regulator	0	0.67224	0.955936	0.291603	DMSO	0.774102	1.30714	0.415932	Amp	2.03451	-0.347327	0.745851	0.967973	Not_Sig		0.101862
K562_RS02765	K562_RS02765	CP053300	579553	580368	No_name	ATP-binding protein	PFAM ATP-binding region, ATPase domain protein	0	0.543679	0.972842	0.945526	DMSO	0.110701	1.38173	0.748046	Amp	1.59768	0.62202	0.567628	0.948418	Not_Sig		-0.432977
K562_RS02775	K562_RS02775	CP053300	581863	582678	No_name	endonuclease/exonuclease/phosphatase family protein	Endonuclease Exonuclease phosphatase	0	-0.403862	2.47781	0.573962	DMSO	-0.417668	2.45111	0.328416	Amp	3.05433	0.0361607	0.972887	0.997585	Not_Sig		-0.0138058
K562_RS02780	K562_RS02780	CP053300	582684	583172	No_name	hypothetical protein	0	0	-0.774753	1.39542	0.272369	DMSO	-0.718187	1.81794	0.393856	Amp	2.09102	-0.204597	0.847876	0.981647	Not_Sig		0.0565651
K562_RS02785	K562_RS02785	CP053300	583319	584047	No_name	nitroreductase	nitroreductase	nfnB	-0.108334	1.99319	0.727875	DMSO	-0.170284	1.68203	0.452762	Amp	2.58448	0.125176	0.906423	0.986302	Not_Sig		-0.0619502
K562_RS02790	K562_RS02790	CP053300	584297	585277	No_name	AAA family ATPase	PFAM AAA ATPase central domain protein	0	-0.0198435	1.43043	0.234685	DMSO	-0.538564	2.18654	0.219763	Amp	1.14041	2.79441	0.0490906	0.581021	Sig		-0.518721
K562_RS02795	K562_RS02795	CP053300	585454	586563	No_name	NAD(P)/FAD-dependent oxidoreductase	Fad dependent oxidoreductase	0	0.576844	1.31704	0.219125	DMSO	0.40718	1.48954	0.431908	Amp	3.88509	0.606771	0.576757	0.948571	Not_Sig		-0.169665
K562_RS02800	K562_RS02800	CP053300	586724	587035	No_name	high-potential iron-sulfur protein	Specific class of high-redox-potential 4Fe-4S ferredoxins. Functions in anaerobic electron transport in most purple and in some other photosynthetic bacteria and in at least one genus (Paracoccus) of halophilic, denitrifying bacteria	hip	-0.43435	2.4304	0.288006	DMSO	-0.675055	2.44908	0.146297	Amp	3.87553	1.29062	0.266383	0.832219	Not_Sig		-0.240704
K562_RS02805	K562_RS02805	CP053300	587227	588534	No_name	MFS transporter	Major Facilitator	0	0.112006	1.23965	0.0919426	DMSO	-0.275133	1.29952	0.355139	Amp	14.9198	1.82785	0.14158	0.720094	Not_Sig		-0.387139
K562_RS02810	K562_RS02810	CP053300	588856	590484	No_name	ABC transporter substrate-binding protein	PFAM extracellular solute-binding protein, family 5	dppA	0.404203	1.28193	0.129163	DMSO	0.447166	1.30695	0.179331	Amp	1.92767	-0.336705	0.753263	0.970101	Not_Sig		0.0429625
K562_RS02815	K562_RS02815	CP053300	590595	591605	No_name	ABC transporter permease subunit	PFAM binding-protein-dependent transport systems inner membrane component	dppB	0.571483	0.717612	0.544034	DMSO	-0.180264	1.85756	0.254333	Amp	4.57559	2.16813	0.0960109	0.674479	Not_Sig		-0.751748
K562_RS02820	K562_RS02820	CP053300	591610	592527	No_name	ABC transporter permease subunit	PFAM binding-protein-dependent transport systems inner membrane component	dppC	1.21601	0.0272422	0.159033	DMSO	1.1196	0.0188403	0.21016	Amp	1.74633	0.633653	0.560731	0.946476	Not_Sig		-0.096417
K562_RS02825	K562_RS02825	CP053300	592530	593528	No_name	ABC transporter ATP-binding protein	Belongs to the ABC transporter superfamily	dppD	-0.580663	2.21824	0.625627	DMSO	-1.08255	1.10877	0.295512	Amp	4.48209	1.25637	0.277353	0.836015	Not_Sig		-0.501884
K562_RS02830	K562_RS02830	CP053300	593525	594538	No_name	ABC transporter ATP-binding protein	Belongs to the ABC transporter superfamily	dppF	-0.17354	1.45611	0.105524	DMSO	0.689473	0.705183	0.193538	Amp	3.36378	-6.78101	0.00246884	0.211605	Sig		0.863013
K562_RS02835	K562_RS02835	CP053300	594531	595676	No_name	TraB/GumN family protein	PFAM GumN family protein	0	0.0392912	1.29238	0.506264	DMSO	0.14618	1.62599	0.221323	Amp	5.23238	-0.335071	0.754406	0.970748	Not_Sig		0.106888
K562_RS02840	K562_RS02840	CP053300	596235	596999	No_name	5-oxoprolinase subunit PxpA	Belongs to the UPF0271 (lamB) family	0	0.406928	0.707449	0.35851	DMSO	0.294477	0.872912	0.131065	Amp	7.48218	0.510246	0.636746	0.959237	Not_Sig		-0.11245
K562_RS02845	K562_RS02845	CP053300	597056	598123	No_name	biotin-dependent carboxyltransferase family protein	Allophanate hydrolase	0	-0.0876787	1.92789	0.093551	DMSO	-0.643152	2.36523	0.542585	Amp	33.6387	1.74741	0.155486	0.734483	Not_Sig		-0.555474
K562_RS02850	K562_RS02850	CP053300	598120	598776	No_name	5-oxoprolinase subunit PxpB	PFAM Allophanate hydrolase subunit 1	0	1.26254	0.0370214	0.131347	DMSO	0.983865	0.11592	0.149391	Amp	1.29361	2.42649	0.0722541	0.645906	Not_Sig		-0.278676
K562_RS02855	K562_RS02855	CP053300	598923	599435	No_name	winged helix DNA-binding protein	PFAM regulatory protein, MarR	0	0.396783	1.55063	0.0730954	DMSO	0.339672	1.33728	0.263008	Amp	12.9467	0.362372	0.735409	0.967973	Not_Sig		-0.0571109
K562_RS02860	K562_RS02860	CP053300	599511	600119	No_name	5-formyltetrahydrofolate cyclo-ligase	Belongs to the 5-formyltetrahydrofolate cyclo-ligase family	0	1.11519	0.00282039	0.0588139	DMSO	0.686397	0.0201308	0.17826	Amp	9.18649	3.95651	0.0167265	0.417234	Sig		-0.428789
K562_RS02865	K562_RS02865	CP053300	600128	602080	No_name	lytic transglycosylase domain-containing protein	lytic transglycosylase	slt	-0.634928	2.0275	0.365699	DMSO	-0.274063	2.01431	0.347511	Amp	1.10741	-1.23897	0.283089	0.84342	Not_Sig		0.360865
K562_RS02870	K562_RS02870	CP053300	602131	603090	No_name	complex I NDUFA9 subunit family protein	Nad-dependent epimerase dehydratase	0	-1.18344	2.14099	0.696238	DMSO	-1.70039	3.58855	0.21187	Amp	10.7988	1.23033	0.285982	0.844381	Not_Sig		-0.51695
K562_RS02875	K562_RS02875	CP053300	603153	603800	No_name	glutathione S-transferase family protein	Glutathione S-transferase	0	1.23562	0.230267	0.49175	DMSO	-0.877416	1.97257	1.36339	Amp	7.68689	2.52517	0.064998	0.621951	Not_Sig		-2.11303
K562_RS02885	K562_RS02885	CP053300	605078	605845	No_name	helix-turn-helix transcriptional regulator	#N/A	#N/A	0.618881	0.57818	0.300741	DMSO	-0.0333641	2.44811	0.100377	Amp	8.97661	3.56323	0.0235179	0.476064	Sig		-0.652245
K562_RS02890	K562_RS02890	CP053300	606236	608086	No_name	M24 family metallopeptidase	Belongs to the peptidase M24B family	0	0.112252	1.78631	0.61413	DMSO	-0.149519	2.05351	0.234249	Amp	6.87333	0.689805	0.528251	0.940833	Not_Sig		-0.261771
K562_RS02895	K562_RS02895	CP053300	608136	608576	No_name	flagellar protein FlgN	PFAM FlgN family protein	flgN	0.781398	0.356237	0.717566	DMSO	0.80639	0.196366	0.420177	Amp	2.91648	-0.0520568	0.960979	0.995162	Not_Sig		0.0249918
K562_RS02900	K562_RS02900	CP053300	608655	608981	No_name	flagellar biosynthesis anti-sigma factor FlgM	factor FlgM	flgM	0.733161	0.618986	0.196447	DMSO	0.324654	0.931802	0.3917	Amp	3.97573	1.61468	0.18168	0.763216	Not_Sig		-0.408508
K562_RS02905	K562_RS02905	CP053300	609099	610310	No_name	flagellar basal body P-ring formation protein FlgA	Flagella basal body p-ring formation protein	flgA	0.249471	1.50548	0.101533	DMSO	0.319365	1.60074	0.442666	Amp	19.0081	-0.266559	0.802986	0.975414	Not_Sig		0.0698945
K562_RS02910	K562_RS02910	CP053300	610515	611003	No_name	flagellar basal body rod protein FlgB	Structural component of flagellum, the bacterial motility apparatus. Part of the rod structure of flagellar basal body	flgB	0.750958	0.519269	0.750026	DMSO	1.04548	0.0263336	0.163214	Amp	21.1173	-0.664585	0.542671	0.942121	Not_Sig		0.294519
K562_RS02915	K562_RS02915	CP053300	611042	611467	No_name	flagellar basal body rod protein FlgC	Belongs to the flagella basal body rod proteins family	flgC	0.529573	0.502058	0.324764	DMSO	0.696632	0.124843	0.0117809	Amp	759.935	NA	NA	NA	Not_tested		0.167059
K562_RS02920	K562_RS02920	CP053300	611523	612269	No_name	flagellar hook assembly protein FlgD	Required for flagellar hook formation. May act as a scaffolding protein	flgD	0.675959	0.319509	0.410968	DMSO	0.562442	0.868154	0.625717	Amp	2.31814	0.262645	0.805797	0.975481	Not_Sig		-0.113518
K562_RS02925	K562_RS02925	CP053300	612297	613538	No_name	flagellar hook protein FlgE	flagellar	flgE	-0.656304	1.95149	0.818374	DMSO	-0.209768	1.77547	0.28338	Amp	8.33995	-0.893048	0.422304	0.915703	Not_Sig		0.446536
K562_RS02930	K562_RS02930	CP053300	613558	614316	No_name	flagellar basal-body rod protein FlgF	Flagellar basal-body rod protein FlgF	flgF	-0.672339	2.88217	0.257863	DMSO	-1.23922	2.35556	0.371679	Amp	2.07757	2.17049	0.095758	0.674479	Not_Sig		-0.566879
K562_RS02935	K562_RS02935	CP053300	614351	615139	No_name	flagellar basal-body rod protein FlgG	flagellar basal-body rod protein	flgG	-0.3298	1.35946	0.353432	DMSO	-0.0606778	1.63022	0.408304	Amp	1.33461	-0.86317	0.436726	0.918354	Not_Sig		0.269122
K562_RS02940	K562_RS02940	CP053300	615160	615849	No_name	flagellar basal body L-ring protein FlgH	Assembles around the rod to form the L-ring and probably protects the motor basal body from shearing forces during rotation	flgH	0.264998	1.3116	0.64594	DMSO	-0.0095163	0.576774	0.243238	Amp	7.05214	0.688872	0.528779	0.940833	Not_Sig		-0.274515
K562_RS02945	K562_RS02945	CP053300	615855	617039	No_name	flagellar basal body P-ring protein FlgI	Assembles around the rod to form the L-ring and probably protects the motor basal body from shearing forces during rotation	flgI	0.35898	1.14168	0.17722	DMSO	0.818898	0.66524	0.228977	Amp	1.66939	-2.75121	0.0513108	0.589555	Not_Sig		0.459918
K562_RS02950	K562_RS02950	CP053300	617040	618017	No_name	flagellar assembly peptidoglycan hydrolase FlgJ	Flagellar rod assembly protein muramidase FlgJ	flgJ	-0.057053	1.92577	0.140888	DMSO	-0.232615	1.75496	0.29298	Amp	4.32442	0.935368	0.402553	0.910295	Not_Sig		-0.175562
K562_RS02955	K562_RS02955	CP053300	618238	618993	No_name	flagellar brake protein	Acts as a flagellar brake, regulating swimming and swarming in a bis-(3'-5') cyclic diguanylic acid (c-di-GMP)- dependent manner. Binds 1 c-di-GMP dimer per subunit. Increasing levels of c-di-GMP lead to decreased motility	ycgR	-0.219324	1.21719	0.300146	DMSO	-0.175886	1.16812	0.26571	Amp	1.276	-0.187687	0.860258	0.981647	Not_Sig		0.0434377
K562_RS02960	K562_RS02960	CP053300	619175	621106	No_name	flagellar hook-associated protein FlgK	flagellar hook-associated protein	flgK	-0.42952	1.74736	0.255394	DMSO	-0.241087	1.29958	0.344488	Amp	1.8194	-0.761079	0.489006	0.930054	Not_Sig		0.188433
K562_RS02965	K562_RS02965	CP053300	621124	622359	No_name	flagellar hook-associated protein FlgL	Flagellar hook-associated protein 3	flgL	-0.488796	1.78173	0.216844	DMSO	-0.344945	2.07692	0.310134	Amp	2.04552	-0.658408	0.546244	0.943245	Not_Sig		0.143851
K562_RS02970	K562_RS02970	CP053300	622638	623945	No_name	pyrimidine permease	PFAM Xanthine uracil vitamin C permease	rutG	0.0824099	1.60271	0.367404	DMSO	0.0701026	1.65413	0.0407489	Amp	81.2936	NA	NA	NA	Not_tested		-0.0123073
K562_RS02975	K562_RS02975	CP053300	624009	624893	No_name	transcriptional regulator GcvA	transcriptional Regulator, LysR family	0	0.205986	1.17321	0.772246	DMSO	-0.238292	1.54045	0.477235	Amp	2.61847	0.847658	0.44437	0.918354	Not_Sig		-0.444278
K562_RS02980	K562_RS02980	CP053300	624990	625649	No_name	chromate transporter	Pfam Chromate transporter	0	-0.483945	1.73987	0.719555	DMSO	-0.711371	1.91566	0.543284	Amp	1.75418	0.436896	0.684737	0.963653	Not_Sig		-0.227426
K562_RS02985	K562_RS02985	CP053300	625646	626173	No_name	chromate transporter	chromate transporter	0	-1.51489	4.53642	0.616997	DMSO	-0.358475	0.0377423	0.240236	Amp	6.59617	-3.02511	0.0389673	0.54352	Sig		1.15642
K562_RS02990	K562_RS02990	CP053300	626220	626558	No_name	hypothetical protein	0	0	0.705442	4.53642	0.56392	DMSO	0.836277	0.0377423	0.484621	Amp	1.35404	-0.304771	0.77574	0.972764	Not_Sig		0.130834
K562_RS02995	K562_RS02995	CP053300	626846	627592	No_name	DUF1275 domain-containing protein	Protein of unknown function (DUF1275)	0	0.485576	1.55951	0.404729	DMSO	1.18899	0.17844	0.361594	Amp	1.25281	-2.24485	0.0881471	0.669601	Not_Sig		0.703412
K562_RS03000	K562_RS03000	CP053300	627937	629058	No_name	porin	PFAM porin Gram-negative type	0	0.0175477	2.00139	0.244968	DMSO	0.370234	1.60503	0.139884	Amp	3.0668	-2.16549	0.096295	0.674479	Not_Sig		0.352687
K562_RS03010	K562_RS03010	CP053300	629898	631253	No_name	glutathione-disulfide reductase	Belongs to the class-I pyridine nucleotide-disulfide oxidoreductase family	gor	0.07216	1.34299	0.12967	DMSO	-0.143273	1.47065	0.337739	Amp	6.78397	1.03142	0.360625	0.886667	Not_Sig		-0.215433
K562_RS03015	K562_RS03015	CP053300	631578	631727	No_name	hypothetical protein	#N/A	#N/A	0.178742	1.46635	0.466056	DMSO	0.205348	1.46073	0.994629	Amp	4.55456	-0.0419551	0.968545	0.997164	Not_Sig		0.0266065
K562_RS03020	K562_RS03020	CP053300	631786	632457	No_name	CsgG/HfaB family protein	#N/A	#N/A	0.75193	0.408471	0.326561	DMSO	0.521321	1.11122	0.43475	Amp	1.77235	0.734596	0.503326	0.934047	Not_Sig		-0.230609
K562_RS03025	K562_RS03025	CP053300	632515	632946	No_name	DUF4810 domain-containing protein	Domain of unknown function (DUF4810)	0	0.554971	0.312656	0.116049	DMSO	0.942117	0.275283	0.398568	Amp	11.7956	-1.61534	0.181541	0.763216	Not_Sig		0.387146
K562_RS03030	K562_RS03030	CP053300	632957	633631	No_name	DUF799 domain-containing protein	lipoprotein	0	-0.494922	1.62304	0.348577	DMSO	0.220222	0.944379	0.630222	Amp	3.26882	-1.7199	0.16057	0.740147	Not_Sig		0.715144
K562_RS03035	K562_RS03035	CP053300	633716	635079	No_name	IS3-like element ISBcen10 family transposase	#N/A	#N/A	1.54726	1.62304	1.15537	DMSO	1.54901	0.944379	0.324939	Amp	12.6426	-0.00252673	0.998105	0.999673	Not_Sig		0.00175085
K562_RS03040	K562_RS03040	CP053300	635175	636476	No_name	FAD-binding oxidoreductase	PFAM FAD dependent oxidoreductase	0	-1.58834	2.57385	0.395876	DMSO	-0.623598	1.61956	0.816493	Amp	4.25389	-1.8415	0.139356	0.714365	Not_Sig		0.964743
K562_RS03045	K562_RS03045	CP053300	636502	637806	No_name	FAD-binding oxidoreductase	PFAM FAD dependent oxidoreductase	0	-0.482019	1.38087	0.581673	DMSO	-0.998459	2.08171	1.04153	Amp	3.20615	0.749824	0.495054	0.930894	Not_Sig		-0.51644
K562_RS03050	K562_RS03050	CP053300	637904	639492	No_name	DUF3138 family protein	#N/A	#N/A	-1.0304	2.33878	0.0568196	DMSO	-1.01684	2.38067	0.617221	Amp	118.001	NA	NA	NA	Not_tested		0.0135651
K562_RS03055	K562_RS03055	CP053300	639608	640447	No_name	ABC transporter permease subunit	PFAM binding-protein-dependent transport systems inner membrane component	0	-0.722993	1.35886	0.541933	DMSO	-1.72499	1.04569	0.518762	Amp	1.09133	2.31337	0.0817289	0.658668	Not_Sig		-1.00199
K562_RS03060	K562_RS03060	CP053300	640444	641430	No_name	ABC transporter permease subunit	PFAM binding-protein-dependent transport systems inner membrane component	0	1.5499	0.365594	0.916599	DMSO	0.806656	0.138627	0.190552	Amp	23.1383	1.37508	0.2411	0.814573	Not_Sig		-0.743247
K562_RS03065	K562_RS03065	CP053300	641441	642595	No_name	polyamine ABC transporter ATP-binding protein	Part of the ABC transporter complex PotABCD involved in spermidine putrescine import. Responsible for energy coupling to the transport system	potG	0.409876	1.45367	0.748621	DMSO	0.554752	0.708796	0.306053	Amp	5.98315	-0.310266	0.771853	0.972764	Not_Sig		0.144876
K562_RS03070	K562_RS03070	CP053300	642784	643899	No_name	polyamine ABC transporter substrate-binding protein	Required for the activity of the bacterial periplasmic transport system of putrescine	0	0.968678	0.14644	0.359793	DMSO	0.372327	0.382414	0.244833	Amp	2.15956	2.37344	0.0765334	0.657828	Not_Sig		-0.596351
K562_RS03075	K562_RS03075	CP053300	643963	645405	No_name	aspartate aminotransferase family protein	Belongs to the class-III pyridoxal-phosphate-dependent aminotransferase family	0	-1.14221	1.5193	0.326136	DMSO	-1.87535	2.68	0.687786	Amp	4.44744	1.66821	0.170599	0.750196	Not_Sig		-0.733138
K562_RS03080	K562_RS03080	CP053300	645440	646777	No_name	glutamine synthetase	glutamine synthetase	0	1.5267	1.5193	0.697858	DMSO	1.18191	2.68	0.743755	Amp	1.13586	0.585558	0.589616	0.948571	Not_Sig		-0.344797
K562_RS03085	K562_RS03085	CP053300	646806	647591	No_name	gamma-glutamyl-gamma-aminobutyrate hydrolase family protein	PFAM peptidase C26	0	-1.62966	1.5193	2.54878	DMSO	-1.89613	2.68	2.84292	Amp	1.24412	0.12088	0.909615	0.987601	Not_Sig		-0.26647
K562_RS03090	K562_RS03090	CP053300	648513	649064	No_name	cupin domain-containing protein	Cupin 2, conserved barrel domain protein	0	1.31346	1.5193	2.65408	DMSO	-0.0597517	2.68	1.97153	Amp	1.81228	0.719396	0.511686	0.938329	Not_Sig		-1.37322
K562_RS03095	K562_RS03095	CP053300	649153	650643	No_name	aldehyde dehydrogenase	belongs to the aldehyde dehydrogenase family	puuC	1.06084	0.418236	0.602715	DMSO	0.760141	0.526844	0.350714	Amp	2.95337	0.74688	0.496646	0.930955	Not_Sig		-0.300696
K562_RS03105	K562_RS03105	CP053300	651233	651565	No_name	cupredoxin domain-containing protein	Cupredoxin-like domain	0	0.0747588	1.30075	0.466239	DMSO	-0.216835	1.26593	0.371959	Amp	1.57118	0.846793	0.4448	0.918487	Not_Sig		-0.291594
K562_RS03110	K562_RS03110	CP053300	651578	652414	No_name	FTR1 family protein	Iron permease	0	-0.519885	2.35576	0.231249	DMSO	-0.75826	1.92498	0.164052	Amp	1.98699	1.45621	0.21905	0.788611	Not_Sig		-0.238375
K562_RS03115	K562_RS03115	CP053300	652540	652758	No_name	hypothetical protein	0	0	0.889836	2.35576	0.198023	DMSO	1.26106	1.92498	0.140736	Amp	1.97978	-2.64664	0.0571823	0.603319	Not_Sig		0.371221
K562_RS03120	K562_RS03120	CP053300	652758	653228	No_name	hypothetical protein	0	0	1.56067	0.325524	0.488936	DMSO	0.809779	0.284619	0.201664	Amp	5.87824	2.45906	0.0697617	0.637243	Not_Sig		-0.750889
K562_RS03125	K562_RS03125	CP053300	653299	653619	No_name	DNA-binding transcriptional regulator	Helix-turn-helix	0	-0.996931	1.89462	0.476827	DMSO	-0.892604	2.78489	1.22186	Amp	6.56628	-0.137771	0.897078	0.984911	Not_Sig		0.104327
K562_RS03130	K562_RS03130	CP053300	653612	653977	No_name	type II toxin-antitoxin system RelE/ParE family toxin	RelE toxin of RelE / RelB toxin-antitoxin system	0	0.598619	0.324729	0.562818	DMSO	0.351813	0.273695	0.467445	Amp	1.44969	0.584294	0.590389	0.948571	Not_Sig		-0.246806
K562_RS03135	K562_RS03135	CP053300	654108	655925	No_name	glutamine--fructose-6-phosphate transaminase (isomerizing)	Catalyzes the first step in hexosamine metabolism, converting fructose-6P into glucosamine-6P using glutamine as a nitrogen source	glmS	-0.292187	2.08391	0.399442	DMSO	-0.0181182	2.19201	0.126612	Amp	9.95309	-1.13286	0.320573	0.865299	Not_Sig		0.274069
K562_RS03145	K562_RS03145	CP053300	657473	658453	No_name	tRNA 2-thiocytidine(32) synthetase TtcA	Catalyzes the ATP-dependent 2-thiolation of cytidine in position 32 of tRNA, to form 2-thiocytidine (s(2)C32). The sulfur atoms are provided by the cysteine cysteine desulfurase (IscS) system	ttcA	0.744043	0.796472	0.0808656	DMSO	0.653718	1.15076	0.299495	Amp	13.7168	0.504312	0.640554	0.960003	Not_Sig		-0.0903252
K562_RS03155	K562_RS03155	CP053300	658930	659673	No_name	SDR family oxidoreductase	Short-chain dehydrogenase reductase sdr	0	0.951474	0.157082	0.71794	DMSO	0.78762	0.173175	0.971121	Amp	1.82966	0.234997	0.825751	0.977153	Not_Sig		-0.163854
K562_RS03170	K562_RS03170	CP053300	661140	661361	No_name	hypothetical protein	0	0	-1.7286	0.26235	0.527558	DMSO	-3.42842	0.996575	0.535033	Amp	1.02854	3.91833	0.0172719	0.42739	Sig		-1.69982
K562_RS03175	K562_RS03175	CP053300	661471	662379	No_name	carbohydrate kinase	PFAM PfkB domain protein	0	1.69844	0.143327	0.58348	DMSO	1.29647	0.101154	0.613077	Amp	1.10402	0.82264	0.456925	0.922405	Not_Sig		-0.401976
K562_RS03180	K562_RS03180	CP053300	662376	663656	No_name	AGE family epimerase/isomerase	N-acylglucosamine 2-epimerase	0	-0.286823	1.76751	0.147661	DMSO	-0.2922	1.70648	0.198947	Amp	1.81529	0.0375916	0.971815	0.997164	Not_Sig		-0.00537721
K562_RS03185	K562_RS03185	CP053300	663653	664672	No_name	LacI family DNA-binding transcriptional regulator	periplasmic binding protein LacI transcriptional regulator	0	-0.639889	4.01831	0.403175	DMSO	0.799034	0.608507	0.751568	Amp	3.47496	-2.9222	0.0431484	0.556718	Sig		1.43892
K562_RS03190	K562_RS03190	CP053300	665055	666899	No_name	phosphodiesterase	GGDEF domain containing protein	0	0.149336	1.74634	0.227056	DMSO	-0.0955486	1.43659	0.257988	Amp	1.29103	1.23417	0.284692	0.844381	Not_Sig		-0.244885
K562_RS03195	K562_RS03195	CP053300	667106	668137	No_name	bile acid:sodium symporter	Bile acid sodium symporter	0	-0.846194	2.67106	0.659841	DMSO	-1.1168	3.38515	0.158644	Amp	17.2994	0.690639	0.527778	0.940833	Not_Sig		-0.270603
K562_RS03200	K562_RS03200	CP053300	668493	668975	No_name	hypothetical protein	0	0	1.36792	0.00536709	0.115978	DMSO	0.982611	0.00761695	0.116416	Amp	1.00757	4.06121	0.0153334	0.411167	Sig		-0.385307
K562_RS03205	K562_RS03205	CP053300	669321	670397	No_name	porin	PFAM porin Gram-negative type	0	0.280615	1.8641	0.233341	DMSO	0.213887	1.43902	0.154836	Amp	2.2711	0.412708	0.700983	0.963803	Not_Sig		-0.0667271
K562_RS03210	K562_RS03210	CP053300	670581	671543	No_name	LysR family transcriptional regulator	Transcriptional regulator, LysR family	0	1.40546	0.186565	0.394523	DMSO	0.55526	1.10519	0.294347	Amp	1.79649	2.99169	0.0402707	0.551378	Sig		-0.850203
K562_RS03215	K562_RS03215	CP053300	671659	672618	No_name	nitronate monooxygenase	2-Nitropropane dioxygenase	nppD	0.532818	0.930084	0.0488166	DMSO	0.225822	1.86067	0.175358	Amp	12.9038	2.92119	0.0431919	0.556718	Sig		-0.306997
K562_RS03220	K562_RS03220	CP053300	672858	673754	No_name	alpha/beta hydrolase	Alpha beta hydrolase	dehH	-0.372525	1.76884	0.543267	DMSO	-0.0274606	1.50689	0.381088	Amp	2.03225	-0.900643	0.418702	0.915703	Not_Sig		0.345064
K562_RS03225	K562_RS03225	CP053300	673816	674307	No_name	Lrp/AsnC family transcriptional regulator	PFAM regulatory protein AsnC Lrp family	0	0.26795	0.64559	0.382563	DMSO	0.660304	0.165481	0.403324	Amp	1.11148	-1.22248	0.288631	0.844936	Not_Sig		0.392354
K562_RS03230	K562_RS03230	CP053300	674420	675322	No_name	DMT family transporter	EamA-like transporter family	0	0.0362269	1.54173	0.638938	DMSO	-0.100671	1.68654	0.429447	Amp	2.2136	0.308002	0.773453	0.972764	Not_Sig		-0.136898
K562_RS03235	K562_RS03235	CP053300	675575	675781	No_name	DUF1289 domain-containing protein	Protein of unknown function (DUF1289)	0	-0.0550599	0.768092	0.459962	DMSO	0.775088	0.506268	0.783688	Amp	2.90297	-1.58233	0.188739	0.763838	Not_Sig		0.830147
K562_RS03240	K562_RS03240	CP053300	675778	676284	No_name	YbaK/EbsC family protein	Aminoacyl-tRNA editing domain	0	-0.258835	1.08164	0.905972	DMSO	-0.50953	2.36275	1.40739	Amp	2.41324	0.259422	0.808114	0.975516	Not_Sig		-0.250695
K562_RS03245	K562_RS03245	CP053300	676311	677243	No_name	hydroxymethylglutaryl-CoA lyase	Hydroxymethylglutaryl-CoA lyase	0	-1.02462	2.36119	0.0871007	DMSO	-1.16284	2.67241	0.265954	Amp	9.32331	0.855464	0.44051	0.918354	Not_Sig		-0.13822
K562_RS03250	K562_RS03250	CP053300	677276	678217	No_name	glyoxylate/hydroxypyruvate reductase A	d-isomer specific 2-hydroxyacid dehydrogenase, nad-binding	0	0.114343	1.63893	0.204082	DMSO	-0.138309	1.73005	0.309173	Amp	2.29506	1.18127	0.302932	0.852303	Not_Sig		-0.252653
K562_RS03255	K562_RS03255	CP053300	678564	679187	No_name	alpha/beta hydrolase	Alpha beta hydrolase	0	-1.54537	6.21809	0.5167	DMSO	0.720281	0.914063	0.982137	Amp	3.61299	-3.53609	0.024098	0.478241	Sig		2.26565
K562_RS03265	K562_RS03265	CP053300	679713	680042	No_name	hypothetical protein	#N/A	#N/A	0.562381	1.65661	2.3835	DMSO	1.16614	0.409587	0.862922	Amp	7.62935	-0.412541	0.701096	0.963803	Not_Sig		0.603763
K562_RS03270	K562_RS03270	CP053300	680271	681026	No_name	2Fe-2S iron-sulfur cluster binding domain-containing protein	2Fe-2S -binding domain protein	0	0.814452	0.93323	0.701534	DMSO	0.549448	1.70102	0.697743	Amp	1.0109	0.463898	0.666842	0.96079	Not_Sig		-0.265004
K562_RS03275	K562_RS03275	CP053300	681045	682046	No_name	xanthine dehydrogenase family protein subunit M	PFAM molybdopterin dehydrogenase, FAD-binding	0	1.09217	0.147524	0.254929	DMSO	1.70549	0.772343	1.18806	Amp	21.7189	-0.87424	0.431337	0.915703	Not_Sig		0.613314
K562_RS03280	K562_RS03280	CP053300	682043	684268	No_name	xanthine dehydrogenase family protein molybdopterin-binding subunit	Aldehyde oxidase and xanthine dehydrogenase, molybdopterin binding	0	0.300958	0.943333	0.352522	DMSO	0.373474	1.43714	0.286944	Amp	1.50931	-0.276326	0.795987	0.974972	Not_Sig		0.0725163
K562_RS03285	K562_RS03285	CP053300	684278	685198	No_name	LysR family transcriptional regulator	LysR substrate binding domain	0	0.189444	0.527804	0.265838	DMSO	0.539917	1.05135	1.37241	Amp	26.652	-0.434245	0.686508	0.963653	Not_Sig		0.350473
K562_RS03290	K562_RS03290	CP053300	685311	685949	No_name	glutathione S-transferase	Glutathione S-transferase, N-terminal domain	0	1.55673	0.527804	0.236067	DMSO	1.54659	1.05135	0.89291	Amp	14.3069	0.0190197	0.985736	0.997585	Not_Sig		-0.0101419
K562_RS03295	K562_RS03295	CP053300	686006	687277	No_name	MFS transporter	PFAM major facilitator superfamily MFS_1	0	0.656717	0.514316	0.603094	DMSO	-0.133365	1.62858	0.223145	Amp	7.30456	2.12807	0.100425	0.680788	Not_Sig		-0.790083
K562_RS03300	K562_RS03300	CP053300	687384	688438	No_name	LysR family transcriptional regulator	#N/A	#N/A	0.592763	0.886031	0.901658	DMSO	1.0943	0.256592	0.322197	Amp	7.83143	-0.907244	0.415591	0.915703	Not_Sig		0.501534
K562_RS03305	K562_RS03305	CP053300	688553	688762	No_name	hypothetical protein	#N/A	#N/A	-0.680512	1.81727	0.297456	DMSO	-0.0673628	1.32562	0.610417	Amp	4.21121	-1.56399	0.192864	0.766713	Not_Sig		0.613149
K562_RS03310	K562_RS03310	CP053300	688762	689142	No_name	type II toxin-antitoxin system VapC family toxin	#N/A	#N/A	-0.665924	2.40863	0.356091	DMSO	-1.1007	2.32384	0.158722	Amp	5.03325	1.93158	0.125586	0.701791	Not_Sig		-0.434776
K562_RS03315	K562_RS03315	CP053300	689199	690092	No_name	4-hydroxy-tetrahydrodipicolinate synthase	Catalyzes the condensation of (S)-aspartate-beta- semialdehyde (S)-ASA and pyruvate to 4-hydroxy- tetrahydrodipicolinate (HTPA)	0	0.366964	1.05908	0.441438	DMSO	0.713965	0.643266	0.121609	Amp	13.1768	-1.31261	0.25956	0.829138	Not_Sig		0.347001
K562_RS03320	K562_RS03320	CP053300	690232	690523	No_name	hypothetical protein	#N/A	#N/A	0.704484	1.05908	0.187988	DMSO	1.0093	0.643266	0.476171	Amp	6.41601	-1.03129	0.360675	0.886667	Not_Sig		0.304816
K562_RS03325	K562_RS03325	CP053300	690544	691563	No_name	sulfate ABC transporter substrate-binding protein	TIGRFAM sulfate ABC transporter, periplasmic sulfate-binding protein	sbp	-0.136363	1.24803	0.619981	DMSO	-0.450153	2.50214	0.576384	Amp	1.157	0.642042	0.555792	0.944915	Not_Sig		-0.313791
K562_RS03330	K562_RS03330	CP053300	691729	692697	No_name	potassium channel protein	K channel, inward rectifier, conserved region 2 domain protein	0	0.612516	1.04633	0.245964	DMSO	0.0024155	1.57744	0.230733	Amp	1.13638	3.13338	0.0350707	0.523355	Sig		-0.610101
K562_RS03335	K562_RS03335	CP053300	692730	693344	No_name	glutathione S-transferase	Glutathione S-transferase	0	-1.19832	2.25695	0.240909	DMSO	-1.23546	2.66152	0.341156	Amp	2.00538	0.154016	0.885056	0.983136	Not_Sig		-0.0371371
K562_RS03345	K562_RS03345	CP053300	695988	699560	No_name	indolepyruvate ferredoxin oxidoreductase family protein	oxidoreductase	0	0.592156	1.14838	0.168159	DMSO	0.358564	1.14507	0.268627	Amp	2.55187	1.27664	0.270807	0.83512	Not_Sig		-0.233592
K562_RS03350	K562_RS03350	CP053300	699653	701320	No_name	Na+/H+ antiporter	Na H antiporter	0	-0.864471	2.28359	0.19925	DMSO	-1.00336	2.12551	0.0640661	Amp	9.6725	1.14943	0.314431	0.863424	Not_Sig		-0.138894
K562_RS03355	K562_RS03355	CP053300	701629	702915	No_name	EAL domain-containing protein	PFAM EAL domain protein	0	1.06194	0.0485588	0.561116	DMSO	0.855414	0.0103445	0.0335564	Amp	279.611	NA	NA	NA	Not_tested		-0.206528
K562_RS03360	K562_RS03360	CP053300	703072	703458	No_name	hypothetical protein	0	0	0.802267	0.360375	0.381747	DMSO	0.708857	0.523143	0.195409	Amp	3.8165	0.377262	0.725141	0.965921	Not_Sig		-0.0934097
K562_RS03365	K562_RS03365	CP053300	703455	703859	No_name	hypothetical protein	#N/A	#N/A	1.6522	0.360375	0.799903	DMSO	1.52386	0.523143	0.393569	Amp	4.13079	0.249344	0.815375	0.976845	Not_Sig		-0.128337
K562_RS03370	K562_RS03370	CP053300	703969	704694	No_name	copper homeostasis protein CutC	Participates in the control of copper homeostasis	cutC	0.179576	0.120868	0.579529	DMSO	-0.49062	0.883587	1.39608	Amp	5.80327	0.767942	0.485346	0.930054	Not_Sig		-0.670196
K562_RS03375	K562_RS03375	CP053300	704756	705844	No_name	suppressor of fused domain protein	Suppressor of fused protein (SUFU)	0	-0.374908	1.70214	0.309747	DMSO	-1.09618	2.10207	0.500349	Amp	2.60935	2.12295	0.101006	0.680788	Not_Sig		-0.721276
K562_RS03380	K562_RS03380	CP053300	705869	707224	No_name	allantoin permease	Allantoin permease	0	0.0901803	1.98035	0.284577	DMSO	-0.302561	2.30911	0.802918	Amp	7.96056	0.798547	0.46928	0.92626	Not_Sig		-0.392741
K562_RS03385	K562_RS03385	CP053300	707446	708441	No_name	biotin-dependent carboxyltransferase	Carboxyltransferase domain, subdomain A and B	0	-0.429402	1.88406	0.205874	DMSO	-0.681545	1.89841	0.653364	Amp	10.0718	0.637525	0.558447	0.945473	Not_Sig		-0.252144
K562_RS03390	K562_RS03390	CP053300	708431	709306	No_name	allophanate hydrolase subunit 1	Carboxyltransferase domain, subdomain C and D	0	0.441718	1.52531	0.0763419	DMSO	0.771805	1.02419	0.153292	Amp	4.03193	-3.33855	0.0288747	0.492199	Sig		0.330087
K562_RS03395	K562_RS03395	CP053300	709303	710760	No_name	acetyl-CoA carboxylase biotin carboxylase subunit	acetyl-CoA carboxylase, biotin carboxylase	0	-0.711623	2.25629	0.437092	DMSO	0.508772	0.316503	0.286733	Amp	2.32376	-4.0436	0.0155576	0.411167	Sig		1.2204
K562_RS03400	K562_RS03400	CP053300	710765	711007	No_name	biotin carboxyl carrier domain-containing protein	first, biotin carboxylase catalyzes the carboxylation of the carrier protein and then the transcarboxylase transfers the carboxyl group to form malonyl-CoA	0	1.53384	2.25629	3.84427	DMSO	0.613176	0.316503	5.01134	Amp	1.69934	0.252476	0.813116	0.9765	Not_Sig		-0.920665
K562_RS03405	K562_RS03405	CP053300	711030	711812	No_name	5-oxoprolinase subunit PxpA	Belongs to the UPF0271 (lamB) family	0	-1.58613	2.14817	0.890095	DMSO	-1.76607	2.5591	1.53574	Amp	2.97688	0.175578	0.869155	0.981699	Not_Sig		-0.179936
K562_RS03410	K562_RS03410	CP053300	712072	712989	No_name	LysR family transcriptional regulator	Transcriptional regulator	0	-0.0573632	2.079	0.565109	DMSO	0.530012	1.65707	0.632482	Amp	1.25266	-1.19949	0.296529	0.846189	Not_Sig		0.587375
K562_RS03415	K562_RS03415	CP053300	713069	714088	No_name	biotin synthase BioB	Catalyzes the conversion of dethiobiotin (DTB) to biotin by the insertion of a sulfur atom into dethiobiotin via a radical- based mechanism	bioB	-1.46268	1.28939	0.5944	DMSO	-1.1582	1.32429	0.32369	Amp	3.37209	-0.779185	0.479396	0.930054	Not_Sig		0.304477
K562_RS03420	K562_RS03420	CP053300	714130	714849	No_name	dethiobiotin synthase	Catalyzes a mechanistically unusual reaction, the ATP- dependent insertion of CO2 between the N7 and N8 nitrogen atoms of 7,8-diaminopelargonic acid (DAPA) to form an ureido ring	bioD	-0.516409	0.482007	0.962904	DMSO	-0.0267427	0.0191253	0.139801	Amp	47.4404	NA	NA	NA	Not_tested		0.489667
K562_RS03425	K562_RS03425	CP053300	714846	716030	No_name	8-amino-7-oxononanoate synthase	Catalyzes the decarboxylative condensation of pimeloyl- acyl-carrier protein and L-alanine to produce 8-amino-7- oxononanoate (AON), acyl-carrier protein , and carbon dioxide	bioF	-0.71132	1.86589	1.4779	DMSO	-0.413868	1.6189	0.893652	Amp	2.73496	-0.298309	0.780321	0.972764	Not_Sig		0.297452
K562_RS03430	K562_RS03430	CP053300	716027	717373	No_name	adenosylmethionine--8-amino-7-oxononanoate transaminase	#N/A	#N/A	0.0584719	0.178184	0.369009	DMSO	-0.0106916	0.214809	0.475369	Amp	1.65954	0.199066	0.85192	0.981647	Not_Sig		-0.0691635
K562_RS03435	K562_RS03435	CP053300	717853	719124	No_name	prolyl oligopeptidase family serine peptidase	X-Pro dipeptidyl-peptidase (S15 family)	0	0.472738	1.11694	0.527576	DMSO	0.451429	1.37259	0.312541	Amp	2.84942	0.0601888	0.954892	0.995107	Not_Sig		-0.0213088
K562_RS03440	K562_RS03440	CP053300	719231	719665	No_name	YchJ family protein	Belongs to the UPF0225 family	0	-0.527335	2.19616	0.777733	DMSO	0.181615	0.783966	0.546469	Amp	2.02549	-1.29185	0.265996	0.832015	Not_Sig		0.70895
K562_RS03445	K562_RS03445	CP053300	719704	720381	No_name	SDR family oxidoreductase	short-chain dehydrogenase	0	-0.627725	2.32552	0.642608	DMSO	0.163423	0.789496	0.646104	Amp	1.01091	-1.50375	0.20708	0.777461	Not_Sig		0.791148
K562_RS03450	K562_RS03450	CP053300	720493	721260	No_name	carbonate dehydratase	Reversible hydration of carbon dioxide	can	-5.391	0.291325	0.243463	DMSO	-2.94197	0.470845	1.0874	Amp	19.9486	-3.80665	0.0189947	0.445231	Sig		2.44902
K562_RS03455	K562_RS03455	CP053300	721317	723134	No_name	bifunctional isocitrate dehydrogenase kinase/phosphatase	Bifunctional enzyme which can phosphorylate or dephosphorylate isocitrate dehydrogenase (IDH) on a specific serine residue. This is a regulatory mechanism which enables bacteria to bypass the Krebs cycle via the glyoxylate shunt in response to the source of carbon. When bacteria are grown on glucose, IDH is fully active and unphosphorylated, but when grown on acetate or ethanol, the activity of I…	aceK	-0.499046	1.8974	0.289636	DMSO	-0.459437	1.85749	0.442475	Amp	2.33384	-0.129725	0.903046	0.984911	Not_Sig		0.0396086
K562_RS03460	K562_RS03460	CP053300	723439	724518	No_name	MBL fold metallo-hydrolase	PFAM beta-lactamase domain protein	0	0.42969	2.69052	0.323057	DMSO	0.0278831	0.750909	0.698715	Amp	4.67782	0.904083	0.417078	0.915703	Not_Sig		-0.401807
K562_RS03465	K562_RS03465	CP053300	724538	726181	No_name	ABC-F family ATP-binding cassette domain-containing protein	abc transporter	0	1.20873	0.573317	0.629786	DMSO	0.545565	1.02629	0.397967	Amp	2.50434	1.54181	0.197979	0.768684	Not_Sig		-0.663163
K562_RS03470	K562_RS03470	CP053300	726374	727969	No_name	ABC transporter substrate-binding protein	PFAM extracellular solute-binding protein, family 5	0	-0.494205	1.86108	0.431714	DMSO	-0.603104	1.8227	0.399365	Amp	1.16856	0.320721	0.764479	0.972764	Not_Sig		-0.108899
K562_RS03475	K562_RS03475	CP053300	728253	729026	No_name	SDR family oxidoreductase	Belongs to the short-chain dehydrogenases reductases (SDR) family	0	0.0154632	2.41563	0.320413	DMSO	0.521862	0.507094	0.47374	Amp	2.18605	-1.53362	0.199903	0.772697	Not_Sig		0.506399
K562_RS03480	K562_RS03480	CP053300	729046	729684	No_name	thiol:disulfide interchange protein DsbA/DsbL	Thiol disulfide interchange protein	dsbA	0.954815	0.315334	0.266137	DMSO	1.25076	0.597527	0.622423	Amp	5.46965	-0.757235	0.491066	0.930894	Not_Sig		0.295949
K562_RS03485	K562_RS03485	CP053300	729755	730645	No_name	SPOR domain-containing protein	PFAM Sporulation domain protein	ftsN	-0.232694	2.07582	0.266601	DMSO	-0.226347	1.3333	0.133168	Amp	4.00796	-0.0368887	0.972341	0.997472	Not_Sig		0.00634694
K562_RS03495	K562_RS03495	CP053300	732735	733058	No_name	DUF1840 domain-containing protein	Domain of unknown function (DUF1840)	0	0.0118538	2.07582	0.742657	DMSO	-3.1153	1.3333	2.27248	Amp	9.3632	2.26555	0.0861501	0.669601	Not_Sig		-3.12715
K562_RS03500	K562_RS03500	CP053300	733171	735888	No_name	methionine synthase	Vitamin B12 dependent methionine synthase activation region	metH	0.375995	1.30019	0.220549	DMSO	0.204051	1.20321	0.257796	Amp	1.36629	0.877828	0.429602	0.915703	Not_Sig		-0.171944
K562_RS03505	K562_RS03505	CP053300	735931	736998	No_name	homocysteine S-methyltransferase family protein	Pfam Homocysteine S-methyltransferase	metHa	0.797067	0.878738	0.493299	DMSO	1.16763	0.297272	0.684145	Amp	1.92343	-0.760975	0.489062	0.930054	Not_Sig		0.370566
K562_RS03510	K562_RS03510	CP053300	737201	737458	No_name	DUF3567 domain-containing protein	Protein of unknown function (DUF3567)	0	-0.215061	1.72889	0.713616	DMSO	0.00965427	1.14057	0.564124	Amp	1.60022	-0.42787	0.690776	0.963653	Not_Sig		0.224715
K562_RS03515	K562_RS03515	CP053300	737717	738967	No_name	DUF3108 domain-containing protein	Protein of unknown function (DUF3108)	0	0.747676	0.775024	0.171323	DMSO	1.13657	0.316901	0.307869	Amp	3.22923	-1.9118	0.128479	0.703306	Not_Sig		0.388893
K562_RS03520	K562_RS03520	CP053300	739082	739948	No_name	IclR family transcriptional regulator	Bacterial transcriptional regulator	0	0.159318	1.72335	0.224996	DMSO	0.61579	1.57368	0.362993	Amp	2.60285	-1.85131	0.137781	0.71227	Not_Sig		0.456472
K562_RS03525	K562_RS03525	CP053300	740077	741069	No_name	fumarylacetoacetate hydrolase family protein	fumarylacetoacetate (FAA) hydrolase	0	0.500972	0.740547	0.289361	DMSO	0.0239846	1.89149	0.430125	Amp	2.20958	1.59369	0.186229	0.763838	Not_Sig		-0.476987
K562_RS03530	K562_RS03530	CP053300	741202	742029	No_name	enoyl-CoA hydratase/isomerase family protein	Belongs to the enoyl-CoA hydratase isomerase family	echA15	0.465324	0.916101	0.194535	DMSO	0.17242	2.55174	0.139985	Amp	1.93121	2.1168	0.101708	0.68181	Not_Sig		-0.292904
K562_RS03540	K562_RS03540	CP053300	742879	744105	No_name	patatin-like phospholipase family protein	Patatin-like phospholipase	0	0.741168	1.22984	0.191037	DMSO	0.773195	0.61747	0.264215	Amp	1.91283	-0.170138	0.873161	0.981699	Not_Sig		0.0320269
K562_RS03550	K562_RS03550	CP053300	745611	746096	No_name	D-glycero-beta-D-manno-heptose 1-phosphate adenylyltransferase	Catalyzes the ADP transfer from ATP to D-glycero-beta-D- manno-heptose 1-phosphate, yielding ADP-D-glycero-beta-D-manno- heptose	hldC	-2.89807	1.22984	2.54468	DMSO	-3.4704	0.61747	1.97001	Amp	1.66851	0.308038	0.773428	0.972764	Not_Sig		-0.572329
K562_RS03570	K562_RS03570	CP053300	748551	749396	No_name	sel1 repeat family protein	PFAM Sel1 domain protein repeat-containing protein	0	0.234717	1.14658	0.487816	DMSO	1.24135	0.76344	0.535095	Amp	1.20323	-2.40793	0.0737201	0.650718	Not_Sig		1.00663
K562_RS03575	K562_RS03575	CP053300	749405	751474	No_name	bifunctional 2'	Belongs to the 5'-nucleotidase family	cpdB	0.394125	1.46327	0.160136	DMSO	0.308117	1.76359	0.285303	Amp	3.1742	0.455327	0.672494	0.963452	Not_Sig		-0.0860079
K562_RS03580	K562_RS03580	CP053300	751845	752969	No_name	ABC transporter permease	ABC transporter permease	0	0.367891	1.62627	0.167764	DMSO	0.65441	1.39936	0.269688	Amp	2.58421	-1.5625	0.193204	0.766713	Not_Sig		0.286519
K562_RS03585	K562_RS03585	CP053300	752966	753880	No_name	ABC transporter ATP-binding protein	abc transporter	0	-0.584369	1.57809	0.551842	DMSO	-0.234691	1.57461	0.180134	Amp	9.3851	-1.04334	0.355693	0.886667	Not_Sig		0.349678
K562_RS03590	K562_RS03590	CP053300	753898	754827	No_name	MCE family protein	PFAM Mammalian cell entry related domain protein	0	0.528014	0.446102	0.207783	DMSO	0.0939468	1.36931	0.348184	Amp	2.80802	1.85421	0.137318	0.711118	Not_Sig		-0.434068
K562_RS03595	K562_RS03595	CP053300	754911	755534	No_name	membrane integrity-associated transporter subunit PqiC	ABC-type transport auxiliary lipoprotein component	0	0.709663	0.391835	0.398188	DMSO	0.832744	0.562937	0.0729963	Amp	29.7561	-0.526607	0.626317	0.957139	Not_Sig		0.123081
K562_RS03600	K562_RS03600	CP053300	755554	756705	No_name	VanZ family protein	PFAM VanZ family protein	0	-0.868158	2.26448	0.326438	DMSO	-0.773824	2.21874	0.276716	Amp	1.39165	-0.381808	0.72202	0.965921	Not_Sig		0.094334
K562_RS03605	K562_RS03605	CP053300	756860	757177	No_name	ferredoxin	Ferredoxin	0	-0.246611	1.72828	0.41155	DMSO	1.28805	0.175965	0.192918	Amp	4.55091	-5.84812	0.00426422	0.261812	Sig		1.53466
K562_RS03610	K562_RS03610	CP053300	757191	757835	No_name	alpha/beta hydrolase	Alpha beta	0	0.29182	1.35855	0.195309	DMSO	0.336021	1.16246	0.556406	Amp	8.11594	-0.129828	0.902969	0.984911	Not_Sig		0.044201
K562_RS03615	K562_RS03615	CP053300	758344	759654	No_name	D-alanyl-D-alanine carboxypeptidase	Belongs to the peptidase S11 family	dacC	0.315057	1.46641	0.179598	DMSO	-0.207559	1.59041	0.141464	Amp	1.61181	3.95938	0.0166864	0.417234	Sig		-0.522616
K562_RS03620	K562_RS03620	CP053300	759703	760629	No_name	D-amino acid aminotransferase	PFAM aminotransferase, class IV	dat	-0.0270708	1.51584	0.311392	DMSO	-0.534732	1.75885	0.641874	Amp	4.24898	1.23251	0.285249	0.844381	Not_Sig		-0.507662
K562_RS03625	K562_RS03625	CP053300	760629	760937	No_name	YbeD family protein	Belongs to the UPF0250 family	0	-1.47738	0.758305	0.248726	DMSO	-1.77587	0.962428	0.821794	Amp	10.9165	0.602145	0.579545	0.948571	Not_Sig		-0.298494
K562_RS03630	K562_RS03630	CP053300	760961	761950	No_name	transcriptional regulator GcvA	Transcriptional regulator	0	0.29393	1.00331	0.186589	DMSO	0.51551	0.740027	0.208361	Amp	1.24699	-1.37216	0.241932	0.814573	Not_Sig		0.22158
K562_RS03635	K562_RS03635	CP053300	762053	762379	No_name	DUF2917 domain-containing protein	Protein of unknown function (DUF2917)	0	-0.0783702	2.83555	0.548684	DMSO	0.829844	0.484751	0.615815	Amp	1.25967	-1.90724	0.129157	0.703306	Not_Sig		0.908214
K562_RS03645	K562_RS03645	CP053300	763213	764205	No_name	lipoyl synthase	Catalyzes the radical-mediated insertion of two sulfur atoms into the C-6 and C-8 positions of the octanoyl moiety bound to the lipoyl domains of lipoate-dependent enzymes, thereby converting the octanoylated domains into lipoylated derivatives	lipA	-3.28252	2.83555	1.08118	DMSO	-2.43668	0.484751	1.82294	Amp	2.8428	-0.691241	0.527438	0.940833	Not_Sig		0.845847
K562_RS03650	K562_RS03650	CP053300	764466	765482	No_name	taurine ABC transporter substrate-binding protein	taurine ABC transporter	tauA	0.280159	1.31855	1.02606	DMSO	-0.384199	1.63692	0.633072	Amp	2.62686	0.95443	0.393914	0.905265	Not_Sig		-0.664357
K562_RS03655	K562_RS03655	CP053300	765521	766318	No_name	ABC transporter ATP-binding protein	Part of the ABC transporter complex TauABC involved in taurine import. Responsible for energy coupling to the transport system	tauB	-3.6507	0.365167	0.70613	DMSO	-1.45667	1.52755	0.533715	Amp	1.75045	-4.29331	0.0127128	0.396983	Sig		2.19403
K562_RS03660	K562_RS03660	CP053300	766318	767280	No_name	ABC transporter permease subunit	binding-protein-dependent transport systems inner membrane component	tauC	0.825168	0.348958	0.624122	DMSO	-0.256593	2.19028	1.32461	Amp	4.50437	1.27958	0.269871	0.83512	Not_Sig		-1.08176
K562_RS03665	K562_RS03665	CP053300	767337	769211	No_name	gamma-glutamyltransferase	gamma-glutamyltransferase	0	0.341844	0.914717	0.31861	DMSO	0.201602	1.2565	0.41535	Amp	1.69945	0.464025	0.666758	0.96079	Not_Sig		-0.140242
K562_RS03670	K562_RS03670	CP053300	769295	770257	No_name	LysR family transcriptional regulator	Transcriptional regulator, LysR family	0	0.0859469	1.72092	0.0378854	DMSO	-0.103398	1.8202	0.721694	Amp	362.879	NA	NA	NA	Not_tested		-0.189345
K562_RS03675	K562_RS03675	CP053300	770417	772540	No_name	enoyl-CoA hydratase/isomerase family protein	3-hydroxyacyl-coa dehydrogenase	0	0.450163	1.16275	0.530806	DMSO	0.577675	0.89087	0.375475	Amp	1.99852	-0.339684	0.751181	0.968706	Not_Sig		0.127511
K562_RS03680	K562_RS03680	CP053300	772570	773766	No_name	acyl-CoA dehydrogenase family protein	acyl-CoA dehydrogenase	0	-0.5371	2.39907	0.236845	DMSO	-0.643218	2.13318	0.0777066	Amp	9.28995	0.73737	0.501812	0.932226	Not_Sig		-0.106118
K562_RS03685	K562_RS03685	CP053300	773781	774923	No_name	acyl-CoA dehydrogenase family protein	acyl-CoA dehydrogenase	0	-0.576197	2.73332	0.351183	DMSO	-0.411072	1.95349	0.530616	Amp	2.28293	-0.449479	0.676366	0.963653	Not_Sig		0.165125
K562_RS03690	K562_RS03690	CP053300	774953	776158	No_name	CoA transferase	PFAM L-carnitine dehydratase bile acid-inducible protein F	0	0.566508	1.05557	0.751512	DMSO	-0.415941	1.63775	0.381469	Amp	3.88109	2.01908	0.113617	0.689076	Not_Sig		-0.982448
K562_RS03695	K562_RS03695	CP053300	776254	776559	No_name	DUF485 domain-containing protein	Protein of unknown function, DUF485	0	-0.519725	1.50494	0.321476	DMSO	-0.165981	0.998283	0.40022	Amp	1.54989	-1.19355	0.298602	0.848536	Not_Sig		0.353744
K562_RS03700	K562_RS03700	CP053300	776571	778256	No_name	cation acetate symporter	Belongs to the sodium solute symporter (SSF) (TC 2.A.21) family	actP	0.326812	2.47194	0.377758	DMSO	0.454805	1.47134	0.739401	Amp	3.83119	-0.266997	0.802672	0.975414	Not_Sig		0.127993
K562_RS03705	K562_RS03705	CP053300	778613	779902	No_name	dicarboxylate/amino acid:cation symporter	Responsible for the transport of dicarboxylates such as succinate, fumarate, and malate	dctA	-0.116957	1.71144	0.256004	DMSO	-0.0226239	1.58506	0.597207	Amp	5.44197	-0.251459	0.81385	0.976686	Not_Sig		0.0943327
K562_RS03710	K562_RS03710	CP053300	779907	781916	No_name	sensor histidine kinase	PFAM ATP-binding region, ATPase domain protein	dctB	0.861012	1.1232	0.412366	DMSO	0.38	1.0094	0.109009	Amp	14.3102	1.95329	0.122494	0.700156	Not_Sig		-0.481012
K562_RS03715	K562_RS03715	CP053300	782004	783356	No_name	sigma-54-dependent Fis family transcriptional regulator	response regulator	dctD	0.466756	0.828008	0.296965	DMSO	0.364001	1.04627	0.212616	Amp	1.95083	0.487299	0.651547	0.960654	Not_Sig		-0.102755
K562_RS03720	K562_RS03720	CP053300	783456	783992	No_name	TlpA family protein disulfide reductase	Redoxin domain protein	0	-0.810906	2.42738	0.913202	DMSO	-0.976963	2.75499	0.821652	Amp	1.23526	0.234135	0.826376	0.977153	Not_Sig		-0.166057
K562_RS03725	K562_RS03725	CP053300	784150	784722	No_name	hypothetical protein	0	0	0.0875836	1.90471	0.314417	DMSO	0.300855	1.36555	0.367229	Amp	1.36415	-0.764098	0.487394	0.930054	Not_Sig		0.213271
K562_RS03730	K562_RS03730	CP053300	785055	786659	No_name	YifB family Mg chelatase-like AAA ATPase	magnesium chelatase	0	-0.314245	2.32849	0.168455	DMSO	-0.445178	2.64285	0.555517	Amp	10.8749	0.39067	0.715956	0.965921	Not_Sig		-0.130933
K562_RS03735	K562_RS03735	CP053300	786924	787175	No_name	accessory factor UbiK family protein	Membrane fusogenic activity	0	0.901549	1.84279	0.487834	DMSO	1.06868	0.787714	0.334319	Amp	2.12922	-0.489487	0.650127	0.960654	Not_Sig		0.167132
K562_RS03740	K562_RS03740	CP053300	787531	787869	No_name	P-II family nitrogen regulator	Belongs to the P(II) protein family	glnK	0.429638	0.980315	0.439228	DMSO	-0.46775	2.73283	1.18659	Amp	7.29824	1.22845	0.286613	0.844936	Not_Sig		-0.897388
K562_RS03745	K562_RS03745	CP053300	787907	789418	No_name	ammonium transporter	Ammonium transporter	amt	0.324765	1.61735	0.203051	DMSO	-0.0358677	2.08445	0.670814	Amp	10.9142	0.891224	0.423173	0.915703	Not_Sig		-0.360633
K562_RS03750	K562_RS03750	CP053300	789662	790951	No_name	glutamate--cysteine ligase	glutamate--cysteine ligase	gshA	-0.297948	1.47562	0.11513	DMSO	0.0949239	1.66485	0.328401	Amp	8.13642	-1.9554	0.122197	0.700156	Not_Sig		0.392872
K562_RS03755	K562_RS03755	CP053300	790977	791933	No_name	glutathione synthase	Belongs to the prokaryotic GSH synthase family	gshB	-0.273995	2.04869	0.0790565	DMSO	-0.494437	1.8119	0.251184	Amp	10.0951	1.44995	0.220676	0.790752	Not_Sig		-0.220442
K562_RS03760	K562_RS03760	CP053300	792171	792641	No_name	PTS fructose transporter subunit IIA	pts system fructose subfamily IIa component	0	-1.09621	2.04869	1.97531	DMSO	-3.0447	1.8119	2.56694	Amp	1.68873	1.04196	0.356264	0.886667	Not_Sig		-1.94849
K562_RS03765	K562_RS03765	CP053300	792715	792984	No_name	HPr family phosphocarrier protein	phosphocarrier, HPr family	ptsH	0.510179	0.10453	0.101806	DMSO	1.31206	0.145943	0.0509955	Amp	3.98555	-12.1979	0.000259297	0.0945648	Sig		0.801885
K562_RS03770	K562_RS03770	CP053300	793186	794958	No_name	phosphoenolpyruvate--protein phosphotransferase	General (non sugar-specific) component of the phosphoenolpyruvate-dependent sugar phosphotransferase system (sugar PTS). This major carbohydrate active-transport system catalyzes the phosphorylation of incoming sugar substrates concomitantly with their translocation across the cell membrane. Enzyme I transfers the phosphoryl group from phosphoenolpyruvate (PEP) to the phosphoryl carrier protein (…	ptsI	0.387502	0.754306	0.132215	DMSO	0.917693	0.787482	0.0796735	Amp	2.7538	-5.94899	0.00400588	0.259136	Sig		0.53019
K562_RS03775	K562_RS03775	CP053300	795026	795778	No_name	molybdopterin-synthase adenylyltransferase MoeB	PFAM UBA THIF-type NAD FAD binding protein	moeB	-0.264126	2.49832	0.336092	DMSO	-0.768107	2.40836	1.40156	Amp	17.3902	0.605653	0.57743	0.948571	Not_Sig		-0.503981
K562_RS03780	K562_RS03780	CP053300	795883	797436	No_name	S41 family peptidase	Belongs to the peptidase S41A family	0	0.580812	0.529204	0.653655	DMSO	0.663149	0.523872	0.443059	Amp	2.17658	-0.1806	0.865463	0.981699	Not_Sig		0.0823376
K562_RS03785	K562_RS03785	CP053300	797693	798439	No_name	2	Belongs to the phosphoglycerate mutase family. BPG- dependent PGAM subfamily	gpmA	0.921097	0.294353	0.380235	DMSO	0.51868	1.09055	0.0594182	Amp	40.9512	NA	NA	NA	Not_tested		-0.402417
K562_RS03790	K562_RS03790	CP053300	798576	798998	No_name	rhodanese-like domain-containing protein	PFAM Rhodanese domain protein	0	1.07542	0.026554	0.216315	DMSO	0.69872	0.174277	0.0856196	Amp	6.38302	2.80459	0.0485837	0.579426	Sig		-0.376703
K562_RS03795	K562_RS03795	CP053300	798995	799255	No_name	glutaredoxin 3	Has a glutathione-disulfide oxidoreductase activity in the presence of NADPH and glutathione reductase. Reduces low molecular weight disulfides and proteins	grxC	0.132926	1.77029	0.590412	DMSO	-0.123094	1.7387	0.159629	Amp	13.6801	0.725034	0.508573	0.936979	Not_Sig		-0.25602
K562_RS03800	K562_RS03800	CP053300	799363	799854	No_name	protein-export chaperone SecB	One of the proteins required for the normal export of preproteins out of the cell cytoplasm. It is a molecular chaperone that binds to a subset of precursor proteins, maintaining them in a translocation-competent state. It also specifically binds to its receptor SecA	secB	-0.258316	1.2163	0.223679	DMSO	0.324302	1.54965	0.462867	Amp	4.28216	-1.96297	0.121141	0.698954	Not_Sig		0.582618
K562_RS03810	K562_RS03810	CP053300	800971	801495	No_name	O-acetyl-ADP-ribose deacetylase	PFAM Appr-1-p processing domain protein	0	-1.18515	1.73001	0.7009	DMSO	-1.23697	1.77109	0.412802	Amp	2.8829	0.110328	0.917463	0.988983	Not_Sig		-0.0518136
K562_RS03815	K562_RS03815	CP053300	801523	801993	No_name	tRNA (uridine(34)/cytosine(34)/5- carboxymethylaminomethyluridine(34)-2'-O)- methyltransferase TrmL	Methylates the ribose at the nucleotide 34 wobble position in the two leucyl isoacceptors tRNA(Leu)(CmAA) and tRNA(Leu)(cmnm5UmAA). Catalyzes the methyl transfer from S- adenosyl-L-methionine to the 2'-OH of the wobble nucleotide	trmL	0.816283	1.57351	0.603381	DMSO	0.630039	1.91415	0.323548	Amp	3.47781	0.471163	0.662072	0.960654	Not_Sig		-0.186244
K562_RS03820	K562_RS03820	CP053300	802096	802893	No_name	ComF family protein	Competence protein	0	-0.0130894	2.25143	0.341317	DMSO	-0.363147	2.28541	0.353462	Amp	1.07243	1.23396	0.284762	0.844381	Not_Sig		-0.350057
K562_RS03825	K562_RS03825	CP053300	802975	803940	No_name	methyltransferase domain-containing protein	Converts the free carboxyl group of a malonyl-thioester to its methyl ester by transfer of a methyl group from S-adenosyl- L-methionine (SAM). It allows to synthesize pimeloyl-ACP via the fatty acid synthetic pathway	bioC	-2.41043	1.27626	0.693953	DMSO	-1.6734	2.25708	0.352208	Amp	3.88206	-1.64038	0.17627	0.757603	Not_Sig		0.737028
K562_RS03830	K562_RS03830	CP053300	804136	804660	No_name	DUF2244 domain-containing protein	Integral membrane protein (DUF2244)	0	-0.642986	1.75585	0.366928	DMSO	-0.491723	1.76917	0.185402	Amp	3.91681	-0.637289	0.558587	0.945473	Not_Sig		0.151263
K562_RS03835	K562_RS03835	CP053300	804717	806315	No_name	cytochrome c oxidase subunit II	Subunits I and II form the functional core of the enzyme complex. Electrons originating in cytochrome c are transferred via heme a and Cu(A) to the binuclear center formed by heme a3 and Cu(B)	coxB	-0.379063	1.95078	0.287664	DMSO	-0.421579	1.79323	0.171718	Amp	2.80633	0.219807	0.836784	0.980102	Not_Sig		-0.0425157
K562_RS03840	K562_RS03840	CP053300	806359	807966	No_name	cytochrome c oxidase subunit I	Cytochrome c oxidase is the component of the respiratory chain that catalyzes the reduction of oxygen to water. Subunits 1- 3 form the functional core of the enzyme complex. CO I is the catalytic subunit of the enzyme. Electrons originating in cytochrome c are transferred via the copper A center of subunit 2 and heme A of subunit 1 to the bimetallic center formed by heme A3 and copper B	coxA	-1.11692	2.24804	0.337103	DMSO	-0.907578	1.79241	0.11853	Amp	8.08849	-1.01472	0.367627	0.890313	Not_Sig		0.209344
K562_RS03845	K562_RS03845	CP053300	808047	808187	No_name	hypothetical protein	0	0	1.04981	0.0445381	0.183615	DMSO	0.684017	0.334765	0.467088	Amp	6.47118	1.26238	0.275397	0.836015	Not_Sig		-0.365789
K562_RS03850	K562_RS03850	CP053300	808223	808834	No_name	cytochrome c oxidase assembly protein	Cytochrome C oxidase assembly protein ctag	ctaG	-1.61625	3.10596	0.917971	DMSO	-1.13684	2.48214	0.219683	Amp	17.4608	-0.879721	0.428688	0.915703	Not_Sig		0.47941
K562_RS03855	K562_RS03855	CP053300	808851	809051	No_name	DUF2970 domain-containing protein	Protein of unknown function (DUF2970)	0	-0.0503357	1.56718	0.355221	DMSO	0.271685	2.60359	0.709929	Amp	3.99422	-0.702606	0.521038	0.940165	Not_Sig		0.322021
K562_RS03860	K562_RS03860	CP053300	809210	810067	No_name	cytochrome c oxidase subunit 3	Cytochrome c oxidase subunit III	coxC	-0.858426	1.79196	0.1442	DMSO	-0.863893	1.83834	0.200655	Amp	1.93628	0.0383196	0.971269	0.997164	Not_Sig		-0.0054667
K562_RS03865	K562_RS03865	CP053300	810242	810451	No_name	twin transmembrane helix small protein	Protein of unknown function (DUF2909)	0	-0.561571	2.02711	0.249665	DMSO	-0.76547	2.06804	0.344687	Amp	1.90605	0.829785	0.453311	0.921271	Not_Sig		-0.203898
K562_RS03870	K562_RS03870	CP053300	810446	811246	No_name	SURF1 family protein	#N/A	#N/A	-3.46748	0.247415	0.609709	DMSO	-3.64826	0.311632	0.526204	Amp	1.34257	0.388766	0.717256	0.965921	Not_Sig		-0.180771
K562_RS03875	K562_RS03875	CP053300	811307	811933	No_name	cytochrome c oxidase subunit I	signal sequence binding	sco1	-0.499447	2.22894	0.369863	DMSO	-0.455393	2.11678	0.61415	Amp	2.75719	-0.106431	0.920364	0.989142	Not_Sig		0.0440536
K562_RS03880	K562_RS03880	CP053300	811959	813071	No_name	COX15/CtaA family protein	cytochrome oxidase assembly	ctaA	-0.32539	1.5929	0.155057	DMSO	-0.45467	1.60746	0.331481	Amp	4.57023	0.611876	0.57369	0.948571	Not_Sig		-0.129279
K562_RS03885	K562_RS03885	CP053300	813080	813982	No_name	protoheme IX farnesyltransferase	Converts heme B (protoheme IX) to heme O by substitution of the vinyl group on carbon 2 of heme B porphyrin ring with a hydroxyethyl farnesyl side group	ctaB	-0.0852493	0.967989	0.429821	DMSO	-0.367198	1.6828	0.25865	Amp	2.76153	0.973499	0.38543	0.897944	Not_Sig		-0.281948
K562_RS03890	K562_RS03890	CP053300	814001	814618	No_name	SCO family protein	Electron transport protein SCO1 SenC	sco2	-0.564074	1.95239	0.3698	DMSO	-0.392924	2.01696	0.312694	Amp	1.3986	-0.612121	0.573543	0.948571	Not_Sig		0.17115
K562_RS03895	K562_RS03895	CP053300	814771	815061	No_name	hypothetical protein	PFAM YCII-related	0	-1.53016	2.81046	0.369188	DMSO	-2.07179	2.74034	0.786347	Amp	4.53662	1.07992	0.340945	0.883263	Not_Sig		-0.541628
K562_RS03900	K562_RS03900	CP053300	815293	816930	No_name	methyl-accepting chemotaxis protein	Cache type 2 domain protein	0	-0.155965	1.62191	0.177851	DMSO	-0.521211	2.11147	0.131752	Amp	1.82221	2.85822	0.0460122	0.570475	Sig		-0.365246
K562_RS03905	K562_RS03905	CP053300	817157	817972	No_name	MetQ/NlpA family ABC transporter substrate-binding protein	Belongs to the nlpA lipoprotein family	0	0.317713	1.38893	0.159275	DMSO	0.604347	1.01271	0.251026	Amp	2.48396	-1.66996	0.17025	0.750196	Not_Sig		0.286634
K562_RS03910	K562_RS03910	CP053300	818059	818376	No_name	hypothetical protein	0	0	0.567748	0.401914	0.897913	DMSO	0.843155	0.0810508	0.760072	Amp	1.39559	-0.405486	0.705872	0.965336	Not_Sig		0.275408
K562_RS03915	K562_RS03915	CP053300	818709	819674	No_name	ABC transporter substrate-binding protein	ABC transporter	0	0.738313	0.788285	0.139213	DMSO	0.53554	1.08161	0.340053	Amp	5.96667	0.955826	0.393287	0.905265	Not_Sig		-0.202774
K562_RS03920	K562_RS03920	CP053300	819814	820710	No_name	ABC transporter permease	Belongs to the binding-protein-dependent transport system permease family	0	-0.270917	1.24561	0.432598	DMSO	-0.0432983	1.84432	0.0675791	Amp	40.9774	NA	NA	NA	Not_tested		0.227619
K562_RS03925	K562_RS03925	CP053300	820712	821506	No_name	ABC transporter ATP-binding protein	Abc transporter	0	1.1601	0.432019	0.356975	DMSO	1.08001	0.0391829	0.108283	Amp	10.8682	0.371843	0.72887	0.96687	Not_Sig		-0.0800848
K562_RS03930	K562_RS03930	CP053300	821666	822373	No_name	translesion DNA synthesis-associated protein ImuA	Component of the SOS system and an inhibitor of cell division. Accumulation of SulA causes rapid cessation of cell division and the appearance of long, non-septate filaments. In the presence of GTP, binds a polymerization-competent form of FtsZ in a 1 1 ratio, thus inhibiting FtsZ polymerization and therefore preventing it from participating in the assembly of the Z ring. This mechanism prevents …	imuA	-0.196385	0.432019	0.576342	DMSO	0.750557	0.0391829	0.363018	Amp	2.52061	-2.40795	0.0737184	0.650718	Not_Sig		0.946942
K562_RS03935	K562_RS03935	CP053300	822306	823802	No_name	DNA polymerase Y family protein	DNA polymerase	0	-0.214232	2.58502	0.259871	DMSO	0.132969	1.56701	0.439251	Amp	2.85699	-1.17831	0.303984	0.852608	Not_Sig		0.347201
K562_RS03940	K562_RS03940	CP053300	823809	827024	No_name	error-prone DNA polymerase	DNA polymerase involved in damage-induced mutagenesis and translesion synthesis (TLS). It is not the major replicative DNA polymerase	dnaE2	0.0756286	1.44163	0.100331	DMSO	-0.303941	1.80667	0.363668	Amp	13.1384	1.74268	0.156348	0.735008	Not_Sig		-0.379569
K562_RS03945	K562_RS03945	CP053300	827308	828138	No_name	alpha/beta hydrolase	PFAM alpha beta hydrolase fold	0	0.0863944	1.55866	0.188744	DMSO	0.0142605	1.51305	0.303696	Amp	2.58902	0.349414	0.744399	0.967973	Not_Sig		-0.0721338
K562_RS03950	K562_RS03950	CP053300	828502	829509	No_name	helix-turn-helix domain-containing protein	DJ-1/PfpI family	0	-0.160595	1.53249	0.149524	DMSO	-0.103052	1.51676	0.0177501	Amp	70.9609	NA	NA	NA	Not_tested		0.0575423
K562_RS03955	K562_RS03955	CP053300	829635	831086	No_name	short-chain fatty acid transporter	Short chain fatty acid transporter	0	-0.873178	2.73408	0.42008	DMSO	-0.361129	2.34569	0.368217	Amp	1.30153	-1.58767	0.187555	0.763838	Not_Sig		0.512049
K562_RS03960	K562_RS03960	CP053300	831112	832047	No_name	ornithine cyclodeaminase family protein	Ornithine cyclodeaminase/mu-crystallin family	0	0.92486	0.18917	0.141248	DMSO	1.16235	0.219987	0.345044	Amp	5.96736	-1.10331	0.331804	0.877197	Not_Sig		0.237494
K562_RS03965	K562_RS03965	CP053300	832072	835518	No_name	molybdopterin-dependent oxidoreductase	Molydopterin dinucleotide binding domain	0	-0.571949	1.932	0.435976	DMSO	-0.2166	1.66424	0.236755	Amp	3.39099	-1.24061	0.282545	0.842647	Not_Sig		0.355349
K562_RS03970	K562_RS03970	CP053300	835702	836613	No_name	LysR family transcriptional regulator	LysR substrate binding domain	0	0.0843188	1.63811	0.146102	DMSO	0.108798	1.77127	0.21287	Amp	2.12285	-0.16422	0.877522	0.982574	Not_Sig		0.0244791
K562_RS03975	K562_RS03975	CP053300	836915	837649	No_name	GntR family transcriptional regulator	regulatory protein GntR HTH	0	0.859714	0.407925	0.595925	DMSO	1.00188	0.0830303	0.260542	Amp	5.23153	-0.378606	0.724218	0.965921	Not_Sig		0.142168
K562_RS03980	K562_RS03980	CP053300	837736	838839	No_name	N-acetylglucosamine-6-phosphate deacetylase	Belongs to the metallo-dependent hydrolases superfamily. NagA family	nagA	0.475329	0.845099	0.171043	DMSO	0.210525	1.29377	0.21955	Amp	1.64762	1.64799	0.174701	0.756893	Not_Sig		-0.264804
K562_RS03985	K562_RS03985	CP053300	838832	839863	No_name	SIS domain-containing protein	PFAM sugar isomerase (SIS)	0	0.648899	0.552652	0.267177	DMSO	-0.207637	1.62628	0.152391	Amp	3.07383	4.82331	0.00850251	0.328288	Sig		-0.856536
K562_RS03990	K562_RS03990	CP053300	839879	842459	No_name	phosphoenolpyruvate--protein phosphotransferase	#N/A	#N/A	0.0151727	1.16371	0.0588453	DMSO	-0.118675	1.51951	0.427884	Amp	52.8724	NA	NA	NA	Not_tested		-0.133847
K562_RS03995	K562_RS03995	CP053300	842546	844312	No_name	PTS transporter subunit EIIC	PTS system, N-acetylglucosamine-specific	nagE	-0.513737	1.81204	0.328025	DMSO	0.00241165	1.95637	0.812961	Amp	6.14221	-1.01979	0.365487	0.889894	Not_Sig		0.516149
K562_RS04000	K562_RS04000	CP053300	844493	846979	No_name	carbohydate-binding domain-containing protein	Putative carbohydrate binding domain	chb	0.393548	1.14321	0.290612	DMSO	0.715981	0.668485	0.453649	Amp	2.43675	-1.0366	0.358472	0.886667	Not_Sig		0.322434
K562_RS04010	K562_RS04010	CP053300	847735	848871	No_name	cytochrome d ubiquinol oxidase subunit II	Cytochrome d ubiquinol oxidase, subunit II	cydB	0.600137	0.905378	0.182947	DMSO	0.627734	1.02276	0.501333	Amp	7.50936	-0.0895661	0.932937	0.991607	Not_Sig		0.0275966
K562_RS04015	K562_RS04015	CP053300	848903	850483	No_name	cytochrome ubiquinol oxidase subunit I	Ubiquinol oxidase, subunit I	cydA	0.24791	1.19715	0.204131	DMSO	0.14768	1.05572	0.179736	Amp	1.28988	0.638285	0.558	0.945332	Not_Sig		-0.100229
K562_RS04020	K562_RS04020	CP053300	850473	850739	No_name	hypothetical protein	0	0	0.703824	0.391986	0.43699	DMSO	-0.131782	1.59829	0.23919	Amp	3.33777	2.90526	0.0438859	0.561021	Sig		-0.835605
K562_RS04030	K562_RS04030	CP053300	852402	852971	No_name	acyloxyacyl hydrolase	Has lipid A 3-O-deacylase activity. Hydrolyzes the ester bond at the 3 position of lipid A, a bioactive component of lipopolysaccharide (LPS), thereby releasing the primary fatty acyl moiety	0	0.0899708	1.77681	0.39082	DMSO	0.155215	1.18654	0.524602	Amp	1.8018	-0.172745	0.87124	0.981699	Not_Sig		0.0652439
K562_RS04035	K562_RS04035	CP053300	853017	853400	No_name	nuclear transport factor 2 family protein	Domain of unknown function (DUF4440)	0	-0.389401	1.58107	0.152458	DMSO	0.572427	0.36858	0.385356	Amp	6.38887	-4.01994	0.0158652	0.412155	Sig		0.961828
K562_RS04040	K562_RS04040	CP053300	853544	855190	No_name	2-isopropylmalate synthase	Catalyzes the condensation of the acetyl group of acetyl-CoA with 3-methyl-2-oxobutanoate (2-oxoisovalerate) to form 3-carboxy-3-hydroxy-4-methylpentanoate (2-isopropylmalate)	0	0.280897	1.05444	0.127425	DMSO	0.371903	1.08333	0.0907667	Amp	1.97085	-1.00754	0.370675	0.891197	Not_Sig		0.0910059
K562_RS04045	K562_RS04045	CP053300	855559	856533	No_name	DNA-binding protein YbiB	glycosyl transferase	trpD3	0.251365	1.28809	0.435241	DMSO	0.354904	1.06197	0.252382	Amp	2.97401	-0.356445	0.739514	0.967973	Not_Sig		0.103539
K562_RS04050	K562_RS04050	CP053300	856713	857357	No_name	maleylacetoacetate isomerase	maleylacetoacetate isomerase	maiA	0.319451	1.43676	0.461182	DMSO	0.518234	1.0428	0.141491	Amp	10.624	-0.713731	0.514827	0.938769	Not_Sig		0.198783
K562_RS04055	K562_RS04055	CP053300	857443	858603	No_name	signal recognition particle-docking protein FtsY	Involved in targeting and insertion of nascent membrane proteins into the cytoplasmic membrane. Acts as a receptor for the complex formed by the signal recognition particle (SRP) and the ribosome-nascent chain (RNC). Interaction with SRP-RNC leads to the transfer of the RNC complex to the Sec translocase for insertion into the membrane, the hydrolysis of GTP by both Ffh and FtsY, and the dissocia…	ftsY	-3.27679	1.43676	2.1703	DMSO	0.274723	1.0428	1.377	Amp	2.48414	-2.39328	0.0749004	0.657345	Not_Sig		3.55151
K562_RS04060	K562_RS04060	CP053300	858820	859434	No_name	16S rRNA (guanine(966)-N(2))-methyltransferase RsmD	Methyltransferase	0	-1.44527	3.29929	1.11167	DMSO	-1.7173	3.14161	1.01659	Amp	1.19582	0.31277	0.770084	0.972764	Not_Sig		-0.272024
K562_RS04075	K562_RS04075	CP053300	860447	861514	No_name	histidinol-phosphate transaminase	Belongs to the class-II pyridoxal-phosphate-dependent aminotransferase family. Histidinol-phosphate aminotransferase subfamily	hisC1	0.382126	0.972878	0.346671	DMSO	0.095222	1.54552	0.273745	Amp	1.60377	1.12499	0.323529	0.86815	Not_Sig		-0.286904
K562_RS04110	K562_RS04110	CP053300	865786	867609	No_name	tetratricopeptide repeat protein	TPR repeat-containing protein	0	-0.0371791	2.05288	0.825062	DMSO	-0.214745	1.6227	0.204629	Amp	16.2569	0.361802	0.735803	0.967973	Not_Sig		-0.177566
K562_RS04115	K562_RS04115	CP053300	867857	868684	No_name	bifunctional DNA-formamidopyrimidine glycosylase/DNA-(apurinic or apyrimidinic site) lyase	Involved in base excision repair of DNA damaged by oxidation or by mutagenic agents. Acts as DNA glycosylase that recognizes and removes damaged bases. Has a preference for oxidized purines, such as 7,8-dihydro-8-oxoguanine (8-oxoG). Has AP (apurinic apyrimidinic) lyase activity and introduces nicks in the DNA strand. Cleaves the DNA backbone by beta-delta elimination to generate a single-strand …	fpg	0.421184	0.896069	0.188082	DMSO	0.324455	1.78592	0.86011	Amp	20.9128	0.190293	0.858347	0.981647	Not_Sig		-0.0967296
K562_RS04120	K562_RS04120	CP053300	868709	869815	No_name	A/G-specific adenine glycosylase	a g-specific adenine glycosylase	mutY	0.266049	1.70144	0.157233	DMSO	0.0363767	1.46358	0.449747	Amp	8.18182	0.834953	0.450711	0.920316	Not_Sig		-0.229673
K562_RS04125	K562_RS04125	CP053300	869933	870568	No_name	LON peptidase substrate-binding domain-containing protein	PFAM peptidase S16 lon domain protein	0	-0.112337	2.10026	0.419283	DMSO	0.829247	0.555011	0.810536	Amp	3.73706	-1.78714	0.148445	0.725963	Not_Sig		0.941584
K562_RS04130	K562_RS04130	CP053300	870595	871503	No_name	RNase adapter RapZ	Displays ATPase and GTPase activities	0	-1.08672	1.45134	0.601388	DMSO	-1.20558	1.63001	0.472257	Amp	1.62163	0.269231	0.801069	0.9752	Not_Sig		-0.118858
K562_RS04145	K562_RS04145	CP053300	873384	873743	No_name	ribosome-associated translation inhibitor RaiA	sigma 54 modulation protein ribosomal protein S30EA	rpoX	-0.351204	1.81149	0.713031	DMSO	0.202864	1.45782	0.528881	Amp	1.81761	-1.081	0.340518	0.883232	Not_Sig		0.554068
K562_RS04150	K562_RS04150	CP053300	873902	875407	No_name	RNA polymerase factor sigma-54	Sigma factors are initiation factors that promote the attachment of RNA polymerase to specific initiation sites and are then released	rpoN	-2.66803	1.38028	0.155753	DMSO	-2.30601	1.33607	0.0968385	Amp	2.58687	-3.41887	0.0268079	0.485058	Sig		0.362016
K562_RS04170	K562_RS04170	CP053300	877657	878193	No_name	HAD family hydrolase	3-deoxy-D-manno-octulosonate 8-phosphate phosphatase	kdsC	1.42902	1.38028	0.559628	DMSO	1.48479	1.33607	0.499224	Amp	1.25663	-0.128812	0.903723	0.984911	Not_Sig		0.0557728
K562_RS04180	K562_RS04180	CP053300	879302	881308	No_name	monovalent cation:proton antiporter family protein	Belongs to the monovalent cation proton antiporter 2 (CPA2) transporter (TC 2.A.37) family	0	0.0841178	1.55418	0.0765846	DMSO	0.312044	1.47866	0.378059	Amp	24.3689	-1.02344	0.363956	0.888977	Not_Sig		0.227926
K562_RS04185	K562_RS04185	CP053300	881386	881952	No_name	adenine phosphoribosyltransferase	Catalyzes a salvage reaction resulting in the formation of AMP, that is energically less costly than de novo synthesis	apt	0.548726	1.23522	0.402138	DMSO	0.609017	1.14689	0.172473	Amp	5.43636	-0.238658	0.823099	0.977153	Not_Sig		0.0602915
K562_RS04190	K562_RS04190	CP053300	882028	882642	No_name	LysE family translocator	PFAM Lysine exporter protein (LYSE YGGA)	0	0.848436	0.46038	0.412396	DMSO	0.680821	0.804058	0.544742	Amp	1.74483	0.424914	0.69276	0.963653	Not_Sig		-0.167615
K562_RS04195	K562_RS04195	CP053300	882648	883514	No_name	DUF4743 domain-containing protein	NUDIX hydrolase	0	-0.229956	1.83509	0.447697	DMSO	-0.184896	1.59628	0.745102	Amp	2.7699	-0.0897855	0.932774	0.991607	Not_Sig		0.0450603
K562_RS04200	K562_RS04200	CP053300	883588	884472	No_name	formyltetrahydrofolate deformylase	Catalyzes the hydrolysis of 10-formyltetrahydrofolate (formyl-FH4) to formate and tetrahydrofolate (FH4)	purU	0.0932995	1.8572	0.134056	DMSO	0.199372	0.841293	0.670739	Amp	25.0344	-0.268598	0.801523	0.975318	Not_Sig		0.106072
K562_RS04205	K562_RS04205	CP053300	884566	885648	No_name	hypothetical protein	membrane	0	-1.04405	2.29236	0.246329	DMSO	-0.987531	2.38222	0.480043	Amp	3.79778	-0.181441	0.864845	0.981699	Not_Sig		0.0565209
K562_RS04210	K562_RS04210	CP053300	885869	888754	No_name	excinuclease ABC subunit UvrA	The UvrABC repair system catalyzes the recognition and processing of DNA lesions. UvrA is an ATPase and a DNA-binding protein. A damage recognition complex composed of 2 UvrA and 2 UvrB subunits scans DNA for abnormalities. When the presence of a lesion has been verified by UvrB, the UvrA molecules dissociate	uvrA	-0.169194	1.5944	0.40748	DMSO	-0.294707	1.33885	0.266299	Amp	2.34139	0.446598	0.678278	0.963653	Not_Sig		-0.125513
K562_RS04215	K562_RS04215	CP053300	889019	890206	No_name	MFS transporter	Major facilitator Superfamily	0	-0.0542967	1.59015	0.626839	DMSO	0.15511	0.987529	0.565724	Amp	1.22773	-0.429552	0.689649	0.963653	Not_Sig		0.209407
K562_RS04225	K562_RS04225	CP053300	890986	891516	No_name	G/U mismatch-specific DNA glycosylase	Uracil DNA glycosylase superfamily	0	-1.83387	2.07934	1.14956	DMSO	0.754928	0.141716	0.390958	Amp	8.64581	-3.69284	0.0209665	0.461362	Sig		2.5888
K562_RS04230	K562_RS04230	CP053300	891503	892126	No_name	DNA-3-methyladenine glycosylase	Methylpurine-DNA glycosylase (MPG)	0	-0.312617	1.9446	0.355058	DMSO	-0.312877	1.7725	0.156959	Amp	5.11711	0.00116025	0.99913	0.999673	Not_Sig		-0.000260047
K562_RS04235	K562_RS04235	CP053300	892228	892992	No_name	ParA family protein	PFAM Cobyrinic acid a,c-diamide synthase	0	-0.0714531	1.09283	0.723048	DMSO	0.33715	1.08674	0.358777	Amp	4.06149	-0.876797	0.430099	0.915703	Not_Sig		0.408603
K562_RS04240	K562_RS04240	CP053300	893490	894074	No_name	TIGR01841 family phasin	TIGRFAM phasin family protein	0	0.601974	0.834731	0.25539	DMSO	0.799724	0.571397	0.352691	Amp	1.90714	-0.78658	0.475512	0.929954	Not_Sig		0.197751
K562_RS04250	K562_RS04250	CP053300	895767	896510	No_name	acetoacetyl-CoA reductase	Acetoacetyl-CoA reductase	0	0.613363	0.366109	0.299337	DMSO	-0.851471	3.75405	0.524258	Amp	3.06739	4.20272	0.0136658	0.399708	Sig		-1.46483
K562_RS04260	K562_RS04260	CP053300	896924	897253	No_name	hypothetical protein	0	0	0.168321	0.321205	0.428544	DMSO	1.45198	0.95633	1.20777	Amp	7.94285	-1.7349	0.157775	0.739114	Not_Sig		1.28365
K562_RS04265	K562_RS04265	CP053300	897250	897753	No_name	hotdog family protein	dehydratase	0	-0.529513	0.181179	0.507328	DMSO	1.67255	0.168667	0.49891	Amp	1.03403	-5.3603	0.00584513	0.278775	Sig		2.20206
K562_RS04270	K562_RS04270	CP053300	897750	898568	No_name	beta-ketoacyl synthase chain length factor	Beta-ketoacyl synthase, N-terminal domain	0	1.27824	0.0428736	0.218401	DMSO	0.976817	0.518839	0.658721	Amp	9.09689	0.752295	0.493722	0.930894	Not_Sig		-0.301423
K562_RS04275	K562_RS04275	CP053300	898577	899800	No_name	beta-ketoacyl-[acyl-carrier-protein] synthase family protein	Belongs to the beta-ketoacyl-ACP synthases family	0	1.48623	0.10592	0.629525	DMSO	1.34246	0.326136	0.472667	Amp	1.77385	0.316318	0.76758	0.972764	Not_Sig		-0.143767
K562_RS04280	K562_RS04280	CP053300	899864	900757	No_name	polysaccharide deacetylase family protein	polysaccharide deacetylase	0	0.674105	1.06056	0.581995	DMSO	0.880763	0.0944442	0.413718	Amp	1.97892	-0.501278	0.642507	0.9605	Not_Sig		0.206658
K562_RS04285	K562_RS04285	CP053300	900754	903222	No_name	MMPL family transporter	MMPL family	0	0.706485	1.80912	0.736826	DMSO	0.953136	0.880397	0.245745	Amp	8.99	-0.550017	0.611576	0.955832	Not_Sig		0.246651
K562_RS04290	K562_RS04290	CP053300	903222	903866	No_name	outer membrane lipoprotein carrier protein LolA	Outer membrane lipoprotein carrier protein LolA	0	-0.0548817	2.02498	0.21454	DMSO	0.488103	1.57597	0.01252	Amp	293.637	NA	NA	NA	Not_tested		0.542985
K562_RS04295	K562_RS04295	CP053300	903863	904846	No_name	acyl-CoA synthetase	Bacterial lipid A biosynthesis acyltransferase	0	1.29773	0.0613644	0.192435	DMSO	1.32719	0.0233916	0.121681	Amp	2.50106	-0.224171	0.833609	0.97956	Not_Sig		0.0294674
K562_RS04300	K562_RS04300	CP053300	904843	906600	No_name	acyl-CoA synthetase family protein	AMP-binding enzyme	0	-0.0333654	1.27246	0.341406	DMSO	0.0215001	1.28175	0.245775	Amp	1.9296	-0.225901	0.832352	0.979023	Not_Sig		0.0548655
K562_RS04305	K562_RS04305	CP053300	906660	907313	No_name	membrane protein	membrane	0	0.141115	0.360972	1.92519	DMSO	0.587973	0.781064	2.25362	Amp	1.37029	-0.261129	0.806886	0.975481	Not_Sig		0.446858
K562_RS04310	K562_RS04310	CP053300	907859	908143	No_name	PRK09184 family protein	#N/A	#N/A	-4.69088	0.168538	0.583368	DMSO	-3.06851	0.167348	3.50492	Amp	36.097	-0.790861	0.473275	0.928958	Not_Sig		1.62238
K562_RS04315	K562_RS04315	CP053300	908213	908929	No_name	3-oxoacyl-ACP reductase FabG	reductase	0	1.69354	0.0169103	0.191642	DMSO	1.21724	0.0831946	0.380928	Amp	3.95098	1.9347	0.125138	0.701791	Not_Sig		-0.476309
K562_RS04320	K562_RS04320	CP053300	908967	910271	No_name	endoribonuclease L-PSP	pteridine-dependent deoxygenase	0	0.80836	0.276173	0.0668031	DMSO	1.07874	0.166954	0.359182	Amp	28.9091	-1.28183	0.269157	0.83512	Not_Sig		0.270376
K562_RS04325	K562_RS04325	CP053300	910397	911179	No_name	glycosyltransferase family 2 protein	glycosyl transferase family 2	0	-0.296394	1.59145	0.318275	DMSO	0.0816498	2.12812	1.2065	Amp	14.3698	-0.524767	0.627485	0.95791	Not_Sig		0.378044
K562_RS04330	K562_RS04330	CP053300	911382	912143	No_name	M48 family metalloprotease	peptidase M48, Ste24p	0	-0.416765	1.51158	0.160515	DMSO	-0.0486869	0.930392	0.328281	Amp	4.18274	-1.74464	0.15599	0.734914	Not_Sig		0.368078
K562_RS04335	K562_RS04335	CP053300	912255	913955	No_name	lactate permease LctP family transporter	permease	glcA	0.482096	1.21424	0.415086	DMSO	0.465848	1.40382	0.0954603	Amp	18.9073	0.0660741	0.950489	0.995107	Not_Sig		-0.016248
K562_RS04340	K562_RS04340	CP053300	914004	915449	No_name	iron-sulfur cluster-binding protein	TIGRFAM iron-sulfur cluster binding protein	0	-0.0281517	1.3084	0.346989	DMSO	0.198917	1.45694	0.222431	Amp	2.43354	-0.954227	0.394005	0.905265	Not_Sig		0.227069
K562_RS04345	K562_RS04345	CP053300	915446	916171	No_name	lactate utilization protein C	LUD domain	0	1.55205	0.0994426	0.294294	DMSO	1.39736	0.118429	0.187889	Amp	2.45334	0.76738	0.485645	0.930054	Not_Sig		-0.154693
K562_RS04350	K562_RS04350	CP053300	916168	916965	No_name	(Fe-S)-binding protein	Cysteine-rich domain	0	1.23659	0.0994426	0.409583	DMSO	1.05218	0.118429	0.301884	Amp	1.8408	0.627728	0.564237	0.948418	Not_Sig		-0.184404
K562_RS04355	K562_RS04355	CP053300	917094	917810	No_name	FadR family transcriptional regulator	Transcriptional regulator	0	1.15976	0.0827383	0.246831	DMSO	1.14662	0.286548	0.49157	Amp	3.96616	0.0413815	0.968975	0.997164	Not_Sig		-0.0131418
K562_RS04360	K562_RS04360	CP053300	918013	919635	No_name	phospholipase D family protein	Phospholipase D Transphosphatidylase	0	0.765136	1.29415	1.43156	DMSO	0.965877	0.219765	0.451989	Amp	10.0314	-0.231608	0.828208	0.977153	Not_Sig		0.200741
K562_RS04365	K562_RS04365	CP053300	919879	920652	No_name	class II aldolase/adducin family protein	Class II aldolase adducin family protein	0	0.911024	0.243969	0.199663	DMSO	0.955147	0.118125	0.261068	Amp	1.70966	-0.23253	0.82754	0.977153	Not_Sig		0.0441238
K562_RS04370	K562_RS04370	CP053300	920683	921684	No_name	hypothetical protein	0	0	-0.138752	2.01487	0.0835651	DMSO	0.546908	1.18034	0.31686	Amp	14.3776	-3.6241	0.022276	0.461362	Sig		0.68566
K562_RS04375	K562_RS04375	CP053300	922175	922609	No_name	CHRD domain-containing protein	PFAM CHRD domain containing protein	0	-0.105913	1.33964	0.344155	DMSO	-0.259183	1.84528	0.722564	Amp	4.40804	0.331697	0.756769	0.971253	Not_Sig		-0.153269
K562_RS04380	K562_RS04380	CP053300	922699	923661	No_name	alpha/beta hydrolase	Alpha beta hydrolase	0	0.694012	1.09583	0.470266	DMSO	1.19366	0.842733	0.957716	Amp	4.14749	-0.811117	0.462801	0.924318	Not_Sig		0.499649
K562_RS04385	K562_RS04385	CP053300	923631	924473	No_name	EcsC family protein	EcsC protein family	0	0.973228	0.564584	0.36698	DMSO	0.75872	1.19911	0.36097	Amp	1.03358	0.721777	0.510369	0.937368	Not_Sig		-0.214508
K562_RS04390	K562_RS04390	CP053300	924580	926175	No_name	MFS transporter	Major facilitator Superfamily	0	0.835392	0.97191	0.441655	DMSO	0.884337	1.07548	0.110901	Amp	15.8598	-0.186168	0.861373	0.981699	Not_Sig		0.0489446
K562_RS04400	K562_RS04400	CP053300	926748	927329	No_name	DJ-1/PfpI family protein	Intracellular protease, PfpI family	0	0.771062	0.209373	0.496856	DMSO	0.418579	0.556564	0.721492	Amp	2.10863	0.69692	0.524233	0.940778	Not_Sig		-0.352483
K562_RS04405	K562_RS04405	CP053300	927487	928767	No_name	amino acid deaminase	amino acid	0	-0.200811	1.54233	0.343037	DMSO	-0.370622	1.96944	0.0679398	Amp	25.4938	0.841068	0.447651	0.919479	Not_Sig		-0.169811
K562_RS04410	K562_RS04410	CP053300	928887	929825	No_name	MurR/RpiR family transcriptional regulator	Transcriptional regulator	0	-0.458022	1.569	0.307732	DMSO	-1.1189	1.79329	0.331968	Amp	1.16372	2.52878	0.0647485	0.620747	Not_Sig		-0.660881
K562_RS04415	K562_RS04415	CP053300	929828	931309	No_name	D-aminoacylase	D-aminoacylase	dan	0.361084	1.19758	0.377093	DMSO	0.613031	0.68474	0.210827	Amp	3.19922	-1.01009	0.369592	0.891107	Not_Sig		0.251947
K562_RS04420	K562_RS04420	CP053300	931388	931774	No_name	RidA family protein	endoribonuclease L-PSP	0	-2.32655	1.3767	0.580297	DMSO	0.292082	0.513127	0.297912	Amp	3.79424	-6.95324	0.00224786	0.211605	Sig		2.61863
K562_RS04425	K562_RS04425	CP053300	931857	932687	No_name	NADPH-dependent 7-cyano-7-deazaguanine reductaseQueF	Catalyzes the NADPH-dependent reduction of 7-cyano-7- deazaguanine (preQ0) to 7-aminomethyl-7-deazaguanine (preQ1)	queF	-1.98629	1.45751	0.774466	DMSO	-1.92809	2.29921	0.690149	Amp	1.25927	-0.0971751	0.927262	0.989739	Not_Sig		0.0581997
K562_RS04430	K562_RS04430	CP053300	932700	934223	No_name	threonine ammonia-lyase	Catalyzes the anaerobic formation of alpha-ketobutyrate and ammonia from threonine in a two-step reaction. The first step involved a dehydration of threonine and a production of enamine intermediates (aminocrotonate), which tautomerizes to its imine form (iminobutyrate). Both intermediates are unstable and short- lived. The second step is the nonenzymatic hydrolysis of the enamine imine intermedi…	ilvA	-0.370968	1.77483	0.319092	DMSO	-0.418382	1.61773	0.0358163	Amp	79.3725	NA	NA	NA	Not_tested		-0.047413
K562_RS04435	K562_RS04435	CP053300	934809	938834	No_name	DUF3683 domain-containing protein	FAD linked oxidase domain protein	glpCD	0.000648352	1.70342	0.15206	DMSO	-0.290088	1.80272	0.0229626	Amp	43.8517	NA	NA	NA	Not_tested		-0.290736
K562_RS04440	K562_RS04440	CP053300	938919	939362	No_name	HIT family protein	Histidine triad (HIT) protein	0	1.30613	0.101416	0.254905	DMSO	1.1124	0.140046	0.185954	Amp	1.87909	1.06349	0.347502	0.885816	Not_Sig		-0.193733
K562_RS04445	K562_RS04445	CP053300	939359	939772	No_name	DUF971 domain-containing protein	Protein of unknown function (DUF971)	0	-0.242143	1.10048	0.341441	DMSO	-0.122869	1.28491	0.572878	Amp	2.81509	-0.309769	0.772203	0.972764	Not_Sig		0.119274
K562_RS04455	K562_RS04455	CP053300	940598	941629	No_name	Tim44 domain-containing protein	import inner membrane translocase, subunit Tim44	0	0.709277	1.10048	1.26812	DMSO	-0.191115	1.28491	0.997964	Amp	1.61469	0.966423	0.38856	0.901154	Not_Sig		-0.900392
K562_RS04460	K562_RS04460	CP053300	941794	942420	No_name	SCP2 sterol-binding domain-containing protein	PFAM Sterol-binding domain protein	0	-0.950578	2.66635	0.603053	DMSO	-0.841731	0.86657	0.0554427	Amp	118.31	NA	NA	NA	Not_tested		0.108847
K562_RS04470	K562_RS04470	CP053300	944028	944654	No_name	SAM-dependent methyltransferase	Thiopurine S-methyltransferase	0	0.00844809	1.35416	0.120434	DMSO	0.0288065	1.29384	0.482373	Amp	16.0423	-0.0709236	0.946863	0.995107	Not_Sig		0.0203584
K562_RS04475	K562_RS04475	CP053300	944750	945103	No_name	FmdB family transcriptional regulator	Regulatory protein, FmdB family	0	0.327712	1.35416	0.873441	DMSO	-0.04399	1.29384	0.876239	Amp	1.00642	0.520369	0.630281	0.958589	Not_Sig		-0.371702
K562_RS04480	K562_RS04480	CP053300	945165	945815	No_name	DUF502 domain-containing protein	Protein of unknown function (DUF502)	0	0.754519	0.963056	0.705465	DMSO	0.122994	0.647112	0.484036	Amp	2.1242	1.27851	0.270212	0.83512	Not_Sig		-0.631526
K562_RS04490	K562_RS04490	CP053300	947844	948338	No_name	dihydroneopterin triphosphate diphosphatase	PFAM NUDIX hydrolase	ntpA	-0.917902	1.80105	0.305271	DMSO	-1.31606	1.84849	0.188463	Amp	2.62373	1.92224	0.126944	0.703306	Not_Sig		-0.398153
K562_RS04495	K562_RS04495	CP053300	948335	949609	No_name	cardiolipin synthase ClsB	Catalyzes the phosphatidyl group transfer from one phosphatidylglycerol molecule to another to form cardiolipin (CL) (diphosphatidylglycerol) and glycerol	clsB	-0.140006	1.6678	0.448545	DMSO	-0.150812	1.56375	0.218517	Amp	4.21348	0.0375142	0.971873	0.997164	Not_Sig		-0.0108065
K562_RS04500	K562_RS04500	CP053300	949810	950409	No_name	TetR/AcrR family transcriptional regulator	regulatory protein TetR	0	0.228186	0.566384	0.425386	DMSO	-0.0985409	1.81105	0.304577	Amp	1.95061	1.08166	0.340256	0.883032	Not_Sig		-0.326727
K562_RS04505	K562_RS04505	CP053300	950468	952255	No_name	acyl-CoA dehydrogenase C-terminal domain-containing protein	acyl-CoA dehydrogenase	0	-0.19135	1.97471	0.45431	DMSO	-0.501056	1.96026	0.209938	Amp	4.68298	1.07184	0.344153	0.885058	Not_Sig		-0.309707
K562_RS04510	K562_RS04510	CP053300	952369	954804	No_name	3-hydroxyacyl-CoA dehydrogenase/enoyl-CoA hydratase family protein	3-hydroxyacyl-coa dehydrogenase	0	0.175179	1.56177	0.254022	DMSO	0.032318	1.29487	0.405896	Amp	2.55322	0.516765	0.632578	0.959237	Not_Sig		-0.142861
K562_RS04515	K562_RS04515	CP053300	954875	956074	No_name	acetyl-CoA C-acyltransferase	Belongs to the thiolase family	fadA	0.0967473	2.27482	0.514719	DMSO	0.177725	2.3146	0.604638	Amp	1.37991	-0.176635	0.868378	0.981699	Not_Sig		0.0809777
K562_RS04525	K562_RS04525	CP053300	956985	957821	No_name	formate dehydrogenase accessory sulfurtransferase FdhD	Required for formate dehydrogenase (FDH) activity. Acts as a sulfur carrier protein that transfers sulfur from IscS to the molybdenum cofactor prior to its insertion into FDH	fdhD	0.834877	0.287653	0.261874	DMSO	0.640322	0.316012	0.0898112	Amp	8.50207	1.2172	0.290427	0.844936	Not_Sig		-0.194555
K562_RS04530	K562_RS04530	CP053300	957942	958424	No_name	nitrate reductase maturation protein NarM	PFAM conserved	0	0.0864199	1.90793	0.14237	DMSO	0.498478	0.711068	0.81044	Amp	32.4044	-0.867358	0.434681	0.917617	Not_Sig		0.412058
K562_RS04535	K562_RS04535	CP053300	958461	958856	No_name	acyl-CoA thioesterase	Thioesterase superfamily protein	0	0.71696	0.0782767	0.115142	DMSO	-0.126883	1.27279	0.68899	Amp	35.8059	2.09232	0.104556	0.683256	Not_Sig		-0.843843
K562_RS04540	K562_RS04540	CP053300	959032	960903	No_name	ABC transporter ATP-binding protein/permease	abc transporter	0	-0.0617234	1.85775	0.211762	DMSO	-0.357339	1.73063	0.201962	Amp	1.09941	1.74973	0.155066	0.734483	Not_Sig		-0.295616
K562_RS04545	K562_RS04545	CP053300	961109	961831	No_name	nucleotidyltransferase family protein	Nucleotidyl transferase	0	-2.42723	2.28682	0.43516	DMSO	-1.04743	2.83495	1.49972	Amp	11.8774	-1.53043	0.200656	0.773171	Not_Sig		1.3798
K562_RS04550	K562_RS04550	CP053300	961854	962903	No_name	phosphotransferase	Aminoglycoside phosphotransferase	0	0.105979	1.78327	0.248625	DMSO	-0.0442206	1.96166	0.809383	Amp	10.5979	0.307253	0.773983	0.972764	Not_Sig		-0.1502
K562_RS04560	K562_RS04560	CP053300	965540	966898	No_name	peptidylprolyl isomerase	Chaperone involved in the correct folding and assembly of outer membrane proteins. Recognizes specific patterns of aromatic residues and the orientation of their side chains, which are found more frequently in integral outer membrane proteins. May act in both early periplasmic and late outer membrane-associated steps of protein maturation	surA	-1.4198	1.46385	0.628135	DMSO	-1.33667	2.21696	0.515883	Amp	1.48253	-0.17713	0.868013	0.981699	Not_Sig		0.0831248
K562_RS04570	K562_RS04570	CP053300	967947	968774	No_name	16S rRNA (adenine(1518)-N(6)/adenine(1519)-N(6))- dimethyltransferase RsmA	Specifically dimethylates two adjacent adenosines (A1518 and A1519) in the loop of a conserved hairpin near the 3'-end of 16S rRNA in the 30S particle. May play a critical role in biogenesis of 30S subunits	ksgA	-0.52059	1.46385	3.3391	DMSO	-0.805571	2.21696	2.93632	Amp	1.29316	0.111009	0.916957	0.988771	Not_Sig		-0.284982
K562_RS04575	K562_RS04575	CP053300	968860	969795	No_name	DMT family transporter	EamA-like transporter family	0	0.72226	0.503337	0.415812	DMSO	0.965569	0.560007	0.627631	Amp	2.27831	-0.559753	0.60551	0.955832	Not_Sig		0.243309
K562_RS04580	K562_RS04580	CP053300	970180	970563	No_name	lactoylglutathione lyase	Lactoylglutathione lyase	gloA	0.233227	0.931593	0.245295	DMSO	-0.209685	1.58136	0.113818	Amp	4.64469	2.83692	0.0470142	0.574467	Sig		-0.442911
K562_RS04585	K562_RS04585	CP053300	970672	971559	No_name	M48 family metallopeptidase	Metal-dependent hydrolase	0	1.33374	0.0252625	0.153999	DMSO	1.13136	0.133443	0.270351	Amp	3.08192	1.1266	0.322923	0.867552	Not_Sig		-0.202376
K562_RS04590	K562_RS04590	CP053300	971605	972369	No_name	1-acyl-sn-glycerol-3-phosphate acyltransferase	Acyl-transferase	plsC1	-2.50545	1.20097	0.315437	DMSO	-3.87527	1.01827	0.274956	Amp	1.31613	5.66996	0.00477243	0.268802	Sig		-1.36982
K562_RS04610	K562_RS04610	CP053300	976397	978043	No_name	hypothetical protein	Tetratricopeptide TPR_2 repeat protein	0	0.25037	1.2171	0.462715	DMSO	0.54073	0.910401	0.402162	Amp	1.32381	-0.820345	0.458091	0.922405	Not_Sig		0.29036
K562_RS04615	K562_RS04615	CP053300	978116	979816	No_name	apolipoprotein N-acyltransferase	Transfers the fatty acyl group on membrane lipoproteins	lnt	-4.1912	0.0478328	0.595201	DMSO	-4.01155	0.043234	1.96262	Amp	10.873	-0.151722	0.886751	0.984281	Not_Sig		0.179651
K562_RS04620	K562_RS04620	CP053300	979869	980756	No_name	CBS domain-containing protein	CBS domain containing protein	corC	-0.206569	2.00657	0.149322	DMSO	-0.450673	2.09761	0.2264	Amp	2.29883	1.55895	0.194015	0.766713	Not_Sig		-0.244104
K562_RS04630	K562_RS04630	CP053300	981244	981876	No_name	gamma-glutamylcyclotransferase	Catalyzes the cleavage of glutathione into 5-oxo-L- proline and a Cys-Gly dipeptide. Acts specifically on glutathione, but not on other gamma-glutamyl peptides	chaC	0.196968	1.7274	0.493721	DMSO	0.0234786	1.44626	0.374576	Amp	1.73733	0.484876	0.653121	0.960654	Not_Sig		-0.17349
K562_RS04635	K562_RS04635	CP053300	981889	982665	No_name	rRNA maturation RNase YbeY	Single strand-specific metallo-endoribonuclease involved in late-stage 70S ribosome quality control and in maturation of the 3' terminus of the 16S rRNA	ybeY	1.52218	1.7274	0.832631	DMSO	1.20849	1.44626	0.680585	Amp	1.49672	0.505231	0.639964	0.960003	Not_Sig		-0.313687
K562_RS04640	K562_RS04640	CP053300	982817	983863	No_name	PhoH family protein	PFAM PhoH family protein	ybeZ	-0.319739	2.327	0.443483	DMSO	1.08458	0.756853	0.787436	Amp	3.15266	-2.69144	0.0545764	0.603319	Not_Sig		1.40431
K562_RS04645	K562_RS04645	CP053300	983893	985266	No_name	tRNA (N6-isopentenyl adenosine(37)-C2)-methylthiotransferase MiaB	Catalyzes the methylthiolation of N6- (dimethylallyl)adenosine (i(6)A), leading to the formation of 2- methylthio-N6-(dimethylallyl)adenosine (ms(2)i(6)A) at position 37 in tRNAs that read codons beginning with uridine	miaB	-0.710215	1.97557	0.753873	DMSO	-0.481664	2.65353	0.582291	Amp	1.67616	-0.415573	0.699048	0.963803	Not_Sig		0.228551
K562_RS04650	K562_RS04650	CP053300	985480	986412	No_name	LysR family transcriptional regulator	transcriptional Regulator, LysR family	0	0.235409	1.3768	0.289393	DMSO	-0.409829	2.15631	0.38565	Amp	1.77587	2.31789	0.0813247	0.65794	Not_Sig		-0.645237
K562_RS04655	K562_RS04655	CP053300	986560	987735	No_name	MFS transporter	Major facilitator Superfamily	0	-0.23645	1.99606	0.549451	DMSO	-0.436394	1.80532	0.25059	Amp	4.80764	0.573465	0.597031	0.951116	Not_Sig		-0.199944
K562_RS04660	K562_RS04660	CP053300	987955	988644	No_name	helix-turn-helix transcriptional regulator	Cupin 2, conserved barrel domain protein	0	0.801561	1.99606	4.31046	DMSO	3.67505	1.80532	3.94636	Amp	1.19304	-0.851628	0.442404	0.918354	Not_Sig		2.87349
K562_RS04665	K562_RS04665	CP053300	989099	989809	No_name	3	Catalyzes the conversion of D-ribulose 5-phosphate to formate and 3,4-dihydroxy-2-butanone 4-phosphate	0	0.358373	1.18492	0.235912	DMSO	1.19885	0.245672	0.561411	Amp	5.66317	-2.39053	0.0751245	0.657828	Not_Sig		0.840475
K562_RS04670	K562_RS04670	CP053300	989880	990566	No_name	HAD family hydrolase	HAD-hyrolase-like	0	0.392579	0.282632	0.0942894	DMSO	0.999541	0.136713	0.294446	Amp	9.75185	-3.4003	0.0272697	0.485762	Sig		0.606962
K562_RS04675	K562_RS04675	CP053300	990755	991741	No_name	inositol 2-dehydrogenase	PFAM oxidoreductase domain protein	iolG	0.385963	1.23472	0.539058	DMSO	0.620648	0.695021	0.551343	Amp	1.0461	-0.527164	0.625963	0.957139	Not_Sig		0.234684
K562_RS04680	K562_RS04680	CP053300	991780	992607	No_name	TIM barrel protein	Xylose isomerase-like TIM barrel	iolI	-2.04734	2.79653	1.23695	DMSO	-1.60773	3.19656	0.941552	Amp	1.7259	-0.489813	0.649915	0.960654	Not_Sig		0.439611
K562_RS04685	K562_RS04685	CP053300	992648	993673	No_name	hypothetical protein	0	0	-0.25351	2.32246	0.187574	DMSO	-0.090063	2.26352	0.326278	Amp	3.02574	-0.752216	0.493764	0.930894	Not_Sig		0.163447
K562_RS04690	K562_RS04690	CP053300	993817	994881	No_name	LacI family DNA-binding transcriptional regulator	Bacterial regulatory proteins, lacI family	0	-0.226269	2.32246	1.88156	DMSO	-3.461	2.26352	0.824501	Amp	5.20778	2.72734	0.0525872	0.598078	Not_Sig		-3.23473
K562_RS04695	K562_RS04695	CP053300	995056	996138	No_name	fatty acid desaturase family protein	fatty acid desaturase	0	0.790281	0.46364	0.631817	DMSO	0.171225	1.12661	0.42968	Amp	2.16218	1.40331	0.233187	0.80679	Not_Sig		-0.619056
K562_RS04700	K562_RS04700	CP053300	996175	996483	No_name	non-heme iron oxygenase ferredoxin subunit	TIGRFAM Rieske 2Fe-2S domain protein, MocE subfamily	0	1.74459	0.0419771	0.384922	DMSO	1.30644	0.0348098	0.08068	Amp	22.7622	1.92962	0.12587	0.701791	Not_Sig		-0.438148
K562_RS04705	K562_RS04705	CP053300	996488	997738	No_name	FAD-dependent oxidoreductase	PFAM FAD-dependent pyridine nucleotide-disulphide oxidoreductase	0	0.0392123	1.86108	0.487784	DMSO	-0.727114	2.38549	0.153698	Amp	10.0721	2.59533	0.0603442	0.609152	Not_Sig		-0.766327
K562_RS04710	K562_RS04710	CP053300	997799	998515	No_name	aquaporin family protein	Belongs to the MIP aquaporin (TC 1.A.8) family	glpF	0.505711	1.49037	0.0373492	DMSO	0.30923	1.80549	0.687177	Amp	338.512	NA	NA	NA	Not_tested		-0.19648
K562_RS04715	K562_RS04715	CP053300	998597	1000099	No_name	glycerol kinase GlpK	Key enzyme in the regulation of glycerol uptake and metabolism. Catalyzes the phosphorylation of glycerol to yield sn- glycerol 3-phosphate	glpK	0.37332	1.14209	0.244317	DMSO	0.140649	1.5335	0.549038	Amp	5.05007	0.670609	0.539201	0.942121	Not_Sig		-0.232671
K562_RS04720	K562_RS04720	CP053300	1000204	1001727	No_name	glycerol-3-phosphate dehydrogenase	Belongs to the FAD-dependent glycerol-3-phosphate dehydrogenase family	glpD	-0.993189	1.98532	0.246872	DMSO	-1.17107	1.91875	0.256307	Amp	1.07789	0.865772	0.435455	0.917974	Not_Sig		-0.17788
K562_RS04725	K562_RS04725	CP053300	1001890	1002258	No_name	hypothetical protein	0	0	1.21093	0.505455	1.28048	DMSO	0.268969	0.381449	0.704485	Amp	3.30372	1.11634	0.326807	0.871387	Not_Sig		-0.941958
K562_RS04730	K562_RS04730	CP053300	1002353	1002550	No_name	hypothetical protein	0	0	0.386997	1.09504	0.505056	DMSO	0.110338	1.5808	0.138363	Amp	13.3242	0.915062	0.411932	0.915507	Not_Sig		-0.276659
K562_RS04735	K562_RS04735	CP053300	1002851	1003630	No_name	DeoR/GlpR transcriptional regulator	PFAM regulatory protein DeoR	glpR	0.5505	0.503164	0.434373	DMSO	-0.322239	1.55541	0.318923	Amp	1.85504	2.80513	0.0485571	0.579426	Sig		-0.872739
K562_RS04740	K562_RS04740	CP053300	1003843	1005483	No_name	gamma-glutamyltransferase family protein	gamma-glutamyltransferase	0	-0.200059	1.31178	0.134935	DMSO	-0.357742	1.81008	0.234642	Amp	3.02386	1.00901	0.370049	0.891107	Not_Sig		-0.157683
K562_RS04745	K562_RS04745	CP053300	1005811	1006638	No_name	ferritin-like domain-containing protein	catalase activity	0	0.166783	1.34398	0.255137	DMSO	0.615842	0.563684	0.296854	Amp	1.35376	-1.98705	0.117847	0.694861	Not_Sig		0.449059
K562_RS04750	K562_RS04750	CP053300	1006709	1007215	No_name	hypothetical protein	0	0	-0.0295681	0.603961	0.463954	DMSO	0.492166	0.453079	0.729704	Amp	2.47368	-1.04506	0.35499	0.886667	Not_Sig		0.521734
K562_RS04755	K562_RS04755	CP053300	1007209	1008642	No_name	DEAD/DEAH box helicase	DEAD-box RNA helicase involved in ribosome assembly. Has RNA-dependent ATPase activity and unwinds double-stranded RNA	rhlE	0.0687861	0.960919	0.0593889	DMSO	0.21822	1.34102	0.483458	Amp	66.2686	NA	NA	NA	Not_tested		0.149434
K562_RS04760	K562_RS04760	CP053300	1008780	1010078	No_name	cytochrome c	PFAM cytochrome c, class I	0	-0.822406	1.70367	0.630221	DMSO	-0.924185	1.34208	0.5943	Amp	1.12454	0.203508	0.848672	0.981647	Not_Sig		-0.101779
K562_RS04765	K562_RS04765	CP053300	1010098	1010862	No_name	c-type cytochrome	PFAM cytochrome c, class I	0	-0.92526	1.98422	0.499997	DMSO	-1.10076	2.48567	0.528741	Amp	1.11828	0.417704	0.697611	0.963803	Not_Sig		-0.175496
K562_RS04770	K562_RS04770	CP053300	1011238	1012170	No_name	CopD family protein	PFAM copper resistance D domain protein	0	-0.067432	1.37813	0.0762065	DMSO	0.295068	0.691808	0.284901	Amp	13.9767	-2.12896	0.100325	0.680788	Not_Sig		0.3625
K562_RS04775	K562_RS04775	CP053300	1012335	1013483	No_name	galactonate dehydratase	mandelate racemase muconate lactonizing	dgoD	-0.0723107	1.06791	0.347736	DMSO	-0.0993224	1.33355	0.255529	Amp	1.85191	0.108419	0.918884	0.98913	Not_Sig		-0.0270117
K562_RS04780	K562_RS04780	CP053300	1013622	1014305	No_name	FadR family transcriptional regulator	PFAM regulatory protein GntR HTH	0	0.00624204	1.2262	0.485043	DMSO	0.267823	0.624873	0.590038	Amp	1.47979	-0.593171	0.58498	0.948571	Not_Sig		0.261581
K562_RS04790	K562_RS04790	CP053300	1014734	1015081	No_name	GFA family protein	PFAM glutathione-dependent formaldehyde-activating GFA	0	-0.647571	0.915234	0.357019	DMSO	0.277145	1.80163	0.20497	Amp	3.0339	-3.89059	0.0176818	0.43033	Sig		0.924716
K562_RS04795	K562_RS04795	CP053300	1015121	1018228	No_name	transglycosylase domain-containing protein	PFAM glycosyl transferase, family 51	0	0.0324219	1.6517	0.277189	DMSO	0.000103975	1.69595	0.137785	Amp	4.04718	0.180834	0.865291	0.981699	Not_Sig		-0.0323179
K562_RS04800	K562_RS04800	CP053300	1018475	1019362	No_name	LysR family transcriptional regulator	Transcriptional regulator, LysR family	0	0.562358	1.07925	0.290781	DMSO	0.795013	0.963591	0.542099	Amp	3.47555	-0.655061	0.548188	0.943245	Not_Sig		0.232654
K562_RS04805	K562_RS04805	CP053300	1019947	1020231	No_name	PAAR domain-containing protein	PAAR motif	0	0.480665	1.02633	0.29744	DMSO	0.184657	1.61743	0.276374	Amp	1.15826	1.26275	0.275277	0.836015	Not_Sig		-0.296008
K562_RS04810	K562_RS04810	CP053300	1020269	1020580	No_name	cupin domain protein	PFAM Cupin 2, conserved barrel domain protein	0	-0.158437	1.24136	0.235533	DMSO	-0.211382	2.22878	0.198709	Amp	1.40498	0.29759	0.780832	0.972764	Not_Sig		-0.0529456
K562_RS04815	K562_RS04815	CP053300	1020640	1021323	No_name	DJ-1/PfpI family protein	PFAM ThiJ PfpI domain protein	0	-0.875718	2.29896	0.29498	DMSO	-0.33293	1.07066	0.670248	Amp	5.16281	-1.28384	0.268521	0.83512	Not_Sig		0.542789
K562_RS04820	K562_RS04820	CP053300	1021440	1022414	No_name	GlxA family transcriptional regulator	Transcriptional regulator	0	-0.930416	2.16294	0.460098	DMSO	-1.18491	2.2846	0.841817	Amp	3.34761	0.459485	0.669749	0.962274	Not_Sig		-0.254499
K562_RS04825	K562_RS04825	CP053300	1022579	1023553	No_name	LysR family transcriptional regulator	LysR substrate binding domain	0	-0.39477	1.95989	0.347689	DMSO	-0.616116	2.03043	0.280184	Amp	1.53991	0.85858	0.438977	0.918354	Not_Sig		-0.221346
K562_RS04830	K562_RS04830	CP053300	1023871	1024011	No_name	hypothetical protein	#N/A	#N/A	0.618331	1.32988	1.10035	DMSO	0.0688964	2.27738	0.779704	Amp	1.99158	0.705661	0.519327	0.940165	Not_Sig		-0.549434
K562_RS04835	K562_RS04835	CP053300	1025039	1026136	No_name	plasmid recombination protein	plasmid recombination	0	-0.322295	2.12198	0.567688	DMSO	-0.0626406	2.22547	0.534829	Amp	1.12665	-0.576625	0.595087	0.950848	Not_Sig		0.259655
K562_RS04840	K562_RS04840	CP053300	1026411	1027781	No_name	tyrosine-type recombinase/integrase	#N/A	#N/A	-0.150795	1.71914	0.180174	DMSO	-0.175764	1.64114	0.134896	Amp	1.78396	0.192148	0.856987	0.981647	Not_Sig		-0.0249693
K562_RS04850	K562_RS04850	CP053300	1028097	1029755	No_name	MHS family MFS transporter	Major Facilitator	0	0.0908255	1.38395	0.248861	DMSO	0.0600629	1.13276	0.284718	Amp	1.30893	0.140904	0.894757	0.984911	Not_Sig		-0.0307626
K562_RS04855	K562_RS04855	CP053300	1029983	1031530	No_name	sensor histidine kinase	Histidine kinase	0	0.183591	1.57934	0.266042	DMSO	-0.297334	1.8727	0.112692	Amp	5.57337	2.88305	0.0448753	0.564665	Sig		-0.480925
K562_RS04860	K562_RS04860	CP053300	1031548	1032276	No_name	response regulator transcription factor	response regulator	0	0.101772	1.40486	0.0427901	DMSO	0.142153	1.13661	0.292791	Amp	46.8197	NA	NA	NA	Not_tested		0.0403813
K562_RS04865	K562_RS04865	CP053300	1032275	1032493	No_name	hypothetical protein	#N/A	#N/A	1.36095	0.0548849	0.356368	DMSO	1.26717	0.0267589	0.0731806	Amp	23.714	0.446447	0.678378	0.963653	Not_Sig		-0.0937728
K562_RS04870	K562_RS04870	CP053300	1032463	1033533	No_name	recombinase RecA	Can catalyze the hydrolysis of ATP in the presence of single-stranded DNA, the ATP-dependent uptake of single-stranded DNA by duplex DNA, and the ATP-dependent hybridization of homologous single-stranded DNAs. It interacts with LexA causing its activation and leading to its autocatalytic cleavage	recA	-1.27673	0.659173	1.3654	DMSO	-6.14188	0.137631	0.413727	Amp	10.8916	5.9064	0.00411255	0.261509	Sig		-4.86515
K562_RS04875	K562_RS04875	CP053300	1033533	1034396	No_name	recombination regulator RecX	Modulates RecA activity	recX	0.708297	0.659173	0.48725	DMSO	0.533005	0.137631	0.752555	Amp	2.38546	0.33866	0.751897	0.969417	Not_Sig		-0.175293
K562_RS04880	K562_RS04880	CP053300	1034534	1035142	No_name	DUF2889 domain-containing protein	Protein of unknown function (DUF2889)	0	0.875732	1.2348	0.868627	DMSO	1.12844	1.23571	0.911136	Amp	1.10027	-0.347709	0.745585	0.967973	Not_Sig		0.252712
K562_RS04885	K562_RS04885	CP053300	1035211	1036377	No_name	ADP-forming succinate--CoA ligase subunit beta	Succinyl-CoA synthetase functions in the citric acid cycle (TCA), coupling the hydrolysis of succinyl-CoA to the synthesis of either ATP or GTP and thus represents the only step of substrate-level phosphorylation in the TCA. The beta subunit provides nucleotide specificity of the enzyme and binds the substrate succinate, while the binding sites for coenzyme A and phosphate are found in the alpha …	sucC	-0.276362	1.97903	0.19049	DMSO	-0.607826	2.19383	0.184288	Amp	1.06843	2.1661	0.0962291	0.674479	Not_Sig		-0.331464
K562_RS04890	K562_RS04890	CP053300	1036442	1037323	No_name	succinate--CoA ligase subunit alpha	Succinyl-CoA synthetase functions in the citric acid cycle (TCA), coupling the hydrolysis of succinyl-CoA to the synthesis of either ATP or GTP and thus represents the only step of substrate-level phosphorylation in the TCA. The alpha subunit of the enzyme binds the substrates coenzyme A and phosphate, while succinate binding and nucleotide specificity is provided by the beta subunit	sucD	-0.823074	1.5586	0.138438	DMSO	-0.668808	1.62977	0.201987	Amp	2.12879	-1.09116	0.336526	0.881335	Not_Sig		0.154266
K562_RS04895	K562_RS04895	CP053300	1037481	1038185	No_name	TerC family protein	Integral membrane protein TerC	0	0.177671	0.538622	0.118652	DMSO	0.359323	0.725862	0.106554	Amp	1.23999	-1.97292	0.119768	0.696466	Not_Sig		0.181652
K562_RS04900	K562_RS04900	CP053300	1038283	1038879	No_name	pilin	general secretion pathway protein	pilA	1.10102	0.110604	0.198408	DMSO	0.903327	0.265648	0.172682	Amp	1.32015	1.30183	0.262884	0.830726	Not_Sig		-0.197696
K562_RS04905	K562_RS04905	CP053300	1039035	1040813	No_name	O-antigen ligase C-terminal domain-containing protein	Pfam O-Antigen Polymerase	0	0.403285	1.32911	0.479979	DMSO	0.514769	1.00168	0.446041	Amp	1.15797	-0.294698	0.782886	0.972764	Not_Sig		0.111484
K562_RS04910	K562_RS04910	CP053300	1041265	1041615	No_name	TonB family protein	Gram-negative bacterial TonB protein C-terminal	0	-0.259044	1.81695	0.202069	DMSO	0.850346	0.217576	0.572428	Amp	8.02495	-3.16536	0.0340088	0.512261	Sig		1.10939
K562_RS04915	K562_RS04915	CP053300	1041965	1042453	No_name	cyclic pyranopterin monophosphate synthase MoaC	Catalyzes the conversion of (8S)-3',8-cyclo-7,8- dihydroguanosine 5'-triphosphate to cyclic pyranopterin monophosphate (cPMP)	moaC	0.43718	1.01678	0.581373	DMSO	0.591474	0.671634	0.28802	Amp	4.07441	-0.411904	0.701526	0.963899	Not_Sig		0.154295
K562_RS04920	K562_RS04920	CP053300	1042723	1044417	No_name	M48 family metallopeptidase	Peptidase M48	0	-1.4529	2.18351	0.515015	DMSO	-1.46361	2.43767	0.620391	Amp	1.45108	0.0229975	0.982754	0.997585	Not_Sig		-0.0107058
K562_RS04925	K562_RS04925	CP053300	1044457	1045044	No_name	DUF2946 family protein	Protein of unknown function (DUF2946)	0	0.997526	0.095449	0.496701	DMSO	0.523946	0.640496	0.591833	Amp	1.41974	1.06163	0.348248	0.886021	Not_Sig		-0.47358
K562_RS04930	K562_RS04930	CP053300	1045037	1046074	No_name	hydrolase	Alpha beta hydrolase	0	0.388813	1.46256	0.27165	DMSO	0.190348	1.62967	0.103141	Amp	6.93679	1.18302	0.302312	0.851367	Not_Sig		-0.198465
K562_RS04935	K562_RS04935	CP053300	1046108	1046554	No_name	nuclear transport factor 2 family protein	SnoaL-like domain	0	-0.630214	2.18849	0.744589	DMSO	-0.570446	1.78265	0.311529	Amp	5.71264	-0.12826	0.904133	0.984911	Not_Sig		0.0597688
K562_RS04940	K562_RS04940	CP053300	1046670	1047707	No_name	lipopolysaccharide heptosyltransferase II	heptosyltransferase II	rfaF	-3.15448	5.98515	0.392668	DMSO	-4.52466	0.709233	1.30221	Amp	10.998	1.74485	0.155951	0.734914	Not_Sig		-1.37018
K562_RS04945	K562_RS04945	CP053300	1047847	1048041	No_name	zinc-finger domain-containing protein	Zinc-finger domain	0	-0.287094	4.14665	0.0839427	DMSO	1.02738	0.420153	0.314374	Amp	14.0258	-6.99697	0.0021957	0.211605	Sig		1.31447
K562_RS04950	K562_RS04950	CP053300	1048092	1049015	No_name	branched-chain amino acid transaminase	Belongs to the class-IV pyridoxal-phosphate-dependent aminotransferase family	ilvE	0.00314482	1.20692	0.178519	DMSO	-0.0919645	1.28932	0.226883	Amp	1.61523	0.570617	0.598785	0.951684	Not_Sig		-0.0951094
K562_RS04955	K562_RS04955	CP053300	1049223	1049978	No_name	AzlC family ABC transporter permease	PFAM AzlC family protein	0	0.476588	0.581598	0.163805	DMSO	0.568185	0.705762	0.079745	Amp	4.21939	-0.870823	0.432995	0.915703	Not_Sig		0.0915971
K562_RS04960	K562_RS04960	CP053300	1049975	1050298	No_name	AzlD domain-containing protein	Pfam Branched-chain amino acid transport	0	-0.850122	2.61272	0.11008	DMSO	-0.129173	0.723985	0.387495	Amp	12.3914	-3.09989	0.036225	0.524894	Sig		0.720949
K562_RS04965	K562_RS04965	CP053300	1050579	1051775	No_name	phosphoglycerate kinase	Belongs to the phosphoglycerate kinase family	pgk	-0.659149	0.333116	1.36913	DMSO	1.17508	2.47e-32	1.92e-16	Amp	5.09e+31	NA	NA	NA	Not_tested		1.83423
K562_RS04970	K562_RS04970	CP053300	1052061	1053497	No_name	pyruvate kinase	Belongs to the pyruvate kinase family	pykA	-0.718172	1.91932	0.599116	DMSO	-0.807882	2.26576	0.241423	Amp	6.15835	0.240555	0.821726	0.977153	Not_Sig		-0.0897097
K562_RS04975	K562_RS04975	CP053300	1053816	1054880	No_name	fructose-bisphosphate aldolase class II	fructose-bisphosphate aldolase, class II, Calvin cycle subtype	fbaA	-1.94508	1.50648	0.691349	DMSO	-1.41501	0.900232	1.08716	Amp	2.4728	-0.712616	0.515447	0.938769	Not_Sig		0.530068
K562_RS04980	K562_RS04980	CP053300	1055115	1056005	No_name	phosphoribosylaminoimidazolesuccinocarboxamide synthase	phosphoribosylaminoimidazolesuccinocarboxamide synthase	purC	-4.09789	0.358217	1.0064	DMSO	-3.12176	1.23354	0.790632	Amp	1.62029	-1.32105	0.256988	0.827997	Not_Sig		0.976131
K562_RS04985	K562_RS04985	CP053300	1056022	1056543	No_name	5-(carboxyamino)imidazole ribonucleotide mutase	Catalyzes the conversion of N5-carboxyaminoimidazole ribonucleotide (N5-CAIR) to 4-carboxy-5-aminoimidazole ribonucleotide (CAIR)	purE	0.895296	0.358217	1.19862	DMSO	-0.132201	1.23354	3.19501	Amp	7.10522	0.521526	0.629544	0.958589	Not_Sig		-1.0275
K562_RS04990	K562_RS04990	CP053300	1056634	1057830	No_name	5-(carboxyamino)imidazole ribonucleotide synthase	Catalyzes the ATP-dependent conversion of 5- aminoimidazole ribonucleotide (AIR) and HCO(3)(-) to N5- carboxyaminoimidazole ribonucleotide (N5-CAIR)	purK	-0.59903	0.358217	3.26845	DMSO	-0.550583	1.23354	5.45075	Amp	2.78119	-0.0132029	0.990098	0.998402	Not_Sig		0.0484469
K562_RS05000	K562_RS05000	CP053300	1058961	1060097	No_name	SGNH/GDSL hydrolase family protein	GDSL-like Lipase/Acylhydrolase	0	-0.234027	1.96957	0.180832	DMSO	-0.235981	1.84501	0.108954	Amp	2.7546	0.0160336	0.987975	0.997922	Not_Sig		-0.00195432
K562_RS05005	K562_RS05005	CP053300	1060193	1061107	No_name	sterol desaturase family protein	Fatty acid hydroxylase	0	0.58097	0.946015	0.182562	DMSO	0.821228	0.485591	0.163829	Amp	1.24176	-1.6965	0.165031	0.746608	Not_Sig		0.240259
K562_RS05010	K562_RS05010	CP053300	1061439	1062971	No_name	D-alanyl-D-alanine carboxypeptidase/D-alanyl-D-alanine-endopeptidase	D-alanyl-d-alanine carboxypeptidase	dacB	-1.14472	2.3435	0.565691	DMSO	-0.602337	1.80281	0.129752	Amp	19.0077	-1.61864	0.180836	0.763216	Not_Sig		0.54238
K562_RS05015	K562_RS05015	CP053300	1063159	1063821	No_name	response regulator	response regulator	0	1.31999	2.3435	0.173631	DMSO	1.38424	1.80281	0.195693	Amp	1.27027	-0.425349	0.692468	0.963653	Not_Sig		0.0642467
K562_RS05020	K562_RS05020	CP053300	1063825	1065171	No_name	two-component sensor histidine kinase	PhoQ Sensor	0	1.44965	0.315349	0.390714	DMSO	0.527335	2.3352	2.43912	Amp	38.9717	0.646702	0.553062	0.943753	Not_Sig		-0.922314
K562_RS05025	K562_RS05025	CP053300	1065273	1066757	No_name	DegQ family serine endoprotease	Belongs to the peptidase S1C family	degP	-0.104613	1.58604	0.173855	DMSO	-0.0568981	1.64648	0.583177	Amp	11.252	-0.135809	0.898533	0.984911	Not_Sig		0.0477151
K562_RS05030	K562_RS05030	CP053300	1066866	1067303	No_name	carboxypeptidase regulatory-like domain-containing protein	0	0	0.910746	0.19264	0.365231	DMSO	0.971594	0.0721597	0.126519	Amp	8.33349	-0.272667	0.798607	0.974972	Not_Sig		0.0608482
K562_RS05035	K562_RS05035	CP053300	1067433	1067792	No_name	DUF427 domain-containing protein	Domain of unknown function (DUF427)	0	1.01177	0.0578993	0.276627	DMSO	1.0853	0.0171461	0.24238	Amp	1.30256	-0.346316	0.746555	0.967973	Not_Sig		0.0735382
K562_RS05040	K562_RS05040	CP053300	1067821	1068528	No_name	carbon monoxide dehydrogenase subunit G	PFAM carbon monoxide dehydrogenase subunit G	0	0.409344	0.0191326	0.252013	DMSO	1.1928	0.0497412	0.27718	Amp	1.2097	-3.62231	0.0223114	0.461362	Sig		0.783457
K562_RS05045	K562_RS05045	CP053300	1068580	1069587	No_name	helix-turn-helix domain-containing protein	helix-turn-helix- domain containing protein, AraC type	0	-0.257118	1.42798	0.682951	DMSO	0.0394678	1.51294	0.401742	Amp	2.88991	-0.648326	0.552112	0.943753	Not_Sig		0.296586
K562_RS05050	K562_RS05050	CP053300	1069740	1070417	No_name	cysteine hydrolase	PFAM isochorismatase hydrolase	0	1.55753	0.0303556	0.248353	DMSO	0.874873	0.162103	0.373876	Amp	2.2663	2.6343	0.0579248	0.604892	Not_Sig		-0.682656
K562_RS05055	K562_RS05055	CP053300	1070455	1071096	No_name	TetR family transcriptional regulator	Transcriptional regulator	bpeR	0.576332	1.7937	0.818181	DMSO	0.636977	0.546261	1.00584	Amp	1.51133	-0.081014	0.939322	0.993944	Not_Sig		0.0606458
K562_RS05060	K562_RS05060	CP053300	1071497	1072771	No_name	efflux RND transporter periplasmic adaptor subunit	Belongs to the membrane fusion protein (MFP) (TC 8.A.1) family	bpeA	-0.854656	1.89878	0.712837	DMSO	0.271455	0.827574	0.341346	Amp	4.36104	-0.165766	0.122446	0.419891	Not_Sig		1.12611
K562_RS05065	K562_RS05065	CP053300	1072787	1075987	No_name	efflux RND transporter permease BpeB	Efflux pump membrane transporter	bpeB	-1.30648	1.18616	0.377966	DMSO	-0.507631	1.61697	0.230449	Amp	2.69001	-0.950918	0.394988	0.610156	Not_Sig		0.798848
K562_RS05070	K562_RS05070	CP053300	1075987	1077510	No_name	efflux transporter outer membrane subunit	RND efflux system, outer membrane lipoprotein, NodT family	oprB	-4.1219	1.18616	0.642386	DMSO	-4.37552	1.61697	0.563936	Amp	1.29757	0.513902	0.634407	0.959237	Not_Sig		-0.25362
K562_RS05075	K562_RS05075	CP053300	1077885	1079261	No_name	purine permease	permease	0	0.304646	1.81689	0.433416	DMSO	0.356635	1.70059	0.78416	Amp	3.2734	-0.100503	0.924781	0.989739	Not_Sig		0.0519889
K562_RS05080	K562_RS05080	CP053300	1079703	1081169	No_name	carbohydrate kinase	Carbohydrate kinase	0	0.654366	0.616484	0.40917	DMSO	0.836823	0.262855	0.328056	Amp	1.55565	-0.60259	0.579276	0.948571	Not_Sig		0.182457
K562_RS05085	K562_RS05085	CP053300	1081384	1082490	No_name	S-(hydroxymethyl)glutathione dehydrogenase/classIII alcohol dehydrogenase	Belongs to the zinc-containing alcohol dehydrogenase family. Class-III subfamily	adhC	0.0298687	1.4476	0.110881	DMSO	0.275688	1.1771	0.223777	Amp	4.07302	-1.70485	0.163424	0.744599	Not_Sig		0.245819
K562_RS05090	K562_RS05090	CP053300	1082507	1083355	No_name	S-formylglutathione hydrolase	Serine hydrolase involved in the detoxification of formaldehyde	fghA	0.492599	0.845057	0.0326802	DMSO	-0.0812811	1.7823	0.214562	Amp	43.1056	NA	NA	NA	Not_tested		-0.57388
K562_RS05095	K562_RS05095	CP053300	1083489	1084271	No_name	metal ABC transporter permease	PFAM ABC-3 protein	0	-0.287494	0.771666	0.278445	DMSO	0.414619	0.473356	0.521203	Amp	3.50377	-2.05798	0.108702	0.683949	Not_Sig		0.702113
K562_RS05100	K562_RS05100	CP053300	1084264	1085148	No_name	ABC transporter ATP-binding protein	abc transporter	0	0.873829	0.0701644	0.156887	DMSO	1.03678	0.0031383	0.0241345	Amp	42.2567	NA	NA	NA	Not_tested		0.162956
K562_RS05105	K562_RS05105	CP053300	1085166	1086077	No_name	metal ABC transporter solute-binding protein	Belongs to the bacterial solute-binding protein 9 family	0	0.022087	2.1509	0.460868	DMSO	0.132776	1.5672	0.560692	Amp	1.48012	-0.264151	0.804715	0.975481	Not_Sig		0.110689
K562_RS05110	K562_RS05110	CP053300	1086122	1086583	No_name	transcriptional repressor	Belongs to the Fur family	0	0.262247	0.574124	0.817944	DMSO	0.192703	1.38944	0.268293	Amp	9.29454	0.139929	0.895479	0.984911	Not_Sig		-0.0695439
K562_RS05115	K562_RS05115	CP053300	1086912	1087688	No_name	L-iditol 2-dehydrogenase	PFAM short-chain dehydrogenase reductase SDR	polS	1.3458	0.574124	0.666067	DMSO	1.5541	1.38944	0.644178	Amp	1.06911	-0.38936	0.71685	0.965921	Not_Sig		0.2083
K562_RS05120	K562_RS05120	CP053300	1087767	1088723	No_name	sugar kinase	pfkB family carbohydrate kinase	scrK	-0.331286	2.58973	0.111244	DMSO	-0.273926	2.72967	0.321498	Amp	8.35232	-0.292034	0.784781	0.972764	Not_Sig		0.0573597
K562_RS05125	K562_RS05125	CP053300	1088711	1090063	No_name	D-tagatose-bisphosphate aldolase	D-tagatose-bisphosphate aldolase, class II	0	1.30278	0.0510686	0.176732	DMSO	1.05142	0.0956483	0.237259	Amp	1.80224	1.47158	0.215105	0.786999	Not_Sig		-0.251357
K562_RS05130	K562_RS05130	CP053300	1090136	1091461	No_name	sugar ABC transporter substrate-binding protein	PFAM extracellular solute-binding protein family 1	0	1.1385	0.202961	0.442564	DMSO	0.535583	0.0263982	0.591348	Amp	1.78539	1.41384	0.230302	0.804332	Not_Sig		-0.602918
K562_RS05135	K562_RS05135	CP053300	1091575	1092528	No_name	sugar ABC transporter permease	PFAM binding-protein-dependent transport systems inner membrane component	0	0.492288	0.299691	0.178489	DMSO	0.899204	0.766273	0.835287	Amp	21.9003	-0.82515	0.455653	0.922405	Not_Sig		0.406915
K562_RS05140	K562_RS05140	CP053300	1092525	1093376	No_name	carbohydrate ABC transporter permease	PFAM binding-protein-dependent transport systems inner membrane component	0	0.506808	1.09893	0.606089	DMSO	0.966889	0.110676	0.269159	Amp	5.07056	-1.20163	0.295784	0.846189	Not_Sig		0.46008
K562_RS05145	K562_RS05145	CP053300	1093373	1094071	No_name	HAD family phosphatase	TIGRFAM HAD-superfamily hydrolase, subfamily IA, variant 3	0	0.0818331	1.09893	1.08837	DMSO	1.5019	0.110676	0.42251	Amp	6.63555	-2.10675	0.102867	0.68181	Not_Sig		1.42007
K562_RS05150	K562_RS05150	CP053300	1094127	1095236	No_name	sn-glycerol-3-phosphate ABC transporter ATP-binding protein UgpC	Belongs to the ABC transporter superfamily	0	1.43458	0.141749	0.503354	DMSO	1.12506	0.314114	0.276138	Amp	3.32274	0.93379	0.403275	0.910762	Not_Sig		-0.309523
K562_RS05155	K562_RS05155	CP053300	1095251	1096135	No_name	LysR family transcriptional regulator	Transcriptional regulator	0	0.740786	0.359492	0.252846	DMSO	0.651253	0.560117	0.293597	Amp	1.34832	0.400234	0.709438	0.965336	Not_Sig		-0.0895338
K562_RS05160	K562_RS05160	CP053300	1096249	1097445	No_name	serine hydrolase	beta-lactamase	0	0.615116	0.0678972	0.265971	DMSO	1.00391	0.135381	0.682657	Amp	6.58775	-0.919162	0.410023	0.914358	Not_Sig		0.388796
K562_RS05165	K562_RS05165	CP053300	1097442	1098665	No_name	MFS transporter	Major facilitator Superfamily	0	0.0816503	1.94208	0.592099	DMSO	1.42464	0.5168	1.09646	Amp	3.42922	-1.8667	0.135347	0.709641	Not_Sig		1.34299
K562_RS05170	K562_RS05170	CP053300	1098694	1099707	No_name	sugar-binding transcriptional regulator	#N/A	#N/A	0.194986	0.465448	0.192519	DMSO	0.230348	0.475068	0.396665	Amp	4.24521	-0.138912	0.896232	0.984911	Not_Sig		0.0353619
K562_RS05175	K562_RS05175	CP053300	1099771	1101252	No_name	xylulokinase	xylulose kinase	xylB	0.13432	1.2653	0.120203	DMSO	0.14073	1.35488	0.120258	Amp	1.00091	-0.0652934	0.951073	0.995107	Not_Sig		0.00640969
K562_RS05180	K562_RS05180	CP053300	1101357	1102751	No_name	mannitol dehydrogenase family protein	Mannitol dehydrogenase rossman	dalD	0.855228	0.490557	0.193646	DMSO	1.09112	0.34758	0.0898945	Amp	4.64035	-1.9138	0.128184	0.703306	Not_Sig		0.235897
K562_RS05185	K562_RS05185	CP053300	1102924	1103835	No_name	LysR family transcriptional regulator	Transcriptional regulator	0	0.148495	2.12021	0.490506	DMSO	-0.0773163	1.95945	0.458818	Amp	1.1429	0.582324	0.591594	0.948699	Not_Sig		-0.225811
K562_RS05190	K562_RS05190	CP053300	1103935	1105539	No_name	benzoylformate decarboxylase	Belongs to the TPP enzyme family	mdlC	0.875368	0.306446	0.0154267	DMSO	0.763073	0.171789	0.126303	Amp	67.0317	NA	NA	NA	Not_tested		-0.112295
K562_RS05195	K562_RS05195	CP053300	1105569	1107020	No_name	aldehyde dehydrogenase	belongs to the aldehyde dehydrogenase family	0	0.751259	0.258653	0.382908	DMSO	0.457906	0.267948	0.164009	Amp	5.45069	1.21978	0.28955	0.844936	Not_Sig		-0.293354
K562_RS05200	K562_RS05200	CP053300	1107035	1107979	No_name	2-dehydropantoate 2-reductase	Catalyzes the NADPH-dependent reduction of ketopantoate into pantoic acid	0	1.18279	0.0379454	0.171819	DMSO	1.63408	0.187604	0.577227	Amp	11.2863	-1.2979	0.264105	0.832015	Not_Sig		0.451296
K562_RS05205	K562_RS05205	CP053300	1108237	1109643	No_name	MFS transporter	Sugar (and other) transporter	0	0.474388	0.819919	0.328324	DMSO	0.47605	0.858345	0.291671	Amp	1.26713	-0.00655605	0.995083	0.999138	Not_Sig		0.00166231
K562_RS05210	K562_RS05210	CP053300	1109664	1110599	No_name	tryptophan 2	Heme-dependent dioxygenase that catalyzes the oxidative cleavage of the L-tryptophan (L-Trp) pyrrole ring and converts L- tryptophan to N-formyl-L-kynurenine. Catalyzes the oxidative cleavage of the indole moiety	kynA	0.195391	2.30341	0.0970867	DMSO	0.558946	2.25146	1.56677	Amp	260.429	NA	NA	NA	Not_tested		0.363554
K562_RS05215	K562_RS05215	CP053300	1110690	1111940	No_name	kynureninase	#N/A	#N/A	-0.721657	1.95679	0.305579	DMSO	-0.558017	2.51758	0.26998	Amp	1.2811	-0.695102	0.525257	0.940778	Not_Sig		0.163641
K562_RS05220	K562_RS05220	CP053300	1111971	1112612	No_name	arylformamidase	Catalyzes the hydrolysis of N-formyl-L-kynurenine to L- kynurenine, the second step in the kynurenine pathway of tryptophan degradation	kynB	0.444386	1.27901	0.368249	DMSO	0.0282213	1.51577	0.447882	Amp	1.47926	1.24315	0.281701	0.842647	Not_Sig		-0.416165
K562_RS05225	K562_RS05225	CP053300	1112742	1113242	No_name	Lrp/AsnC family transcriptional regulator	PFAM regulatory protein AsnC Lrp family	0	-0.263729	1.03404	0.270982	DMSO	-1.34742	2.18045	0.544265	Amp	4.03405	3.08723	0.036673	0.525753	Sig		-1.08369
K562_RS05230	K562_RS05230	CP053300	1113229	1113738	No_name	flavin reductase family protein	PFAM flavin reductase domain protein, FMN-binding	0	0.572086	0.136474	0.0492053	DMSO	0.479754	0.339858	0.552738	Amp	126.187	NA	NA	NA	Not_tested		-0.0923318
K562_RS05235	K562_RS05235	CP053300	1114019	1114684	No_name	hypothetical protein	0	0	-1.21457	1.92407	0.52866	DMSO	-0.920846	1.88573	0.927286	Amp	3.07662	-0.476622	0.6585	0.960654	Not_Sig		0.293725
K562_RS05240	K562_RS05240	CP053300	1114681	1116087	No_name	selenium-binding family protein	Selenium-binding protein	0	0.346506	0.887744	0.141259	DMSO	0.743041	0.204915	0.170304	Amp	1.4535	-3.10408	0.0360782	0.524243	Sig		0.396535
K562_RS05245	K562_RS05245	CP053300	1116607	1117167	No_name	peptide-methionine (S)-S-oxide reductase MsrA	Has an important function as a repair enzyme for proteins that have been inactivated by oxidation. Catalyzes the reversible oxidation-reduction of methionine sulfoxide in proteins to methionine	msrA	-0.23073	1.73463	0.595511	DMSO	-0.0614305	1.49641	0.301372	Amp	3.90458	-0.439353	0.683098	0.963653	Not_Sig		0.1693
K562_RS05250	K562_RS05250	CP053300	1117190	1118484	No_name	DUF72 domain-containing protein	#N/A	#N/A	0.86724	0.214051	0.23685	DMSO	0.643933	0.536309	0.715352	Amp	9.12201	0.51328	0.634804	0.959237	Not_Sig		-0.223307
K562_RS05255	K562_RS05255	CP053300	1118508	1119728	No_name	class I SAM-dependent methyltransferase	cyclopropane-fatty-acyl-phospholipid synthase	cfa	-0.520217	1.87861	0.41013	DMSO	-1.39466	2.4363	0.164247	Amp	6.23515	3.42822	0.026579	0.484181	Sig		-0.87444
K562_RS05265	K562_RS05265	CP053300	1120623	1121480	No_name	tRNA cyclic N6-threonylcarbamoyladenosine(37) synthase TcdA	PFAM UBA THIF-type NAD FAD binding protein	0	0.194657	1.15415	0.379925	DMSO	0.627307	1.28854	0.348147	Amp	1.19089	-1.4542	0.219569	0.789861	Not_Sig		0.43265
K562_RS05270	K562_RS05270	CP053300	1121584	1122432	No_name	thioredoxin	Thioredoxin	0	-0.0323351	1.8796	0.623515	DMSO	0.38625	2.22702	1.30789	Amp	4.39998	-0.500382	0.643084	0.9605	Not_Sig		0.418585
K562_RS05275	K562_RS05275	CP053300	1122485	1123366	No_name	pirin family protein	Belongs to the pirin family	0	-0.293525	1.43608	0.592185	DMSO	0.226922	2.83286	0.108843	Amp	29.6014	-1.49715	0.208701	0.777461	Not_Sig		0.520448
K562_RS05280	K562_RS05280	CP053300	1123641	1124519	No_name	O-acetylserine/cysteine exporter	#N/A	#N/A	-0.213511	1.70474	0.536055	DMSO	-1.11213	2.1533	0.478059	Amp	1.25735	2.16699	0.0961336	0.674479	Not_Sig		-0.898621
K562_RS05295	K562_RS05295	CP053300	1126645	1127868	No_name	tRNA epoxyqueuosine(34) reductase QueG	Catalyzes the conversion of epoxyqueuosine (oQ) to queuosine (Q), which is a hypermodified base found in the wobble positions of tRNA(Asp), tRNA(Asn), tRNA(His) and tRNA(Tyr)	queG	-0.651564	1.50561	0.314437	DMSO	-0.238982	1.1785	0.16711	Amp	3.5405	-2.00686	0.115211	0.690765	Not_Sig		0.412582
K562_RS05300	K562_RS05300	CP053300	1127934	1128404	No_name	methylated-DNA--[protein]-cysteine S-methyltransferase	Methylated-DNA- protein -cysteine S-methyltransferase	ogt	-1.01887	2.02104	0.808194	DMSO	-1.19439	2.79096	0.154166	Amp	27.4825	0.369494	0.730489	0.96687	Not_Sig		-0.175519
K562_RS05305	K562_RS05305	CP053300	1128401	1129351	No_name	site-specific tyrosine recombinase XerD	Tyrosine recombinase XerD	xerD	-0.691619	0.661412	0.660119	DMSO	-0.092013	0.345472	0.736823	Amp	1.2459	-1.04981	0.353046	0.886667	Not_Sig		0.599607
K562_RS05310	K562_RS05310	CP053300	1129428	1130990	No_name	AMP-binding protein	amp-dependent synthetase and ligase	0	1.11995	0.387367	0.134369	DMSO	1.13992	0.274483	0.161969	Amp	1.453	-0.164393	0.877395	0.982574	Not_Sig		0.0199742
K562_RS05315	K562_RS05315	CP053300	1131227	1131718	No_name	Cys-tRNA(Pro) deacylase	Belongs to the prolyl-tRNA editing family. YbaK EbsC subfamily	ebsC	0.93951	0.335585	0.363378	DMSO	0.84872	0.339447	0.201271	Amp	3.25952	0.378558	0.724251	0.965921	Not_Sig		-0.0907891
K562_RS05325	K562_RS05325	CP053300	1132556	1133041	No_name	YajQ family cyclic di-GMP-binding protein	Belongs to the UPF0234 family	0	0.649252	1.11827	0.40593	DMSO	0.034255	2.65812	0.343514	Amp	1.39641	2.00313	0.115703	0.690799	Not_Sig		-0.614997
K562_RS05335	K562_RS05335	CP053300	1134314	1135243	No_name	ornithine carbamoyltransferase	Reversibly catalyzes the transfer of the carbamoyl group from carbamoyl phosphate (CP) to the N(epsilon) atom of ornithine (ORN) to produce L-citrulline	argF	-0.407374	1.95062	0.355381	DMSO	-0.471477	2.25837	0.483797	Amp	1.85326	0.184958	0.862261	0.981699	Not_Sig		-0.064103
K562_RS05355	K562_RS05355	CP053300	1138259	1139101	No_name	tetratricopeptide repeat protein	Transglutaminase-like superfamily	0	-0.653738	1.69346	0.562606	DMSO	-0.275816	1.34952	0.3223	Amp	3.04711	-1.00956	0.369818	0.891107	Not_Sig		0.377922
K562_RS05370	K562_RS05370	CP053300	1141147	1141341	No_name	Trm112 family protein	Belongs to the UPF0434 family	0	-2.32515	0.978295	1.00935	DMSO	-3.5545	0.640628	0.983652	Amp	1.05292	1.5108	0.205364	0.777461	Not_Sig		-1.22934
K562_RS05380	K562_RS05380	CP053300	1142800	1144182	No_name	exodeoxyribonuclease VII large subunit	Bidirectionally degrades single-stranded DNA into large acid-insoluble oligonucleotides, which are then degraded further into small acid-soluble oligonucleotides	xseA	-1.27694	1.31897	0.51227	DMSO	-1.13634	1.68759	0.473775	Amp	1.1691	-0.349016	0.744675	0.967973	Not_Sig		0.140604
K562_RS05390	K562_RS05390	CP053300	1145119	1146341	No_name	IS3-like element ISBcen7 family transposase	#N/A	#N/A	0.454832	0.622455	0.47383	DMSO	0.039542	0.273745	0.175338	Amp	7.30286	1.42371	0.227629	0.799406	Not_Sig		-0.41529
K562_RS05395	K562_RS05395	CP053300	1146412	1147623	No_name	chromate efflux transporter	TIGRFAM chromate transporter, chromate ion transporter (CHR) family	0	0.153422	0.358291	0.661299	DMSO	-0.438996	1.32133	0.414919	Amp	2.54021	1.31435	0.259029	0.828492	Not_Sig		-0.592418
K562_RS05400	K562_RS05400	CP053300	1147721	1148428	No_name	Crp/Fnr family transcriptional regulator	Transcriptional regulator, Crp Fnr family	0	0.730695	0.358291	0.455414	DMSO	0.244407	1.32133	0.793989	Amp	3.03961	0.920194	0.409544	0.914198	Not_Sig		-0.486289
K562_RS05405	K562_RS05405	CP053300	1148510	1149034	No_name	DUF962 domain-containing protein	Protein of unknown function (DUF962)	0	0.427075	1.37172	0.793116	DMSO	0.172185	1.87875	0.656311	Amp	1.46034	0.428851	0.690118	0.963653	Not_Sig		-0.25489
K562_RS05410	K562_RS05410	CP053300	1149027	1150082	No_name	2-dehydropantoate 2-reductase	Catalyzes the NADPH-dependent reduction of ketopantoate into pantoic acid	0	-0.0698217	1.89164	0.213818	DMSO	-0.00409868	2.256	0.265171	Amp	1.53803	-0.334183	0.755028	0.971069	Not_Sig		0.065723
K562_RS05415	K562_RS05415	CP053300	1150182	1150787	No_name	class I SAM-dependent methyltransferase	Tellurite resistance protein TehB	0	0.17831	1.40185	0.66299	DMSO	1.21981	0.127377	0.579534	Amp	1.30875	-2.04859	0.109867	0.683949	Not_Sig		1.0415
K562_RS05420	K562_RS05420	CP053300	1150807	1152081	No_name	EAL domain-containing protein	PFAM EAL domain protein	0	0.127181	1.69343	0.339566	DMSO	0.735421	1.10665	0.942881	Amp	7.71022	-1.05123	0.352466	0.886667	Not_Sig		0.60824
K562_RS05425	K562_RS05425	CP053300	1152249	1153685	No_name	multidrug transporter subunit MdtD	Major facilitator superfamily	0	0.226661	1.47983	0.488337	DMSO	0.135561	1.51511	0.193811	Amp	6.34866	0.300328	0.778889	0.972764	Not_Sig		-0.0910997
K562_RS05430	K562_RS05430	CP053300	1153940	1154263	No_name	DUF2917 domain-containing protein	Protein of unknown function (DUF2917)	0	1.29815	0.170329	0.549482	DMSO	0.677594	0.422367	0.0283198	Amp	376.466	NA	NA	NA	Not_tested		-0.620556
K562_RS05435	K562_RS05435	CP053300	1154236	1155468	No_name	helix-turn-helix domain-containing protein	citrate synthase	0	0.988857	1.35372	0.703625	DMSO	0.847984	1.67229	0.887548	Amp	1.59111	0.215429	0.839971	0.98107	Not_Sig		-0.140873
K562_RS05440	K562_RS05440	CP053300	1155615	1157006	No_name	CoA transferase	L-carnitine dehydratase bile acid-inducible protein F	0	-0.929063	1.16766	0.568828	DMSO	-1.64556	2.37683	1.2013	Amp	4.46008	0.933673	0.403329	0.910762	Not_Sig		-0.716497
K562_RS05445	K562_RS05445	CP053300	1157028	1157774	No_name	GntR family transcriptional regulator	Transcriptional regulator	0	0.233544	1.28941	0.22597	DMSO	0.544377	1.06447	0.301823	Amp	1.78404	-1.42791	0.226502	0.798768	Not_Sig		0.310833
K562_RS05450	K562_RS05450	CP053300	1157942	1158787	No_name	aldo/keto reductase	aldo keto reductase	0	0.388693	1.49057	0.157349	DMSO	0.348392	0.937233	0.598132	Amp	14.4499	0.112863	0.915577	0.988771	Not_Sig		-0.0403011
K562_RS05455	K562_RS05455	CP053300	1158848	1159321	No_name	hypothetical protein	#N/A	#N/A	-1.77209	3.33381	0.470398	DMSO	-1.59826	2.88197	0.269951	Amp	3.03641	-0.555158	0.608368	0.955832	Not_Sig		0.173835
K562_RS05460	K562_RS05460	CP053300	1160356	1161366	No_name	HoxN/HupN/NixA family nickel/cobalt transporter	#N/A	#N/A	-0.149942	1.66426	0.104221	DMSO	-0.129933	2.07545	0.169493	Amp	2.64479	-0.174178	0.870185	0.981699	Not_Sig		0.020009
K562_RS05465	K562_RS05465	CP053300	1161534	1163645	No_name	elongation factor G	Catalyzes the GTP-dependent ribosomal translocation step during translation elongation. During this step, the ribosome changes from the pre-translocational (PRE) to the post- translocational (POST) state as the newly formed A-site-bound peptidyl-tRNA and P-site-bound deacylated tRNA move to the P and E sites, respectively. Catalyzes the coordinated movement of the two tRNA molecules, the mRNA and…	fusA2	0.119851	1.86365	0.263867	DMSO	0.074331	1.77221	0.162399	Amp	2.64	0.254465	0.811683	0.976318	Not_Sig		-0.0455198
K562_RS05470	K562_RS05470	CP053300	1163885	1164385	No_name	DUF192 domain-containing protein	Uncharacterized ACR, COG1430	0	-3.18995	1.86365	0.873526	DMSO	-2.29978	1.77221	2.75296	Amp	9.93227	-0.53383	0.621745	0.955832	Not_Sig		0.890171
K562_RS05475	K562_RS05475	CP053300	1164546	1164761	No_name	hypothetical protein	#N/A	#N/A	-0.223677	0.964159	0.531145	DMSO	0.376336	0.800078	0.154404	Amp	11.8334	-1.87885	0.133458	0.706601	Not_Sig		0.600013
K562_RS05480	K562_RS05480	CP053300	1165043	1165621	No_name	pseudouridine synthase	Belongs to the pseudouridine synthase RsuA family	rluE	-2.32604	2.40922	0.802115	DMSO	-1.55619	2.00542	2.14629	Amp	7.15982	-0.581956	0.591818	0.948699	Not_Sig		0.769851
K562_RS05485	K562_RS05485	CP053300	1165899	1167155	No_name	NADP-dependent isocitrate dehydrogenase	Isocitrate dehydrogenase	icd	0.611002	0.728169	0.111313	DMSO	0.500272	0.678032	0.179366	Amp	2.59651	0.908535	0.414985	0.915703	Not_Sig		-0.11073
K562_RS05490	K562_RS05490	CP053300	1167438	1169666	No_name	NADP-dependent isocitrate dehydrogenase	PFAM Isocitrate dehydrogenase NADP-dependent monomeric type	0	-0.200827	1.08578	0.335475	DMSO	-0.193589	1.48371	0.275852	Amp	1.47901	-0.0288653	0.978355	0.997585	Not_Sig		0.0072382
K562_RS05500	K562_RS05500	CP053300	1170603	1172201	No_name	multicopper oxidase family protein	PFAM multicopper oxidase type	0	0.464838	1.0569	0.318928	DMSO	0.565005	1.02105	0.425878	Amp	1.78314	-0.326079	0.760711	0.971883	Not_Sig		0.100167
K562_RS05505	K562_RS05505	CP053300	1172383	1172586	No_name	cold-shock protein	Cold shock protein	cspD	-0.167721	1.63387	0.116907	DMSO	0.191614	1.6639	0.0777862	Amp	2.2588	-4.4323	0.0114017	0.382525	Sig		0.359335
K562_RS05510	K562_RS05510	CP053300	1172675	1172842	No_name	hypothetical protein	#N/A	#N/A	0.678889	0.650984	0.680525	DMSO	-0.0493274	2.42862	0.212702	Amp	10.2364	1.76904	0.151609	0.731708	Not_Sig		-0.728217
K562_RS05515	K562_RS05515	CP053300	1173132	1173446	No_name	ATP-dependent Clp protease adapter ClpS	Involved in the modulation of the specificity of the ClpAP-mediated ATP-dependent protein degradation	clpS	-0.767139	1.78631	0.239385	DMSO	-0.380317	1.76391	0.0765301	Amp	9.78432	-2.66589	0.0560451	0.603319	Not_Sig		0.386822
K562_RS05520	K562_RS05520	CP053300	1173443	1175743	No_name	ATP-dependent Clp protease ATP-binding subunit ClpA	Belongs to the ClpA ClpB family	clpA	-0.933463	2.77745	0.426189	DMSO	-0.896137	2.42203	0.440769	Amp	1.06959	-0.105444	0.921099	0.989174	Not_Sig		0.0373257
K562_RS05525	K562_RS05525	CP053300	1175847	1177226	No_name	amino acid permease	amino acid	0	-0.488526	1.81515	0.270022	DMSO	-0.480098	1.83772	0.729981	Amp	7.30842	-0.0187554	0.985935	0.997585	Not_Sig		0.00842799
K562_RS05530	K562_RS05530	CP053300	1177361	1178131	No_name	membrane protein	Repeat of Unknown Function (DUF347)	0	-0.27399	2.03651	0.200507	DMSO	-0.390612	2.41559	0.0682641	Amp	8.62725	0.95367	0.394255	0.905265	Not_Sig		-0.116622
K562_RS05535	K562_RS05535	CP053300	1178193	1178639	No_name	dUTP diphosphatase	This enzyme is involved in nucleotide metabolism it produces dUMP, the immediate precursor of thymidine nucleotides and it decreases the intracellular concentration of dUTP so that uracil cannot be incorporated into DNA	dut	0.439194	6.39e-05	0.0175402	DMSO	-3.49561	0.43058	1.08047	Amp	3794.51	NA	NA	NA	Not_tested		-3.9348
K562_RS05560	K562_RS05560	CP053300	1184535	1185197	No_name	phosphoribosylglycinamide formyltransferase	Catalyzes the transfer of a formyl group from 10- formyltetrahydrofolate to 5-phospho-ribosyl-glycinamide (GAR), producing 5-phospho-ribosyl-N-formylglycinamide (FGAR) and tetrahydrofolate	purN	0.945089	0.226619	0.702725	DMSO	0.144328	0.611615	1.38123	Amp	3.86331	0.894976	0.421387	0.915703	Not_Sig		-0.800761
K562_RS05565	K562_RS05565	CP053300	1185194	1186459	No_name	RsmB/NOP family class I SAM-dependent RNA methyltransferase	Belongs to the class I-like SAM-binding methyltransferase superfamily. RsmB NOP family	rsmB	0.264806	1.21572	0.0244521	DMSO	-0.00752568	1.13872	0.261594	Amp	114.452	NA	NA	NA	Not_tested		-0.272332
K562_RS05570	K562_RS05570	CP053300	1186478	1187860	No_name	mechanosensitive ion channel	mechanosensitive ion channel	mscS1	0.221487	1.39069	0.379737	DMSO	0.195185	1.19522	0.0945215	Amp	16.1401	0.116414	0.912935	0.988771	Not_Sig		-0.0263017
K562_RS05575	K562_RS05575	CP053300	1188076	1189272	No_name	fatty acid desaturase	fatty acid desaturase	0	-1.1584	1.81053	0.306115	DMSO	-1.38953	2.19062	0.116363	Amp	6.9205	1.22241	0.288654	0.844936	Not_Sig		-0.231126
K562_RS05580	K562_RS05580	CP053300	1189527	1190663	No_name	quinolinate synthase NadA	Catalyzes the condensation of iminoaspartate with dihydroxyacetone phosphate to form quinolinate	nadA	-0.452719	1.84885	0.414928	DMSO	-0.0185393	1.62784	0.165794	Amp	6.26335	-1.68303	0.167658	0.74872	Not_Sig		0.43418
K562_RS05585	K562_RS05585	CP053300	1190660	1191541	No_name	carboxylating nicotinate-nucleotide diphosphorylase	Belongs to the NadC ModD family	nadC	-0.125308	2.04559	0.466362	DMSO	0.444457	0.256836	0.458345	Amp	1.03529	-1.50921	0.205748	0.777461	Not_Sig		0.569765
K562_RS05590	K562_RS05590	CP053300	1191637	1193223	No_name	L-aspartate oxidase	Catalyzes the oxidation of L-aspartate to iminoaspartate	nadB	-0.324968	2.08276	0.214216	DMSO	0.0333534	1.75186	0.3181	Amp	2.20508	-1.61831	0.180906	0.763216	Not_Sig		0.358322
K562_RS05595	K562_RS05595	CP053300	1193392	1193559	No_name	50S ribosomal protein L33	Belongs to the bacterial ribosomal protein bL33 family	rpmG	-0.423246	3.05735	0.342751	DMSO	-0.645355	3.04602	0.565536	Amp	2.72247	0.581744	0.591948	0.948699	Not_Sig		-0.222109
K562_RS05605	K562_RS05605	CP053300	1194048	1194677	No_name	DNA repair protein RadC	Belongs to the UPF0758 family	radC	-0.0400736	1.37878	0.30379	DMSO	0.205829	0.547789	0.402222	Amp	1.75302	-0.844982	0.4457	0.918639	Not_Sig		0.245903
K562_RS05610	K562_RS05610	CP053300	1194958	1195413	No_name	peptidylprolyl isomerase	peptidyl-prolyl cis-trans isomerase	fkpB	0.537765	1.28195	0.466779	DMSO	0.00987669	1.856	0.478392	Amp	1.05038	1.36796	0.243136	0.815347	Not_Sig		-0.527888
K562_RS05615	K562_RS05615	CP053300	1195416	1196396	No_name	4-hydroxy-3-methylbut-2-enyl diphosphate reductase	Catalyzes the conversion of 1-hydroxy-2-methyl-2-(E)- butenyl 4-diphosphate (HMBPP) into a mixture of isopentenyl diphosphate (IPP) and dimethylallyl diphosphate (DMAPP). Acts in the terminal step of the DOXP MEP pathway for isoprenoid precursor biosynthesis	ispH	-2.32025	1.28195	3.27934	DMSO	-3.75755	1.856	1.05178	Amp	9.72121	0.722873	0.509765	0.937074	Not_Sig		-1.4373
K562_RS05620	K562_RS05620	CP053300	1196601	1197311	No_name	hypothetical protein	#N/A	#N/A	0.104613	1.61652	0.373175	DMSO	-0.78742	2.98439	0.558105	Amp	2.23669	2.30132	0.0828184	0.663216	Not_Sig		-0.892032
K562_RS05625	K562_RS05625	CP053300	1197523	1198473	No_name	branched-chain amino acid ABC transporter permease	Belongs to the binding-protein-dependent transport system permease family	livH2	-0.291265	1.54598	0.101875	DMSO	-0.54669	2.09472	0.209792	Amp	4.24073	1.89696	0.130696	0.703306	Not_Sig		-0.255425
K562_RS05630	K562_RS05630	CP053300	1198493	1199662	No_name	ABC transporter ATP-binding protein	Belongs to the binding-protein-dependent transport system permease family	livM2	0.035329	1.30515	0.0585038	DMSO	-0.221197	1.16728	0.027075	Amp	4.66906	6.89236	0.00232308	0.211605	Sig		-0.256526
K562_RS05635	K562_RS05635	CP053300	1199686	1200462	No_name	ABC transporter ATP-binding protein	abc transporter	livG2	-1.00014	1.48669	0.538807	DMSO	-0.201566	2.53567	0.363569	Amp	2.1963	-2.12796	0.100439	0.680788	Not_Sig		0.79857
K562_RS05640	K562_RS05640	CP053300	1200462	1201178	No_name	ABC transporter ATP-binding protein	abc transporter	livF2	0.798239	0.304712	0.186617	DMSO	0.860401	0.417183	0.153417	Amp	1.47962	-0.445673	0.678892	0.963653	Not_Sig		0.0621618
K562_RS05650	K562_RS05650	CP053300	1202868	1203539	No_name	YukJ family protein	Uncharacterized conserved protein (DUF2278)	0	-1.39809	2.3647	0.85107	DMSO	-0.949117	2.60121	0.319508	Amp	7.09522	-0.855436	0.440524	0.918354	Not_Sig		0.448977
K562_RS05655	K562_RS05655	CP053300	1203557	1204012	No_name	GNAT family acetyltransferase	PFAM GCN5-related N-acetyltransferase	0	0.220964	0.131034	0.548821	DMSO	-0.685398	1.39812	0.237718	Amp	5.33014	2.62479	0.058505	0.604892	Not_Sig		-0.906362
K562_RS05660	K562_RS05660	CP053300	1204026	1205210	No_name	acetylornithine transaminase	Aminotransferase	argD	0.385294	0.811372	0.438594	DMSO	0.219993	1.06441	0.193336	Amp	5.14637	0.597331	0.582456	0.948571	Not_Sig		-0.165301
K562_RS05665	K562_RS05665	CP053300	1205503	1206534	No_name	CDP-6-deoxy-delta-3	oxidoreductase FAD NAD(P)-binding domain protein	0	0.0695846	1.48738	0.611443	DMSO	-0.167531	1.22119	0.373106	Amp	2.68563	0.573365	0.597092	0.951116	Not_Sig		-0.237115
K562_RS05670	K562_RS05670	CP053300	1206642	1207679	No_name	NAD-dependent dehydratase	Nad-dependent epimerase dehydratase	0	-1.40929	2.0849	0.144506	DMSO	-0.82514	1.25376	0.276323	Amp	3.6565	-3.24468	0.031534	0.499524	Sig		0.584152
K562_RS05675	K562_RS05675	CP053300	1207662	1207850	No_name	hypothetical protein	0	0	1.04131	0.0600658	0.343241	DMSO	0.123679	0.381643	0.280027	Amp	1.50244	3.58795	0.0230037	0.470741	Sig		-0.917632
K562_RS05680	K562_RS05680	CP053300	1207956	1208672	No_name	pseudouridine synthase	Belongs to the pseudouridine synthase RsuA family	rsuA	-2.30431	2.20015	1.1023	DMSO	-3.16873	2.63381	0.568541	Amp	3.75902	1.20716	0.293871	0.846189	Not_Sig		-0.864422
K562_RS05685	K562_RS05685	CP053300	1208788	1209162	No_name	copper homeostasis periplasmic binding protein CopC	Copper resistance protein	0	1.03568	0.155553	1.04067	DMSO	-0.626359	0.468473	3.857	Amp	13.7365	0.720597	0.511022	0.937692	Not_Sig		-1.66204
K562_RS05690	K562_RS05690	CP053300	1209229	1209729	No_name	DinB family protein	DinB superfamily	0	0.00970844	0.765318	0.332848	DMSO	-0.391342	1.70156	0.787498	Amp	5.59766	0.81249	0.462098	0.924318	Not_Sig		-0.40105
K562_RS05695	K562_RS05695	CP053300	1209910	1210683	No_name	SDR family oxidoreductase	short-chain dehydrogenase	0	1.06008	0.326687	0.424428	DMSO	0.362165	0.770504	0.295306	Amp	2.06569	2.33792	0.0795596	0.657828	Not_Sig		-0.697917
K562_RS05700	K562_RS05700	CP053300	1210850	1211785	No_name	LysR family transcriptional regulator	transcriptional Regulator, LysR family	0	0.99099	0.253599	0.641665	DMSO	0.891693	0.0999177	0.380378	Amp	2.84569	0.230566	0.828964	0.977153	Not_Sig		-0.0992971
K562_RS05705	K562_RS05705	CP053300	1211811	1212707	No_name	LysR family transcriptional regulator	LysR substrate binding domain	0	0.11585	1.46485	0.5815	DMSO	0.0965488	1.44772	0.182926	Amp	10.1053	0.0548418	0.958894	0.995162	Not_Sig		-0.0193015
K562_RS05710	K562_RS05710	CP053300	1212814	1213704	No_name	alpha/beta hydrolase	hydrolase	0	0.858782	0.946871	0.305446	DMSO	1.06395	0.398592	0.343197	Amp	1.26246	-0.773477	0.48241	0.930054	Not_Sig		0.205169
K562_RS05715	K562_RS05715	CP053300	1213735	1214634	No_name	SDR family oxidoreductase	NAD dependent epimerase/dehydratase family	0	-1.32086	2.90157	0.547174	DMSO	-1.48516	2.58967	1.01714	Amp	3.45547	0.2464	0.8175	0.976858	Not_Sig		-0.164306
K562_RS05720	K562_RS05720	CP053300	1214678	1215415	No_name	SDR family oxidoreductase	Short-chain dehydrogenase reductase sdr	0	-0.330949	1.56783	0.321707	DMSO	-0.216835	1.82573	0.4504	Amp	1.96008	-0.357097	0.739062	0.967973	Not_Sig		0.114114
K562_RS05725	K562_RS05725	CP053300	1215537	1216439	No_name	LysR family transcriptional regulator	Transcriptional regulator, LysR family	0	0.277146	0.545451	0.374743	DMSO	0.0981538	0.942599	0.339421	Amp	1.21896	0.61317	0.572914	0.948571	Not_Sig		-0.178992
K562_RS05735	K562_RS05735	CP053300	1216761	1217927	No_name	ABC transporter substrate-binding protein	amino acid	0	0.411658	0.811032	0.382784	DMSO	0.294123	1.27052	0.243249	Amp	2.47632	0.448866	0.676772	0.963653	Not_Sig		-0.117535
K562_RS05740	K562_RS05740	CP053300	1217998	1218939	No_name	CysB family HTH-type transcriptional regulator	Transcriptional regulator	cysB	-1.03657	1.62905	0.427541	DMSO	-0.278813	1.01125	0.206056	Amp	4.30513	-2.76541	0.0505683	0.584103	Not_Sig		0.75776
K562_RS05745	K562_RS05745	CP053300	1219152	1220831	No_name	nitrite/sulfite reductase	Belongs to the nitrite and sulfite reductase 4Fe-4S domain family	cysI	-0.526025	1.48145	0.16872	DMSO	-0.00809671	1.2688	0.294093	Amp	3.03836	-2.64583	0.0572306	0.603319	Not_Sig		0.517928
K562_RS05750	K562_RS05750	CP053300	1220857	1221399	No_name	DUF934 domain-containing protein	conserved protein ucp030820	0	-0.993578	1.8636	0.446122	DMSO	0.517582	0.478683	0.523971	Amp	1.37945	-3.80346	0.0190469	0.445231	Sig		1.51116
K562_RS05755	K562_RS05755	CP053300	1221396	1222148	No_name	phosphoadenylyl-sulfate reductase	Reduction of activated sulfate into sulfite	cysH	0.7029	0.31151	0.268617	DMSO	0.289998	0.480004	0.427951	Amp	2.53818	1.41542	0.229872	0.803467	Not_Sig		-0.412902
K562_RS05760	K562_RS05760	CP053300	1222224	1223186	No_name	sulfate adenylyltransferase subunit CysD	sulfate adenylyltransferase	cysD	0.201615	1.10843	0.28604	DMSO	0.456379	0.583961	0.120574	Amp	5.62785	-1.42153	0.228217	0.800519	Not_Sig		0.254764
K562_RS05765	K562_RS05765	CP053300	1223209	1224525	No_name	sulfate adenylyltransferase subunit 1	Belongs to the TRAFAC class translation factor GTPase superfamily. Classic translation factor GTPase family. CysN NodQ subfamily	cysN	0.355654	0.82445	0.32149	DMSO	0.236388	1.25026	0.39564	Amp	1.51448	0.405218	0.706054	0.965336	Not_Sig		-0.119267
K562_RS05770	K562_RS05770	CP053300	1224586	1225335	No_name	uroporphyrinogen-III C-methyltransferase	Belongs to the precorrin methyltransferase family	cysG	0.0969848	0.527083	0.586487	DMSO	0.29913	1.55961	1.31158	Amp	5.0012	-0.243694	0.819456	0.977153	Not_Sig		0.202145
K562_RS05775	K562_RS05775	CP053300	1225417	1225800	No_name	CbiX/SirB N-terminal domain-containing protein	PFAM cobalamin (vitamin B12) biosynthesis CbiX protein	cbiX	-2.65152	3.77359	0.347918	DMSO	0.00516816	0.0192225	0.371672	Amp	1.14121	-9.03844	0.000830122	0.129193	Sig		2.65668
K562_RS05790	K562_RS05790	CP053300	1228197	1229708	No_name	leucyl aminopeptidase	Presumably involved in the processing and regular turnover of intracellular proteins. Catalyzes the removal of unsubstituted N-terminal amino acids from various peptides	pepA	-0.229192	1.28037	0.639768	DMSO	-0.664188	1.97933	0.626238	Amp	1.04368	0.84159	0.44739	0.919479	Not_Sig		-0.434996
K562_RS05800	K562_RS05800	CP053300	1230185	1230940	No_name	DUF2486 family protein	Protein of unknown function (DUF2486)	0	-0.171498	0.808184	0.491031	DMSO	-0.989646	1.99155	0.979816	Amp	3.98173	1.29299	0.26564	0.832015	Not_Sig		-0.818148
K562_RS05805	K562_RS05805	CP053300	1231078	1231404	No_name	c-type cytochrome	PFAM cytochrome c, class I	nirM	1.11849	0.138183	0.402603	DMSO	0.999237	0.177979	0.200118	Amp	4.04748	0.459436	0.669781	0.962274	Not_Sig		-0.119258
K562_RS05810	K562_RS05810	CP053300	1231533	1233206	No_name	dihydroxy-acid dehydratase	Belongs to the IlvD Edd family	ilvD	0.248959	1.24843	0.26807	DMSO	0.148457	1.07454	0.139443	Amp	3.69573	0.576086	0.595419	0.950848	Not_Sig		-0.100502
K562_RS05815	K562_RS05815	CP053300	1233341	1234255	No_name	LysR family transcriptional regulator	Transcriptional regulator	ilvR	1.2911	0.0599657	0.466423	DMSO	1.42515	0.183158	0.407962	Amp	1.30714	-0.374697	0.726905	0.965921	Not_Sig		0.134053
K562_RS05825	K562_RS05825	CP053300	1235363	1236103	No_name	SIMPL domain-containing protein	Protein of unknown function (DUF541)	0	-1.0323	2.64032	0.513364	DMSO	-1.10057	2.75995	0.71835	Amp	1.95804	0.133918	0.899935	0.984911	Not_Sig		-0.0682659
K562_RS05830	K562_RS05830	CP053300	1236286	1236747	No_name	EVE domain-containing protein	EVE domain	0	-0.578958	2.76124	0.59466	DMSO	-0.688433	2.03822	0.681286	Amp	1.31256	0.20968	0.844164	0.981647	Not_Sig		-0.109474
K562_RS05840	K562_RS05840	CP053300	1237322	1237636	No_name	cell division protein ZapA	Activator of cell division through the inhibition of FtsZ GTPase activity, therefore promoting FtsZ assembly into bundles of protofilaments necessary for the formation of the division Z ring. It is recruited early at mid-cell but it is not essential for cell division	zapA	1.45658	0.0155786	0.37428	DMSO	0.782923	0.0920308	0.363815	Amp	1.05835	2.23541	0.0890744	0.669601	Not_Sig		-0.673655
K562_RS05845	K562_RS05845	CP053300	1237633	1237983	No_name	ATPase	0	0	-0.18733	1.519	0.325294	DMSO	-0.184799	1.15882	0.410104	Amp	1.58941	-0.00837408	0.99372	0.999047	Not_Sig		0.00253077
K562_RS05850	K562_RS05850	CP053300	1238429	1239532	No_name	iron ABC transporter permease	Belongs to the binding-protein-dependent transport system permease family. FecCD subfamily	btuC	0.935554	0.185551	0.269565	DMSO	0.950309	0.0764542	0.14329	Amp	3.53914	-0.0837169	0.937304	0.992912	Not_Sig		0.0147555
K562_RS05855	K562_RS05855	CP053300	1239529	1240344	No_name	ABC transporter ATP-binding protein	ABC transporter	btuD	-0.214836	2.62479	1.22461	DMSO	-0.836723	2.42677	0.999821	Amp	1.5002	0.68134	0.53306	0.940833	Not_Sig		-0.621888
K562_RS05860	K562_RS05860	CP053300	1240406	1241461	No_name	nicotinate-nucleotide--dimethylbenzimidazole phosphoribosyltransferase	Catalyzes the synthesis of alpha-ribazole-5'-phosphate from nicotinate mononucleotide (NAMN) and 5,6- dimethylbenzimidazole (DMB)	cobT	0.521133	0.309056	0.373132	DMSO	0.553157	0.287594	0.519025	Amp	1.93487	-0.0867716	0.935023	0.991805	Not_Sig		0.0320238
K562_RS05865	K562_RS05865	CP053300	1241475	1242227	No_name	adenosylcobinamide-GDP ribazoletransferase	Joins adenosylcobinamide-GDP and alpha-ribazole to generate adenosylcobalamin (Ado-cobalamin). Also synthesizes adenosylcobalamin 5'-phosphate from adenosylcobinamide-GDP and alpha-ribazole 5'-phosphate	cobS	0.259616	0.736039	0.898368	DMSO	0.106885	1.05668	0.364499	Amp	6.07458	0.272861	0.798468	0.974972	Not_Sig		-0.152731
K562_RS05870	K562_RS05870	CP053300	1242212	1242796	No_name	alpha-ribazole phosphatase	alpha-ribazole phosphatase	cobC	-0.23628	1.89732	0.457562	DMSO	-0.0860332	1.65013	0.575144	Amp	1.57998	-0.354084	0.741153	0.967973	Not_Sig		0.150246
K562_RS05875	K562_RS05875	CP053300	1242901	1243818	No_name	cobalamin-binding protein	Periplasmic binding protein	btuF	0.990066	0.0763639	0.108034	DMSO	0.75165	0.000470911	0.0181692	Amp	35.3547	3.76946	0.0196137	0.454883	Sig		-0.238416
K562_RS05885	K562_RS05885	CP053300	1244824	1245768	No_name	cobalamin biosynthesis protein	Converts cobyric acid to cobinamide by the addition of aminopropanol on the F carboxylic group	cobD	-1.20812	2.40579	0.125359	DMSO	-0.350333	2.07721	0.500925	Amp	15.9674	-2.87724	0.0451384	0.566769	Sig		0.857785
K562_RS05890	K562_RS05890	CP053300	1245762	1246316	No_name	bifunctional adenosylcobinamide kinase/adenosylcobinamide-phosphate guanylyltransferase	Catalyzes ATP-dependent phosphorylation of adenosylcobinamide and addition of GMP to adenosylcobinamide phosphate	cobU	-3.60759	2.40579	2.06432	DMSO	-0.445638	2.07721	0.512329	Amp	16.2352	-2.57489	0.0616594	0.614703	Not_Sig		3.16195
K562_RS05895	K562_RS05895	CP053300	1246392	1247894	No_name	cobyric acid synthase	Catalyzes amidations at positions B, D, E, and G on adenosylcobyrinic A,C-diamide. NH(2) groups are provided by glutamine, and one molecule of ATP is hydrogenolyzed for each amidation	cobQ	0.571398	0.758818	0.364338	DMSO	-0.0630629	1.53659	0.0651893	Amp	31.236	2.96906	0.0411827	0.551411	Sig		-0.634461
K562_RS05900	K562_RS05900	CP053300	1247977	1248114	No_name	hypothetical protein	#N/A	#N/A	0.92896	0.0119287	0.082889	DMSO	-0.970803	2.52052	0.490798	Amp	35.06	6.61075	0.00271419	0.2238	Sig		-1.89976
K562_RS05905	K562_RS05905	CP053300	1248264	1248677	No_name	DoxX family protein	PFAM DoxX family protein	0	0.912726	0.57623	0.558862	DMSO	0.373082	0.277714	0.24233	Amp	5.31857	1.53445	0.199707	0.772446	Not_Sig		-0.539644
K562_RS05910	K562_RS05910	CP053300	1248825	1249487	No_name	ParA family protein	Cobyrinic acid ac-diamide synthase	0	0.0420822	1.6042	0.405749	DMSO	0.000458866	1.8186	0.227985	Amp	3.16739	0.154903	0.8844	0.982962	Not_Sig		-0.0416234
K562_RS05915	K562_RS05915	CP053300	1249619	1250005	No_name	aspartate 1-decarboxylase	Catalyzes the pyruvoyl-dependent decarboxylation of aspartate to produce beta-alanine	panD	1.05274	0.104358	0.88576	DMSO	0.967022	0.110771	0.494559	Amp	3.20771	0.146346	0.890728	0.984593	Not_Sig		-0.0857157
K562_RS05925	K562_RS05925	CP053300	1251160	1252032	No_name	segregation/condensation protein A	Participates in chromosomal partition during cell division. May act via the formation of a condensin-like complex containing Smc and ScpB that pull DNA away from mid-cell into both cell halves	scpA	-2.18087	0.104358	3.05927	DMSO	-0.998101	0.110771	2.75222	Amp	1.23558	-0.497831	0.644729	0.9605	Not_Sig		1.18277
K562_RS05930	K562_RS05930	CP053300	1252037	1252225	No_name	DUF3460 family protein	Protein of unknown function (DUF3460)	0	1.273	0.00339318	0.171877	DMSO	1.11819	0.0193311	0.209335	Amp	1.48337	0.989909	0.378255	0.892075	Not_Sig		-0.154801
K562_RS05935	K562_RS05935	CP053300	1252442	1254256	No_name	outer membrane protein assembly factor	PFAM surface antigen (D15)	0	-0.249165	1.99203	0.162601	DMSO	-0.504028	2.06636	0.308849	Amp	3.60783	1.26472	0.274637	0.836015	Not_Sig		-0.254863
K562_RS05940	K562_RS05940	CP053300	1254302	1258345	No_name	translocation/assembly module TamB domain-containing protein	TamB, inner membrane protein subunit of TAM complex	0	0.0677687	1.46884	0.306574	DMSO	0.00629411	1.56988	0.548131	Amp	3.19667	0.169539	0.873602	0.981699	Not_Sig		-0.0614746
K562_RS05945	K562_RS05945	CP053300	1258438	1260594	No_name	methionine--tRNA ligase	Is required not only for elongation of protein synthesis but also for the initiation of all mRNA translation through initiator tRNA(fMet) aminoacylation	metG	-0.773833	2.13406	0.476792	DMSO	-0.970833	1.98966	0.460102	Amp	1.07387	0.51497	0.633724	0.959237	Not_Sig		-0.197
K562_RS05950	K562_RS05950	CP053300	1260975	1261622	No_name	OmpA family protein	Belongs to the ompA family	0	0.43449	0.82451	0.240902	DMSO	0.658664	0.615965	0.300187	Amp	1.55275	-1.00879	0.370143	0.891107	Not_Sig		0.224174
K562_RS05955	K562_RS05955	CP053300	1261975	1263066	No_name	iron-sulfur cluster carrier protein ApbC	Binds and transfers iron-sulfur (Fe-S) clusters to target apoproteins. Can hydrolyze ATP	mrp	0.0767479	0.00347612	0.265431	DMSO	0.189822	0.00208227	0.26868	Amp	1.02463	-0.518562	0.631432	0.959232	Not_Sig		0.113075
K562_RS05960	K562_RS05960	CP053300	1263200	1263736	No_name	superoxide dismutase [Cu-Zn]	PFAM superoxide dismutase, copper zinc binding	sodC	-0.963934	3.13151	1.25567	DMSO	0.109212	3.26293	1.07992	Amp	1.35198	-1.12231	0.324544	0.86815	Not_Sig		1.07315
K562_RS05970	K562_RS05970	CP053300	1264583	1266862	No_name	arginine/lysine/ornithine decarboxylase	orn lys arg decarboxylase	adi	0.348319	0.680002	0.159639	DMSO	0.335264	0.688529	0.305956	Amp	3.67316	0.0655246	0.9509	0.995107	Not_Sig		-0.0130553
K562_RS05975	K562_RS05975	CP053300	1266862	1267683	No_name	DUF1311 domain-containing protein	Lysozyme inhibitor LprI	0	1.44829	0.0655389	0.142779	DMSO	1.56792	0.0170558	0.145348	Amp	1.03632	-1.01704	0.366646	0.889894	Not_Sig		0.119637
K562_RS05980	K562_RS05980	CP053300	1267762	1268445	No_name	HAD family phosphatase	IA, variant 3	0	1.484	0.247377	0.226061	DMSO	1.00529	0.307101	0.458067	Amp	4.10589	1.62318	0.179872	0.763216	Not_Sig		-0.478705
K562_RS05985	K562_RS05985	CP053300	1268542	1269951	No_name	argininosuccinate lyase	argininosuccinate lyase	argH	0.606134	1.54069	0.143706	DMSO	0.698994	1.52781	0.437958	Amp	9.28787	-0.348942	0.744726	0.967973	Not_Sig		0.0928602
K562_RS05990	K562_RS05990	CP053300	1270041	1272377	No_name	fimbrial biogenesis outer membrane usher protein	outer membrane usher protein	0	-0.098379	1.95283	0.540917	DMSO	-0.0696994	1.36765	0.548022	Amp	1.02644	-0.0645114	0.951658	0.995107	Not_Sig		0.0286796
K562_RS05995	K562_RS05995	CP053300	1272450	1273160	No_name	molecular chaperone	Pili and flagellar-assembly chaperone, PapD N-terminal domain	0	1.28625	0.279782	0.48816	DMSO	1.27137	0.542653	0.733296	Amp	2.25649	0.0292664	0.978054	0.997585	Not_Sig		-0.0148849
K562_RS06000	K562_RS06000	CP053300	1273167	1273703	No_name	spore coat U domain-containing protein	Spore coat	0	0.998586	0.327208	0.585995	DMSO	1.09004	0.146851	0.449432	Amp	1.70005	-0.214498	0.84065	0.98107	Not_Sig		0.091456
K562_RS06005	K562_RS06005	CP053300	1274000	1274995	No_name	spore coat protein U domain-containing protein	Spore Coat Protein U domain	0	0.288964	1.30483	0.0448936	DMSO	0.322029	2.09208	0.350502	Amp	60.9554	NA	NA	NA	Not_tested		0.0330654
K562_RS06010	K562_RS06010	CP053300	1275003	1275812	No_name	helix-turn-helix domain-containing protein	TRANSCRIPTIONal	0	1.19061	0.370862	0.643182	DMSO	0.604904	0.48471	0.651984	Amp	1.02756	1.1077	0.330113	0.874681	Not_Sig		-0.585709
K562_RS06015	K562_RS06015	CP053300	1276031	1276783	No_name	class I SAM-dependent methyltransferase	Methyltransferase	0	0.242609	0.928088	0.897582	DMSO	-1.00678	2.78997	1.00087	Amp	1.2434	1.60965	0.18276	0.763216	Not_Sig		-1.24939
K562_RS06020	K562_RS06020	CP053300	1276907	1279921	No_name	phosphoenolpyruvate carboxylase	Forms oxaloacetate, a four-carbon dicarboxylic acid source for the tricarboxylic acid cycle	ppc	0.585717	1.30663	0.468752	DMSO	0.674736	0.520408	0.166179	Amp	7.95673	-0.31002	0.772026	0.972764	Not_Sig		0.0890185
K562_RS06030	K562_RS06030	CP053300	1281134	1283104	No_name	fused uroporphyrinogen-III synthase HemD/membrane protein HemX	Uroporphyrinogen III synthase HEM4	hemX	0.721234	0.882584	0.429182	DMSO	0.1458	1.32991	0.341935	Amp	1.57542	1.8163	0.143492	0.722568	Not_Sig		-0.575434
K562_RS06035	K562_RS06035	CP053300	1283107	1284294	No_name	heme biosynthesis protein HemY	PFAM HemY domain protein	hemY	0.50405	0.581358	0.337712	DMSO	0.576891	0.453124	0.318973	Amp	1.12095	-0.271593	0.799376	0.974972	Not_Sig		0.0728412
K562_RS06040	K562_RS06040	CP053300	1284392	1285618	No_name	alpha/beta fold hydrolase	Domain of unknown function (DUF4180)	0	0.33082	0.841445	0.165544	DMSO	-0.042148	1.31258	0.180995	Amp	1.19538	2.63369	0.057962	0.604892	Not_Sig		-0.372968
K562_RS06045	K562_RS06045	CP053300	1285615	1286028	No_name	helix-turn-helix domain-containing protein	Helix-turn-helix domain	0	-0.807531	2.49143	1.13569	DMSO	-0.370314	2.56463	1.06852	Amp	1.12967	-0.485642	0.652623	0.960654	Not_Sig		0.437217
K562_RS06050	K562_RS06050	CP053300	1286284	1287588	No_name	MFS transporter	PFAM major facilitator superfamily MFS_1	0	0.519916	0.959438	0.34367	DMSO	0.929981	0.41484	0.383422	Amp	1.24472	-1.3794	0.23987	0.813435	Not_Sig		0.410066
K562_RS06055	K562_RS06055	CP053300	1287734	1288492	No_name	SDR family oxidoreductase	Catalyzes the first of the two reduction steps in the elongation cycle of fatty acid synthesis	tsaC	0.121362	1.29686	0.22027	DMSO	0.304745	1.1642	0.27987	Amp	1.61438	-0.89183	0.422885	0.915703	Not_Sig		0.183383
K562_RS06060	K562_RS06060	CP053300	1288578	1290017	No_name	aldehyde dehydrogenase family protein	belongs to the aldehyde dehydrogenase family	0	-1.06485	1.77923	0.25621	DMSO	-1.51278	1.92491	0.141668	Amp	3.27074	2.65003	0.05698	0.603319	Not_Sig		-0.447935
K562_RS06070	K562_RS06070	CP053300	1290837	1291707	No_name	GIY-YIG nuclease family protein	#N/A	#N/A	-0.0180178	1.43624	0.268509	DMSO	-0.964111	2.43831	0.0819765	Amp	10.7285	5.83691	0.00429417	0.261812	Sig		-0.946093
K562_RS06075	K562_RS06075	CP053300	1291757	1292791	No_name	AraC family transcriptional regulator	Arabinose-binding domain of AraC transcription regulator, N-term	0	-0.207828	2.01016	0.984791	DMSO	1.2116	0.677584	1.16955	Amp	1.41042	-1.608	0.183117	0.763216	Not_Sig		1.41943
K562_RS06080	K562_RS06080	CP053300	1292943	1295189	No_name	glycoside hydrolase family 3 protein	PFAM glycoside hydrolase family 3 domain protein	0	1.03107	0.268026	0.192212	DMSO	0.493089	1.05533	0.126868	Amp	2.29539	4.04599	0.015527	0.411167	Sig		-0.537984
K562_RS06085	K562_RS06085	CP053300	1295261	1296439	No_name	N-acetyltransferase	Peptidogalycan biosysnthesis/recognition	0	1.24048	0.376128	0.467423	DMSO	0.916112	0.245008	0.111347	Amp	17.6224	1.16924	0.30723	0.855302	Not_Sig		-0.324369
K562_RS06090	K562_RS06090	CP053300	1296549	1298267	No_name	NAD+ synthase	Catalyzes the ATP-dependent amidation of deamido-NAD to form NAD. Uses L-glutamine as a nitrogen source	nadE	1.09971	0.395266	0.402931	DMSO	1.06409	0.26152	0.349557	Amp	1.32869	0.115658	0.913498	0.988771	Not_Sig		-0.0356196
K562_RS06095	K562_RS06095	CP053300	1298351	1298689	No_name	P-II family nitrogen regulator	Belongs to the P(II) protein family	glnB	0.419897	1.17027	0.557637	DMSO	0.214349	1.15188	0.148349	Amp	14.1297	0.616984	0.570632	0.948571	Not_Sig		-0.205548
K562_RS06100	K562_RS06100	CP053300	1298835	1299911	No_name	porin	Gram-negative porin	0	-0.447826	1.66611	0.508249	DMSO	0.0443815	1.53729	0.330035	Amp	2.37156	-1.40681	0.232225	0.805732	Not_Sig		0.492208
K562_RS06105	K562_RS06105	CP053300	1300459	1301385	No_name	LysR family transcriptional regulator	LysR substrate binding domain	0	0.499641	0.803334	0.212091	DMSO	1.32748	0.371596	0.448754	Amp	4.47685	-2.8888	0.0446165	0.563808	Sig		0.827837
K562_RS06110	K562_RS06110	CP053300	1301520	1302017	No_name	GNAT family N-acetyltransferase	PFAM GCN5-related N-acetyltransferase	0	-0.944949	1.68377	0.694	DMSO	-1.34829	2.87089	0.126609	Amp	30.0464	0.990283	0.378093	0.892075	Not_Sig		-0.403337
K562_RS06115	K562_RS06115	CP053300	1302084	1302863	No_name	ABC transporter ATP-binding protein	PFAM ABC transporter related	0	1.00669	0.574111	0.703433	DMSO	0.691657	0.352757	0.220319	Amp	10.194	0.74024	0.500249	0.932226	Not_Sig		-0.315032
K562_RS06120	K562_RS06120	CP053300	1302882	1303595	No_name	ABC transporter permease	TIGRFAM polar amino acid ABC transporter, inner membrane subunit	0	1.00102	0.107009	0.0405256	DMSO	1.00741	0.371789	0.221885	Amp	29.9776	-0.0490324	0.963244	0.995566	Not_Sig		0.00638521
K562_RS06125	K562_RS06125	CP053300	1303592	1304281	No_name	histidine ABC transporter permease HisQ	TIGRFAM polar amino acid ABC transporter, inner membrane subunit	0	0.685742	0.875826	0.129063	DMSO	0.225658	1.64076	0.399783	Amp	9.59498	1.8969	0.130705	0.703306	Not_Sig		-0.460084
K562_RS06130	K562_RS06130	CP053300	1304511	1305293	No_name	ABC transporter substrate-binding protein	belongs to the bacterial solute-binding protein 3 family	hisJ	-0.20018	1.94591	0.406751	DMSO	-0.921108	2.91719	0.461034	Amp	1.28472	2.03099	0.112087	0.689076	Not_Sig		-0.720928
K562_RS06135	K562_RS06135	CP053300	1305660	1306364	No_name	pirin family protein	Belongs to the pirin family	0	0.92868	0.374413	0.120309	DMSO	1.14135	0.00528362	0.112056	Amp	1.15274	-2.24043	0.08858	0.669601	Not_Sig		0.212667
K562_RS06140	K562_RS06140	CP053300	1306434	1306988	No_name	periplasmic heavy metal sensor	Heavy-metal resistance	0	-0.140597	1.75887	0.1883	DMSO	-0.142417	1.51905	0.232229	Amp	1.52101	0.0105472	0.99209	0.999047	Not_Sig		-0.0018206
K562_RS06145	K562_RS06145	CP053300	1307213	1307938	No_name	response regulator	response regulator	0	-0.696333	2.16951	0.837507	DMSO	-0.84391	2.43501	0.14205	Amp	34.761	0.300906	0.778479	0.972764	Not_Sig		-0.147577
K562_RS06150	K562_RS06150	CP053300	1307922	1309238	No_name	HAMP domain-containing protein	HAMP (Histidine kinases, Adenylyl cyclases, Methyl binding proteins, Phosphatases) domain	0	0.911408	0.864769	0.502656	DMSO	0.796775	1.53796	1.2296	Amp	5.98395	0.149469	0.888417	0.984305	Not_Sig		-0.114634
K562_RS06155	K562_RS06155	CP053300	1309281	1309547	No_name	hypothetical protein	0	0	-0.482641	2.13134	0.36223	DMSO	-0.39028	2.02083	0.297172	Amp	1.48577	-0.341436	0.749958	0.967973	Not_Sig		0.0923607
K562_RS06160	K562_RS06160	CP053300	1310055	1311812	No_name	ABC transporter permease subunit	PFAM binding-protein-dependent transport systems inner membrane component	0	0.235833	1.33514	0.126416	DMSO	0.0968345	1.49823	0.22148	Amp	3.06949	0.944058	0.398595	0.907698	Not_Sig		-0.138999
K562_RS06165	K562_RS06165	CP053300	1311835	1313125	No_name	nitrate/sulfonate/bicarbonate ABC transporter ATP-binding protein	#N/A	#N/A	-0.252532	1.66773	0.425622	DMSO	0.106976	1.39298	0.135625	Amp	9.84842	-1.39394	0.235784	0.807886	Not_Sig		0.359508
K562_RS06170	K562_RS06170	CP053300	1313189	1313683	No_name	hypothetical protein	#N/A	#N/A	-0.146258	0.911055	0.277202	DMSO	0.624036	0.314821	0.375361	Amp	1.8336	-2.85925	0.0459644	0.570475	Sig		0.770294
K562_RS06175	K562_RS06175	CP053300	1313680	1314231	No_name	hypothetical protein	0	0	-0.578572	2.7954	0.50942	DMSO	0.689492	0.38692	0.939781	Amp	3.4033	-2.05464	0.109114	0.683949	Not_Sig		1.26806
K562_RS06180	K562_RS06180	CP053300	1314520	1314729	No_name	hypothetical protein	#N/A	#N/A	1.34629	2.7954	0.257675	DMSO	1.17921	0.38692	0.353618	Amp	1.88332	0.661407	0.544507	0.94241	Not_Sig		-0.167081
K562_RS06185	K562_RS06185	CP053300	1314868	1316292	No_name	alpha	Probably involved in the osmoprotection via the biosynthesis of trehalose. Catalyzes the transfer of glucose from UDP-glucose (UDP-Glc) to D-glucose 6-phosphate (Glc-6-P) to form trehalose-6-phosphate. Acts with retention of the anomeric configuration of the UDP-sugar donor	otsA	0.580807	0.733417	0.468982	DMSO	-0.288641	1.84418	0.0631923	Amp	55.0787	NA	NA	NA	Not_tested		-0.869448
K562_RS06190	K562_RS06190	CP053300	1316285	1316878	No_name	AAA family ATPase	Predicted ATPase of the ABC class	0	0.00217357	2.02115	0.96961	DMSO	0.430566	0.974017	1.00761	Amp	1.07993	-0.530618	0.623776	0.956942	Not_Sig		0.428393
K562_RS06195	K562_RS06195	CP053300	1316909	1318276	No_name	MFS transporter	PFAM major facilitator superfamily MFS_1	0	0.224816	1.95615	0.370624	DMSO	-0.435827	2.51016	0.720136	Amp	3.77539	1.41283	0.230577	0.804332	Not_Sig		-0.660643
K562_RS06200	K562_RS06200	CP053300	1318462	1318842	No_name	DUF5594 family protein	0	0	1.08899	0.285783	0.297149	DMSO	-0.563617	2.69081	0.803517	Amp	7.31209	3.34119	0.028804	0.492199	Sig		-1.65261
K562_RS06205	K562_RS06205	CP053300	1318960	1319364	No_name	hypothetical protein	0	0	1.15911	0.135964	0.320748	DMSO	0.64271	0.293597	0.30912	Amp	1.07664	2.00789	0.115076	0.690765	Not_Sig		-0.516401
K562_RS06210	K562_RS06210	CP053300	1319563	1319889	No_name	hypothetical protein	0	0	-4.79611	0.135964	0.568	DMSO	-5.10828	0.293597	0.219629	Amp	6.68836	0.887866	0.424777	0.915703	Not_Sig		-0.312171
K562_RS06215	K562_RS06215	CP053300	1320033	1320533	No_name	serine protease inhibitor ecotin	Belongs to the protease inhibitor I11 (ecotin) family	eco	0.548031	2.5666	0.4773	DMSO	0.569093	1.25126	0.435645	Amp	1.20038	-0.0564518	0.957689	0.995162	Not_Sig		0.0210619
K562_RS06220	K562_RS06220	CP053300	1320555	1321178	No_name	TetR/AcrR family transcriptional regulator	PFAM regulatory protein TetR	0	1.55674	0.00190001	0.0823115	DMSO	1.04038	0.0501753	0.216664	Amp	6.92871	3.85879	0.0181659	0.43672	Sig		-0.51636
K562_RS06225	K562_RS06225	CP053300	1321294	1322034	No_name	SDR family NAD(P)-dependent oxidoreductase	Short-chain dehydrogenase reductase SDR	0	-0.021346	1.63742	0.111548	DMSO	-0.218571	1.86187	0.0941559	Amp	1.40355	2.34018	0.0793628	0.657828	Not_Sig		-0.197225
K562_RS06240	K562_RS06240	CP053300	1322753	1322896	No_name	hypothetical protein	#N/A	#N/A	1.25363	0.17546	0.523472	DMSO	0.665724	0.101224	0.421537	Amp	1.54211	1.51508	0.204326	0.7772	Not_Sig		-0.587908
K562_RS06245	K562_RS06245	CP053300	1322895	1323476	No_name	sigma-70 family RNA polymerase sigma factor	#N/A	#N/A	0.361429	1.36037	0.61153	DMSO	0.197254	0.500883	0.209919	Amp	8.48661	0.439804	0.682798	0.963653	Not_Sig		-0.164174
K562_RS06250	K562_RS06250	CP053300	1323489	1323797	No_name	hypothetical protein	0	0	0.884295	0.136372	0.0495646	DMSO	0.27896	0.711605	0.099081	Amp	3.99612	9.46387	0.00069538	0.124621	Sig		-0.605335
K562_RS06255	K562_RS06255	CP053300	1323800	1324096	No_name	4Fe-4S binding protein	4Fe-4S dicluster domain	0	-0.946405	2.66147	0.193491	DMSO	-0.257363	1.72059	0.322774	Amp	2.78275	-3.17133	0.0338148	0.512261	Sig		0.689042
K562_RS06260	K562_RS06260	CP053300	1324203	1324919	No_name	class I SAM-dependent methyltransferase	O-methyltransferase family 3	0	0.285898	1.14353	0.810087	DMSO	0.686781	0.580441	0.441714	Amp	3.36342	-0.75253	0.493595	0.930894	Not_Sig		0.400883
K562_RS06265	K562_RS06265	CP053300	1324961	1325035	No_name	tRNA-Arg	#N/A	#N/A	0.679901	1.14353	1.14595	DMSO	1.59719	0.580441	1.01236	Amp	1.28131	-1.03906	0.357459	0.886667	Not_Sig		0.91729
K562_RS06270	K562_RS06270	CP053300	1325184	1325366	No_name	rubredoxin	PFAM Rubredoxin-type Fe(Cys)4 protein	rubA2	-1.06445	1.53759	0.870578	DMSO	0.38578	0.302931	0.519243	Amp	2.81109	-2.478	0.0683575	0.637243	Not_Sig		1.45023
K562_RS06275	K562_RS06275	CP053300	1325565	1325969	No_name	DUF4399 domain-containing protein	Domain of unknown function (DUF4399)	0	0.199925	1.67796	0.963233	DMSO	0.116417	1.1619	0.469954	Amp	4.20099	0.134956	0.899165	0.984911	Not_Sig		-0.0835082
K562_RS06280	K562_RS06280	CP053300	1326200	1328185	No_name	ATP-binding cassette domain-containing protein	#N/A	#N/A	-0.340675	1.73168	0.187182	DMSO	-0.166024	1.54202	0.317659	Amp	2.88001	-0.820446	0.45804	0.922405	Not_Sig		0.174651
K562_RS06285	K562_RS06285	CP053300	1328406	1330388	No_name	type IIA DNA topoisomerase subunit B	Topoisomerase IV is essential for chromosome segregation. It relaxes supercoiled DNA. Performs the decatenation events required during the replication of a circular DNA molecule	parE	-5.15354	1.73168	2.04811	DMSO	-3.5498	1.54202	3.19865	Amp	2.43908	-0.731342	0.505108	0.935149	Not_Sig		1.60374
K562_RS06295	K562_RS06295	CP053300	1333041	1333499	No_name	CopD family protein	Copper resistance protein D	0	1.31114	0.114573	0.384227	DMSO	0.900662	0.00900755	0.103494	Amp	13.783	1.78671	0.148519	0.725963	Not_Sig		-0.410478
K562_RS06300	K562_RS06300	CP053300	1333553	1334437	No_name	LysR family transcriptional regulator	Transcriptional regulator, LysR family	0	-0.418781	2.08428	0.806022	DMSO	-0.878178	2.19916	0.241197	Amp	11.1674	0.945755	0.397825	0.907608	Not_Sig		-0.459397
K562_RS06305	K562_RS06305	CP053300	1334550	1334996	No_name	multidrug/biocide efflux PACE transporter	PFAM transmembrane pair domain protein	0	-0.856827	2.01722	0.370835	DMSO	-0.0366698	1.09516	0.840297	Amp	5.13456	-1.54663	0.196857	0.767647	Not_Sig		0.820158
K562_RS06310	K562_RS06310	CP053300	1335042	1336250	No_name	chromate transporter	chromate transporter	0	-0.041841	1.41226	0.653811	DMSO	0.681861	0.292481	0.137743	Amp	22.5301	-1.87602	0.133895	0.707015	Not_Sig		0.723702
K562_RS06315	K562_RS06315	CP053300	1336455	1338794	No_name	EAL domain-containing protein	GGDEF domain containing protein	0	0.0818244	2.23068	0.200694	DMSO	-0.0218227	1.79291	0.31573	Amp	2.47493	0.479855	0.65639	0.960654	Not_Sig		-0.103647
K562_RS06320	K562_RS06320	CP053300	1339011	1339895	No_name	PhzF family phenazine biosynthesis protein	phenazine biosynthesis protein PhzF family	0	-1.1872	2.23875	1.04852	DMSO	-0.873286	2.5299	0.570474	Amp	3.37817	-0.455495	0.672383	0.963452	Not_Sig		0.31391
K562_RS06325	K562_RS06325	CP053300	1339909	1340367	No_name	RidA family protein	endoribonuclease L-PSP	0	0.150427	1.34313	0.707255	DMSO	0.697422	0.530166	0.370157	Amp	3.65074	-1.18685	0.300956	0.849571	Not_Sig		0.546995
K562_RS06330	K562_RS06330	CP053300	1340410	1341591	No_name	PLP-dependent aminotransferase family protein	PFAM aminotransferase class I and II	0	0.494608	0.893552	0.147646	DMSO	0.356413	0.912434	0.0471575	Amp	9.80264	1.54432	0.197394	0.767647	Not_Sig		-0.138195
K562_RS06335	K562_RS06335	CP053300	1341743	1342651	No_name	DMT family transporter	EamA-like transporter family	0	-0.0642845	2.25056	1.32282	DMSO	0.156052	1.5158	0.432	Amp	9.37631	-0.274247	0.797476	0.974972	Not_Sig		0.220336
K562_RS06340	K562_RS06340	CP053300	1342706	1343398	No_name	VOC family protein	Glyoxalase-like domain	0	-0.0194295	0.969413	0.488847	DMSO	0.24777	1.80806	0.595139	Amp	1.48215	-0.60091	0.580291	0.948571	Not_Sig		0.267199
K562_RS06345	K562_RS06345	CP053300	1343629	1345089	No_name	PLP-dependent aminotransferase family protein	Regulatory protein GntR HTH	0	0.4241	1.35483	0.498171	DMSO	0.353482	1.33952	0.255395	Amp	3.80479	0.218488	0.837744	0.980102	Not_Sig		-0.0706182
K562_RS06350	K562_RS06350	CP053300	1345268	1347166	No_name	molecular chaperone HtpG	Molecular chaperone. Has ATPase activity	htpG	0.299054	1.4399	0.322194	DMSO	0.316289	1.6027	0.411374	Amp	1.63019	-0.0571268	0.957184	0.995162	Not_Sig		0.0172342
K562_RS06355	K562_RS06355	CP053300	1347175	1347771	No_name	chorismate lyase	Removes the pyruvyl group from chorismate, with concomitant aromatization of the ring, to provide 4- hydroxybenzoate (4HB) for the ubiquinone pathway	ubiC	0.932279	0.00123883	0.0243261	DMSO	0.629815	0.291628	0.979464	Amp	1621.19	NA	NA	NA	Not_tested		-0.302463
K562_RS06360	K562_RS06360	CP053300	1347771	1348250	No_name	DNA-deoxyinosine glycosylase	glycosylase	mug	0.5583	0.562306	0.0358505	DMSO	-0.284748	2.44224	1.33977	Amp	1396.59	NA	NA	NA	Not_tested		-0.843048
K562_RS06365	K562_RS06365	CP053300	1348274	1349470	No_name	DUF2029 domain-containing protein	Glycosyltransferase family 87	0	-0.860729	1.7413	0.262751	DMSO	-0.844589	1.5017	0.126498	Amp	4.31441	-0.0958681	0.928236	0.989932	Not_Sig		0.0161408
K562_RS06370	K562_RS06370	CP053300	1349765	1350019	No_name	hypothetical protein	0	0	0.91556	0.219162	0.156068	DMSO	1.10059	0.122146	0.35441	Amp	5.15682	-0.827563	0.454433	0.921644	Not_Sig		0.185026
K562_RS06375	K562_RS06375	CP053300	1350165	1351082	No_name	spermidine synthase	Spermidine synthase	0	-0.435477	2.78	0.205512	DMSO	-0.221217	2.59849	0.162062	Amp	1.6081	-1.41795	0.229185	0.802488	Not_Sig		0.21426
K562_RS06380	K562_RS06380	CP053300	1351281	1351523	No_name	DUF3311 domain-containing protein	Protein of unknown function (DUF3311)	0	-0.723622	2.34895	0.740443	DMSO	-1.83552	2.08988	0.811917	Amp	1.20238	1.75262	0.154542	0.734483	Not_Sig		-1.1119
K562_RS06385	K562_RS06385	CP053300	1351520	1353070	No_name	sodium:solute symporter family protein	Belongs to the sodium solute symporter (SSF) (TC 2.A.21) family	0	0.109754	1.46558	0.0423821	DMSO	0.201316	1.06288	0.116745	Amp	7.58773	-1.27688	0.270731	0.83512	Not_Sig		0.0915611
K562_RS06390	K562_RS06390	CP053300	1353170	1353625	No_name	VOC family protein	Glyoxalase bleomycin resistance protein dioxygenase	0	-0.0522295	2.21218	2.27455	DMSO	0.53207	1.9467	2.08673	Amp	1.18811	-0.327864	0.759458	0.971883	Not_Sig		0.584299
K562_RS06395	K562_RS06395	CP053300	1353868	1354821	No_name	transaldolase	Transaldolase is important for the balance of metabolites in the pentose-phosphate pathway	tal	-3.33946	1.14575	1.48328	DMSO	-1.72213	1.14811	1.10114	Amp	1.8145	-1.5164	0.204009	0.7772	Not_Sig		1.61733
K562_RS06400	K562_RS06400	CP053300	1354990	1356201	No_name	benzoate/H(+) symporter BenE family transporter	benzoate membrane transport protein	benE	0.698975	1.14779	0.733394	DMSO	0.970361	0.370126	0.241036	Amp	9.25786	-0.60889	0.575482	0.948571	Not_Sig		0.271387
K562_RS06405	K562_RS06405	CP053300	1356258	1357433	No_name	VWA domain-containing protein	VWA containing CoxE family protein	0	-0.115919	1.73715	0.424266	DMSO	0.0535594	1.66614	0.1882	Amp	5.08202	-0.632458	0.561436	0.94695	Not_Sig		0.169479
K562_RS06410	K562_RS06410	CP053300	1357458	1358300	No_name	MoxR family ATPase	ATPase associated with various cellular activities, AAA_5	0	0.749021	1.57993	0.501523	DMSO	0.763333	1.09729	0.283819	Amp	3.12246	-0.0430175	0.967749	0.997164	Not_Sig		0.0143121
K562_RS06415	K562_RS06415	CP053300	1358546	1358905	No_name	cytochrome c	Cytochrome c class	0	-1.02635	1.7919	0.380521	DMSO	-0.736513	1.92251	0.529521	Amp	1.93646	-0.769881	0.484316	0.930054	Not_Sig		0.289837
K562_RS06420	K562_RS06420	CP053300	1358946	1359305	No_name	cytochrome c	PFAM cytochrome c, class I	0	-0.376961	1.66568	0.386588	DMSO	-0.29706	1.72682	0.520568	Amp	1.81325	-0.213432	0.841428	0.98107	Not_Sig		0.0799007
K562_RS06425	K562_RS06425	CP053300	1359408	1359842	No_name	DUF1841 family protein	Domain of unknown function (DUF1841)	0	0.333005	0.878887	0.172434	DMSO	0.801693	0.65289	0.514954	Amp	8.91846	-1.49485	0.209269	0.777461	Not_Sig		0.468687
K562_RS06430	K562_RS06430	CP053300	1360050	1360979	No_name	DMT family transporter	EamA-like transporter family	0	1.55652	0.24149	0.128444	DMSO	1.05924	0.202666	0.362944	Amp	7.98451	2.23717	0.0889008	0.669601	Not_Sig		-0.497279
K562_RS06435	K562_RS06435	CP053300	1361038	1361682	No_name	endonuclease III	DNA repair enzyme that has both DNA N-glycosylase activity and AP-lyase activity. The DNA N-glycosylase activity releases various damaged pyrimidines from DNA by cleaving the N- glycosidic bond, leaving an AP (apurinic apyrimidinic) site. The AP-lyase activity cleaves the phosphodiester bond 3' to the AP site by a beta-elimination, leaving a 3'-terminal unsaturated sugar and a product with a term…	nth	0.428446	1.20848	0.467878	DMSO	0.553182	0.906633	0.497586	Amp	1.13102	-0.316318	0.76758	0.972764	Not_Sig		0.124736
K562_RS06440	K562_RS06440	CP053300	1361679	1362686	No_name	electron transport complex subunit RsxB	Part of a membrane complex involved in electron transport	rnfB	-0.628684	1.35953	0.196229	DMSO	-0.383015	2.03275	0.270101	Amp	1.89465	-1.27453	0.271481	0.83512	Not_Sig		0.245669
K562_RS06445	K562_RS06445	CP053300	1362844	1363476	No_name	TetR family transcriptional regulator	PFAM regulatory protein TetR	0	-0.00472858	1.70781	0.206975	DMSO	0.0467581	2.06163	0.657826	Amp	10.1015	-0.129314	0.903351	0.984911	Not_Sig		0.0514866
K562_RS06455	K562_RS06455	CP053300	1365024	1366514	No_name	polyhydroxyalkanoate depolymerase	PFAM PHB de-polymerase domain protein	phaZ1	0.387205	1.32451	0.327423	DMSO	0.15264	1.62826	0.518283	Amp	2.50562	0.662724	0.543745	0.942121	Not_Sig		-0.234565
K562_RS06460	K562_RS06460	CP053300	1366727	1368556	No_name	glycoside hydrolase family 15 protein	PFAM glycoside hydrolase 15-related	0	-0.249527	1.78162	0.166785	DMSO	-0.27084	1.99961	0.181106	Amp	1.17911	0.149938	0.88807	0.984305	Not_Sig		-0.0213131
K562_RS06465	K562_RS06465	CP053300	1368723	1369967	No_name	lactonase family protein	#N/A	#N/A	-0.888916	1.83219	0.239608	DMSO	-0.137744	2.84877	0.571341	Amp	5.68573	-2.10002	0.103651	0.68181	Not_Sig		0.751172
K562_RS06470	K562_RS06470	CP053300	1370065	1374643	No_name	DNA translocase FtsK	#N/A	#N/A	0.27268	1.61701	0.322991	DMSO	0.430682	1.78595	0.236674	Amp	1.86242	-0.683446	0.53186	0.940833	Not_Sig		0.158002
K562_RS06475	K562_RS06475	CP053300	1374821	1375366	No_name	META domain-containing protein	META domain	0	0.22356	2.32914	0.507537	DMSO	1.12671	1.26145	0.27542	Amp	3.39583	-2.70899	0.0535933	0.600285	Not_Sig		0.903154
K562_RS06480	K562_RS06480	CP053300	1375582	1376796	No_name	formate-dependent phosphoribosylglycinamide formyltransferase	Involved in the de novo purine biosynthesis. Catalyzes the transfer of formate to 5-phospho-ribosyl-glycinamide (GAR), producing 5-phospho-ribosyl-N-formylglycinamide (FGAR). Formate is provided by PurU via hydrolysis of 10-formyl-tetrahydrofolate	purT	1.20152	0.396162	0.155472	DMSO	1.33907	0.0852265	0.484532	Amp	9.71274	-0.468198	0.664017	0.960654	Not_Sig		0.137553
K562_RS06485	K562_RS06485	CP053300	1376815	1377000	No_name	hypothetical protein	0	0	-0.821924	2.67869	0.587381	DMSO	0.618508	1.02896	1.10293	Amp	3.5258	-1.99657	0.116572	0.692031	Not_Sig		1.44043
K562_RS06490	K562_RS06490	CP053300	1377095	1377475	No_name	MliC family protein	Membrane-bound lysozyme-inhibitor of c-type lysozyme	0	1.29422	0.0563105	0.17795	DMSO	1.32411	0.146762	0.129111	Amp	1.89963	-0.235456	0.825419	0.977153	Not_Sig		0.0298871
K562_RS06495	K562_RS06495	CP053300	1377857	1379407	No_name	DEAD/DEAH box helicase	Belongs to the DEAD box helicase family	rhlE2	-0.494649	1.90383	0.0698472	DMSO	-0.749212	2.26378	0.49073	Amp	49.3614	NA	NA	NA	Not_tested		-0.254563
K562_RS06500	K562_RS06500	CP053300	1379661	1380557	No_name	tRNA glutamyl-Q(34) synthetase GluQRS	Catalyzes the tRNA-independent activation of glutamate in presence of ATP and the subsequent transfer of glutamate onto a tRNA(Asp). Glutamate is transferred on the 2-amino-5-(4,5- dihydroxy-2-cyclopenten-1-yl) moiety of the queuosine in the wobble position of the QUC anticodon	gluQ	-0.936245	2.3213	1.15883	DMSO	0.990568	0.30695	0.654408	Amp	3.13575	-2.50769	0.0662202	0.626602	Not_Sig		1.92681
K562_RS06505	K562_RS06505	CP053300	1380583	1381437	No_name	sulfurtransferase	Belongs to the UPF0176 family	0	0.345594	1.46585	0.475995	DMSO	0.410645	1.05211	0.327651	Amp	2.11048	-0.19498	0.854912	0.981647	Not_Sig		0.0650511
K562_RS06520	K562_RS06520	CP053300	1387040	1388104	No_name	glycosyltransferase family 4 protein	glycosyl transferase	lgtG	-1.08461	1.46585	2.39663	DMSO	-1.36769	1.05211	0.821416	Amp	8.51288	0.193532	0.855973	0.981647	Not_Sig		-0.283081
K562_RS06525	K562_RS06525	CP053300	1388367	1389497	No_name	glycosyltransferase family 9 protein	Glycosyltransferase family 9 (heptosyltransferase)	0	-2.29146	1.26585	1.68849	DMSO	-4.04026	1.05211	3.40562	Amp	2.93322	0.768073	0.485277	0.930054	Not_Sig		-1.7488
K562_RS06535	K562_RS06535	CP053300	1390777	1392019	No_name	glycosyltransferase	#N/A	#N/A	-0.500827	1.56795	0.371296	DMSO	-0.338553	1.70107	0.568068	Amp	2.34078	-0.414156	0.700005	0.963803	Not_Sig		0.162273
K562_RS06540	K562_RS06540	CP053300	1392057	1393271	No_name	glycosyltransferase family 9 protein	PFAM glycosyl transferase family 9	wabP	-1.00327	1.15363	0.154555	DMSO	-0.139086	1.59008	0.124057	Amp	1.55211	-0.913959	0.156	0.577017	Not_Sig		0.864181
K562_RS06545	K562_RS06545	CP053300	1393306	1394076	No_name	glycosyltransferase family 2 protein	glycosyl transferase family 2	lgtF	-3.3858	1.09184	0.800776	DMSO	-1.81919	2.00128	1.17837	Amp	2.16542	-0.120285	0.0551686	0.523355	Not_Sig		1.56661
K562_RS06550	K562_RS06550	CP053300	1394219	1394599	No_name	RcnB family protein	#N/A	#N/A	0.296038	1.29917	0.126651	DMSO	-0.346772	2.01008	0.196222	Amp	2.40036	4.76729	0.00885766	0.33254	Sig		-0.64281
K562_RS06555	K562_RS06555	CP053300	1394664	1395230	No_name	FUSC family protein	Aromatic acid exporter family member 1	0	-0.178921	1.33094	0.0674105	DMSO	-0.291986	1.87847	0.51648	Amp	58.7019	NA	NA	NA	Not_tested		-0.113065
K562_RS06560	K562_RS06560	CP053300	1395269	1396528	No_name	MFS transporter	Major facilitator Superfamily	0	0.371648	0.723108	0.12188	DMSO	0.388866	1.0364	0.160575	Amp	1.73577	-0.14793	0.889555	0.984353	Not_Sig		0.0172174
K562_RS06565	K562_RS06565	CP053300	1396525	1397489	No_name	PRC-barrel domain-containing protein	#N/A	#N/A	-0.093451	1.59033	0.333714	DMSO	-0.414853	1.80926	0.0799009	Amp	17.444	1.6223	0.180059	0.763216	Not_Sig		-0.321402
K562_RS06570	K562_RS06570	CP053300	1397743	1398894	No_name	collagen-like triple helix repeat-containing protein	#N/A	#N/A	0.83125	0.149361	1.12786	DMSO	0.626623	0.285904	0.291294	Amp	14.9914	0.304262	0.7761	0.972764	Not_Sig		-0.204627
K562_RS06575	K562_RS06575	CP053300	1399350	1399685	No_name	YggL family protein	Protein with unknown function (DUF469)	0	-0.304352	1.27643	0.420133	DMSO	0.389575	0.332396	0.543383	Amp	1.67278	-1.74987	0.155039	0.734483	Not_Sig		0.693927
K562_RS06580	K562_RS06580	CP053300	1399812	1401281	No_name	ribonuclease G	ribonuclease, Rne Rng family	rng	-2.06397	1.33585	0.483683	DMSO	-1.64259	1.79281	0.36663	Amp	1.74047	-1.20252	0.295477	0.846189	Not_Sig		0.421377
K562_RS06585	K562_RS06585	CP053300	1401290	1401937	No_name	septum formation inhibitor Maf	Maf-like protein	maf	0.111712	1.51638	0.520669	DMSO	-0.00084755	1.80239	0.667824	Amp	1.64513	0.230228	0.82921	0.977153	Not_Sig		-0.11256
K562_RS06590	K562_RS06590	CP053300	1401989	1402459	No_name	23S rRNA (pseudouridine(1915)-N(3))-methyltransferase RlmH	Specifically methylates the pseudouridine at position 1915 (m3Psi1915) in 23S rRNA	rlmH	1.19633	0.204897	0.0711609	DMSO	1.05983	0.201912	0.183862	Amp	6.67579	1.19926	0.29661	0.846189	Not_Sig		-0.136507
K562_RS06595	K562_RS06595	CP053300	1402478	1402921	No_name	ribosome silencing factor	Functions as a ribosomal silencing factor. Interacts with ribosomal protein L14 (rplN), blocking formation of intersubunit bridge B8. Prevents association of the 30S and 50S ribosomal subunits and the formation of functional ribosomes, thus repressing translation	rsfS	-0.212713	1.2472	0.0914985	DMSO	0.344589	1.03024	0.497486	Amp	29.562	-1.9083	0.128999	0.703306	Not_Sig		0.557302
K562_RS06600	K562_RS06600	CP053300	1402926	1403651	No_name	nicotinate-nucleotide adenylyltransferase	#N/A	#N/A	-0.713792	2.09041	0.337146	DMSO	-0.0824057	1.86145	0.594886	Amp	3.11338	-1.59933	0.184994	0.763568	Not_Sig		0.631387
K562_RS06605	K562_RS06605	CP053300	1403667	1404590	No_name	oxygen-dependent coproporphyrinogen oxidase	Involved in the heme biosynthesis. Catalyzes the aerobic oxidative decarboxylation of propionate groups of rings A and B of coproporphyrinogen-III to yield the vinyl groups in protoporphyrinogen-IX	hemF	-2.36633	1.00614	0.235893	DMSO	-2.38637	1.09506	0.294678	Amp	1.56051	0.0919552	0.931155	0.990797	Not_Sig		-0.0200398
K562_RS06610	K562_RS06610	CP053300	1404709	1405989	No_name	phosphoribosylamine--glycine ligase	Belongs to the GARS family	purD	-2.47733	1.14007	0.895129	DMSO	-2.20568	1.41361	0.12923	Amp	47.9782	NA	NA	NA	Not_tested		0.271645
K562_RS06615	K562_RS06615	CP053300	1406094	1406822	No_name	YebC/PmpR family DNA-binding transcriptional regulator	transcriptional regulatory protein	0	-1.3447	1.02936	1.30939	DMSO	-1.12527	1.05557	1.41379	Amp	1.16583	-0.197237	0.853259	0.981647	Not_Sig		0.219437
K562_RS06620	K562_RS06620	CP053300	1407041	1407691	No_name	uracil phosphoribosyltransferase	Catalyzes the conversion of uracil and 5-phospho-alpha- D-ribose 1-diphosphate (PRPP) to UMP and diphosphate	upp	0.178571	1.38662	0.469142	DMSO	0.167908	1.74506	0.133868	Amp	12.2817	0.0378572	0.971616	0.997164	Not_Sig		-0.0106633
K562_RS06625	K562_RS06625	CP053300	1407900	1408679	No_name	SDR family oxidoreductase	PFAM short-chain dehydrogenase reductase SDR	0	-0.815779	2.10772	0.659034	DMSO	-0.00908819	1.61436	0.556954	Amp	1.40016	-1.6193	0.180695	0.763216	Not_Sig		0.80669
K562_RS06630	K562_RS06630	CP053300	1408735	1409127	No_name	methylglyoxal synthase	methylglyoxal synthase	mgsA	0.216588	0.613993	1.17132	DMSO	0.0500864	0.089825	0.498693	Amp	5.51678	0.226533	0.831893	0.978873	Not_Sig		-0.166502
K562_RS06635	K562_RS06635	CP053300	1409300	1410274	No_name	quinone oxidoreductase	PFAM Alcohol dehydrogenase zinc-binding domain protein	qor	0.387123	0.925813	0.418087	DMSO	0.428502	0.844911	0.138137	Amp	9.16038	-0.162772	0.87859	0.982599	Not_Sig		0.0413793
K562_RS06645	K562_RS06645	CP053300	1410670	1412475	No_name	potassium-transporting ATPase subunit KdpA	Part of the high-affinity ATP-driven potassium transport (or Kdp) system, which catalyzes the hydrolysis of ATP coupled with the electrogenic transport of potassium into the cytoplasm. This subunit binds and transports the potassium across the cytoplasmic membrane	kdpA	-0.145136	1.81146	0.705215	DMSO	0.0969969	1.42453	0.331667	Amp	4.52103	-0.538147	0.619023	0.955832	Not_Sig		0.242133
K562_RS06650	K562_RS06650	CP053300	1412530	1414614	No_name	potassium-transporting ATPase subunit KdpB	Part of the high-affinity ATP-driven potassium transport (or Kdp) system, which catalyzes the hydrolysis of ATP coupled with the electrogenic transport of potassium into the cytoplasm. This subunit is responsible for energy coupling to the transport system	kdpB	-0.254174	1.76114	0.464897	DMSO	-0.104592	1.69404	0.214641	Amp	4.69123	-0.505969	0.639489	0.960003	Not_Sig		0.149582
K562_RS06655	K562_RS06655	CP053300	1414640	1415221	No_name	potassium-transporting ATPase subunit KdpC	Part of the high-affinity ATP-driven potassium transport (or Kdp) system, which catalyzes the hydrolysis of ATP coupled with the electrogenic transport of potassium into the cytoplasm. This subunit acts as a catalytic chaperone that increases the ATP- binding affinity of the ATP-hydrolyzing subunit KdpB by the formation of a transient KdpB KdpC ATP ternary complex	kdpC	-1.02644	1.71692	0.519658	DMSO	-1.04038	2.09915	0.562574	Amp	1.17199	0.0315309	0.976357	0.997585	Not_Sig		-0.0139419
K562_RS06660	K562_RS06660	CP053300	1415374	1418217	No_name	DUF4118 domain-containing protein	PhoQ Sensor	kdpD	0.0910206	1.73332	0.384391	DMSO	0.107111	2.18277	0.436022	Amp	1.28667	-0.0479459	0.964058	0.995566	Not_Sig		0.0160904
K562_RS06665	K562_RS06665	CP053300	1418210	1418908	No_name	two-component system response regulator KdpE	response regulator	kdpE	-0.61167	2.63883	0.563229	DMSO	-0.568694	2.38766	0.269404	Amp	4.3708	-0.119226	0.910844	0.988311	Not_Sig		0.0429768
K562_RS06670	K562_RS06670	CP053300	1419061	1419342	No_name	DUF333 domain-containing protein	Domain of unknown function (DUF333)	0	0.898397	0.246652	0.221942	DMSO	1.23401	0.00199068	0.0538984	Amp	16.9562	-2.54513	0.063633	0.619067	Not_Sig		0.335608
K562_RS06680	K562_RS06680	CP053300	1420676	1420996	No_name	quaternary ammonium compound efflux SMR transporter SugE	Pfam Small Multidrug Resistance protein	sugE	-0.160466	2.05542	0.516344	DMSO	-0.790232	2.55084	0.633597	Amp	1.50574	1.33455	0.252926	0.827362	Not_Sig		-0.629766
K562_RS06685	K562_RS06685	CP053300	1421214	1421831	No_name	DUF4126 domain-containing protein	Domain of unknown function (DUF4126)	0	0.395391	0.252822	0.423134	DMSO	-0.233476	0.860007	1.24233	Amp	8.62024	0.829945	0.453231	0.921271	Not_Sig		-0.628868
K562_RS06690	K562_RS06690	CP053300	1421828	1424443	No_name	FtsX-like permease family protein	abc transporter, permease	0	0.424283	1.30319	0.0656959	DMSO	0.294312	1.26998	0.183454	Amp	7.79788	1.15525	0.312298	0.861842	Not_Sig		-0.12997
K562_RS06695	K562_RS06695	CP053300	1424487	1424897	No_name	group II truncated hemoglobin	PFAM globin	0	1.04856	0.0989826	0.312845	DMSO	0.829435	0.626197	0.529727	Amp	2.86712	0.61692	0.570671	0.948571	Not_Sig		-0.219124
K562_RS06700	K562_RS06700	CP053300	1425007	1425738	No_name	alanyl-tRNA editing protein	Threonyl alanyl tRNA synthetase	0	-0.0637436	1.31413	0.254224	DMSO	-0.330995	1.77935	0.497406	Amp	3.82816	0.828654	0.453881	0.921271	Not_Sig		-0.267251
K562_RS06705	K562_RS06705	CP053300	1425735	1426352	No_name	DUF924 domain-containing protein	Bacterial protein of unknown function (DUF924)	0	0.0381323	1.90614	0.620569	DMSO	-0.0966621	1.47344	0.304162	Amp	4.16265	0.337824	0.752481	0.969845	Not_Sig		-0.134794
K562_RS06710	K562_RS06710	CP053300	1426524	1428416	No_name	glycosyl transferase	4-amino-4-deoxy-L-arabinose transferase and related glycosyltransferases of PMT family	0	-0.417222	2.86573	0.396478	DMSO	-0.160772	2.39525	0.532728	Amp	1.8054	-0.668877	0.540197	0.942121	Not_Sig		0.25645
K562_RS06715	K562_RS06715	CP053300	1428645	1429406	No_name	SDR family oxidoreductase	Short-chain dehydrogenase reductase sdr	0	-2.13015	1.85657	0.166548	DMSO	-1.32483	2.48781	0.612285	Amp	13.5154	-2.19822	0.0928363	0.672835	Not_Sig		0.805314
K562_RS06720	K562_RS06720	CP053300	1429429	1430010	No_name	TIGR00730 family Rossman fold protein	Belongs to the LOG family	0	1.31383	0.10413	0.394213	DMSO	-0.249008	2.21943	0.881831	Amp	5.0039	2.80237	0.0486937	0.579426	Sig		-1.56283
K562_RS06725	K562_RS06725	CP053300	1430007	1430765	No_name	TetR/AcrR family transcriptional regulator	PFAM regulatory protein TetR	0	0.334726	0.967992	0.292166	DMSO	0.686762	0.582173	0.378625	Amp	1.67941	-1.27496	0.271345	0.83512	Not_Sig		0.352036
K562_RS06730	K562_RS06730	CP053300	1430967	1431500	No_name	diacylglycerol kinase	Recycling of diacylglycerol produced during the turnover of membrane phospholipid	dgkA	1.3732	0.202664	0.604778	DMSO	0.879127	0.08757	0.297036	Amp	4.14546	1.27007	0.272914	0.83512	Not_Sig		-0.494069
K562_RS06735	K562_RS06735	CP053300	1431497	1432531	No_name	glycosyltransferase family 1 protein	glycosyl transferase group 1	0	-0.243959	1.74607	0.432424	DMSO	-0.396611	1.77189	0.404571	Amp	1.14243	0.446493	0.678347	0.963653	Not_Sig		-0.152652
K562_RS06740	K562_RS06740	CP053300	1432560	1433498	No_name	UDP-2	PFAM metallophosphoesterase	0	-0.337677	2.12663	0.479038	DMSO	-0.553423	2.28642	0.113479	Amp	17.82	0.759063	0.490086	0.930054	Not_Sig		-0.215746
K562_RS06745	K562_RS06745	CP053300	1433725	1434231	No_name	RDD family protein	PFAM RDD domain containing protein	0	0.302545	1.54551	0.291994	DMSO	1.01693	0.238433	0.468919	Amp	2.57898	-2.23995	0.0886271	0.669601	Not_Sig		0.714382
K562_RS06750	K562_RS06750	CP053300	1434238	1435005	No_name	DUF3106 domain-containing protein	Protein of unknown function (DUF3106)	0	0.976197	1.54551	0.275007	DMSO	0.649116	0.238433	0.229768	Amp	1.43254	1.58087	0.189063	0.763838	Not_Sig		-0.327081
K562_RS06755	K562_RS06755	CP053300	1435032	1435451	No_name	DUF3619 family protein	Protein of unknown function (DUF3619)	0	-2.86717	1.54551	2.16351	DMSO	-4.33218	0.238433	0.480223	Amp	20.2969	1.14498	0.316071	0.863424	Not_Sig		-1.465
K562_RS06760	K562_RS06760	CP053300	1435448	1436011	No_name	RNA polymerase sigma factor	RNA polymerase	0	-0.375537	1.79474	0.55047	DMSO	-0.148635	1.81284	0.49287	Amp	1.24739	-0.531898	0.622966	0.956191	Not_Sig		0.226903
K562_RS06765	K562_RS06765	CP053300	1436366	1438129	No_name	acetolactate synthase 3 catalytic subunit	acetolactate synthase	ilvI	-0.66682	1.55054	0.705171	DMSO	-0.871692	1.23824	0.128381	Amp	30.1708	0.495071	0.646512	0.960643	Not_Sig		-0.204871
K562_RS06770	K562_RS06770	CP053300	1438241	1438732	No_name	acetolactate synthase small subunit	Acetolactate synthase, small subunit	ilvH	0.315842	1.3869	0.5727	DMSO	0.53405	0.286809	0.197052	Amp	8.44676	-0.624033	0.566431	0.948418	Not_Sig		0.218208
K562_RS06775	K562_RS06775	CP053300	1438838	1439854	No_name	ketol-acid reductoisomerase	Involved in the biosynthesis of branched-chain amino acids (BCAA). Catalyzes an alkyl-migration followed by a ketol- acid reduction of (S)-2-acetolactate (S2AL) to yield (R)-2,3- dihydroxy-isovalerate. In the isomerase reaction, S2AL is rearranged via a Mg-dependent methyl migration to produce 3- hydroxy-3-methyl-2-ketobutyrate (HMKB). In the reductase reaction, this 2-ketoacid undergoes a metal-…	ilvC	-0.262136	2.01587	0.646276	DMSO	0.778389	1.13529	1.48355	Amp	5.26945	-1.11373	0.327803	0.87247	Not_Sig		1.04053
K562_RS06790	K562_RS06790	CP053300	1441838	1443382	No_name	2-isopropylmalate synthase	Catalyzes the condensation of the acetyl group of acetyl-CoA with 3-methyl-2-oxobutanoate (2-oxoisovalerate) to form 3-carboxy-3-hydroxy-4-methylpentanoate (2-isopropylmalate)	leuA	0.144571	1.41603	0.407827	DMSO	0.119651	1.21518	0.404202	Amp	1.01802	0.0751692	0.943689	0.994933	Not_Sig		-0.0249196
K562_RS06795	K562_RS06795	CP053300	1443454	1445004	No_name	SulP family inorganic anion transporter	sulphate transporter	0	-0.0324106	2.03453	0.690543	DMSO	-0.559136	1.56311	0.163702	Amp	17.794	1.28553	0.267987	0.834584	Not_Sig		-0.526725
K562_RS06800	K562_RS06800	CP053300	1445045	1445686	No_name	carbonic anhydrase	Reversible hydration of carbon dioxide	0	-0.283107	1.18362	0.991415	DMSO	-0.280287	2.19817	0.788728	Amp	1.58	-0.00385574	0.997108	0.999673	Not_Sig		0.00282023
K562_RS06805	K562_RS06805	CP053300	1446070	1446582	No_name	hypothetical protein	Part of the outer membrane protein assembly complex, which is involved in assembly and insertion of beta-barrel proteins into the outer membrane	0	-0.239073	1.78655	0.205408	DMSO	-0.251688	1.92913	0.217844	Amp	1.12475	0.0729725	0.945331	0.995107	Not_Sig		-0.0126145
K562_RS06810	K562_RS06810	CP053300	1446748	1448007	No_name	branched-chain amino acid ABC transporter substrate-binding protein	abc transporter	0	0.285465	1.5506	0.26155	DMSO	0.434016	1.0096	0.429661	Amp	2.69863	-0.511516	0.635933	0.959237	Not_Sig		0.14855
K562_RS06815	K562_RS06815	CP053300	1448115	1448384	No_name	30S ribosomal protein S15	Forms an intersubunit bridge (bridge B4) with the 23S rRNA of the 50S subunit in the ribosome	rpsO	-1.91822	1.5506	2.43995	DMSO	-1.39451	1.0096	3.53088	Amp	2.09414	-0.211351	0.842945	0.981647	Not_Sig		0.523713
K562_RS06820	K562_RS06820	CP053300	1448675	1450822	No_name	polyribonucleotide nucleotidyltransferase	Involved in mRNA degradation. Catalyzes the phosphorolysis of single-stranded polyribonucleotides processively in the 3'- to 5'-direction	pnp	-2.59928	1.5506	2.09879	DMSO	-0.283513	1.0096	0.334851	Amp	39.2857	NA	NA	NA	Not_tested		2.31577
K562_RS06825	K562_RS06825	CP053300	1450971	1451990	No_name	NAD(P)H-quinone oxidoreductase	nadph quinone oxidoreductase	0	0.411786	1.52243	0.695071	DMSO	0.589122	1.35833	0.918813	Amp	1.74742	-0.266605	0.802953	0.975414	Not_Sig		0.177337
K562_RS06855	K562_RS06855	CP053300	1454609	1455211	No_name	NADH-quinone oxidoreductase subunit C	NDH-1 shuttles electrons from NADH, via FMN and iron- sulfur (Fe-S) centers, to quinones in the respiratory chain. The immediate electron acceptor for the enzyme in this species is believed to be ubiquinone. Couples the redox reaction to proton translocation (for every two electrons transferred, four hydrogen ions are translocated across the cytoplasmic membrane), and thus conserves the redox ene…	nuoC	-1.11808	1.52243	0.780077	DMSO	0.264681	1.35833	0.941958	Amp	1.4581	-1.95826	0.121797	0.699984	Not_Sig		1.38276
K562_RS06890	K562_RS06890	CP053300	1462525	1463175	No_name	NADH-quinone oxidoreductase subunit J	Belongs to the complex I subunit 6 family	nuoJ	0.0342736	0.18376	0.252885	DMSO	0.393091	0.104468	0.207006	Amp	1.49239	-1.90171	0.129982	0.703306	Not_Sig		0.358818
K562_RS06895	K562_RS06895	CP053300	1463194	1463499	No_name	NADH-quinone oxidoreductase subunit NuoK	NDH-1 shuttles electrons from NADH, via FMN and iron- sulfur (Fe-S) centers, to quinones in the respiratory chain. The immediate electron acceptor for the enzyme in this species is believed to be ubiquinone. Couples the redox reaction to proton translocation (for every two electrons transferred, four hydrogen ions are translocated across the cytoplasmic membrane), and thus conserves the redox ene…	nuoK	-2.0553	0.72184	0.877643	DMSO	-0.730427	0.877706	1.35405	Amp	2.38032	-1.42212	0.228058	0.800436	Not_Sig		1.32487
K562_RS06915	K562_RS06915	CP053300	1468569	1468865	No_name	DUF2818 family protein	Protein of unknown function (DUF2818)	0	-0.439822	1.47909	0.415943	DMSO	-0.589172	1.16954	0.714288	Amp	2.94903	0.312958	0.769951	0.972764	Not_Sig		-0.14935
K562_RS06920	K562_RS06920	CP053300	1468905	1469495	No_name	NUDIX hydrolase	PFAM NUDIX hydrolase	0	-0.0538726	1.89822	0.447858	DMSO	0.18067	2.05824	0.175147	Amp	6.53844	-0.84477	0.445805	0.918639	Not_Sig		0.234543
K562_RS06925	K562_RS06925	CP053300	1469632	1470054	No_name	DUF1178 family protein	Protein of unknown function (DUF1178)	0	0.422427	0.0535533	0.111304	DMSO	0.183838	1.14434	0.321852	Amp	8.36155	1.21346	0.291706	0.84589	Not_Sig		-0.238589
K562_RS06930	K562_RS06930	CP053300	1470109	1471305	No_name	acyl-CoA dehydrogenase family protein	acyl-CoA dehydrogenase	0	-0.335398	1.99776	0.0323225	DMSO	0.459697	0.74022	0.425261	Amp	173.102	NA	NA	NA	Not_tested		0.795095
K562_RS06935	K562_RS06935	CP053300	1471325	1472458	No_name	acyl-CoA dehydrogenase family protein	acyl-CoA dehydrogenase	0	0.464005	0.905915	0.499985	DMSO	0.283833	1.10171	0.399468	Amp	1.56657	0.487628	0.651333	0.960654	Not_Sig		-0.180172
K562_RS06940	K562_RS06940	CP053300	1472497	1472958	No_name	MaoC family dehydratase	N-terminal half of MaoC dehydratase	0	-0.347623	2.48652	0.470057	DMSO	-0.614389	2.55808	0.535673	Amp	1.29867	0.64834	0.552104	0.943753	Not_Sig		-0.266766
K562_RS06945	K562_RS06945	CP053300	1472955	1473431	No_name	MaoC family dehydratase	PFAM MaoC domain protein dehydratase	0	-0.0212031	2.09899	0.672215	DMSO	-0.465461	2.10619	1.22962	Amp	3.34601	0.549087	0.612157	0.955832	Not_Sig		-0.444257
K562_RS06950	K562_RS06950	CP053300	1473479	1474171	No_name	glutathione S-transferase N-terminal domain-containing protein	Belongs to the GST superfamily	gstI	-0.586285	2.63918	0.77694	DMSO	-0.274315	2.62408	0.239607	Amp	10.5142	-0.664597	0.542664	0.942121	Not_Sig		0.311971
K562_RS06955	K562_RS06955	CP053300	1474392	1475183	No_name	enoyl-CoA hydratase	Belongs to the enoyl-CoA hydratase isomerase family	0	0.593379	1.67685	0.400752	DMSO	0.531	0.983016	0.57046	Amp	2.02628	0.154977	0.884345	0.982962	Not_Sig		-0.0623787
K562_RS06960	K562_RS06960	CP053300	1475386	1476042	No_name	glutathione S-transferase	glutathione s-transferase	0	-1.20918	1.86216	0.767975	DMSO	-1.31829	2.36663	0.19053	Amp	16.2468	0.238839	0.822968	0.977153	Not_Sig		-0.10911
K562_RS06965	K562_RS06965	CP053300	1476082	1477254	No_name	pyridoxal phosphate-dependent aminotransferase	Aminotransferase	ybdL	-0.360301	1.64129	0.228725	DMSO	-0.222128	1.82182	0.257023	Amp	1.26274	-0.695589	0.524983	0.940778	Not_Sig		0.138173
K562_RS06970	K562_RS06970	CP053300	1477288	1477785	No_name	putative toxin-antitoxin system toxin component	PIN domain	0	-0.572998	1.80331	0.767108	DMSO	0.016019	2.20332	1.46816	Amp	3.66296	-0.615887	0.571288	0.948571	Not_Sig		0.589017
K562_RS06975	K562_RS06975	CP053300	1477843	1478625	No_name	peroxide stress protein YaaA	Belongs to the UPF0246 family	0	-0.673752	1.80557	0.569932	DMSO	-0.947565	1.99489	0.133387	Amp	18.2567	0.810237	0.463253	0.924318	Not_Sig		-0.273813
K562_RS06980	K562_RS06980	CP053300	1478765	1479919	No_name	carboxypeptidase family protein	PFAM peptidase M14, carboxypeptidase A	0	0.343059	1.2447	0.208665	DMSO	0.360996	1.12034	0.284646	Amp	1.86085	-0.0880271	0.934086	0.991734	Not_Sig		0.0179371
K562_RS06985	K562_RS06985	CP053300	1480007	1480663	No_name	hypothetical protein	0	0	0.526115	1.58283	0.0482247	DMSO	0.165661	2.10151	0.300753	Amp	38.8938	2.04969	0.109729	0.683949	Not_Sig		-0.360454
K562_RS06990	K562_RS06990	CP053300	1480806	1481480	No_name	energy-coupling factor ABC transporter permease	membrane	0	0.291294	1.5475	0.491377	DMSO	0.228802	1.31763	0.197325	Amp	6.20106	0.20441	0.848013	0.981647	Not_Sig		-0.0624914
K562_RS06995	K562_RS06995	CP053300	1481557	1482393	No_name	response regulator transcription factor	PFAM regulatory protein LuxR	0	0.769099	0.430921	0.334023	DMSO	0.0698898	1.56252	0.325156	Amp	1.05528	2.598	0.0601744	0.609152	Not_Sig		-0.699209
K562_RS07030	K562_RS07030	CP053300	1489838	1490242	No_name	Cu(I)-responsive transcriptional regulator	Transcriptional regulator	cueR	0.868531	0.612205	0.821031	DMSO	0.641311	0.722404	0.442031	Amp	3.44997	0.422062	0.694677	0.963653	Not_Sig		-0.22722
K562_RS07035	K562_RS07035	CP053300	1490458	1490604	No_name	DUF3563 family protein	#N/A	#N/A	-1.39511	1.48828	2.14033	DMSO	0.829684	0.0329104	0.321067	Amp	44.4394	NA	NA	NA	Not_tested		2.2248
K562_RS07040	K562_RS07040	CP053300	1490718	1491086	No_name	hypothetical protein	0	0	1.08493	0.0955508	0.390581	DMSO	0.951167	0.106766	0.160897	Amp	5.89282	0.548448	0.612557	0.955832	Not_Sig		-0.133759
K562_RS07045	K562_RS07045	CP053300	1491102	1491947	No_name	23S rRNA (adenine(2030)-N(6))-methyltransferase RlmJ	Specifically methylates the adenine in position 2030 of 23S rRNA	rlmJ	-0.522944	1.61982	0.112769	DMSO	-0.561854	2.15222	0.0875513	Amp	1.65904	0.472059	0.661485	0.960654	Not_Sig		-0.0389099
K562_RS07050	K562_RS07050	CP053300	1492049	1493020	No_name	aldo/keto reductase	aldo keto reductase	0	0.0991385	1.52301	0.257545	DMSO	-0.181032	1.70913	0.357904	Amp	1.93119	1.10054	0.332873	0.877278	Not_Sig		-0.280171
K562_RS07060	K562_RS07060	CP053300	1494093	1495292	No_name	aspartate/tyrosine/aromatic aminotransferase	PFAM aminotransferase class I and II	aspC	0.0847302	1.62461	0.278565	DMSO	-0.160305	1.96815	0.237213	Amp	1.37904	1.15998	0.310577	0.859165	Not_Sig		-0.245035
K562_RS07065	K562_RS07065	CP053300	1495551	1497641	No_name	excinuclease ABC subunit UvrB	damaged site, the DNA wraps around one UvrB monomer. DNA wrap is dependent on ATP binding by UvrB and probably causes local melting of the DNA helix, facilitating insertion of UvrB beta-hairpin between the DNA strands. Then UvrB probes one DNA strand for the presence of a lesion. If a lesion is found the UvrA subunits dissociate and the UvrB-DNA preincision complex is formed. This complex is subs…	uvrB	-0.828187	1.63714	0.139781	DMSO	-0.959401	1.45152	0.178175	Amp	1.62479	1.00357	0.372371	0.891239	Not_Sig		-0.131215
K562_RS07070	K562_RS07070	CP053300	1497869	1498420	No_name	iron transporter	ferrous iron transport protein	0	-0.210884	1.59859	0.393235	DMSO	-0.511287	1.61637	0.226912	Amp	3.00324	1.14604	0.315677	0.863424	Not_Sig		-0.300403
K562_RS07075	K562_RS07075	CP053300	1498476	1498808	No_name	cupredoxin domain-containing protein	Cupredoxin-like domain	0	0.741178	0.760795	1.33076	DMSO	1.7811	0.567511	0.929911	Amp	2.04793	-1.10947	0.329432	0.873394	Not_Sig		1.03992
K562_RS07080	K562_RS07080	CP053300	1498867	1499709	No_name	FTR1 family protein	Iron permease	0	0.231556	1.17074	0.107871	DMSO	-0.0515936	1.23861	0.25418	Amp	5.55228	1.77613	0.150362	0.728616	Not_Sig		-0.283149
K562_RS07085	K562_RS07085	CP053300	1499706	1501103	No_name	4Fe-4S binding protein	4Fe-4S binding domain	0	-0.0457142	1.2782	0.287017	DMSO	0.00633182	1.607	0.389606	Amp	1.84262	-0.186286	0.861286	0.981699	Not_Sig		0.052046
K562_RS07090	K562_RS07090	CP053300	1501380	1501625	No_name	hemin uptake protein HemP	Hemin uptake protein HemP	0	0.754015	0.647178	0.147422	DMSO	0.748306	0.708482	0.326174	Amp	4.89529	0.0276256	0.979284	0.997585	Not_Sig		-0.00570906
K562_RS07095	K562_RS07095	CP053300	1501766	1502248	No_name	DUF1857 family protein	Domain of unknown function (DUF1857)	0	-0.00263129	1.62687	0.203309	DMSO	-0.305517	1.44595	0.358029	Amp	3.10114	1.27418	0.271596	0.83512	Not_Sig		-0.302886
K562_RS07100	K562_RS07100	CP053300	1502347	1503219	No_name	pirin family protein	Belongs to the pirin family	0	0.78622	0.80099	0.0904491	DMSO	0.331741	0.735067	0.0800508	Amp	1.27667	6.51716	0.00286186	0.2238	Sig		-0.454479
K562_RS07105	K562_RS07105	CP053300	1503341	1504315	No_name	LysR family transcriptional regulator	Transcriptional regulator, LysR family	0	0.0674424	1.27509	0.771874	DMSO	-0.444795	1.85683	0.543098	Amp	2.01993	0.94006	0.400412	0.909035	Not_Sig		-0.512238
K562_RS07115	K562_RS07115	CP053300	1505163	1505897	No_name	MotA/TolQ/ExbB proton channel family protein	MotA TolQ ExbB proton channel	exbB1	-0.0482431	1.27509	0.416275	DMSO	-0.223513	1.85683	0.330158	Amp	1.58971	0.571374	0.598319	0.951597	Not_Sig		-0.17527
K562_RS07125	K562_RS07125	CP053300	1506883	1507119	No_name	(2Fe-2S)-binding protein	PFAM BFD domain protein 2Fe-2S -binding domain protein	0	-0.0338286	1.94198	0.366082	DMSO	0.333744	1.53834	0.66961	Amp	3.3457	-0.834249	0.451065	0.920496	Not_Sig		0.367573
K562_RS07130	K562_RS07130	CP053300	1507272	1508129	No_name	glutamate racemase	Provides the (R)-glutamate required for cell wall biosynthesis	murI	-0.176041	1.80313	0.530345	DMSO	-0.608132	2.26156	0.286363	Amp	3.4299	1.24171	0.282178	0.842647	Not_Sig		-0.432091
K562_RS07135	K562_RS07135	CP053300	1508164	1508640	No_name	bacterioferritin	Iron-storage protein	bfr	-0.541403	2.21518	0.440957	DMSO	-0.29196	1.34362	0.420908	Amp	1.09754	-0.708745	0.517604	0.939537	Not_Sig		0.249443
K562_RS07140	K562_RS07140	CP053300	1508835	1510358	No_name	fumarate hydratase	Catalyzes the reversible hydration of fumarate to (S)- malate	fumA	0.11397	1.10546	0.290015	DMSO	-0.0481239	1.1036	0.0565697	Amp	26.283	0.950162	0.395834	0.905668	Not_Sig		-0.162094
K562_RS07145	K562_RS07145	CP053300	1510403	1510987	No_name	TIGR00645 family protein	UPF0114 protein	0	0.66884	1.07701	0.652454	DMSO	0.470163	1.17823	0.481634	Amp	1.83512	0.424331	0.693152	0.963653	Not_Sig		-0.198677
K562_RS07150	K562_RS07150	CP053300	1511100	1512008	No_name	DMT family transporter	Multidrug DMT transporter permease	0	0.734237	0.994444	0.167535	DMSO	1.03603	0.353744	0.285344	Amp	2.90088	-1.57975	0.189312	0.763838	Not_Sig		0.301797
K562_RS07155	K562_RS07155	CP053300	1512328	1514310	No_name	acetate--CoA ligase	Catalyzes the conversion of acetate into acetyl-CoA (AcCoA), an essential intermediate at the junction of anabolic and catabolic pathways. AcsA undergoes a two-step reaction. In the first half reaction, AcsA combines acetate with ATP to form acetyl-adenylate (AcAMP) intermediate. In the second half reaction, it can then transfer the acetyl group from AcAMP to the sulfhydryl group of CoA, forming …	acsA	0.236195	1.85741	0.461883	DMSO	-0.0492579	1.67409	0.294227	Amp	2.46433	0.902823	0.417672	0.915703	Not_Sig		-0.285453
K562_RS07160	K562_RS07160	CP053300	1514394	1514738	No_name	DUF4212 domain-containing protein	solute symporter protein	0	-0.18942	1.82788	0.514557	DMSO	-0.523681	2.07375	0.0600319	Amp	73.4689	NA	NA	NA	Not_tested		-0.33426
K562_RS07165	K562_RS07165	CP053300	1514742	1516757	No_name	cation acetate symporter	Belongs to the sodium solute symporter (SSF) (TC 2.A.21) family	0	0.281879	1.29924	0.175786	DMSO	0.120276	1.32391	0.173251	Amp	1.02949	1.13407	0.320121	0.865299	Not_Sig		-0.161602
K562_RS07175	K562_RS07175	CP053300	1516981	1519161	No_name	TonB-dependent siderophore receptor	siderophore receptor	fcuA	0.0587176	1.55013	0.0641433	DMSO	-0.0363466	1.58269	0.361489	Amp	31.7605	0.448488	0.677023	0.963653	Not_Sig		-0.0950642
K562_RS07180	K562_RS07180	CP053300	1519509	1520138	No_name	LysE family translocator	LysE type translocator	0	-0.26023	1.64014	0.540105	DMSO	-0.156959	1.38216	0.419859	Amp	1.65481	-0.261468	0.806643	0.975481	Not_Sig		0.103271
K562_RS07185	K562_RS07185	CP053300	1520556	1523279	No_name	type VI secretion system tip protein VgrG	#N/A	#N/A	0.272842	1.70638	0.109889	DMSO	0.461435	1.27867	0.125494	Amp	1.30417	-1.95827	0.121795	0.699984	Not_Sig		0.188593
K562_RS07190	K562_RS07190	CP053300	1523318	1524577	No_name	IS256-like element IS1356 family transposase	PFAM transposase mutator type	0	-0.224794	1.6811	0.173616	DMSO	-0.0772974	1.62455	0.293835	Amp	2.86435	-0.748541	0.495747	0.930894	Not_Sig		0.147497
K562_RS07195	K562_RS07195	CP053300	1524720	1526981	No_name	DUF3274 domain-containing protein	Alpha beta hydrolase	0	-0.147781	1.64226	0.279275	DMSO	-0.159279	1.73637	0.299336	Amp	1.14883	0.0486476	0.963532	0.995566	Not_Sig		-0.0114983
K562_RS07200	K562_RS07200	CP053300	1526978	1528459	No_name	hypothetical protein	#N/A	#N/A	-0.143846	1.73212	0.132016	DMSO	-0.0990306	1.75089	0.128325	Amp	1.05837	-0.42162	0.694974	0.963653	Not_Sig		0.0448158
K562_RS07210	K562_RS07210	CP053300	1528755	1530113	No_name	hypothetical protein	#N/A	#N/A	-0.0471808	1.6235	0.121345	DMSO	-0.0285446	1.60191	0.0950629	Amp	1.62939	-0.209402	0.844367	0.981647	Not_Sig		0.0186362
K562_RS07215	K562_RS07215	CP053300	1530123	1530386	No_name	PAAR domain-containing protein	#N/A	#N/A	1.46069	1.6235	0.409604	DMSO	1.3754	1.60191	0.30194	Amp	1.8403	0.290316	0.786003	0.973288	Not_Sig		-0.0852929
K562_RS07220	K562_RS07220	CP053300	1530409	1531770	No_name	hypothetical protein	Evidence 4 Homologs of previously reported genes of	0	0.207701	1.47056	0.0556301	DMSO	0.544623	0.773346	0.18618	Amp	11.2008	-3.00321	0.0398156	0.549337	Sig		0.336922
K562_RS07225	K562_RS07225	CP053300	1532116	1533213	No_name	toxic anion resistance protein	Toxic anion resistance protein (TelA)	0	-0.18575	1.61675	0.120207	DMSO	-0.171061	1.58207	0.365275	Amp	9.23386	-0.0661616	0.950424	0.995107	Not_Sig		0.014689
K562_RS07230	K562_RS07230	CP053300	1533234	1533974	No_name	VWA domain-containing protein	vWA found in TerF C terminus	0	0.596878	0.476782	0.579408	DMSO	0.829673	0.311438	0.0467591	Amp	153.546	NA	NA	NA	Not_tested		0.232795
K562_RS07235	K562_RS07235	CP053300	1534018	1535034	No_name	DUF475 domain-containing protein	Protein of unknown function (DUF475)	0	0.120313	1.22599	0.181086	DMSO	-0.0666218	1.33233	0.344775	Amp	3.62497	0.831405	0.452495	0.921271	Not_Sig		-0.186935
K562_RS07240	K562_RS07240	CP053300	1535134	1535790	No_name	TerD family protein	TerD domain	0	-0.404757	1.58466	0.713121	DMSO	-0.875228	2.50298	0.792836	Amp	1.23606	0.764166	0.487357	0.930054	Not_Sig		-0.470471
K562_RS07245	K562_RS07245	CP053300	1535842	1536714	No_name	hypothetical protein	0	0	1.49396	1.58466	0.969067	DMSO	1.91322	2.50298	1.31329	Amp	1.83658	-0.444932	0.679384	0.963653	Not_Sig		0.419261
K562_RS07250	K562_RS07250	CP053300	1536838	1537458	No_name	HAD-IB family hydrolase	TIGRFAM HAD-superfamily hydrolase, subfamily IB (PSPase-like)	0	0.961395	1.58466	0.506638	DMSO	-2.06897	2.50298	1.16774	Amp	5.31246	4.12343	0.0145716	0.402694	Sig		-3.03037
K562_RS07255	K562_RS07255	CP053300	1537488	1538597	No_name	fatty acid desaturase	Fatty acid desaturase	0	0.292495	1.49097	0.340643	DMSO	0.338632	1.29364	0.295817	Amp	1.32603	-0.177124	0.868018	0.981699	Not_Sig		0.0461368
K562_RS07260	K562_RS07260	CP053300	1538824	1539861	No_name	AraC family transcriptional regulator	Arabinose-binding domain of AraC transcription regulator, N-term	0	0.482767	0.555698	0.624791	DMSO	0.567799	0.341537	0.601701	Amp	1.07822	-0.169792	0.873415	0.981699	Not_Sig		0.0850321
K562_RS07265	K562_RS07265	CP053300	1539928	1540974	No_name	beta-propeller fold lactonase family protein	Lactonase, 7-bladed beta-propeller	0	0.721351	0.618303	0.12681	DMSO	0.833657	0.245084	0.460832	Amp	13.2062	-0.40698	0.704859	0.965336	Not_Sig		0.112307
K562_RS07270	K562_RS07270	CP053300	1540961	1542328	No_name	MFS transporter	PFAM major facilitator superfamily MFS_1	0	0.242613	1.48696	0.426909	DMSO	0.0110871	1.78935	0.336673	Amp	1.60789	0.737578	0.501699	0.932226	Not_Sig		-0.231526
K562_RS07275	K562_RS07275	CP053300	1542561	1543748	No_name	helix-turn-helix transcriptional regulator	helix_turn_helix, Lux Regulon	0	-0.113677	0.890411	1.22543	DMSO	-0.569534	1.79156	0.323912	Amp	14.3129	0.622923	0.567091	0.948418	Not_Sig		-0.455857
K562_RS07280	K562_RS07280	CP053300	1543855	1545753	No_name	sulfate adenylyltransferase subunit CysN	Belongs to the TRAFAC class translation factor GTPase superfamily. Classic translation factor GTPase family. CysN NodQ subfamily	cysN	0.518454	1.35325	0.547934	DMSO	1.51172	0.653117	0.676938	Amp	1.5263	-1.97539	0.11943	0.696466	Not_Sig		0.993262
K562_RS07285	K562_RS07285	CP053300	1545753	1546649	No_name	sulfate adenylyltransferase subunit CysD	Sulfate adenylyltransferase	cysD	-0.398899	1.52859	0.40097	DMSO	0.360596	0.514941	0.299245	Amp	1.79543	-2.62926	0.0582314	0.604892	Not_Sig		0.759494
K562_RS07290	K562_RS07290	CP053300	1546864	1547973	No_name	DUF1214 domain-containing protein	Protein of unknown function (DUF1214)	0	1.02824	0.472352	0.308183	DMSO	0.773328	0.773726	0.323323	Amp	1.10066	0.988451	0.378888	0.892983	Not_Sig		-0.254907
K562_RS07295	K562_RS07295	CP053300	1547970	1549163	No_name	sulfotransferase	Sulfotransferase domain	0	1.02178	1.62185	0.69399	DMSO	1.09709	0.673927	0.271175	Amp	6.54946	-0.175089	0.869515	0.981699	Not_Sig		0.0753193
K562_RS07300	K562_RS07300	CP053300	1549205	1549996	No_name	SDR family oxidoreductase	Enoyl-(Acyl carrier protein) reductase	0	0.0749049	2.16803	0.415904	DMSO	0.725458	1.36046	0.36975	Amp	1.26523	-2.02479	0.112881	0.689076	Not_Sig		0.650553
K562_RS07305	K562_RS07305	CP053300	1550014	1550994	No_name	hypothetical protein	hydrolase activity, acting on ester bonds	0	1.53943	2.16803	0.258731	DMSO	1.64996	1.36046	0.147783	Amp	3.06511	-0.6425	0.555523	0.944915	Not_Sig		0.110528
K562_RS07310	K562_RS07310	CP053300	1551069	1551521	No_name	nuclear transport factor 2 family protein	SnoaL-like domain	0	1.71773	2.16803	0.221428	DMSO	1.53357	1.36046	0.18342	Amp	1.45737	1.10935	0.329479	0.873394	Not_Sig		-0.184158
K562_RS07315	K562_RS07315	CP053300	1551535	1552014	No_name	SRPBCC domain-containing protein	Polyketide cyclase / dehydrase and lipid transport	0	0.959079	0.176767	0.331515	DMSO	0.592016	0.504781	0.288932	Amp	1.31649	1.44574	0.221777	0.791543	Not_Sig		-0.367063
K562_RS07320	K562_RS07320	CP053300	1552341	1553819	No_name	deoxyribodipyrimidine photo-lyase	DNA photolyase	phr	1.15734	0.449107	0.260404	DMSO	0.829755	0.237733	0.079545	Amp	10.7169	2.08385	0.105562	0.683949	Not_Sig		-0.327586
K562_RS07325	K562_RS07325	CP053300	1553955	1555124	No_name	MFS transporter	#N/A	#N/A	1.43001	0.0923054	0.204543	DMSO	1.47376	0.0119726	0.326738	Amp	2.55171	-0.196574	0.853744	0.981647	Not_Sig		0.043749
K562_RS07330	K562_RS07330	CP053300	1555347	1556288	No_name	LysR family transcriptional regulator	PFAM regulatory protein LysR	0	0.41509	1.64144	0.605828	DMSO	0.545448	0.485363	0.300955	Amp	4.05225	-0.333777	0.755313	0.971069	Not_Sig		0.130358
K562_RS07335	K562_RS07335	CP053300	1556522	1557565	No_name	alpha/beta hydrolase	Serine aminopeptidase, S33	0	0.463991	1.36839	0.14659	DMSO	0.15274	1.55641	0.255419	Amp	3.03595	1.8306	0.141129	0.719516	Not_Sig		-0.311251
K562_RS07340	K562_RS07340	CP053300	1557694	1558449	No_name	4'-phosphopantetheinyl transferase superfamily protein	Belongs to the P-Pant transferase superfamily	0	0.713327	0.749494	1.52105	DMSO	-3.56881	0.786916	1.949	Amp	1.64186	3.00001	0.0399417	0.549337	Sig		-4.28214
K562_RS07345	K562_RS07345	CP053300	1558471	1559391	No_name	glutamate/aspartate ABC transporter substrate-binding protein	PFAM extracellular solute-binding protein, family 3	0	0.929161	0.185118	0.433522	DMSO	0.387224	0.923486	0.119431	Amp	13.1761	2.08743	0.105135	0.683949	Not_Sig		-0.541936
K562_RS07350	K562_RS07350	CP053300	1559605	1561128	No_name	histidine ammonia-lyase	Histidine ammonia-lyase	hutH	0.0268832	1.22266	0.554445	DMSO	-0.314415	2.29359	0.727483	Amp	1.72159	0.646288	0.553304	0.943753	Not_Sig		-0.341299
K562_RS07355	K562_RS07355	CP053300	1561133	1561828	No_name	histidine utilization repressor	histidine utilization repressor	hutC	1.34973	0.0683618	0.182274	DMSO	1.44198	0.0636686	0.267164	Amp	2.14835	-0.493996	0.647207	0.960645	Not_Sig		0.0922421
K562_RS07360	K562_RS07360	CP053300	1561868	1563556	No_name	urocanate hydratase	Catalyzes the conversion of urocanate to 4-imidazolone- 5-propionate	hutU	0.0655028	1.30795	0.688403	DMSO	-0.324093	2.20977	0.395308	Amp	3.03259	0.850056	0.443182	0.918354	Not_Sig		-0.389596
K562_RS07365	K562_RS07365	CP053300	1563559	1564170	No_name	HutD family protein	HutD	0	1.01679	0.496184	0.358802	DMSO	0.728292	0.460379	0.294328	Amp	1.4861	1.07674	0.342206	0.884321	Not_Sig		-0.288495
K562_RS07370	K562_RS07370	CP053300	1564175	1565398	No_name	imidazolonepropionase	Imidazolone-5-propionate hydrolase	hutI	0.467849	1.08572	0.589867	DMSO	0.606665	0.699977	0.641774	Amp	1.18374	-0.275832	0.796341	0.974972	Not_Sig		0.138816
K562_RS07375	K562_RS07375	CP053300	1565595	1566971	No_name	formimidoylglutamate deiminase	Formiminoglutamate deiminase	hutF	0.114518	2.50993	0.308458	DMSO	0.271412	1.56827	0.483647	Amp	2.45848	-0.473729	0.660392	0.960654	Not_Sig		0.156894
K562_RS07380	K562_RS07380	CP053300	1567031	1567828	No_name	N-formylglutamate deformylase	N-formylglutamate amidohydrolase	hutG	0.0398982	1.29434	0.79601	DMSO	1.10858	0.41154	0.923193	Amp	1.34508	-1.51849	0.203506	0.7772	Not_Sig		1.06868
K562_RS07385	K562_RS07385	CP053300	1568550	1569356	No_name	gamma-glutamyl-gamma-aminobutyrate hydrolase family protein	Pfam Peptidase C26	0	-0.327284	1.49349	0.24653	DMSO	0.5052	0.83781	0.368085	Amp	2.22925	-3.25474	0.0312354	0.499524	Sig		0.832485
K562_RS07390	K562_RS07390	CP053300	1569369	1570706	No_name	glutamine synthetase	glutamine synthetase	0	0.498743	1.28345	0.150169	DMSO	0.603283	1.22491	0.368904	Amp	6.03486	-0.45461	0.672968	0.963653	Not_Sig		0.104541
K562_RS07395	K562_RS07395	CP053300	1570735	1572129	No_name	aspartate aminotransferase family protein	Belongs to the class-III pyridoxal-phosphate-dependent aminotransferase family	0	-0.0703881	3.36722	0.834209	DMSO	1.5166	0.228355	0.753361	Amp	1.22615	-2.44543	0.0707928	0.637243	Not_Sig		1.58699
K562_RS07405	K562_RS07405	CP053300	1572421	1573323	No_name	LysR family transcriptional regulator	Transcriptional regulator	0	0.438153	1.35802	0.14008	DMSO	0.703709	0.851574	0.159419	Amp	1.29516	-2.16737	0.0960925	0.674479	Not_Sig		0.265556
K562_RS07410	K562_RS07410	CP053300	1573497	1575248	No_name	acyl-CoA dehydrogenase family protein	acyl-CoA dehydrogenase	0	-1.36097	2.68454	0.285606	DMSO	-1.15224	2.39832	0.525752	Amp	3.38864	-0.60423	0.578287	0.948571	Not_Sig		0.208725
K562_RS07415	K562_RS07415	CP053300	1575245	1576456	No_name	CoA transferase	PFAM L-carnitine dehydratase bile acid-inducible protein F	0	1.34917	0.351652	0.543117	DMSO	0.850314	0.0824255	0.134621	Amp	16.2765	1.54417	0.197428	0.767647	Not_Sig		-0.498856
K562_RS07420	K562_RS07420	CP053300	1576546	1577958	No_name	MHS family MFS transporter	PFAM General substrate transporter	0	1.21717	0.436028	0.437057	DMSO	1.08488	0.625178	0.311449	Amp	1.96926	0.426972	0.691378	0.963653	Not_Sig		-0.132297
K562_RS07425	K562_RS07425	CP053300	1578220	1578495	No_name	oxidative damage protection protein	Could be a mediator in iron transactions between iron acquisition and iron-requiring processes, such as synthesis and or repair of Fe-S clusters in biosynthetic enzymes	yggX	-1.68748	2.49117	0.827539	DMSO	-1.42102	2.38479	0.377522	Amp	4.805	-0.507382	0.638582	0.959983	Not_Sig		0.266451
K562_RS07430	K562_RS07430	CP053300	1578549	1579928	No_name	amino-acid N-acetyltransferase	Belongs to the acetyltransferase family. ArgA subfamily	argA	0.372551	1.66452	0.556738	DMSO	0.352649	2.17982	0.474607	Amp	1.37604	0.0471192	0.964677	0.995654	Not_Sig		-0.0199021
K562_RS07435	K562_RS07435	CP053300	1579952	1584160	No_name	ATP-dependent RNA helicase HrpA	Atp-dependent helicase	hrpA	0.550162	1.72786	0.106351	DMSO	0.709748	1.37664	0.411129	Amp	14.9444	-0.650895	0.550613	0.943264	Not_Sig		0.159586
K562_RS07440	K562_RS07440	CP053300	1584350	1585339	No_name	beta-propeller fold lactonase family protein	40-residue YVTN family beta-propeller repeat protein	0	0.251341	1.10169	0.32465	DMSO	0.619114	0.549927	0.273176	Amp	1.41237	-1.50133	0.207674	0.777461	Not_Sig		0.367772
K562_RS07445	K562_RS07445	CP053300	1585356	1586330	No_name	sterol desaturase family protein	Fatty acid hydroxylase	0	-0.00149296	1.5128	0.331285	DMSO	0.0862153	1.55745	0.155769	Amp	4.52317	-0.414979	0.699449	0.963803	Not_Sig		0.0877083
K562_RS07450	K562_RS07450	CP053300	1586447	1587274	No_name	EI24 domain-containing protein	Etoposide-induced protein 2.4 (EI24)	0	0.649973	1.26207	0.568102	DMSO	0.527196	1.26111	0.642868	Amp	1.28053	0.247874	0.816436	0.976845	Not_Sig		-0.122777
K562_RS07455	K562_RS07455	CP053300	1587271	1588086	No_name	competence/damage-inducible protein A	PFAM molybdopterin binding domain	0	-0.650776	1.88221	0.160716	DMSO	-0.297425	1.40241	0.841297	Amp	27.4018	-0.714551	0.514371	0.938769	Not_Sig		0.353351
K562_RS07460	K562_RS07460	CP053300	1588203	1588670	No_name	rhodanese-like domain-containing protein	SMART Rhodanese domain protein	0	0.255213	1.20754	0.466647	DMSO	0.487491	1.31818	0.442578	Amp	1.11172	-0.625549	0.56553	0.948418	Not_Sig		0.232278
K562_RS07470	K562_RS07470	CP053300	1590654	1591796	No_name	PAS domain-containing sensor histidine kinase	Histidine kinase	ntrB	-2.26399	1.87089	0.149681	DMSO	-1.90819	1.60314	0.323091	Amp	4.65922	-1.73072	0.15855	0.739665	Not_Sig		0.355804
K562_RS07475	K562_RS07475	CP053300	1591834	1593360	No_name	nitrogen regulation protein NR(I)	nitrogen regulation protein	ntrC	-1.72237	1.30163	0.419032	DMSO	-1.82593	1.2798	0.119303	Amp	12.3365	0.411714	0.701655	0.963899	Not_Sig		-0.103564
K562_RS07480	K562_RS07480	CP053300	1593449	1595557	No_name	S9 family peptidase	Prolyl oligopeptidase	0	0.0191674	1.57317	0.285799	DMSO	-0.266492	1.70183	0.434702	Amp	2.31346	0.951062	0.395429	0.905668	Not_Sig		-0.28566
K562_RS07485	K562_RS07485	CP053300	1595577	1596353	No_name	exodeoxyribonuclease III	Exodeoxyribonuclease III	xthA	-2.7396	1.16447	0.68788	DMSO	-3.00179	1.34896	0.880037	Amp	1.63673	0.406572	0.705136	0.965336	Not_Sig		-0.262194
K562_RS07495	K562_RS07495	CP053300	1596712	1597416	No_name	DUF3472 domain-containing protein	0	0	0.394571	1.12989	0.250225	DMSO	0.278628	1.46061	0.274572	Amp	1.20407	0.540584	0.61749	0.955832	Not_Sig		-0.115943
K562_RS07515	K562_RS07515	CP053300	1599860	1600039	No_name	hypothetical protein	0	0	1.26068	0.0133503	0.415175	DMSO	1.56694	0.0918252	0.940803	Amp	5.13495	-0.515845	0.633165	0.959237	Not_Sig		0.306263
K562_RS07520	K562_RS07520	CP053300	1600337	1601029	No_name	aspartate/glutamate racemase family protein	aspartate racemase	0	0.271415	0.289832	0.176141	DMSO	0.290705	1.24677	0.295693	Amp	2.81813	-0.0970738	0.927337	0.989739	Not_Sig		0.0192898
K562_RS07525	K562_RS07525	CP053300	1601181	1602356	No_name	DNA polymerase IV	Poorly processive, error-prone DNA polymerase involved in untargeted mutagenesis. Copies undamaged DNA at stalled replication forks, which arise in vivo from mismatched or misaligned primer ends. These misaligned primers can be extended by PolIV. Exhibits no 3'-5' exonuclease (proofreading) activity. May be involved in translesional synthesis, in conjunction with the beta clamp from PolIII	dinB	0.143733	1.54632	0.0393912	DMSO	-0.240855	1.796	0.17932	Amp	20.7232	3.62824	0.0221945	0.461362	Sig		-0.384589
K562_RS07530	K562_RS07530	CP053300	1602416	1604503	No_name	M3 family metallopeptidase	PFAM peptidase M3A and M3B, thimet oligopeptidase F	prlC	-0.412832	1.8806	0.365498	DMSO	-0.316071	1.65858	0.0880307	Amp	17.2386	-0.445791	0.678814	0.963653	Not_Sig		0.096761
K562_RS07540	K562_RS07540	CP053300	1605851	1606489	No_name	response regulator transcription factor	response regulator	styR	-0.0744087	0.315243	0.185636	DMSO	-0.36378	0.434061	0.278947	Amp	2.25796	1.49582	0.209029	0.777461	Not_Sig		-0.289371
K562_RS07545	K562_RS07545	CP053300	1606486	1609004	No_name	PAS domain S-box protein	#N/A	#N/A	-0.126992	0.747464	0.0938325	DMSO	-0.417917	0.722041	0.0780858	Amp	1.44398	4.12782	0.0145196	0.402694	Sig		-0.290925
K562_RS07550	K562_RS07550	CP053300	1609278	1611974	No_name	pyruvate dehydrogenase (acetyl-transferring)	Component of the pyruvate dehydrogenase (PDH) complex, that catalyzes the overall conversion of pyruvate to acetyl-CoA and CO(2)	aceE	-0.298755	1.76929	0.460329	DMSO	-0.523885	1.40101	0.27903	Amp	2.72167	0.724393	0.508926	0.937074	Not_Sig		-0.22513
K562_RS07555	K562_RS07555	CP053300	1612043	1613686	No_name	dihydrolipoyllysine-residue acetyltransferase	The pyruvate dehydrogenase complex catalyzes the overall conversion of pyruvate to acetyl-CoA and CO(2)	aceF	0.572859	0.268661	0.742331	DMSO	-1.44056	1.38936	0.691616	Amp	1.15203	3.43721	0.026361	0.484181	Sig		-2.01342
K562_RS07560	K562_RS07560	CP053300	1613964	1615733	No_name	dihydrolipoyl dehydrogenase	Dehydrogenase	pdhL	0.0137226	1.4907	0.217741	DMSO	-0.136796	1.71985	0.309607	Amp	2.02182	0.688771	0.528836	0.940833	Not_Sig		-0.150518
K562_RS07565	K562_RS07565	CP053300	1615932	1616498	No_name	phasin family protein	TIGRFAM phasin family protein	phaP2	0.332244	0.907933	0.356549	DMSO	0.61652	0.628285	0.255746	Amp	1.94366	-1.12214	0.324607	0.86815	Not_Sig		0.284276
K562_RS07570	K562_RS07570	CP053300	1617153	1617323	No_name	D-alanyl-D-alanine endopeptidase	#N/A	#N/A	0.309288	1.76251	0.170908	DMSO	0.322604	1.45115	0.272857	Amp	2.54885	-0.0716356	0.946331	0.995107	Not_Sig		0.013316
K562_RS07580	K562_RS07580	CP053300	1618761	1619762	No_name	D-alanyl-D-alanine endopeptidase	#N/A	#N/A	0.156425	1.57101	0.298137	DMSO	-0.13064	1.63947	0.27153	Amp	1.20558	1.233	0.285085	0.844381	Not_Sig		-0.287065
K562_RS07585	K562_RS07585	CP053300	1619876	1620685	No_name	IclR family transcriptional regulator	Transcriptional regulator	0	-1.1865	2.15763	0.699945	DMSO	-0.942202	2.42722	0.478269	Amp	2.14182	-0.499135	0.643888	0.9605	Not_Sig		0.244298
K562_RS07590	K562_RS07590	CP053300	1620869	1621591	No_name	(Fe-S)-binding protein	Cysteine-rich domain	0	-0.973672	1.95401	0.468325	DMSO	-0.751419	2.20711	0.0820868	Amp	32.5498	-0.809635	0.463561	0.924548	Not_Sig		0.222253
K562_RS07595	K562_RS07595	CP053300	1621626	1623038	No_name	lactate utilization protein	4Fe-4S ferredoxin, iron-sulfur binding	0	-0.154293	1.73514	0.588626	DMSO	-0.559359	1.9844	0.347144	Amp	2.87514	1.02667	0.362601	0.888194	Not_Sig		-0.405066
K562_RS07600	K562_RS07600	CP053300	1623167	1623394	No_name	hypothetical protein	0	0	-1.51343	1.73514	2.18967	DMSO	0.361118	1.9844	2.71172	Amp	1.53367	-0.931543	0.404306	0.911924	Not_Sig		1.87455
K562_RS07605	K562_RS07605	CP053300	1623496	1623978	No_name	low molecular weight phosphotyrosine protein phosphatase	Low molecular weight phosphotyrosine protein phosphatase	ptpA	-0.70665	2.5314	0.154879	DMSO	-0.822468	3.1872	0.196355	Amp	1.60731	0.802141	0.46742	0.926108	Not_Sig		-0.115819
K562_RS07610	K562_RS07610	CP053300	1624093	1624632	No_name	Fe-S cluster assembly transcriptional regulator IscR	Iron-sulfur cluster assembly transcription factor	iscR	-0.711631	2.23631	0.453857	DMSO	-1.27146	1.91875	0.266595	Amp	2.89824	1.84219	0.139245	0.714365	Not_Sig		-0.559834
K562_RS07615	K562_RS07615	CP053300	1624698	1625921	No_name	IscS subfamily cysteine desulfurase	Master enzyme that delivers sulfur to a number of partners involved in Fe-S cluster assembly, tRNA modification or cofactor biosynthesis. Catalyzes the removal of elemental sulfur atoms from cysteine to produce alanine. Functions as a sulfur delivery protein for Fe-S cluster synthesis onto IscU, an Fe-S scaffold assembly protein, as well as other S acceptor proteins	iscS	-0.737135	1.64813	0.277656	DMSO	-0.875226	1.95929	0.206113	Amp	1.81469	0.691679	0.52719	0.940833	Not_Sig		-0.138091
K562_RS07635	K562_RS07635	CP053300	1627464	1629332	No_name	Fe-S protein assembly chaperone HscA	Chaperone involved in the maturation of iron-sulfur cluster-containing proteins. Has a low intrinsic ATPase activity which is markedly stimulated by HscB	hscA	-0.489146	1.26694	0.467438	DMSO	-1.70372	2.04609	0.79929	Amp	2.92389	2.27197	0.0855412	0.669601	Not_Sig		-1.21458
K562_RS07640	K562_RS07640	CP053300	1629421	1629762	No_name	ISC system 2Fe-2S type ferredoxin	Ferredoxin, 2Fe-2S type, ISC system	fdx	-0.924115	1.40864	0.501674	DMSO	-1.10683	1.54855	0.0993722	Amp	25.4867	0.618821	0.569535	0.948571	Not_Sig		-0.182719
K562_RS07645	K562_RS07645	CP053300	1629782	1629991	No_name	Fe-S cluster assembly protein IscX	Fe-S assembly protein IscX	iscX	-0.697968	1.40864	2.6036	DMSO	0.411645	1.54855	0.903295	Amp	8.30784	-0.697393	0.523966	0.940778	Not_Sig		1.10961
K562_RS07650	K562_RS07650	CP053300	1630134	1630862	No_name	glycine zipper 2TM domain-containing protein	PFAM 17 kDa surface antigen	0	1.44863	0.166849	0.0792716	DMSO	1.18792	0.209731	0.178296	Amp	5.05881	2.31429	0.081647	0.658668	Not_Sig		-0.260716
K562_RS07665	K562_RS07665	CP053300	1634068	1635765	No_name	single-stranded-DNA-specific exonuclease RecJ	single-stranded-DNA-specific exonuclease RecJ	recJ	0.519936	1.04111	0.351429	DMSO	0.340608	1.15018	0.160883	Amp	4.77148	0.803626	0.466654	0.926108	Not_Sig		-0.179328
K562_RS07670	K562_RS07670	CP053300	1635780	1636856	No_name	hypothetical protein	protein conserved in bacteria	0	0.795014	0.0343324	0.372692	DMSO	0.787273	0.0346695	0.453701	Amp	1.48197	0.0228352	0.982875	0.997585	Not_Sig		-0.00774092
K562_RS07685	K562_RS07685	CP053300	1639078	1639866	No_name	TatD family hydrolase	PFAM TatD-related deoxyribonuclease	0	1.01759	0.247721	0.185963	DMSO	0.995575	0.471791	0.45386	Amp	5.95651	0.0777525	0.941759	0.994456	Not_Sig		-0.0220179
K562_RS07690	K562_RS07690	CP053300	1639923	1642403	No_name	DNA internalization-related competence protein ComEC/Rec2	Competence protein ComEC	0	0.0171619	1.56729	0.419522	DMSO	-0.00575194	1.48735	0.260485	Amp	2.59384	0.0803706	0.939803	0.994235	Not_Sig		-0.0229139
K562_RS07695	K562_RS07695	CP053300	1642685	1643530	No_name	alpha/beta hydrolase	Alpha beta hydrolase fold	0	-0.0519799	1.67116	0.580134	DMSO	0.244186	1.72201	1.24089	Amp	4.57516	-0.374488	0.727049	0.965921	Not_Sig		0.296166
K562_RS07710	K562_RS07710	CP053300	1646326	1647609	No_name	phosphopyruvate hydratase	Catalyzes the reversible conversion of 2- phosphoglycerate into phosphoenolpyruvate. It is essential for the degradation of carbohydrates via glycolysis	eno	-0.79696	1.67116	3.72161	DMSO	0.900665	1.72201	4.00957	Amp	1.16073	-0.53749	0.619437	0.955832	Not_Sig		1.69763
K562_RS07715	K562_RS07715	CP053300	1647691	1648116	No_name	cell division protein FtsB	Essential cell division protein. May link together the upstream cell division proteins, which are predominantly cytoplasmic, with the downstream cell division proteins, which are predominantly periplasmic	ftsB	-0.692443	1.67116	0.977531	DMSO	-0.982871	1.72201	3.42042	Amp	12.2433	0.141407	0.894384	0.984911	Not_Sig		-0.290428
K562_RS07720	K562_RS07720	CP053300	1648209	1648523	No_name	hypothetical protein	#N/A	#N/A	0.782112	1.09569	0.821848	DMSO	0.811314	0.277438	0.444871	Amp	3.41283	-0.0541228	0.959433	0.995162	Not_Sig		0.029202
K562_RS07725	K562_RS07725	CP053300	1648712	1649662	No_name	Hsp33 family molecular chaperone HslO	Redox regulated molecular chaperone. Protects both thermally unfolding and oxidatively damaged proteins from irreversible aggregation. Plays an important role in the bacterial defense system toward oxidative stress	hslO	0.141256	1.73143	0.433175	DMSO	0.274495	1.66466	0.436505	Amp	1.01544	-0.375269	0.726511	0.965921	Not_Sig		0.133239
K562_RS07730	K562_RS07730	CP053300	1649688	1650212	No_name	gamma carbonic anhydrase family protein	Transferase hexapeptide repeat containing protein	0	0.103892	1.3073	0.255169	DMSO	-0.403997	1.35319	0.254716	Amp	1.00356	2.4399	0.0712164	0.640082	Not_Sig		-0.507888
K562_RS07735	K562_RS07735	CP053300	1650356	1651213	No_name	ferritin-like domain-containing protein	Protein of unknown function (DUF455)	0	0.450561	1.03413	0.142873	DMSO	0.929494	0.801157	0.211217	Amp	2.18551	-3.25307	0.0312848	0.499524	Sig		0.478933
K562_RS07740	K562_RS07740	CP053300	1651391	1652281	No_name	alpha/beta hydrolase	Alpha beta hydrolase	0	0.607754	0.884375	0.250094	DMSO	0.761672	0.616731	0.198519	Amp	1.58709	-0.834915	0.450731	0.920316	Not_Sig		0.153918
K562_RS07745	K562_RS07745	CP053300	1652363	1653193	No_name	PHP domain-containing protein	SMART phosphoesterase PHP domain protein	0	0.855783	0.282698	0.356213	DMSO	0.588311	0.307806	0.298023	Amp	1.42862	0.997488	0.374981	0.892075	Not_Sig		-0.267471
K562_RS07750	K562_RS07750	CP053300	1653263	1653895	No_name	threonylcarbamoyl-AMP synthase	Belongs to the SUA5 family	0	-0.0998799	1.8772	0.397993	DMSO	0.508609	0.974021	0.258271	Amp	2.37464	-2.22138	0.090473	0.669601	Not_Sig		0.608489
K562_RS07755	K562_RS07755	CP053300	1653943	1654605	No_name	site-2 protease family protein	Peptidase M50	0	1.08819	0.0872814	0.270524	DMSO	0.97701	0.077536	0.102518	Amp	6.96331	0.665654	0.542054	0.942121	Not_Sig		-0.111182
K562_RS07765	K562_RS07765	CP053300	1655825	1656427	No_name	class I SAM-dependent methyltransferase	Methyltransferase type 11	0	-1.43548	1.98427	0.588767	DMSO	-1.61293	2.39452	0.185382	Amp	10.0867	0.497935	0.644661	0.9605	Not_Sig		-0.177453
K562_RS07775	K562_RS07775	CP053300	1657488	1658633	No_name	outer membrane protein assembly factor BamC	(Lipo)protein	0	-0.388126	0.382152	0.426499	DMSO	1.11201	1.64e-05	0.00184603	Amp	53377.7	NA	NA	NA	Not_tested		1.50013
K562_RS07780	K562_RS07780	CP053300	1658638	1659414	No_name	MBL fold metallo-hydrolase	beta-lactamase	0	0.0653006	1.67786	0.639346	DMSO	-0.044266	1.36244	0.0517554	Amp	152.602	NA	NA	NA	Not_tested		-0.109567
K562_RS07790	K562_RS07790	CP053300	1660023	1661243	No_name	cupin domain-containing protein	PFAM Cupin 4 family protein	0	-0.270507	1.68514	0.199974	DMSO	-0.0689446	1.42219	0.297972	Amp	2.22025	-0.972863	0.38571	0.897944	Not_Sig		0.201563
K562_RS07795	K562_RS07795	CP053300	1661276	1661818	No_name	peptidylprolyl isomerase	peptidyl-prolyl	slyD	0.330949	1.47295	0.491521	DMSO	0.324122	1.06172	0.323329	Amp	2.31097	0.0201006	0.984926	0.997585	Not_Sig		-0.00682764
K562_RS07800	K562_RS07800	CP053300	1661798	1663045	No_name	hypothetical protein	Hydrolyzes cAMP to 5'-AMP. Plays an important regulatory role in modulating the intracellular concentration of cAMP, thereby influencing cAMP-dependent processes	0	0.759868	0.562062	0.287425	DMSO	0.442196	0.981193	0.111769	Amp	6.61311	1.78418	0.148958	0.725963	Not_Sig		-0.317672
K562_RS07805	K562_RS07805	CP053300	1663050	1665707	No_name	DNA mismatch repair protein MutS	that it carries out the mismatch recognition step. This protein has a weak ATPase activity	mutS	-0.232289	1.6504	0.413888	DMSO	-0.188786	1.78224	0.299237	Amp	1.91309	-0.147532	0.88985	0.984353	Not_Sig		0.0435027
K562_RS07810	K562_RS07810	CP053300	1666064	1666390	No_name	EthD family reductase	EthD domain	0	-0.00126705	2.24529	0.398612	DMSO	-0.269151	2.76544	0.198174	Amp	4.04581	1.04231	0.35612	0.886667	Not_Sig		-0.267884
K562_RS07815	K562_RS07815	CP053300	1666513	1668135	No_name	NAD(P)/FAD-dependent oxidoreductase	fad dependent oxidoreductase	0	-0.460127	1.81993	0.0531246	DMSO	0.0375724	1.3156	0.300326	Amp	31.959	-2.82647	0.0475148	0.577007	Sig		0.497699
K562_RS07820	K562_RS07820	CP053300	1668443	1669246	No_name	inositol monophosphatase	Inositol monophosphatase	suhB	-1.0323	3.48974	0.535512	DMSO	-0.157078	0.718156	0.731669	Amp	1.86677	-1.67192	0.169858	0.750196	Not_Sig		0.875225
K562_RS07825	K562_RS07825	CP053300	1669529	1670353	No_name	RNA methyltransferase	Catalyzes the formation of 2'O-methylated cytidine (Cm32) or 2'O-methylated uridine (Um32) at position 32 in tRNA	trmJ	-0.677533	1.36733	0.555182	DMSO	-0.344697	1.13273	0.402079	Amp	1.90655	-0.840989	0.44769	0.919479	Not_Sig		0.332836
K562_RS07830	K562_RS07830	CP053300	1670618	1671421	No_name	serine O-acetyltransferase	serine O-acetyltransferase	cysE	0.742685	0.493603	0.143099	DMSO	-0.280001	2.04189	0.388264	Amp	7.36177	4.28073	0.0128402	0.396983	Sig		-1.02269
K562_RS07840	K562_RS07840	CP053300	1672308	1672799	No_name	peptidyl-prolyl cis-trans isomerase	PPIases accelerate the folding of proteins. It catalyzes the cis-trans isomerization of proline imidic peptide bonds in oligopeptides	ppiB	0.149822	1.46993	0.326341	DMSO	0.588771	0.751111	0.348717	Amp	1.14184	-1.59188	0.186626	0.763838	Not_Sig		0.438949
K562_RS07845	K562_RS07845	CP053300	1672888	1673463	No_name	peptidyl-prolyl cis-trans isomerase	PPIases accelerate the folding of proteins. It catalyzes the cis-trans isomerization of proline imidic peptide bonds in oligopeptides	ppiA	-0.153118	1.57995	0.580655	DMSO	-0.225235	2.3753	0.41433	Amp	1.96401	0.175111	0.869499	0.981699	Not_Sig		-0.0721173
K562_RS07850	K562_RS07850	CP053300	1673503	1674225	No_name	tetratricopeptide repeat protein	#N/A	#N/A	0.524894	1.57995	0.251661	DMSO	1.07609	2.3753	0.100924	Amp	6.21792	-3.52103	0.0244273	0.481543	Sig		0.551199
K562_RS07860	K562_RS07860	CP053300	1675901	1676728	No_name	DNA-3-methyladenine glycosylase 2 family protein	PFAM HhH-GPD family protein	0	-0.352727	1.92951	0.338491	DMSO	0.3371	0.523505	0.921036	Amp	7.40386	-1.21763	0.290282	0.844936	Not_Sig		0.689827
K562_RS07885	K562_RS07885	CP053300	1682099	1683628	No_name	NADH-quinone oxidoreductase subunit M	proton-translocating NADH-quinone oxidoreductase, chain M	0	-0.492687	1.5458	0.0747728	DMSO	-0.340937	1.48457	0.342797	Amp	21.0178	-0.74913	0.495429	0.930894	Not_Sig		0.151749
K562_RS07890	K562_RS07890	CP053300	1683902	1684789	No_name	ubiquinol oxidase subunit II	ubiquinol oxidase subunit	cyoA	-0.260825	1.88919	0.168831	DMSO	-0.158128	1.66761	0.310753	Amp	3.38787	-0.502967	0.64142	0.960343	Not_Sig		0.102697
K562_RS07895	K562_RS07895	CP053300	1684793	1686799	No_name	cytochrome o ubiquinol oxidase subunit I	Belongs to the heme-copper respiratory oxidase family	cyoB	0.275132	1.7089	0.266239	DMSO	-0.278016	1.57581	0.248337	Amp	1.14938	2.63151	0.0580944	0.604892	Not_Sig		-0.553148
K562_RS07900	K562_RS07900	CP053300	1686799	1687407	No_name	cytochrome o ubiquinol oxidase subunit III	Cytochrome O ubiquinol oxidase subunit III	cyoC	0.759367	0.27081	0.479271	DMSO	0.242747	0.0193557	0.142128	Amp	11.3712	1.78998	0.147954	0.725963	Not_Sig		-0.51662
K562_RS07905	K562_RS07905	CP053300	1687408	1687740	No_name	cytochrome o ubiquinol oxidase subunit IV	oxidase (Subunit iv)	cyoD	0.717903	1.0159	0.987	DMSO	1.00676	0.203002	0.194393	Amp	25.7795	-0.497343	0.645043	0.960643	Not_Sig		0.288853
K562_RS07910	K562_RS07910	CP053300	1687849	1688148	No_name	DUF4148 domain-containing protein	0	0	-0.0925827	1.66374	0.693001	DMSO	1.87141	0.0459527	0.374045	Amp	3.43257	-4.31966	0.0124508	0.396983	Sig		1.964
K562_RS07915	K562_RS07915	CP053300	1688366	1689040	No_name	response regulator transcription factor	Transcriptional regulatory protein, C terminal	0	-1.02995	1.14169	1.13063	DMSO	-1.62367	3.66576	0.358207	Amp	9.96254	0.867071	0.434821	0.917617	Not_Sig		-0.593723
K562_RS07920	K562_RS07920	CP053300	1689052	1690443	No_name	HAMP domain-containing histidine kinase	PhoQ Sensor	0	0.0745375	2.14976	0.23702	DMSO	-0.214165	2.21093	0.231339	Amp	1.04972	1.50979	0.205609	0.777461	Not_Sig		-0.288703
K562_RS07925	K562_RS07925	CP053300	1690463	1691128	No_name	response regulator transcription factor	Transcriptional regulatory protein, C terminal	0	-0.566843	1.67418	0.405579	DMSO	-0.00070744	1.75094	0.900412	Amp	4.9287	-0.992947	0.37694	0.892075	Not_Sig		0.566135
K562_RS07930	K562_RS07930	CP053300	1691211	1691468	No_name	DUF4148 domain-containing protein	Domain of unknown function (DUF4148)	0	1.83512	0.0380274	0.59634	DMSO	1.31305	0.240482	0.681465	Amp	1.30587	0.998581	0.374511	0.892075	Not_Sig		-0.522076
K562_RS07935	K562_RS07935	CP053300	1691579	1692994	No_name	efflux transporter outer membrane subunit	Outer membrane efflux protein	0	-0.402667	1.75913	0.161051	DMSO	-0.322001	1.93819	0.407032	Amp	6.38753	-0.319184	0.765561	0.972764	Not_Sig		0.0806664
K562_RS07940	K562_RS07940	CP053300	1692987	1694162	No_name	efflux RND transporter periplasmic adaptor subunit	Barrel-sandwich domain of CusB or HlyD membrane-fusion	0	1.64216	0.177353	0.339498	DMSO	1.14577	0.159566	0.26003	Amp	1.70462	2.01051	0.114732	0.690651	Not_Sig		-0.49639
K562_RS07945	K562_RS07945	CP053300	1694152	1697370	No_name	efflux RND transporter permease subunit	Belongs to the resistance-nodulation-cell division (RND) (TC 2.A.6) family	0	0.378365	2.04972	0.184456	DMSO	0.199074	1.96614	0.400923	Amp	4.72428	0.703664	0.520445	0.940165	Not_Sig		-0.179291
K562_RS07950	K562_RS07950	CP053300	1697665	1698021	No_name	hypothetical protein	0	0	0.346067	0.580246	0.516956	DMSO	0.460594	0.190267	0.437957	Amp	1.39329	-0.292779	0.784251	0.972764	Not_Sig		0.114527
K562_RS07955	K562_RS07955	CP053300	1698162	1700036	No_name	ABC transporter substrate-binding protein	PFAM extracellular solute-binding protein, family 5	0	-0.762411	2.04336	0.0778911	DMSO	-0.49392	2.49282	0.360945	Amp	21.4737	-1.2594	0.276363	0.836015	Not_Sig		0.268491
K562_RS07960	K562_RS07960	CP053300	1700089	1701132	No_name	ABC transporter permease subunit	PFAM binding-protein-dependent transport systems inner membrane component	yejB	-0.131968	1.69394	0.518736	DMSO	0.766935	0.812817	0.741025	Amp	2.04067	-1.72124	0.160317	0.739665	Not_Sig		0.898902
K562_RS07965	K562_RS07965	CP053300	1701181	1702278	No_name	ABC transporter permease	PFAM binding-protein-dependent transport systems inner membrane component	0	-0.213219	2.01368	0.128551	DMSO	-0.110884	2.12219	0.0718134	Amp	3.20438	-1.20373	0.295056	0.846189	Not_Sig		0.102335
K562_RS07970	K562_RS07970	CP053300	1702275	1703897	No_name	ABC transporter ATP-binding protein	Belongs to the ABC transporter superfamily	0	-0.34546	1.78046	0.310007	DMSO	-0.116564	1.59018	0.352669	Amp	1.29418	-0.844336	0.446021	0.918755	Not_Sig		0.228897
K562_RS07980	K562_RS07980	CP053300	1704842	1705759	No_name	patatin-like phospholipase family protein	PFAM Patatin	0	-0.0751392	1.56613	0.17177	DMSO	-0.222221	1.49261	0.298677	Amp	3.02352	0.739382	0.500715	0.932226	Not_Sig		-0.147081
K562_RS07990	K562_RS07990	CP053300	1707577	1707652	No_name	tRNA-Ala	#N/A	#N/A	0.196769	1.56613	0.391291	DMSO	0.595201	1.49261	1.01369	Amp	6.71142	-0.63511	0.559871	0.946196	Not_Sig		0.398432
K562_RS08015	K562_RS08015	CP053300	1708381	1708456	No_name	tRNA-Glu	#N/A	#N/A	-2.86589	1.56613	2.11531	DMSO	-1.70488	1.49261	2.07861	Amp	1.03562	-0.678067	0.534927	0.940986	Not_Sig		1.161
K562_RS08025	K562_RS08025	CP053300	1708964	1709428	No_name	GNAT family N-acetyltransferase	PFAM GCN5-related N-acetyltransferase	0	0.407449	2.03239	0.461315	DMSO	0.56383	2.14863	0.275084	Amp	2.81231	-0.504295	0.640565	0.960003	Not_Sig		0.156381
K562_RS08030	K562_RS08030	CP053300	1709454	1710338	No_name	helix-turn-helix transcriptional regulator	AraC family	0	0.080798	1.8344	0.665584	DMSO	0.431572	1.61681	0.458539	Amp	2.10695	-0.751701	0.494042	0.930894	Not_Sig		0.350774
K562_RS08035	K562_RS08035	CP053300	1710606	1711019	No_name	gamma-glutamylcyclotransferase	PFAM AIG2 family protein	0	-1.24369	1.76028	0.425927	DMSO	-1.90435	3.05909	0.260354	Amp	2.67633	2.29229	0.0836463	0.664898	Not_Sig		-0.660663
K562_RS08040	K562_RS08040	CP053300	1711152	1712744	No_name	malate synthase A	Belongs to the malate synthase family	aceB	0.17162	1.66656	0.383731	DMSO	-0.0297369	1.90888	0.265069	Amp	2.09573	0.747802	0.496147	0.930894	Not_Sig		-0.201357
K562_RS08045	K562_RS08045	CP053300	1712810	1713571	No_name	haloacid dehalogenase type II	Haloacid dehalogenase, type II	0	-0.694237	1.81595	0.214355	DMSO	-1.32843	2.03628	0.249672	Amp	1.35666	3.3381	0.0288867	0.492199	Sig		-0.634193
K562_RS08050	K562_RS08050	CP053300	1713726	1714631	No_name	LysR family transcriptional regulator	Transcriptional regulator	0	0.377786	1.3554	1.31444	DMSO	-0.0231803	1.7298	0.924179	Amp	2.02288	0.432218	0.687864	0.963653	Not_Sig		-0.400967
K562_RS08055	K562_RS08055	CP053300	1714797	1715231	No_name	universal stress protein	Belongs to the universal stress protein A family	0	-0.554049	1.81335	0.81623	DMSO	-0.860881	2.04177	0.285225	Amp	8.18938	0.614655	0.572025	0.948571	Not_Sig		-0.306832
K562_RS08060	K562_RS08060	CP053300	1715443	1716750	No_name	isocitrate lyase	Isocitrate lyase	aceA	-0.102485	1.59048	0.132617	DMSO	-0.116515	1.78549	0.286312	Amp	4.661	0.0770115	0.942313	0.994456	Not_Sig		-0.0140295
K562_RS08065	K562_RS08065	CP053300	1717141	1718685	No_name	DEAD/DEAH box helicase	Belongs to the DEAD box helicase family	rhlE1	0.421631	0.40388	0.603868	DMSO	0.738621	0.488847	0.705425	Amp	1.36464	-0.591265	0.586139	0.948571	Not_Sig		0.31699
K562_RS08070	K562_RS08070	CP053300	1719043	1719312	No_name	acyl-CoA-binding protein	acyl-coa-binding protein	0	-0.0766602	1.56228	0.444844	DMSO	-0.12235	1.61247	0.300868	Amp	2.18607	0.147358	0.889979	0.984353	Not_Sig		-0.0456894
K562_RS08080	K562_RS08080	CP053300	1720224	1720724	No_name	ribosomal protein S18-alanine N-acetyltransferase	Ribosomal-protein-alanine acetyltransferase	rimI	1.0779	0.00419862	0.129258	DMSO	1.03552	0.0561646	0.247094	Amp	3.65437	0.263206	0.805394	0.975481	Not_Sig		-0.0423761
K562_RS08090	K562_RS08090	CP053300	1721739	1722704	No_name	DUF1853 family protein	Domain of unknown function (DUF1853)	0	-1.49608	1.64116	0.372661	DMSO	-0.258507	0.411851	0.661648	Amp	3.15229	-2.82275	0.0476947	0.577655	Sig		1.23757
K562_RS08095	K562_RS08095	CP053300	1722723	1723532	No_name	bifunctional hydroxymethylpyrimidine kinase/phosphomethylpyrimidine kinase	Phosphomethylpyrimidine kinase	thiD	-0.872341	2.81843	0.108921	DMSO	0.402984	1.01542	0.0722595	Amp	2.27212	-16.8994	7.19e-05	0.0770167	Sig		1.27532
K562_RS08105	K562_RS08105	CP053300	1725117	1726187	No_name	alanine racemase	Catalyzes the interconversion of L-alanine and D- alanine. May also act on other amino acids	dadX	-0.30721	1.22113	0.308059	DMSO	-0.506841	1.14226	0.363994	Amp	1.39612	0.725106	0.508533	0.936979	Not_Sig		-0.199631
K562_RS08110	K562_RS08110	CP053300	1726199	1727575	No_name	DNA repair protein RadA	DNA-dependent ATPase involved in processing of recombination intermediates, plays a role in repairing DNA breaks. Stimulates the branch migration of RecA-mediated strand transfer reactions, allowing the 3' invading strand to extend heteroduplex DNA faster. Binds ssDNA in the presence of ADP but not other nucleotides, has ATPase activity that is stimulated by ssDNA and various branched DNA structu…	radA	0.268695	0.925187	0.266183	DMSO	0.359346	0.376564	0.226429	Amp	1.38196	-0.449297	0.676487	0.963653	Not_Sig		0.090651
K562_RS08120	K562_RS08120	CP053300	1728182	1730113	No_name	ATP-binding cassette domain-containing protein	abc transporter	0	-0.351098	2.05352	0.758496	DMSO	0.115457	1.95039	0.546363	Amp	1.92728	-0.864471	0.43609	0.918354	Not_Sig		0.466555
K562_RS08125	K562_RS08125	CP053300	1730250	1730729	No_name	glutathione peroxidase	Belongs to the glutathione peroxidase family	gpo	-1.39377	1.91324	0.224299	DMSO	-1.28464	2.01276	0.121489	Amp	3.40864	-0.741015	0.499827	0.932226	Not_Sig		0.109133
K562_RS08130	K562_RS08130	CP053300	1730788	1732227	No_name	cardiolipin synthase	Catalyzes the reversible phosphatidyl group transfer from one phosphatidylglycerol molecule to another to form cardiolipin (CL) (diphosphatidylglycerol) and glycerol	clsA	-1.18803	2.39524	0.297372	DMSO	-0.546629	2.61503	0.493617	Amp	2.75538	-1.9278	0.126134	0.701791	Not_Sig		0.641398
K562_RS08135	K562_RS08135	CP053300	1732360	1733268	No_name	50S ribosomal protein L3 N(5)-glutamine methyltransferase	Specifically methylates the 50S ribosomal protein L3 on a specific glutamine residue	prmB	0.901461	0.528288	0.190029	DMSO	0.835772	0.448638	0.406056	Amp	4.56597	0.253783	0.812174	0.976318	Not_Sig		-0.0656889
K562_RS08145	K562_RS08145	CP053300	1734503	1734871	No_name	ArsC family reductase	Belongs to the ArsC family	0	-0.138852	0.578874	0.569779	DMSO	0.398633	0.418073	0.550872	Amp	1.06982	-1.17465	0.305289	0.854117	Not_Sig		0.537484
K562_RS08155	K562_RS08155	CP053300	1735744	1736976	No_name	succinyldiaminopimelate transaminase	PFAM aminotransferase class I and II	dapC	0.461856	0.893875	0.346819	DMSO	0.283432	0.446957	0.320181	Amp	1.17331	0.654723	0.548384	0.943245	Not_Sig		-0.178424
K562_RS08160	K562_RS08160	CP053300	1737136	1738077	No_name	DMT family transporter	EamA-like transporter family	0	0.328157	0.806979	0.63177	DMSO	0.635237	0.480745	0.477637	Amp	1.74954	-0.671561	0.538654	0.942121	Not_Sig		0.307081
K562_RS08170	K562_RS08170	CP053300	1741814	1743088	No_name	cell division protein FtsZ	Essential cell division protein that stabilizes the FtsZ protofilaments by cross-linking them and that serves as a cytoplasmic membrane anchor for the Z ring. Also required for the recruitment to the septal ring of downstream cell division proteins	0	1.64072	0.125648	0.191778	DMSO	1.08368	0.530207	0.768562	Amp	16.0605	1.21802	0.290149	0.844936	Not_Sig		-0.557042
K562_RS08180	K562_RS08180	CP053300	1745327	1745860	No_name	peptide deformylase	Removes the formyl group from the N-terminal Met of newly synthesized proteins. Requires at least a dipeptide for an efficient rate of reaction. N-terminal L-methionine is a prerequisite for activity but the enzyme has broad specificity at other positions	dmf	-0.00209384	2.04806	0.332126	DMSO	0.204316	1.78037	0.194251	Amp	2.92335	-0.929179	0.405392	0.912981	Not_Sig		0.20641
K562_RS08185	K562_RS08185	CP053300	1745939	1747816	No_name	pseudouridine synthase	#N/A	#N/A	-0.189196	1.73047	0.448859	DMSO	0.0605706	1.54797	0.738236	Amp	2.70502	-0.500714	0.64287	0.9605	Not_Sig		0.249767
K562_RS08190	K562_RS08190	CP053300	1747833	1750409	No_name	[protein-PII] uridylyltransferase	Modifies, by uridylylation and deuridylylation, the PII regulatory proteins (GlnB and homologs), in response to the nitrogen status of the cell that GlnD senses through the glutamine level. Under low glutamine levels, catalyzes the conversion of the PII proteins and UTP to PII-UMP and PPi, while under higher glutamine levels, GlnD hydrolyzes PII-UMP to PII and UMP (deuridylylation). Thus, control…	glnD	-1.22143	1.89052	0.168319	DMSO	-1.51106	1.92809	0.487885	Amp	8.40172	0.971999	0.386091	0.897944	Not_Sig		-0.289629
K562_RS08195	K562_RS08195	CP053300	1750458	1751273	No_name	type I methionyl aminopeptidase	Methionine aminopeptidase	map	-0.0835059	1.55964	0.456125	DMSO	-0.168529	2.40271	0.320523	Amp	2.02511	0.26416	0.804709	0.975481	Not_Sig		-0.0850229
K562_RS08235	K562_RS08235	CP053300	1757838	1759208	No_name	RIP metalloprotease RseP	zinc metalloprotease	rseP	-0.24467	2.49967	0.534901	DMSO	-0.522534	2.0987	0.527855	Amp	1.02687	0.64042	0.556745	0.944915	Not_Sig		-0.277864
K562_RS08270	K562_RS08270	CP053300	1765860	1766504	No_name	ribonuclease HII	Endonuclease that specifically degrades the RNA of RNA- DNA hybrids	rnhB	1.01873	0.543846	0.978096	DMSO	-0.114212	0.684254	0.685023	Amp	2.0387	1.6433	0.175665	0.757272	Not_Sig		-1.13294
K562_RS08275	K562_RS08275	CP053300	1766501	1767283	No_name	RNA methyltransferase	trna rrna methyltransferase	0	-1.05743	2.10844	0.100171	DMSO	-0.145566	2.02937	0.292508	Amp	8.52691	-5.10828	0.00694246	0.299691	Sig		0.911868
K562_RS08280	K562_RS08280	CP053300	1767381	1768196	No_name	kinase/pyrophosphorylase	Bifunctional serine threonine kinase and phosphorylase involved in the regulation of the phosphoenolpyruvate synthase (PEPS) by catalyzing its phosphorylation dephosphorylation	0	-0.220886	1.22188	0.343997	DMSO	0.211994	1.38273	1.02371	Amp	8.85622	-0.694253	0.525736	0.940778	Not_Sig		0.432879
K562_RS08285	K562_RS08285	CP053300	1768572	1770974	No_name	phosphoenolpyruvate synthase	Catalyzes the phosphorylation of pyruvate to phosphoenolpyruvate	ppsA	-0.826116	1.47247	0.172143	DMSO	-0.453208	1.2895	0.169891	Amp	1.02669	-2.67054	0.0557747	0.603319	Not_Sig		0.372908
K562_RS08290	K562_RS08290	CP053300	1771185	1771619	No_name	NfeD family protein	NfeD-like C-terminal, partner-binding	0	0.0611856	1.26732	0.340309	DMSO	0.131782	1.82388	0.604552	Amp	3.15589	-0.176253	0.868659	0.981699	Not_Sig		0.0705962
K562_RS08295	K562_RS08295	CP053300	1771653	1772588	No_name	SPFH/Band 7/PHB domain protein	PFAM band 7 protein	0	0.212071	1.49547	0.114447	DMSO	-0.0439416	1.61516	0.392129	Amp	11.7394	1.08553	0.338732	0.882201	Not_Sig		-0.256013
K562_RS08300	K562_RS08300	CP053300	1772741	1773187	No_name	SsrA-binding protein SmpB	Required for rescue of stalled ribosomes mediated by trans-translation. Binds to transfer-messenger RNA (tmRNA), required for stable association of tmRNA with ribosomes. tmRNA and SmpB together mimic tRNA shape, replacing the anticodon stem-loop with SmpB. tmRNA is encoded by the ssrA gene	smpB	-1.52986	2.47188	0.46285	DMSO	-1.93868	1.96887	0.703021	Amp	2.30705	0.841253	0.447558	0.919479	Not_Sig		-0.408815
K562_RS08305	K562_RS08305	CP053300	1773287	1773724	No_name	type II toxin-antitoxin system RatA family toxin	Cyclase dehydrase	0	-0.402402	1.13067	1.21243	DMSO	-1.0132	0.397784	1.37736	Amp	1.29056	0.576537	0.595141	0.950848	Not_Sig		-0.610795
K562_RS08310	K562_RS08310	CP053300	1773729	1774052	No_name	RnfH family protein	Belongs to the UPF0125 (RnfH) family	rnfH	1.47289	1.13067	0.290808	DMSO	0.458269	0.397784	1.81259	Amp	38.8497	0.957298	0.392628	0.90491	Not_Sig		-1.01462
K562_RS08315	K562_RS08315	CP053300	1774095	1775060	No_name	DMT family transporter	EamA-like transporter family	0	-0.226811	1.77177	0.533141	DMSO	-0.365155	1.91825	0.14097	Amp	14.3031	0.434513	0.686329	0.963653	Not_Sig		-0.138344
K562_RS08320	K562_RS08320	CP053300	1775182	1775868	No_name	PQQ-binding-like beta-propeller repeat protein	amine dehydrogenase activity	0	-0.140103	2.79647	0.811406	DMSO	0.819788	0.129217	0.257874	Amp	9.90059	-1.95276	0.122568	0.700156	Not_Sig		0.959891
K562_RS08325	K562_RS08325	CP053300	1775900	1777118	No_name	helix-turn-helix domain-containing protein	#N/A	#N/A	1.19582	0.000208866	0.0452124	DMSO	1.30384	0.031542	0.236424	Amp	27.3444	-0.777294	0.480393	0.930054	Not_Sig		0.108023
K562_RS08330	K562_RS08330	CP053300	1777233	1777997	No_name	DUF899 domain-containing protein	Bacterial protein of unknown function (DUF899)	0	0.0489246	1.25988	0.547782	DMSO	-0.225078	2.11696	0.166872	Amp	10.7757	0.828776	0.45382	0.921271	Not_Sig		-0.274003
K562_RS08335	K562_RS08335	CP053300	1778026	1778835	No_name	DUF2182 domain-containing protein	Predicted metal-binding integral membrane protein (DUF2182)	0	1.45537	0.0682071	0.207857	DMSO	1.00532	0.423129	0.331608	Amp	2.54519	1.99177	0.117213	0.693197	Not_Sig		-0.450054
K562_RS08355	K562_RS08355	CP053300	1783127	1783744	No_name	3'-5' exonuclease	dna polymerase iii	0	0.426838	1.30226	0.256076	DMSO	0.356868	0.698445	0.403573	Amp	2.48374	0.253561	0.812334	0.976318	Not_Sig		-0.0699703
K562_RS08360	K562_RS08360	CP053300	1783863	1784486	No_name	2'-5' RNA ligase family protein	Hydrolyzes RNA 2',3'-cyclic phosphodiester to an RNA 2'- phosphomonoester	0	0.978767	0.54841	0.623459	DMSO	0.395989	0.96109	0.313213	Amp	3.9622	1.44673	0.221518	0.791543	Not_Sig		-0.582778
K562_RS08365	K562_RS08365	CP053300	1784567	1785016	No_name	acetyltransferase	FR47-like protein	0	0.365651	1.22124	0.207413	DMSO	0.378174	1.6863	0.20776	Amp	1.00335	-0.0738858	0.944649	0.994933	Not_Sig		0.0125232
K562_RS08370	K562_RS08370	CP053300	1785113	1785601	No_name	NUDIX hydrolase	NUDIX domain	0	-0.134561	1.67576	0.350977	DMSO	-0.0902314	1.84977	0.282267	Amp	1.54609	-0.170472	0.872914	0.981699	Not_Sig		0.0443291
K562_RS08380	K562_RS08380	CP053300	1786642	1786920	No_name	DUF971 domain-containing protein	Protein of unknown function (DUF971)	0	1.42563	1.67576	0.137633	DMSO	1.34057	1.84977	0.12261	Amp	1.26007	0.799251	0.468915	0.926108	Not_Sig		-0.085057
K562_RS08390	K562_RS08390	CP053300	1787950	1788738	No_name	ABC transporter ATP-binding protein	ABC transporter	0	1.2505	0.183302	0.476002	DMSO	0.696756	0.751748	0.0470391	Amp	102.4	NA	NA	NA	Not_tested		-0.553742
K562_RS08395	K562_RS08395	CP053300	1788735	1789610	No_name	ABC transporter permease	Binding-protein-dependent transport system inner membrane component	0	-3.04121	0.723542	0.294485	DMSO	-2.87961	0.438567	0.596133	Amp	4.09788	-0.420957	0.69542	0.963653	Not_Sig		0.161598
K562_RS08400	K562_RS08400	CP053300	1789655	1791079	No_name	ABC transporter substrate-binding protein	NMT1-like family	0	-0.323249	2.2742	0.384049	DMSO	0.0153777	1.66396	0.32314	Amp	1.41251	-1.16857	0.307469	0.855302	Not_Sig		0.338627
K562_RS08405	K562_RS08405	CP053300	1791130	1791375	No_name	ferredoxin family protein	4fe-4S ferredoxin	0	-0.0450809	1.21132	1.44404	DMSO	-0.883198	2.06275	0.543915	Amp	7.04849	0.940757	0.400094	0.908663	Not_Sig		-0.838118
K562_RS08410	K562_RS08410	CP053300	1791387	1793126	No_name	fumarate reductase/succinate dehydrogenase flavoprotein subunit	PFAM fumarate reductase succinate dehydrogenase flavoprotein domain protein	0	-0.396296	1.87635	0.527585	DMSO	0.0130433	2.19724	0.325956	Amp	2.61979	-1.14326	0.316707	0.863424	Not_Sig		0.409339
K562_RS08415	K562_RS08415	CP053300	1793123	1793891	No_name	GntR family transcriptional regulator	#N/A	#N/A	0.676697	0.98751	0.366406	DMSO	0.383329	1.35064	0.518644	Amp	2.00361	0.80018	0.468434	0.926108	Not_Sig		-0.293367
K562_RS08420	K562_RS08420	CP053300	1794208	1795440	No_name	MFS transporter	#N/A	#N/A	-2.35838	2.76372	1.37288	DMSO	1.05789	0.516391	1.11718	Amp	1.51013	-3.34303	0.0287546	0.492199	Sig		3.41627
K562_RS08425	K562_RS08425	CP053300	1795741	1796142	No_name	DUF1992 domain-containing protein	Domain of unknown function (DUF1992)	0	0.854423	2.76372	1.06186	DMSO	1.17087	0.516391	0.8985	Amp	1.39668	-0.394037	0.713658	0.965921	Not_Sig		0.316446
K562_RS08435	K562_RS08435	CP053300	1796837	1797775	No_name	muramoyltetrapeptide carboxypeptidase	PFAM peptidase U61, LD-carboxypeptidase A	ldcA	-1.22554	1.57209	0.738221	DMSO	-1.74153	0.859642	0.28182	Amp	6.86165	1.13102	0.321262	0.865861	Not_Sig		-0.515988
K562_RS08440	K562_RS08440	CP053300	1798084	1798788	No_name	GntR family transcriptional regulator	FCD domain	0	1.16191	0.019488	0.165774	DMSO	1.18043	0.0198794	0.175463	Amp	1.1203	-0.132911	0.900682	0.984911	Not_Sig		0.0185232
K562_RS08445	K562_RS08445	CP053300	1798938	1800422	No_name	NCS1 family nucleobase:cation symporter-1	PFAM permease for cytosine purines, uracil, thiamine, allantoin	0	0.924883	0.574519	0.704451	DMSO	0.50225	0.547408	0.48846	Amp	2.07991	0.853938	0.441263	0.918354	Not_Sig		-0.422633
K562_RS08450	K562_RS08450	CP053300	1800433	1801224	No_name	aspartate/glutamate racemase family protein	Racemase	hyuE	1.42045	0.574519	1.83979	DMSO	0.879579	0.547408	1.12518	Amp	2.6736	0.434397	0.686406	0.963653	Not_Sig		-0.54087
K562_RS08455	K562_RS08455	CP053300	1801385	1802338	No_name	allantoinase PuuE	PFAM polysaccharide deacetylase	0	0.891157	0.568453	0.213578	DMSO	1.04404	0.401883	0.31615	Amp	2.19116	-0.694064	0.525843	0.940778	Not_Sig		0.152887
K562_RS08460	K562_RS08460	CP053300	1802335	1802856	No_name	2-oxo-4-hydroxy-4-carboxy-5-ureidoimidazoline decarboxylase	OHCU decarboxylase	uraD	0.443672	1.44011	0.556767	DMSO	-0.090546	1.41249	0.319346	Amp	3.03966	1.4416	0.222864	0.792556	Not_Sig		-0.534218
K562_RS08465	K562_RS08465	CP053300	1802919	1803932	No_name	allantoicase	Belongs to the allantoicase family	alc	1.06632	0.27611	0.225145	DMSO	1.15664	0.41575	0.290567	Amp	1.66559	-0.42557	0.69232	0.963653	Not_Sig		0.0903168
K562_RS08470	K562_RS08470	CP053300	1803929	1804441	No_name	ureidoglycolate lyase	Catalyzes the catabolism of the allantoin degradation intermediate (S)-ureidoglycolate, generating urea and glyoxylate. Involved in the utilization of allantoin as nitrogen source	allA	0.108169	1.63728	0.347195	DMSO	0.558853	0.751311	0.313924	Amp	1.2232	-1.6677	0.170701	0.750196	Not_Sig		0.450684
K562_RS08475	K562_RS08475	CP053300	1804523	1805488	No_name	LysR family transcriptional regulator	Bacterial regulatory helix-turn-helix protein, lysR family	0	-0.567482	1.78625	0.594352	DMSO	-0.557165	1.88483	0.556343	Amp	1.14131	-0.0219497	0.983539	0.997585	Not_Sig		0.0103169
K562_RS08480	K562_RS08480	CP053300	1805639	1806043	No_name	RidA family protein	Endoribonuclease L-PSP	0	-0.265707	1.76835	0.289582	DMSO	-0.839409	1.91023	0.0444804	Amp	42.3843	NA	NA	NA	Not_tested		-0.573702
K562_RS08485	K562_RS08485	CP053300	1806077	1807006	No_name	aminotransferase class IV family protein	Amino-transferase class IV	0	0.868607	0.606635	0.119497	DMSO	0.646352	0.650403	0.0368274	Amp	10.5287	3.07859	0.0369823	0.525753	Sig		-0.222255
K562_RS08490	K562_RS08490	CP053300	1807027	1807947	No_name	LysR family transcriptional regulator	LysR substrate binding domain	0	0.737414	0.980982	0.8459	DMSO	0.512303	0.581922	0.35942	Amp	5.53903	0.424226	0.693222	0.963653	Not_Sig		-0.225111
K562_RS08495	K562_RS08495	CP053300	1808008	1808418	No_name	ACT domain-containing protein	ACT domain	0	-0.959048	0.980982	1.17361	DMSO	1.49826	0.581922	1.27962	Amp	1.18882	-2.45126	0.0703494	0.637243	Not_Sig		2.4573
K562_RS08500	K562_RS08500	CP053300	1808520	1809713	No_name	urate hydroxylase PuuD	Urate oxidase N-terminal	0	0.348249	0.925705	0.151554	DMSO	-0.0962953	1.83014	0.177353	Amp	1.36944	3.30054	0.0299182	0.497012	Sig		-0.444544
K562_RS08505	K562_RS08505	CP053300	1809765	1810118	No_name	hydroxyisourate hydrolase	Belongs to the transthyretin family. 5-hydroxyisourate hydrolase subfamily	uraH	0.868487	1.8853	0.450765	DMSO	0.665167	1.43919	0.183108	Amp	6.06018	0.72381	0.509248	0.937074	Not_Sig		-0.20332
K562_RS08510	K562_RS08510	CP053300	1810626	1812038	No_name	8-oxoguanine deaminase	Catalyzes the transformation of hydroxyatrazine to N-isopropylammelide and ethylamine in the atrazine degradation pathway	atzB	-0.0755019	1.87261	0.396091	DMSO	-0.479203	2.09656	0.639456	Amp	2.60634	0.929591	0.405203	0.912902	Not_Sig		-0.403701
K562_RS08515	K562_RS08515	CP053300	1812134	1813063	No_name	LysR family transcriptional regulator	Transcriptional regulator	0	-0.0738241	1.13067	0.558431	DMSO	0.557689	0.930412	0.548373	Amp	1.03702	-1.39756	0.234778	0.80679	Not_Sig		0.631513
K562_RS08520	K562_RS08520	CP053300	1813285	1813494	No_name	dodecin domain-containing protein	Dodecin	0	0.587727	1.40375	0.673771	DMSO	0.394024	1.70091	0.402557	Amp	2.80137	0.427463	0.691049	0.963653	Not_Sig		-0.193702
K562_RS08525	K562_RS08525	CP053300	1813629	1814522	No_name	NAD(P)-dependent oxidoreductase	PFAM 6-phosphogluconate dehydrogenase NAD-binding	0	0.596451	0.962347	0.382454	DMSO	0.296811	1.24731	0.268124	Amp	2.03464	1.11115	0.328791	0.873394	Not_Sig		-0.29964
K562_RS08530	K562_RS08530	CP053300	1814589	1815035	No_name	hypothetical protein	#N/A	#N/A	0.401056	1.13159	0.208898	DMSO	0.0123401	1.41477	0.456194	Amp	4.76901	1.34186	0.25075	0.824018	Not_Sig		-0.388716
K562_RS08535	K562_RS08535	CP053300	1815369	1815800	No_name	large conductance mechanosensitive channel protein MscL	Channel that opens in response to stretch forces in the membrane lipid bilayer. May participate in the regulation of osmotic pressure changes within the cell	mscL	1.05494	0.636167	0.474287	DMSO	-0.0740995	2.20532	0.242433	Amp	3.82736	3.67133	0.0213662	0.461362	Sig		-1.12904
K562_RS08540	K562_RS08540	CP053300	1816039	1817217	No_name	tetratricopeptide repeat protein	Tetratricopeptide repeat	0	0.301927	1.15857	0.380841	DMSO	-0.20325	1.9695	0.765736	Amp	4.04268	1.02313	0.364087	0.888977	Not_Sig		-0.505177
K562_RS08545	K562_RS08545	CP053300	1817313	1817993	No_name	PspA/IM30 family protein	Phage shock protein A	pspA	-3.88004	0.0491649	0.287803	DMSO	-1.89993	3.94789	0.996326	Amp	11.9843	-3.30709	0.0297352	0.495363	Sig		1.98011
K562_RS08550	K562_RS08550	CP053300	1818437	1820959	No_name	penicillin-binding protein 1A	penicillin-binding protein 1A	mrcA	0.307334	1.07436	0.130949	DMSO	0.0723311	1.50381	0.111781	Amp	1.37237	2.36415	0.077312	0.657828	Not_Sig		-0.235003
K562_RS08555	K562_RS08555	CP053300	1821044	1821478	No_name	DUF3574 domain-containing protein	Protein of unknown function (DUF3574)	0	0.764154	0.0486195	1.09239	DMSO	1.06189	0.0146705	0.270576	Amp	16.2996	-0.458235	0.670573	0.963033	Not_Sig		0.297739
K562_RS08560	K562_RS08560	CP053300	1821623	1822642	No_name	threonine/serine dehydratase	PFAM Pyridoxal-5'-phosphate-dependent protein beta subunit	psdht	-2.41998	0.92291	0.586527	DMSO	-2.44836	1.86282	0.646281	Amp	1.21414	0.0563239	0.957785	0.995162	Not_Sig		-0.0283806
K562_RS08565	K562_RS08565	CP053300	1822703	1823923	No_name	acetylornithine deacetylase	Belongs to the peptidase M20A family. ArgE subfamily	argE	-1.20016	2.23834	0.542675	DMSO	-1.79507	2.91835	0.43705	Amp	1.54176	1.47879	0.213278	0.78392	Not_Sig		-0.594902
K562_RS08570	K562_RS08570	CP053300	1824028	1827498	No_name	transcription-repair coupling factor	Couples transcription and DNA repair by recognizing RNA polymerase (RNAP) stalled at DNA lesions. Mediates ATP-dependent release of RNAP and its truncated transcript from the DNA, and recruitment of nucleotide excision repair machinery to the damaged site	mfd	0.52506	1.00277	0.0982551	DMSO	0.277801	1.52325	0.175677	Amp	3.19681	2.12763	0.100475	0.680788	Not_Sig		-0.247259
K562_RS08585	K562_RS08585	CP053300	1828956	1829483	No_name	carboxymuconolactone decarboxylase family protein	Antioxidant protein with alkyl hydroperoxidase activity. Required for the reduction of the AhpC active site cysteine residues and for the regeneration of the AhpC enzyme activity	ahpD	0.3353	0.507214	0.549978	DMSO	0.67699	0.821947	0.401971	Amp	1.87199	-0.868775	0.43399	0.916977	Not_Sig		0.34169
K562_RS08590	K562_RS08590	CP053300	1829560	1830108	No_name	peroxiredoxin	PFAM alkyl hydroperoxide reductase Thiol specific antioxidant Mal allergen	ahpC	1.63367	0.871275	0.480643	DMSO	-0.842797	2.76362	0.574942	Amp	1.43088	5.72387	0.00461119	0.268802	Sig		-2.47647
K562_RS08595	K562_RS08595	CP053300	1830298	1831659	No_name	GHKL domain-containing protein	PhoQ Sensor	0	-0.121714	1.5561	0.791203	DMSO	0.236286	1.8566	1.57861	Amp	3.98082	-0.35116	0.743184	0.967973	Not_Sig		0.358
K562_RS08600	K562_RS08600	CP053300	1831701	1832426	No_name	two-component system response regulator OmpR	response regulator	ompR	-0.249886	1.48552	0.248946	DMSO	-0.436922	0.900109	0.102582	Amp	5.8893	1.20316	0.295253	0.846189	Not_Sig		-0.187036
K562_RS08605	K562_RS08605	CP053300	1832694	1832972	No_name	hypothetical protein	0	0	-3.57538	1.48552	1.38508	DMSO	-3.91379	0.900109	1.20698	Amp	1.31689	0.319041	0.765661	0.972764	Not_Sig		-0.338406
K562_RS08610	K562_RS08610	CP053300	1833107	1834609	No_name	DUF1800 domain-containing protein	Protein of unknown function (DUF1800)	0	-0.417843	1.99702	0.440843	DMSO	-0.113606	1.74598	0.256468	Amp	2.95461	-1.0332	0.359881	0.886667	Not_Sig		0.304236
K562_RS08615	K562_RS08615	CP053300	1834677	1835897	No_name	DUF1501 domain-containing protein	Twin-arginine translocation pathway signal sequence	0	-0.190131	1.7185	0.3048	DMSO	0.210548	1.15037	0.0979974	Amp	9.67387	-2.16761	0.0960668	0.674479	Not_Sig		0.400679
K562_RS08620	K562_RS08620	CP053300	1835908	1836741	No_name	presqualene diphosphate synthase HpnD	Phytoene synthase	crtB	-0.771712	1.23332	0.325783	DMSO	0.0847306	0.936908	0.256088	Amp	1.61836	-3.57976	0.0231726	0.470938	Sig		0.856442
K562_RS08630	K562_RS08630	CP053300	1837255	1837548	No_name	hypothetical protein	0	0	-2.18755	1.21159	1.12887	DMSO	-1.00667	1.89505	0.385691	Amp	8.56657	-1.71455	0.161578	0.74133	Not_Sig		1.18088
K562_RS08635	K562_RS08635	CP053300	1837656	1837886	No_name	hypothetical protein	0	0	1.56012	0.00152467	0.0657202	DMSO	1.57504	0.00224128	0.024938	Amp	6.94504	-0.367527	0.731846	0.96687	Not_Sig		0.0149155
K562_RS08640	K562_RS08640	CP053300	1837998	1839107	No_name	class II histone deacetylase	Histone deacetylase domain	0	-0.100198	0.892173	0.0672143	DMSO	0.296694	1.33727	0.187126	Amp	7.75077	-3.45738	0.0258795	0.483953	Sig		0.396891
K562_RS08645	K562_RS08645	CP053300	1839122	1840330	No_name	MFS transporter	Major facilitator Superfamily	0	1.03323	1.61608	1.44779	DMSO	1.04953	0.115901	0.121393	Amp	142.24	NA	NA	NA	Not_tested		0.016305
K562_RS08650	K562_RS08650	CP053300	1840352	1841398	No_name	porin	Gram-negative porin	0	0.339854	1.06728	0.15689	DMSO	-0.380549	1.78174	1.04622	Amp	44.4688	NA	NA	NA	Not_tested		-0.720403
K562_RS08655	K562_RS08655	CP053300	1841395	1841580	No_name	hypothetical protein	#N/A	#N/A	1.35341	1.06728	1.26976	DMSO	1.20259	1.78174	0.871289	Amp	2.12381	0.169632	0.873533	0.981699	Not_Sig		-0.150817
K562_RS08660	K562_RS08660	CP053300	1841701	1842846	No_name	helix-turn-helix transcriptional regulator	helix_turn_helix, Lux Regulon	0	0.632652	0.357214	0.204211	DMSO	0.852541	0.130988	0.201035	Amp	1.03185	-1.32907	0.254568	0.827997	Not_Sig		0.219889
K562_RS08665	K562_RS08665	CP053300	1842954	1843952	No_name	2-dehydropantoate 2-reductase	2-dehydropantoate 2-reductase	0	-0.808739	2.6745	0.156835	DMSO	0.810692	1.76105	1.16847	Amp	55.5068	NA	NA	NA	Not_tested		1.61943
K562_RS08675	K562_RS08675	CP053300	1844655	1845800	No_name	glycerate kinase	Belongs to the glycerate kinase type-1 family	glxK	0.458731	0.304978	0.146225	DMSO	0.400182	0.937869	0.337489	Amp	5.32695	0.275717	0.796424	0.974972	Not_Sig		-0.0585491
K562_RS08680	K562_RS08680	CP053300	1846192	1847538	No_name	trigger factor	Involved in protein export. Acts as a chaperone by maintaining the newly synthesized protein in an open conformation. Functions as a peptidyl-prolyl cis-trans isomerase	tig	-1.69965	0.844789	0.398287	DMSO	-1.6995	3.41506	0.448393	Amp	1.26744	-0.000435742	0.999673	0.999673	Not_Sig		0.000150881
K562_RS08685	K562_RS08685	CP053300	1847679	1848332	No_name	ATP-dependent Clp endopeptidase proteolytic subunit ClpP	Cleaves peptides in various proteins in a process that requires ATP hydrolysis. Has a chymotrypsin-like activity. Plays a major role in the degradation of misfolded proteins	clpP	-0.564249	2.84479	2.97735	DMSO	-1.37572	3.41506	2.96477	Amp	1.00851	0.334508	0.754801	0.971044	Not_Sig		-0.811471
K562_RS08690	K562_RS08690	CP053300	1848496	1849767	No_name	ATP-dependent Clp protease ATP-binding subunit ClpX	ATP-dependent specificity component of the Clp protease. It directs the protease to specific substrates. Can perform chaperone functions in the absence of ClpP	clpX	0.647959	0.304182	0.474352	DMSO	0.550452	0.661087	0.803263	Amp	2.86757	0.181042	0.865138	0.981699	Not_Sig		-0.0975076
K562_RS08710	K562_RS08710	CP053300	1853172	1855106	No_name	SurA N-terminal domain-containing protein	peptidylprolyl isomerase	ppiD	-1.55176	2.34883	0.808048	DMSO	-1.70888	2.15971	0.561213	Amp	2.07309	0.276612	0.795783	0.974972	Not_Sig		-0.157118
K562_RS08715	K562_RS08715	CP053300	1855181	1855849	No_name	arylesterase	PFAM lipolytic protein G-D-S-L family	tesA	0.293278	1.33852	0.179844	DMSO	0.168545	0.944865	0.191197	Amp	1.13024	0.823058	0.456713	0.922405	Not_Sig		-0.124733
K562_RS08720	K562_RS08720	CP053300	1855848	1856561	No_name	ABC transporter ATP-binding protein	ABC transporter	0	1.41505	0.110608	0.27546	DMSO	1.11586	0.0652505	0.199373	Amp	1.9089	1.52398	0.20219	0.775948	Not_Sig		-0.299192
K562_RS08725	K562_RS08725	CP053300	1856630	1858252	No_name	glucose-6-phosphate isomerase	Belongs to the GPI family	pgi	-4.29961	0.21254	0.387388	DMSO	-4.23262	0.21535	0.257187	Amp	2.26879	-0.249526	0.815244	0.976845	Not_Sig		0.0669882
K562_RS08730	K562_RS08730	CP053300	1858364	1859908	No_name	NAD(P)H-hydrate dehydratase	Bifunctional enzyme that catalyzes the epimerization of the S- and R-forms of NAD(P)HX and the dehydration of the S-form of NAD(P)HX at the expense of ADP, which is converted to AMP. This allows the repair of both epimers of NAD(P)HX, a damaged form of NAD(P)H that is a result of enzymatic or heat-dependent hydration	nnrD	0.837162	0.675359	0.839192	DMSO	0.530773	1.1069	0.479588	Amp	3.06187	0.549038	0.612188	0.955832	Not_Sig		-0.306388
K562_RS08735	K562_RS08735	CP053300	1859961	1861262	No_name	FAD-dependent oxidoreductase	PFAM FAD dependent oxidoreductase	0	0.394549	0.825183	0.20857	DMSO	0.626791	0.63398	0.23795	Amp	1.30157	-1.27127	0.272528	0.83512	Not_Sig		0.232242
K562_RS08740	K562_RS08740	CP053300	1861591	1865655	No_name	phosphoribosylformylglycinamidine synthase	Phosphoribosylformylglycinamidine synthase involved in the purines biosynthetic pathway. Catalyzes the ATP-dependent conversion of formylglycinamide ribonucleotide (FGAR) and glutamine to yield formylglycinamidine ribonucleotide (FGAM) and glutamate	purL	-1.38955	1.03487	0.147104	DMSO	-1.66106	1.27132	0.496255	Amp	11.3805	0.90856	0.414973	0.915703	Not_Sig		-0.27151
K562_RS08745	K562_RS08745	CP053300	1865661	1866206	No_name	N-acetyltransferase	Acetyltransferase (GNAT) domain	0	1.25472	0.143343	0.493855	DMSO	1.49561	0.00318482	0.129046	Amp	14.6457	-0.817407	0.459586	0.922605	Not_Sig		0.240891
K562_RS08750	K562_RS08750	CP053300	1866379	1867161	No_name	peptidylprolyl isomerase	peptidylprolyl isomerase	0	0.3154	1.78821	0.354072	DMSO	0.225919	1.8263	0.376105	Amp	1.12832	0.300041	0.779092	0.972764	Not_Sig		-0.089481
K562_RS08755	K562_RS08755	CP053300	1867180	1867488	No_name	BolA family transcriptional regulator	Belongs to the BolA IbaG family	bolA	0.386704	1.44087	0.639988	DMSO	-0.638528	3.62143	0.844279	Amp	1.74032	1.67614	0.169018	0.750196	Not_Sig		-1.02523
K562_RS08765	K562_RS08765	CP053300	1868150	1868581	No_name	peptide-methionine (R)-S-oxide reductase MsrB	Belongs to the MsrB Met sulfoxide reductase family	msrB	1.05558	0.293966	0.224076	DMSO	0.449525	0.483828	0.205508	Amp	1.18886	3.45252	0.0259946	0.483953	Sig		-0.606058
K562_RS08770	K562_RS08770	CP053300	1868626	1870194	No_name	YdiU family protein	Belongs to the UPF0061 (SELO) family	0	0.237467	2.05162	0.476026	DMSO	0.132671	2.18952	0.175442	Amp	7.36194	0.35778	0.738588	0.967973	Not_Sig		-0.104796
K562_RS08775	K562_RS08775	CP053300	1870373	1872016	No_name	fatty-acid--CoA ligase	PFAM AMP-dependent synthetase and ligase	0	-0.263933	2.08447	0.125183	DMSO	-0.13788	1.97461	0.570366	Amp	20.7596	-0.373888	0.727462	0.965921	Not_Sig		0.126052
K562_RS08780	K562_RS08780	CP053300	1872274	1874358	No_name	enoyl-CoA hydratase/isomerase family protein	3-hydroxyacyl-coa dehydrogenase	0	-0.248021	1.41925	0.231394	DMSO	-0.75569	1.79445	0.542065	Amp	5.48782	1.49191	0.209999	0.777461	Not_Sig		-0.50767
K562_RS08785	K562_RS08785	CP053300	1874403	1875035	No_name	bifunctional nicotinamidase/pyrazinamidase	Nicotinamidase	pncA	-2.22869	3.20653	0.426204	DMSO	-1.91082	2.52878	1.19295	Amp	7.83452	-0.434606	0.686267	0.963653	Not_Sig		0.317866
K562_RS08790	K562_RS08790	CP053300	1875086	1876264	No_name	acetyl-CoA C-acyltransferase	Belongs to the thiolase family	0	0.21085	0.579065	0.394623	DMSO	0.372044	0.445301	0.381434	Amp	1.07035	-0.508706	0.637733	0.959237	Not_Sig		0.161194
K562_RS08795	K562_RS08795	CP053300	1876527	1877927	No_name	GGDEF domain-containing protein	Diguanylate cyclase, GGDEF domain	0	-0.420518	1.66819	0.0967701	DMSO	-0.815868	2.25613	0.173292	Amp	3.20682	3.45004	0.0260535	0.483953	Sig		-0.39535
K562_RS08800	K562_RS08800	CP053300	1878019	1880160	No_name	hypothetical protein	0	0	-0.100572	1.62328	0.130293	DMSO	-0.0814211	1.39525	0.268693	Amp	4.25277	-0.111078	0.916905	0.988771	Not_Sig		0.0191505
K562_RS08805	K562_RS08805	CP053300	1880864	1881259	No_name	RidA family protein	Endoribonuclease L-PSP	0	0.421401	1.43059	0.456972	DMSO	1.02882	0.261848	0.143525	Amp	10.1373	-2.19651	0.0930139	0.673298	Not_Sig		0.607423
K562_RS08810	K562_RS08810	CP053300	1881513	1882127	No_name	hypothetical protein	#N/A	#N/A	0.614046	1.10409	0.0740904	DMSO	0.748238	1.08668	0.0470457	Amp	2.48018	-2.64828	0.0570841	0.603319	Not_Sig		0.134191
K562_RS08815	K562_RS08815	CP053300	1882688	1883002	No_name	Dabb family protein	PFAM Stress responsive alpha-beta barrel	0	-3.7719	0.0464772	1.67235	DMSO	0.301074	0.0648819	0.618285	Amp	7.31605	-3.95663	0.0167249	0.417234	Sig		4.07298
K562_RS08825	K562_RS08825	CP053300	1883652	1884611	No_name	alpha/beta hydrolase	Alpha beta hydrolase	0	0.690862	0.465563	0.176718	DMSO	0.983932	0.268717	0.456815	Amp	6.68219	-1.03635	0.358575	0.886667	Not_Sig		0.29307
K562_RS08830	K562_RS08830	CP053300	1884652	1885098	No_name	GNAT family N-acetyltransferase	PFAM GCN5-related N-acetyltransferase	0	-2.68106	0.465563	1.60996	DMSO	-4.13115	0.268717	0.806637	Amp	3.98359	1.39478	0.235549	0.807886	Not_Sig		-1.45009
K562_RS08835	K562_RS08835	CP053300	1885115	1885960	No_name	NRDE family protein	Transport and Golgi organisation 2	0	-0.15659	1.35804	0.422484	DMSO	0.262131	1.18235	0.638681	Amp	2.28532	-0.947079	0.397226	0.907029	Not_Sig		0.418721
K562_RS08845	K562_RS08845	CP053300	1887149	1888168	No_name	endolytic transglycosylase MltG	Functions as a peptidoglycan terminase that cleaves nascent peptidoglycan strands endolytically to terminate their elongation	mltG	0.347036	0.0411133	0.288691	DMSO	-0.670754	0.793539	0.74017	Amp	1.5735	-0.705743	0.0451928	0.940165	Sig		-1.01779
K562_RS08860	K562_RS08860	CP053300	1889977	1890756	No_name	TatD family hydrolase	TIGRFAM hydrolase, TatD family	0	0.56632	1.25902	0.427478	DMSO	0.355321	1.41368	0.339453	Amp	1.58588	0.669511	0.539832	0.942121	Not_Sig		-0.210999
K562_RS08865	K562_RS08865	CP053300	1890800	1891510	No_name	ankyrin repeat domain-containing protein	Pfam Ankyrin	arp3	0.023478	1.41875	0.373941	DMSO	0.37882	1.08534	0.63027	Amp	2.84085	-0.839829	0.448269	0.919551	Not_Sig		0.355342
K562_RS08870	K562_RS08870	CP053300	1891629	1891985	No_name	hypothetical protein	0	0	0.620419	2.07819	1.76994	DMSO	1.22479	0.00590297	0.0943468	Amp	351.935	NA	NA	NA	Not_tested		0.604372
K562_RS08875	K562_RS08875	CP053300	1892075	1893247	No_name	mechanosensitive ion channel	Mechanosensitive ion channel	0	0.0330145	1.50993	0.118916	DMSO	0.271032	1.16949	0.570638	Amp	23.0271	-0.707259	0.518433	0.939631	Not_Sig		0.238018
K562_RS08880	K562_RS08880	CP053300	1893291	1894466	No_name	AAA family ATPase	AAA domain, putative AbiEii toxin, Type IV TA system	0	0.71217	1.26037	0.246435	DMSO	0.532203	1.19234	0.326676	Amp	1.75724	0.761753	0.488646	0.930054	Not_Sig		-0.179967
K562_RS08885	K562_RS08885	CP053300	1894751	1895815	No_name	glycosyltransferase family 4 protein	glycosyl transferase group 1	0	0.200717	1.09535	0.606499	DMSO	-0.536887	1.22923	0.298396	Amp	4.1312	1.89009	0.131737	0.703306	Not_Sig		-0.737604
K562_RS08890	K562_RS08890	CP053300	1895946	1896533	No_name	hypothetical protein	Las17-binding protein actin regulator	0	1.05526	0.778714	1.51796	DMSO	1.01394	0.189832	0.529104	Amp	8.2307	0.0445199	0.966624	0.996968	Not_Sig		-0.0413192
K562_RS08895	K562_RS08895	CP053300	1896783	1897232	No_name	membrane protein	0	0	0.876719	0.209089	0.339647	DMSO	1.13809	0.0711934	0.303213	Amp	1.25476	-0.994295	0.376357	0.892075	Not_Sig		0.261368
K562_RS08900	K562_RS08900	CP053300	1897492	1897782	No_name	phosphate starvation-inducible protein PsiF	PFAM PsiF repeat protein	psiF	-0.265753	2.4813	0.983064	DMSO	-0.334251	2.59888	1.13646	Amp	1.33642	0.0789554	0.94086	0.994456	Not_Sig		-0.0684981
K562_RS08905	K562_RS08905	CP053300	1898054	1899076	No_name	asparaginase	Belongs to the asparaginase 1 family	ansB	0.682341	1.00254	1.09305	DMSO	0.380467	1.21517	0.0853684	Amp	163.941	NA	NA	NA	Not_tested		-0.301873
K562_RS08910	K562_RS08910	CP053300	1899168	1899638	No_name	peptidoglycan-binding protein LysM	Peptidoglycan-binding LysM	0	-0.684497	1.86749	0.514938	DMSO	-1.25473	2.08884	0.270502	Amp	3.62384	1.69801	0.164739	0.746566	Not_Sig		-0.57023
K562_RS08915	K562_RS08915	CP053300	1900098	1900991	No_name	2-hydroxy-3-oxopropionate reductase	2-Hydroxy-3-oxopropionate reductase	glxR	0.178198	1.33665	0.549592	DMSO	-0.0288733	1.9503	0.120676	Amp	20.7413	0.637406	0.558518	0.945473	Not_Sig		-0.207071
K562_RS08920	K562_RS08920	CP053300	1901033	1901842	No_name	hydroxypyruvate isomerase	Belongs to the hyi family	hyi	-0.618029	1.83472	0.114043	DMSO	-1.01208	1.7876	0.785068	Amp	47.389	NA	NA	NA	Not_tested		-0.394055
K562_RS08925	K562_RS08925	CP053300	1901886	1903661	No_name	glyoxylate carboligase	Belongs to the TPP enzyme family	gcl	0.854005	0.605885	0.367927	DMSO	0.99959	0.453505	0.433948	Amp	1.39108	-0.443221	0.680523	0.963653	Not_Sig		0.145585
K562_RS08930	K562_RS08930	CP053300	1903833	1904744	No_name	LysR family transcriptional regulator	Transcriptional regulator	0	0.18148	1.43768	0.242113	DMSO	-0.345145	2.13843	0.301497	Amp	1.55071	2.35892	0.0777544	0.657828	Not_Sig		-0.526625
K562_RS08935	K562_RS08935	CP053300	1904912	1905551	No_name	RNA polymerase sigma factor	#N/A	#N/A	-1.52808	2.06797	0.39237	DMSO	-1.17434	2.14515	1.07074	Amp	7.44696	-0.537286	0.619566	0.955832	Not_Sig		0.353746
K562_RS08940	K562_RS08940	CP053300	1905541	1906437	No_name	anti-sigma factor	Putative zinc-finger	0	0.23203	1.11364	0.762228	DMSO	0.281071	1.41279	0.600175	Amp	1.61293	-0.0875552	0.934438	0.991793	Not_Sig		0.0490413
K562_RS08960	K562_RS08960	CP053300	1907690	1908142	No_name	50S ribosomal protein L9	binds to the 23S rRNA	rplI	-3.94084	1.11364	0.961525	DMSO	-3.06511	1.41279	1.92782	Amp	4.01988	-0.70408	0.520211	0.940165	Not_Sig		0.875728
K562_RS08970	K562_RS08970	CP053300	1909804	1910430	No_name	DUF47 domain-containing protein	phosphate transport regulator	0	0.851589	0.0133328	0.0729673	DMSO	-0.626939	1.76959	0.386643	Amp	28.0778	6.5085	0.00287602	0.2238	Sig		-1.47853
K562_RS08975	K562_RS08975	CP053300	1910441	1911451	No_name	inorganic phosphate transporter	Phosphate transporter	pit	0.0925322	1.3903	1.24776	DMSO	-0.274057	0.725546	0.115456	Amp	116.797	NA	NA	NA	Not_tested		-0.366589
K562_RS08980	K562_RS08980	CP053300	1911598	1912683	No_name	C40 family peptidase	PFAM NLP P60 protein	0	0.223834	0.703061	0.464497	DMSO	0.497573	0.407063	0.365627	Amp	1.61394	-0.802067	0.467458	0.926108	Not_Sig		0.273739
K562_RS08985	K562_RS08985	CP053300	1912920	1914722	No_name	PhoH family protein	PFAM PhoH family protein	0	0.244489	1.19467	0.17917	DMSO	0.128773	1.69604	0.15934	Amp	1.26439	0.835898	0.450237	0.920083	Not_Sig		-0.115716
K562_RS08990	K562_RS08990	CP053300	1915058	1915519	No_name	peroxiredoxin	PFAM alkyl hydroperoxide reductase Thiol specific antioxidant Mal allergen	bcp	-0.702839	1.61916	0.538573	DMSO	-0.597386	1.65661	0.449289	Amp	1.43693	-0.260418	0.807398	0.975481	Not_Sig		0.105453
K562_RS09020	K562_RS09020	CP053300	1920862	1921233	No_name	EamA family transporter	Small Multidrug Resistance protein	0	-1.9718	1.61916	3.02994	DMSO	-2.24015	1.65661	2.81946	Amp	1.15488	0.112302	0.915994	0.988771	Not_Sig		-0.26835
K562_RS09030	K562_RS09030	CP053300	1923047	1923421	No_name	Xcc1710-like domain-containing protein	Protein of unknown function (DUF498/DUF598)	0	-0.911245	1.80253	0.318839	DMSO	-0.805618	1.95221	0.19222	Amp	2.75135	-0.491409	0.648881	0.960654	Not_Sig		0.105627
K562_RS09035	K562_RS09035	CP053300	1923738	1924976	No_name	pyridoxal phosphate-dependent aminotransferase	PFAM aminotransferase class I and II	aatA	-0.324254	1.61998	0.592437	DMSO	-0.273409	1.51217	0.349243	Amp	2.87759	-0.128055	0.904285	0.984911	Not_Sig		0.0508446
K562_RS09040	K562_RS09040	CP053300	1925030	1926358	No_name	homoserine dehydrogenase	homoserine dehydrogenase	hom	-0.497888	0.819951	0.453829	DMSO	-0.866201	1.0615	0.654106	Amp	2.07736	0.801303	0.467853	0.926108	Not_Sig		-0.368313
K562_RS09050	K562_RS09050	CP053300	1928070	1929317	No_name	molybdopterin molybdotransferase MoeA	MoeA domain protein domain I and II	moeA2	0.747344	1.46545	0.915301	DMSO	0.153744	2.13678	0.710427	Amp	1.65993	0.88736	0.425019	0.915703	Not_Sig		-0.5936
K562_RS09055	K562_RS09055	CP053300	1929337	1929594	No_name	molybdopterin converting factor subunit 1	Involved in sulfur transfer in the conversion of molybdopterin precursor Z to molybdopterin	moaD	1.71944	0.00487065	0.11014	DMSO	1.66613	0.014295	0.142831	Amp	1.68171	0.511941	0.635661	0.959237	Not_Sig		-0.0533103
K562_RS09060	K562_RS09060	CP053300	1929605	1930081	No_name	molybdenum cofactor biosynthesis protein MoaE	PFAM molybdopterin biosynthesis MoaE	moaE	0.145638	2.21596	0.840029	DMSO	0.0100964	1.29471	0.38131	Amp	4.85324	0.254482	0.81167	0.976318	Not_Sig		-0.135542
K562_RS09065	K562_RS09065	CP053300	1930144	1930704	No_name	group III truncated hemoglobin	PFAM globin	0	-0.0101726	1.93811	0.501438	DMSO	0.263144	1.10336	0.479957	Amp	1.09152	-0.682015	0.532675	0.940833	Not_Sig		0.273316
K562_RS09070	K562_RS09070	CP053300	1930958	1931476	No_name	Rrf2 family transcriptional regulator	Rrf2 family	0	-0.456583	1.80071	0.595185	DMSO	-0.537114	1.7421	0.0631481	Amp	88.8349	NA	NA	NA	Not_tested		-0.0805314
K562_RS09075	K562_RS09075	CP053300	1931622	1934219	No_name	ATP-dependent chaperone ClpB	Part of a stress-induced multi-chaperone system, it is involved in the recovery of the cell from heat-induced damage, in cooperation with DnaK, DnaJ and GrpE	clpB	0.025179	1.74342	0.372056	DMSO	-0.109413	1.86528	0.195738	Amp	3.61301	0.554516	0.608768	0.955832	Not_Sig		-0.134592
[truncated: 86,102 more rows]

## Sheet: Sheet2_small
locusId	sysName	scaffoldId	begin	end	name	desc	eggNOG desc	gene	Fit_C1	Var_C1	SD_C1	Cond1	Fit_C2	Var_C2	SD_C2	Cond2	Fcalc	Tcalc	pvalue	adjpvalue_fdr	Category		Delta
[truncated: 42,929 more rows]
